# Supplementary material for: Pathway Based Analysis of Mutation Data Is Efficient for Scoring Target Cancer Drugs
Source: Front Pharmacol. 2019 Jan 23;10:1. doi: 10.3389/fphar.2019.00001 (PMC6351482; doi:10.3389/fphar.2019.00001)
Supplement: Supplementary Data Sheet 3 — Mutation drug scores for 3800 TCGA tumor samples for 10 versions of drug scoring algorithm. The dataset contains 10 tables that match the 10 methods of drug scoring. [file Data_Sheet_3.ZIP]

Archive with 10 entries (10 files):
- MDS2.csv
- MDS2_gene.csv
- MDS.csv
- MDS_b.csv
- MDS_gene.csv
- MDS_gene_b.csv
- MDS_m.csv
- MDS_N.csv
- MDS_N_b.csv
- MDS_N_m.csv
