# Supplementary material for: Pathway Based Analysis of Mutation Data Is Efficient for Scoring Target Cancer Drugs
Source: Front Pharmacol. 2019 Jan 23;10:1. doi: 10.3389/fphar.2019.00001 (PMC6351482; doi:10.3389/fphar.2019.00001)
Supplement: Supplementary Data Sheet 3 — Mutation drug scores for 3800 TCGA tumor samples for 10 versions of drug scoring algorithm. The dataset contains 10 tables that match the 10 methods of drug scoring. [file Data_Sheet_3.ZIP › MDS.csv]

	TCGA.AG.3881.01	TCGA.63.6202.01	TCGA.MH.A561.01	TCGA.DZ.6135.01	TCGA.BR.8368.01	TCGA.HU.A4GQ.01	TCGA.36.1571.01	TCGA.19.5953.01	TCGA.41.2573.01	TCGA.CZ.4865.01	TCGA.A4.A57E.01	TCGA.02.0114.01	TCGA.81.5911.01	TCGA.27.2526.01	TCGA.BP.4351.01	TCGA.B8.5159.01	TCGA.IN.8663.01	TCGA.AH.6644.01	TCGA.CM.5344.01	TCGA.AA.3685.01	TCGA.EI.6508.01	TCGA.AA.3697.01	TCGA.AA.3977.01	TCGA.AG.A02X.01	TCGA.DC.4745.01	TCGA.AA.3494.01	TCGA.85.6560.01	TCGA.A6.6782.01	TCGA.D5.6533.01	TCGA.G4.6293.01	TCGA.HT.7873.01	TCGA.DU.7294.01	TCGA.DB.A64R.01	TCGA.FG.6690.01	TCGA.DU.6542.01	TCGA.HT.8109.01	TCGA.DU.A5TW.01	TCGA.HT.7877.01	TCGA.HW.8322.01	TCGA.HT.7695.01	TCGA.DU.6393.01	TCGA.QH.A65Z.01	TCGA.HT.8106.01	TCGA.DB.A64P.01	TCGA.DB.A64X.01	TCGA.DU.5851.01	TCGA.06.6701.01	TCGA.HT.7879.01	TCGA.FG.7634.01
Abemaciclib_(LY2835219)	115.8765326	129.4744469	24.37857171	6.833744116	124.6586964	243.3653346	17.02575175	7.325199864	11.62122956	68.61463917	53.78745728	55.75085186	21.02009447	6.562215456	13.29398849	8.918257279	93.00261367	106.355197	13.98887574	124.5956898	104.340476	90.81147163	951.0023206	153.9071239	111.493516	63.58979374	88.55012283	126.3396099	84.41274082	45.62548711	0	6.169474431	0.886524823	95.92600164	43.95265597	3.085030194	25.56032049	0.562113547	3.598252038	5.843479475	2.08022856	4.267513656	32.16680658	1.109074506	105.3566516	29.56173583	0.913854207	55.32158121	4.365450577
Afatinib	689.4443698	563.1112645	112.0236376	52.09091176	746.5781613	1371.700784	34.08381856	35.78979839	36.3361684	115.1195658	196.829854	132.3146459	102.1656809	30.31915735	71.41624007	57.77302476	186.1545993	695.4271933	194.3013792	364.0356662	440.5078088	353.4738395	5365.424608	605.4781775	642.934582	251.6583348	397.4881804	592.1380288	370.6244936	240.3805906	8.039894072	25.57232711	10.58673472	208.7947469	99.37739659	27.98283138	173.9356654	17.36848077	9.842832571	40.14843396	13.26377533	19.94555589	65.30247941	24.71080224	298.4240369	71.16739913	22.53118091	127.8330794	36.95105386
Aflibercept	520.3321897	466.9714427	86.97839055	41.53607957	585.7530463	1180.499378	26.60872498	37.11489073	33.51117396	92.27792051	177.0421967	111.9201881	47.91905887	27.97072078	75.45875835	56.06248342	163.1907466	548.9845364	159.4150876	323.8810116	378.7282664	324.5041623	4897.048473	467.8551601	573.7158643	199.8747026	374.7970163	519.7740251	306.8012793	205.090052	3.393964157	22.46603501	7.551335404	166.6105848	80.54508595	19.59467461	182.3530661	13.5452452	5.496548258	48.84293225	10.82314412	16.27119171	51.99905809	31.70312956	231.8014322	59.43645302	25.77967532	98.31494257	29.47611297
Alectinib	229.0839922	243.5101397	40.14858349	17.46649909	281.5912368	575.9716042	14.58357654	20.06656974	14.95784664	52.29010613	91.84127305	65.15181077	21.93046486	14.94320483	31.06140305	14.39959235	77.15326215	240.3413635	83.36668841	178.256429	182.9993703	172.6932993	2415.31937	227.0931981	272.478742	112.1935353	211.419871	280.1982712	148.1678386	93.35983986	1.31845831	16.69697513	0.886524823	97.3277398	43.75072961	18.19055977	78.12291167	5.127228764	1.127657723	20.59902895	3.342192506	8.369613647	30.66694899	14.0560691	127.9114572	34.4282937	16.93196715	53.82029773	8.084230161
Alemtuzumab	0.998521599	0	0	0	5.810723994	8.888384565	0	0	0	0	0	0	0	0.154607297	1.995491172	0	1.262906236	6.841155553	0	0	3.669354092	2.927644071	30.98618262	2.91781879	3.035886882	0	3.838075624	1.870693669	0	1.769447691	0	0	0	0	0	0	0	0	0	0	0	0.49382716	0	0	0.938967136	0	0	0	0
Alitretinoin	55.45814261	40.90249777	12.95420164	2.640060932	46.82436496	103.7082904	4.166736153	1.504481724	1.592667253	17.81853983	21.15814644	15.97039087	5.9157774	1.55607666	7.348208505	5.145797351	8.377769032	49.99754098	8.617088865	49.35281373	41.34890353	28.44723768	483.0055681	52.66365793	53.18605434	19.56274179	35.63315449	43.44544311	31.2789664	30.15621324	1.394700139	0	0.459136823	27.36413263	13.01329024	5.68175093	17.59038143	0	0	2.876577421	0.261437908	5.034074417	10.60878516	5.01973863	37.97205943	9.222361195	0.26816841	16.23336357	3.625270052
Apalutamide_ARN-509	42.27741055	44.62014291	16.2868338	1.083456063	55.13481714	113.860254	4.166736153	3.870797702	1.773925183	16.13647249	16.63046735	17.29756566	4.470367503	4.371857022	2.730924114	9.381198024	13.06579424	35.30952392	15.72206412	54.78998348	37.47866801	43.39607018	438.6490184	52.25106505	54.57668578	21.2191711	39.26988868	47.92263493	40.85766081	36.73692775	0.309214595	3.779099354	0	27.86196614	13.63786489	1.308353282	8.72971375	1.124227094	0.661238751	3.466873684	0.985767551	1.895688816	11.87790142	7.479071349	37.32203596	9.811307415	5.851804851	14.58357654	2.471507991
Arsenic_trioxide	273.3988774	278.8108369	62.1048777	18.73836813	311.3062865	681.6668779	27.8445869	18.48046553	20.12339796	104.355664	100.0729882	100.7683224	34.61356414	16.86809397	27.21571185	27.93645775	128.7172789	256.9741555	77.62390782	261.9489828	236.0744929	205.0005267	2449.55992	308.6451533	289.5209434	130.3645584	210.6842689	289.3347627	190.6248356	126.6202829	1.812456566	19.85350726	6.122361788	168.1546974	76.06087386	17.09399864	68.97548919	2.808838294	6.835235961	15.84907487	10.30578216	20.25959579	65.82376196	7.483339163	204.1349946	56.49033037	18.29133052	100.9245781	19.34859141
Atezolizumab	0	1.272361758	0	0	0.726216412	0	0	0	0	0	0	0	0	0	0	0	0.84227414	0	0	0	1.216545012	0	7.918886129	0	0	0	0	0	0	0.84227414	0	0	0	0	0	0	0	0	0	0	0	0	0	0	0	0	0	0	0
Avelumab	0	1.272361758	0	0	0.726216412	0	0	0	0	0	0	0	0	0	0	0	0.84227414	0	0	0	1.216545012	0	7.918886129	0	0	0	0	0	0	0.84227414	0	0	0	0	0	0	0	0	0	0	0	0	0	0	0	0	0	0	0
Axitinib	480.3882025	414.0015471	80.22741286	44.54987335	539.3026713	1113.139612	21.84461726	28.98729229	28.30613714	76.91748498	149.784545	95.52272578	45.95949274	24.08315652	61.29725439	47.28312453	131.3395561	510.2978937	143.1401241	298.2434686	348.0323513	279.8834144	4450.52118	426.91868	513.2582641	189.8845615	335.2545188	468.8476199	290.1620888	194.6653429	4.788664296	18.73610367	7.092198582	139.0635235	67.3236626	22.81455324	157.492458	13.02884964	4.374732211	42.60611492	9.439832739	14.96083789	45.02762513	21.70000551	209.2993059	50.4193944	22.85286773	89.23471762	26.16966827
Belinostat	145.0155801	221.9481357	73.55927223	10.07198267	178.5990195	507.6861739	54.74249642	5.014756216	9.045162508	170.7224807	169.2678481	198.9258903	14.98872876	2.962576959	7.697321475	14.63668539	139.4247795	136.0408559	35.62674681	408.2122196	260.5576145	303.1813303	1708.436101	265.644479	267.3359498	180.1775244	240.8384133	318.4899905	224.8927464	79.67850095	3.391546451	4.343028368	0.886524823	328.0031597	157.3422931	16.48814496	62.70296724	4.472548757	8.41418186	3.70370728	4.497041854	5.827088085	119.0854656	0.714995934	309.0254333	100.8905566	2.134344168	177.0782042	3.306444708
Bevacizumab	520.3321897	466.9714427	86.97839055	41.53607957	585.7530463	1180.499378	26.60872498	37.11489073	33.51117396	92.27792051	177.0421967	111.9201881	47.91905887	27.97072078	75.45875835	56.06248342	163.1907466	548.9845364	159.4150876	323.8810116	378.7282664	324.5041623	4897.048473	467.8551601	573.7158643	199.8747026	374.7970163	519.7740251	306.8012793	205.090052	3.393964157	22.46603501	7.551335404	166.6105848	80.54508595	19.59467461	182.3530661	13.5452452	5.496548258	48.84293225	10.82314412	16.27119171	51.99905809	31.70312956	231.8014322	59.43645302	25.77967532	98.31494257	29.47611297
Bexarotene	48.42103825	36.88382056	12.59639428	2.640060932	42.45978908	100.96585	4.166736153	1.504481724	1.592667253	17.81853983	20.81696596	15.97039087	5.665902338	1.55607666	7.348208505	4.522161554	8.377769032	42.85097367	8.617088865	49.35281373	41.34890353	28.44723768	470.9902074	47.38582966	51.24895003	19.56274179	35.00951869	42.43080077	29.34095613	29.53257745	1.394700139	0	0.459136823	27.36413263	13.01329024	5.011060119	17.59038143	0	0	2.876577421	0.130718954	5.034074417	10.60878516	4.572911106	36.44483366	9.222361195	0.26816841	16.23336357	3.001634255
Bicalutamide	42.27741055	44.62014291	16.2868338	1.083456063	55.13481714	113.860254	4.166736153	3.870797702	1.773925183	16.13647249	16.63046735	17.29756566	4.470367503	4.371857022	2.730924114	9.381198024	13.06579424	35.30952392	15.72206412	54.78998348	37.47866801	43.39607018	438.6490184	52.25106505	54.57668578	21.2191711	39.26988868	47.92263493	40.85766081	36.73692775	0.309214595	3.779099354	0	27.86196614	13.63786489	1.308353282	8.72971375	1.124227094	0.661238751	3.466873684	0.985767551	1.895688816	11.87790142	7.479071349	37.32203596	9.811307415	5.851804851	14.58357654	2.471507991
Binimetinib_(MEK162)	1010.047207	727.4597269	104.0758404	47.99549338	1042.127408	1644.435507	39.20933608	46.98025612	48.23664014	135.2025513	196.9362061	143.0159815	94.27297486	28.60506386	67.7683432	99.48698751	135.6974584	924.8845791	143.5520579	485.3995593	504.2442723	413.8052659	5999.823403	824.1649742	694.893015	248.7319539	406.3211881	725.994894	437.9830433	300.6299628	13.49700068	36.60939749	14.98761001	237.1831354	112.6176697	24.21847431	147.9063985	22.87698456	9.740927216	45.97897217	15.68164336	27.91947463	74.87779405	34.80481191	457.293064	81.00688671	23.55722518	146.3980832	74.45752389
Blinatumomab	128.9661363	154.0434705	19.44974231	5.03065223	151.9285204	276.4734851	8.930843871	10.33755839	6.963590227	26.40095762	43.11069575	35.18885744	14.39471725	9.020133702	11.77913711	13.54159258	27.22699927	126.4955674	30.59604996	92.6354629	106.1908046	93.69543347	1325.372907	108.8742663	128.5616188	53.15683256	95.7243852	133.1505038	82.23931623	55.33962937	0.309214595	4.951011851	0.886524823	54.72826525	25.00041692	6.85163357	34.8533539	2.810567735	0	7.819082507	2.954640748	3.475030428	18.23393368	10.57718466	65.40543152	20.51150372	13.19232506	30.01815065	11.89133197
Bortezomib	115.23686	163.3596801	19.56964818	8.476786114	225.4881356	586.712165	21.97311302	20.3866858	17.2436707	115.9078195	78.69553355	83.8825872	15.35540245	15.55171687	30.00073977	17.19789941	56.77169776	108.1714413	42.71120562	170.5192043	143.8492095	146.6278164	2330.500281	176.1233999	260.8862705	90.65411404	255.9507802	172.4494496	134.7832005	94.67894905	1.524524558	121.5086818	0.886524823	139.5839256	63.22225719	4.432584036	55.25668069	1.853102444	1.785934882	8.982389408	4.623755009	5.157946161	48.20330924	4.68595109	139.7410483	46.58918415	6.981496442	72.91788268	3.118178983
Bosutinib	802.6198091	832.6655515	131.306254	58.17094682	952.1862264	1892.147327	82.34798748	53.82656585	52.81305667	274.1410654	314.5730142	338.3899897	89.7280436	40.6246314	72.64981111	87.24374818	299.3448576	848.9392424	181.7936748	851.6711764	685.0769785	628.3260238	6857.284471	862.6263116	855.678672	385.7394735	615.2633401	887.1672075	648.3994729	342.8610577	13.5954855	79.50467057	17.73049645	508.6534993	237.2141332	31.70279074	188.7134183	24.82498491	13.85839046	52.33797419	15.65225061	28.0733223	164.7997979	40.11435088	615.4616845	164.2935264	35.15782962	282.792157	57.9290235
Brentuximab_vedotin	60.76206281	68.00295156	9.531860591	2.640060932	77.86979988	116.2971204	4.166736153	5.225811252	2.658248651	12.99214548	20.95872654	17.20058508	6.593659084	4.128192305	4.014875172	2.393049845	12.4074316	51.44815419	14.44343433	59.59381754	45.61957869	53.84560505	568.6764293	59.53903273	55.70367589	24.31004531	47.28952678	69.67971277	33.0564062	19.91312073	0	3.378684807	0	27.36413263	12.50020846	5.273004022	15.73469379	0.562113547	0	8.681041024	0.130718954	0.999631468	9.605736937	9.968131081	34.03922284	9.811307415	12.50465502	14.58357654	1.224236397
Brigatinib	684.9475282	560.8825339	104.1851781	51.00866068	732.0246149	1345.371472	34.08381856	35.54595543	36.3361684	115.1195658	196.829854	132.3146459	101.9158058	30.31915735	71.41624007	54.05008527	177.9748131	678.8488217	176.5144547	364.0356662	433.9669517	350.8394598	5298.183109	602.4631441	633.2298807	249.9477273	392.7435916	591.5970323	365.0493574	234.5970207	6.956470454	25.57232711	10.58673472	208.7947469	99.37739659	24.2884569	172.3331013	17.36848077	9.842832571	40.14843396	13.00233742	19.94555589	65.30247941	24.71080224	296.1051821	71.16739913	22.53118091	125.9062971	34.45651068
Cabazitaxel	8.118467906	10.38361251	0	7.946643723	26.32795862	63.83437554	0	0	1.263719086	3.87675304	0.617675008	0	1.613032904	0	2.554403569	2.900495023	3.152250109	32.52539659	0.701547176	7.455670169	18.4642373	9.187179737	239.5012491	15.59196224	12.31647245	5.934593954	4.491904655	14.2821932	11.91131263	20.09416488	0.61842919	0	3.546099291	0	0	0	0	0	1.641123628	0	3.070347727	9.608277901	0	0	12.99952244	0	0.377517388	0	0.623635797
Cabozantinib	570.3844431	485.4818892	105.0830027	58.52882113	632.0827657	1272.573327	29.91708241	34.63310216	34.03263591	98.31411874	175.9904988	123.4859089	61.87005465	28.41378917	71.46402209	56.46933976	162.8363063	584.686967	154.6170766	359.399362	401.870248	337.9523077	5011.155008	504.965033	586.1713716	216.2991458	379.8502497	535.0230556	334.8486676	232.6504755	5.591877147	29.30225846	12.35978437	180.7727615	86.87718814	24.95914771	172.7176421	15.68214013	9.175781582	48.68782313	11.88585091	16.65448324	58.33104644	29.84442019	259.4363944	64.51198123	29.06487027	111.9132953	35.08014647
Carfilzomib	108.6470239	124.910689	19.56964818	8.476786114	222.4043426	542.8108848	11.55627264	20.3866858	17.2436707	84.65729832	47.4450124	47.42364587	15.35540245	15.55171687	30.00073977	9.409737415	26.69417838	106.8574953	42.71120562	108.018162	103.5568525	109.3312972	2190.048825	131.1955009	224.1230991	59.40359289	219.4918389	134.6995193	102.5384428	94.67894905	1.524524558	121.5086818	0.886524823	71.87446315	31.25052115	4.432584036	37.27405334	0.562113547	1.785934882	7.104455135	4.623755009	3.365831466	27.36962848	4.68595109	77.83162098	25.75550338	6.981496442	36.45894134	3.118178983
Ceritinib_(Zykadia_LDK378)	229.0839922	243.5101397	40.14858349	17.46649909	281.5912368	575.9716042	14.58357654	20.06656974	14.95784664	52.29010613	91.84127305	65.15181077	21.93046486	14.94320483	31.06140305	14.39959235	77.15326215	240.3413635	83.36668841	178.256429	182.9993703	172.6932993	2415.31937	227.0931981	272.478742	112.1935353	211.419871	280.1982712	148.1678386	93.35983986	1.31845831	16.69697513	0.886524823	97.3277398	43.75072961	18.19055977	78.12291167	5.127228764	1.127657723	20.59902895	3.342192506	8.369613647	30.66694899	14.0560691	127.9114572	34.4282937	16.93196715	53.82029773	8.084230161
Cetuximab	684.9475282	560.8825339	104.1851781	51.00866068	732.0246149	1345.371472	34.08381856	35.54595543	36.3361684	115.1195658	196.829854	132.3146459	101.9158058	30.31915735	71.41624007	54.05008527	177.9748131	678.8488217	176.5144547	364.0356662	433.9669517	350.8394598	5298.183109	602.4631441	633.2298807	249.9477273	392.7435916	591.5970323	365.0493574	234.5970207	6.956470454	25.57232711	10.58673472	208.7947469	99.37739659	24.2884569	172.3331013	17.36848077	9.842832571	40.14843396	13.00233742	19.94555589	65.30247941	24.71080224	296.1051821	71.16739913	22.53118091	125.9062971	34.45651068
Cobimetinib	1010.047207	727.4597269	104.0758404	47.99549338	1042.127408	1644.435507	39.20933608	46.98025612	48.23664014	135.2025513	196.9362061	143.0159815	94.27297486	28.60506386	67.7683432	99.48698751	135.6974584	924.8845791	143.5520579	485.3995593	504.2442723	413.8052659	5999.823403	824.1649742	694.893015	248.7319539	406.3211881	725.994894	437.9830433	300.6299628	13.49700068	36.60939749	14.98761001	237.1831354	112.6176697	24.21847431	147.9063985	22.87698456	9.740927216	45.97897217	15.68164336	27.91947463	74.87779405	34.80481191	457.293064	81.00688671	23.55722518	146.3980832	74.45752389
Crizotinib	577.0510514	541.3555515	106.7292341	56.80573506	699.4949794	1337.396555	39.64157708	35.10761791	36.68693904	126.6261789	206.6228684	150.067052	66.50084552	27.45066874	72.11313507	46.90340036	174.035095	613.9308577	160.9048234	416.0758583	442.7346654	378.4222799	5249.895378	567.1947155	617.7282513	268.6278023	410.5572684	592.3839365	340.1473926	235.2091742	8.437615032	27.91328274	10.58673472	235.363394	111.8776051	29.45435128	175.565764	17.67951636	8.162272087	47.3645396	13.44010823	21.89671086	76.90392557	29.97796565	308.994959	80.80904753	28.35887078	137.6523826	29.4674243
CYT387_(Momelotinib)	348.7260005	236.131744	37.75433834	9.604805365	306.9566615	572.0315322	10.3839915	13.81253347	12.37391762	34.44393583	53.20691388	37.55120751	29.26686546	10.28069686	22.02224981	48.82826245	48.45981023	301.1739733	64.9170535	182.3950186	188.4720856	152.6768009	2183.738481	218.040575	194.7409387	74.14994349	148.8309497	226.1710069	159.4145768	112.1162018	3.304247608	12.18069909	1.773049645	56.44464686	28.82583286	14.44981724	60.8054969	5.370057509	3.16569505	19.22912975	4.253969229	7.31874801	21.97406258	18.26358022	121.1111057	20.90608648	19.91306286	31.41344051	40.51329159
Dabrafenib	1004.41554	731.6780153	102.7088245	44.30832201	967.6248945	1569.874953	40.09796103	44.55295267	47.35125374	139.4852743	203.0297008	152.2250579	92.40747848	31.32675587	68.62997691	90.52098871	147.6816097	912.24013	147.5799969	481.7069839	497.969663	399.5444755	5920.907769	817.6942602	716.6237073	254.1817039	425.6293627	774.8065797	452.8517429	302.6738818	11.99636961	38.03190799	13.21456037	248.8825592	118.1277093	26.1975184	152.7677077	21.75275746	6.955775729	45.52200438	14.30902352	28.64974008	81.46917028	39.74869468	440.4372394	84.5788208	28.99957708	147.9095247	64.3024386
Daratumumab	10.59575097	8.339578799	0.7702862	1.543709637	14.7088259	21.99941425	0	0	0.849541825	1.455604076	1.632821372	0	1.403089212	0	0.768049155	2.382737666	0.291120815	13.16994124	0.442673749	5.316179697	12.51747561	4.884993532	106.2559677	7.575810153	12.92675628	3.446034019	7.508794245	7.967492567	4.343742423	3.891593457	0.309214595	0.393081761	0.886524823	0	0	0.670690812	1.221001221	1.124227094	0	0	0	0.268232945	0	0	1.825914281	0.888888889	3.003832046	1.926782274	0.623635797
Dasatinib	1101.585118	1070.906677	159.8424793	81.98281138	1206.053836	2313.328965	92.96020466	67.39890284	66.12181794	310.0110026	372.8181292	378.5754242	120.2889565	54.31005957	96.38318781	120.7466843	359.4703866	1144.1768	234.8068345	954.4481321	880.3284047	727.3494841	8710.368754	1049.66439	1071.05562	455.8712295	745.2179145	1061.109413	785.780993	431.8827766	15.19609599	81.99055339	24.73938306	579.1689241	270.0079318	37.67054959	271.0726752	28.91635699	14.55415541	57.56114454	23.87353632	31.61025685	183.4634421	43.24283021	704.8741928	188.5970867	46.13017187	325.8180857	91.85022061
Degarelix	12.04515336	19.74350877	4.030053529	0	31.71639595	44.73507157	0	2.83492524	2.00884331	2.531707278	0.881834215	0	2.789354788	3.405722933	1.931311843	1.751574937	1.583692752	22.18242437	1.037299631	8.193474722	6.293439659	10.59111816	225.9652835	22.37868007	9.407651735	1.372887865	18.9989638	15.48417741	7.793119577	8.340168928	1.166112624	0.348310693	0	0	2.766407084	3.759703542	2.584940312	1.124227094	0	0.704721635	0.224466891	1.430615165	4.275023202	1.464624936	1.397328923	0	0.249500998	0	2.294327355
Denileukin_diftitox_(Ontac)	355.1942007	289.6289818	41.5100466	25.64068976	372.5111258	665.3013778	17.30606515	13.62243165	11.27250334	50.67028076	102.0889716	58.35978345	28.18359254	9.848699684	33.2836553	22.72265437	75.48920589	330.5446981	91.43148217	211.593394	255.1687195	214.3876891	2993.258974	275.8190579	322.8770938	135.8930139	220.9075716	284.7187945	172.5493893	107.744718	3.463473984	9.192975282	1.773049645	96.60676382	46.03383463	20.66937109	126.1004356	6.777393781	1.570706112	24.66997014	5.301260662	7.550429762	30.93784604	17.8802359	136.9020626	34.23560378	22.26374559	59.08979295	16.19149552
Denosumab	148.6294947	149.1683473	19.78672697	10.32265389	191.8473176	261.419306	8.042218925	11.68350855	7.144385199	20.02492419	55.78313004	26.11525867	8.801727659	5.368646416	11.98935683	9.465854315	35.54052636	143.4208461	43.21047458	107.4479019	91.33953091	128.0390967	1429.455413	138.5062305	148.6388234	41.75428251	109.1214375	141.2343028	71.19277831	56.42729806	1.009243715	3.696145125	2.659574468	41.35801711	18.75031269	6.439870938	35.67108125	1.443511896	0.171732784	11.8468328	2.513423389	1.999262936	13.77247309	28.75900284	52.78650192	15.45587868	10.56720935	24.22764587	8.23810751
Docetaxel	45.86519119	64.83092575	1.614910244	9.876981447	89.63093519	204.2483061	8.333472306	6.014599206	5.74979932	31.0703788	33.43427108	29.88637637	4.846884276	0.243664717	8.378146465	4.541312465	9.718562386	77.2219138	17.25409219	67.60732141	81.76498272	67.87589617	680.2853043	78.91617994	62.70885017	46.01335206	48.67497086	66.38444273	49.27178345	48.8356228	1.886630959	0	3.546099291	54.16756999	30.41047629	5.014837866	16.04517645	0	0.813993769	0.938967136	3.79467737	8.869179601	16.66694461	0.26816841	66.66190852	16.66694461	1.272704183	29.59265186	1.87090739
Dovitinib	713.43009	622.8078378	155.6501954	54.20641553	778.1677136	1489.759277	36.16718664	42.15632481	42.31196938	120.4418763	204.4428792	146.3849622	77.21869981	34.92036088	84.95107263	76.33253342	182.1181991	704.400254	183.7602304	445.5873959	497.2116463	397.6988482	5765.451321	640.2938182	673.7593005	252.6610133	443.4129759	654.3678311	420.564187	280.7954091	6.571447544	25.25374494	10.5549859	221.398439	105.6275008	38.05434357	182.1494083	23.51555416	9.633752099	49.85390742	14.68795368	22.68646855	73.19596354	27.85751429	315.3897405	79.99794881	32.36621897	139.1744465	50.67104139
Durvalumab	98.22106936	110.4744616	17.37049762	6.201031718	112.1542651	200.2892159	6.250104229	7.29807504	4.652486678	20.04696568	34.25979387	27.00478011	8.11725866	5.950064207	6.434854012	8.900305691	20.91516449	94.89501695	26.20739512	73.60275163	67.22834076	68.70204832	906.1573448	87.02327015	97.83556903	38.85947072	73.51460904	102.2903811	60.44621845	36.37392103	0.750315535	3.696145125	1.773049645	41.18637275	18.75031269	6.180942758	26.44333979	1.124227094	0	6.880115371	0.985767551	1.999262936	13.77247309	10.57718466	48.38154281	14.56698979	8.3118803	22.92544423	5.589686974
Elotuzumab	2.470589136	3.258507103	0	0	3.835512297	9.759947894	0	1.389318337	0	0	0	0.674210342	2.224704114	0	0.666666667	0	0.200320513	4.051745068	0.736322804	0	0.689941583	4.115879742	64.67799236	3.58349794	0.732600733	1.020979792	3.440154165	1.51457985	1.494797329	1.743848091	0	0.393081761	0	0	0	0	0	0	0	0	0	0	0	0	0.40063004	0.888888889	1.876612714	0	1.401148942
Enzalutamide	42.27741055	44.62014291	16.2868338	1.083456063	55.13481714	113.860254	4.166736153	3.870797702	1.773925183	16.13647249	16.63046735	17.29756566	4.470367503	4.371857022	2.730924114	9.381198024	13.06579424	35.30952392	15.72206412	54.78998348	37.47866801	43.39607018	438.6490184	52.25106505	54.57668578	21.2191711	39.26988868	47.92263493	40.85766081	36.73692775	0.309214595	3.779099354	0	27.86196614	13.63786489	1.308353282	8.72971375	1.124227094	0.661238751	3.466873684	0.985767551	1.895688816	11.87790142	7.479071349	37.32203596	9.811307415	5.851804851	14.58357654	2.471507991
Erlotinib	685.6915758	560.8825339	104.1851781	51.00866068	733.984581	1349.314176	34.08381856	35.54595543	36.3361684	115.1195658	196.829854	132.3146459	101.9158058	30.31915735	71.41624007	54.4410172	177.9748131	680.7044773	177.1396788	366.6866358	435.9536156	353.6273633	5314.167194	606.7410208	634.5766055	250.56696	393.4682293	591.5970323	367.8793964	236.0378747	6.956470454	25.57232711	10.58673472	208.7947469	99.37739659	24.2884569	172.3331013	17.36848077	9.842832571	40.14843396	13.00233742	19.94555589	65.30247941	26.81772363	296.1051821	71.16739913	22.53118091	125.9062971	34.45651068
Estramustine	146.1666293	165.006548	29.58299387	6.745731155	196.7210828	342.4775084	21.68945683	8.729123781	8.277800962	67.66273127	84.62837727	81.87372456	15.3109108	7.359615643	11.86071208	13.76882511	39.64786336	149.8401978	33.3769934	184.6056236	142.6679249	150.5304712	1300.684729	208.444583	170.5530625	110.3826258	148.0551017	171.6653621	135.8571326	61.10916973	2.426440942	4.980342995	0.886524823	137.5812784	62.9576633	12.63075802	39.91093921	2.810567735	2.428788047	5.456645233	3.256851669	6.902300771	45.33752203	12.52853657	147.1521929	43.73414286	6.702237046	73.34338147	9.331501754
Everolimus	305.1768271	306.3076704	55.07593897	19.13341785	350.2788186	642.2647344	19.76124918	26.46154852	19.8879069	67.38460539	84.36540383	87.75728714	32.3808672	23.63742425	28.48105507	43.80870356	60.8146948	318.5649019	77.99169668	219.9572016	218.9655097	161.5834115	2455.869736	313.0725138	341.9083447	105.6504226	177.0788823	277.8420475	195.2067943	170.8973547	4.811884792	17.7494517	5.694973788	124.2536278	59.33725594	10.16309496	59.34429982	11.15320053	3.511240514	16.50248512	18.1347003	14.57906863	40.70465092	21.1165412	186.4678785	43.80343275	17.34102282	72.63515287	30.0680249
Exemestane	1.559818238	0.264131009	0.227531286	0	2.731913787	15.8750863	0	2.673796791	1.075757576	0.630119723	0	0	0	0	0	0	0.291120815	2.668192948	2.611873375	1.064962726	3.177796554	0.916664417	47.18013686	0.957854406	2.514108311	2.281746032	1.613846904	0.868395303	0.673400673	1.07022607	0.309214595	0	0	0	0.625390869	0	0	0	0	0	0	0	0.227531286	0	1.984126984	0	0	0	0
Flavopiridol_(Alvociclib)	883.3132539	754.8823219	147.7607717	78.71534793	917.2178011	1867.175698	70.1182875	45.57828134	46.48302454	277.8243266	307.2673361	257.9194127	118.4500789	32.75778106	76.44532194	67.63259596	252.5451147	822.6248556	196.5656071	655.7909637	654.7662304	590.0722464	7304.962805	822.0924524	915.7889671	369.866164	600.9098823	808.080345	574.8865817	335.8907714	8.660385188	36.17444909	15.47849566	428.4722109	202.4828321	34.57846137	208.0138967	21.0207182	16.63974844	43.51096465	16.85093536	29.22979941	139.7386233	25.98033543	541.0814984	138.7240665	24.20006989	248.7119746	40.06923285
Foretinib	878.3290563	677.3546028	140.2840477	65.31375948	921.1031332	1664.681188	38.25055472	44.94354552	46.15225125	129.9153097	220.5333546	158.6934418	115.3033789	35.65135503	86.49394071	89.82875104	213.1307493	828.8708945	205.0926561	463.3017573	535.7907633	424.5778913	6344.599224	740.9180232	749.0571953	274.6427984	462.622064	715.0524794	464.8829791	305.2319116	8.712311799	27.19917039	15.47849566	236.7082905	112.6798513	38.05434357	192.0842352	18.49270786	13.74312922	54.08638815	15.16996253	22.81843426	76.73257997	32.69569114	360.0937387	82.46239749	35.65437003	147.0999483	60.64921414
Fulvestrant	129.0714538	140.778572	28.86157098	5.662275092	172.0426808	290.3661374	17.52272067	8.051617006	8.057488118	55.16252281	67.64020266	66.9305076	14.41549541	7.115950925	8.50984893	12.75164346	35.27346967	130.8702551	24.80299181	154.1815416	117.4943251	121.4143233	1130.749994	173.9017508	146.112359	94.25078364	125.8436834	150.6253694	116.5202081	51.3304825	2.426440942	4.980342995	0.886524823	110.4974934	50.45745484	11.96006721	28.03249892	2.810567735	2.428788047	4.517678096	3.256851669	6.902300771	37.00404973	12.26036816	122.4551895	35.40067055	6.056551248	58.75980493	8.707865958
Ganetespib_(STA-9090)	128.1163483	174.7882614	25.30155493	10.86052089	122.8530679	334.2977717	29.25685449	10.28490059	7.318105993	78.50979721	85.38412118	104.5867043	13.10954637	9.734842742	20.60379841	35.07026094	49.65608987	111.9819756	24.31333721	233.7663562	170.004536	140.3773445	1244.67168	169.6474664	197.4033757	90.08444852	132.8689342	156.1099883	155.7506419	91.35678944	0	6.982415729	2.659574468	166.5584329	76.86012207	9.884605755	48.41099528	1.290988897	3.603730921	6.395612369	6.067164199	7.1834927	52.18322361	4.890689364	196.8684891	52.76214059	6.179414393	91.35502376	11.80300975
Gefitinib	684.9475282	560.8825339	104.1851781	51.00866068	732.0246149	1345.371472	34.08381856	35.54595543	36.3361684	115.1195658	196.829854	132.3146459	101.9158058	30.31915735	71.41624007	54.05008527	177.9748131	678.8488217	176.5144547	364.0356662	433.9669517	350.8394598	5298.183109	602.4631441	633.2298807	249.9477273	392.7435916	591.5970323	365.0493574	234.5970207	6.956470454	25.57232711	10.58673472	208.7947469	99.37739659	24.2884569	172.3331013	17.36848077	9.842832571	40.14843396	13.00233742	19.94555589	65.30247941	24.71080224	296.1051821	71.16739913	22.53118091	125.9062971	34.45651068
Goserelin	15.85042589	29.52062623	6.819352897	0.236574403	39.22790368	66.42883629	0.833333333	4.025681703	3.286944489	3.549976425	0.881834215	0	4.080435452	4.748790179	1.931311843	1.751574937	2.698503933	32.08713372	3.849692512	10.58776263	12.00417495	17.41141675	345.2482237	27.81668149	13.44395443	4.121278868	26.33329423	27.99913696	11.11800179	11.09876983	1.784541814	0.348310693	0	0	2.766407084	7.036315297	3.466774527	1.686340641	0	0.704721635	0.224466891	2.145922747	4.275023202	1.464624936	1.646829921	0	0.499001996	0	2.294327355
Homoharringtonine_(Omacetaxine_mepesuccinate)	31.03749839	2.252126699	8.858639875	1.792114695	1.845047742	70.48069457	0	0	0	0.809061489	0	0	0	0	0	1.291989664	0	2.091489263	0	20.08032129	51.61098638	0.573363185	367.3270909	15.67787658	40.33376966	0.496031746	3.104711148	6.405740466	0	28.1810047	0.091100193	0	0	0	0	0	0	0	0	0	0	0	0	0	0	0	0.091100193	0	0
Ibritumomab_tiuxetan	26.64274909	22.08137569	0.357807357	0.510464523	39.38172532	35.30373529	2.083368076	0.825082508	3.523522479	6.250104229	7.81677491	7.291788268	1.574707696	0.825082508	0.825082508	3.74181478	0	19.27924601	1.487637222	22.41924898	23.04908735	13.7777693	138.6612985	21.33502479	20.43590936	6.882237532	17.43536646	17.00735219	11.94721276	5.087431465	0	0.393081761	0	13.5418925	6.250104229	0.670690812	3.304369297	0.562113547	0	0	0	0	4.166736153	0	16.15938454	5.055625042	2.50483005	7.291788268	3.74181478
Ibrutinib	285.0236317	239.8328202	28.6028985	16.63604495	334.7684492	468.4332876	10.61995326	18.97048102	13.12467589	28.70227822	82.36734364	34.9051399	18.83080948	9.169710063	25.72698382	20.13376413	54.42791544	249.0611282	56.22229173	160.2606559	157.1305053	219.1256224	2286.319088	223.5626754	222.9121888	67.98103329	164.2648478	199.8635194	115.1445081	97.39337757	0.87735737	8.262396717	3.546099291	55.4719685	25.00041692	10.19559194	68.47034661	4.565115217	1.127657723	19.63488415	3.289482536	5.360835652	18.23393368	30.19707446	85.45284677	20.70586718	12.96593392	31.94493292	16.34537287
Idelalisib	1231.418923	931.6174994	160.6376316	71.60461257	1270.457392	2383.736367	52.04063862	73.50553025	73.07662872	161.7305536	269.3024872	185.3167314	116.2420397	53.98303478	105.9621213	231.9067743	202.9144187	1244.652632	249.0916515	649.6997216	701.5634393	582.2742849	8364.35396	1009.961891	955.0319146	308.7700694	694.7182642	870.5119945	594.4466867	519.387419	14.86324348	35.50408961	22.99808224	292.5801715	140.9143629	26.25312478	222.365151	34.81778273	13.47060224	62.78578454	20.68640191	35.7731632	99.32509777	62.56293924	486.9452007	102.8156274	39.58118006	182.4047955	197.8257861
Imatinib	850.1791491	875.1194045	135.2613606	59.16652298	926.9222222	1775.602851	85.27939553	47.71564458	45.94510136	276.8909724	345.666778	329.891219	85.84245238	37.63751907	76.09642482	76.06167535	343.0868926	885.3425331	186.9756793	803.26627	743.0067168	630.9230526	6889.561144	851.2941724	856.173162	406.0426806	624.6732862	904.8758445	602.7630446	302.0593542	7.968326563	36.40364565	13.21456037	532.6558442	249.8929799	34.24369923	238.3073142	29.15829736	19.83616367	43.56467597	15.67294648	22.44671232	170.5081711	28.5456105	602.2115375	176.3021808	31.1347259	301.5904398	63.09249963
Inotuzumab_ozogamicin	15.24405512	9.102743386	1.524017273	0.510464523	18.34199926	22.58744373	0	1.389318337	0.220312844	0	1.566670681	0.674210342	2.724454239	0	0.666666667	1.247271593	0.200320513	10.89364166	0.736322804	5.144588772	9.962895556	7.765966143	128.5881708	9.282053632	7.380428143	1.311466357	9.233967261	6.850596671	4.310715793	4.110242163	0	1.572327044	0	0	0	0.670690812	1.221001221	0	0	0	0	0	0	0	3.858632828	1.777777778	4.381442764	0	2.648420536
Ipilimumab	7.960465399	9.645758654	0.762008637	0	11.18815371	11.06337389	0	0	0	0	0.925925926	0	0.249875062	0	0	1.87090739	0.818277206	7.779440934	0.969377724	4.052172243	2.56351817	0.624219725	51.90752794	7.520049317	5.4456339	0.341646737	2.492218356	1.303242627	2.9190086	3.290408494	0	0	0	0	0	0	0.881834215	0	0	0	0	0	0	0	1.527225768	0	0	0	1.87090739
Ixabepilone	8.118467906	10.38361251	0	7.946643723	26.32795862	63.83437554	0	0	1.263719086	3.87675304	0.617675008	0	1.613032904	0	2.554403569	2.900495023	3.152250109	32.52539659	0.701547176	7.455670169	18.4642373	9.187179737	239.5012491	15.59196224	12.31647245	5.934593954	4.491904655	14.2821932	11.91131263	20.09416488	0.61842919	0	3.546099291	0	0	0	0	0	1.641123628	0	3.070347727	9.608277901	0	0	12.99952244	0	0.377517388	0	0.623635797
Ixazomib_(MLN9708)	108.6470239	124.910689	19.56964818	8.476786114	222.4043426	542.8108848	11.55627264	20.3866858	17.2436707	84.65729832	47.4450124	47.42364587	15.35540245	15.55171687	30.00073977	9.409737415	26.69417838	106.8574953	42.71120562	108.018162	103.5568525	109.3312972	2190.048825	131.1955009	224.1230991	59.40359289	219.4918389	134.6995193	102.5384428	94.67894905	1.524524558	121.5086818	0.886524823	71.87446315	31.25052115	4.432584036	37.27405334	0.562113547	1.785934882	7.104455135	4.623755009	3.365831466	27.36962848	4.68595109	77.83162098	25.75550338	6.981496442	36.45894134	3.118178983
Lapatinib	689.4443698	563.1112645	112.0236376	52.09091176	746.5781613	1371.700784	34.08381856	35.78979839	36.3361684	115.1195658	196.829854	132.3146459	102.1656809	30.31915735	71.41624007	57.77302476	186.1545993	695.4271933	194.3013792	364.0356662	440.5078088	353.4738395	5365.424608	605.4781775	642.934582	251.6583348	397.4881804	592.1380288	370.6244936	240.3805906	8.039894072	25.57232711	10.58673472	208.7947469	99.37739659	27.98283138	173.9356654	17.36848077	9.842832571	40.14843396	13.26377533	19.94555589	65.30247941	24.71080224	298.4240369	71.16739913	22.53118091	127.8330794	36.95105386
Lenalidomide	148.6294947	149.1683473	19.78672697	10.32265389	191.8473176	261.419306	8.042218925	11.68350855	7.144385199	20.02492419	55.78313004	26.11525867	8.801727659	5.368646416	11.98935683	9.465854315	35.54052636	143.4208461	43.21047458	107.4479019	91.33953091	128.0390967	1429.455413	138.5062305	148.6388234	41.75428251	109.1214375	141.2343028	71.19277831	56.42729806	1.009243715	3.696145125	2.659574468	41.35801711	18.75031269	6.439870938	35.67108125	1.443511896	0.171732784	11.8468328	2.513423389	1.999262936	13.77247309	28.75900284	52.78650192	15.45587868	10.56720935	24.22764587	8.23810751
Lenvatinib	673.0314711	561.6896035	96.25667512	58.24392706	699.8279392	1359.033832	35.33385331	36.34210307	34.64164005	118.0827006	210.9801417	141.7423194	65.81000285	30.55128362	90.12652746	64.84939454	181.7478234	652.3476651	159.9591219	397.0629136	445.0935838	359.1615324	5321.166019	599.0043088	626.0221857	247.8553126	413.5933309	606.5868228	376.518483	257.5092174	5.901091742	30.92910174	8.781936256	221.398439	105.6275008	33.68927829	175.3588569	16.24425367	10.17378557	46.54560448	14.3856488	19.21812022	71.46137463	26.42716295	301.04236	77.50649582	28.70357523	136.1409411	42.56377603
Letrozole	1.559818238	0.264131009	0.227531286	0	2.731913787	15.8750863	0	2.673796791	1.075757576	0.630119723	0	0	0	0	0	0	0.291120815	2.668192948	2.611873375	1.064962726	3.177796554	0.916664417	47.18013686	0.957854406	2.514108311	2.281746032	1.613846904	0.868395303	0.673400673	1.07022607	0.309214595	0	0	0	0.625390869	0	0	0	0	0	0	0	0.227531286	0	1.984126984	0	0	0	0
Leuprolide	12.04515336	19.74350877	4.030053529	0	31.71639595	44.73507157	0	2.83492524	2.00884331	2.531707278	0.881834215	0	2.789354788	3.405722933	1.931311843	1.751574937	1.583692752	22.18242437	1.037299631	8.193474722	6.293439659	10.59111816	225.9652835	22.37868007	9.407651735	1.372887865	18.9989638	15.48417741	7.793119577	8.340168928	1.166112624	0.348310693	0	0	2.766407084	3.759703542	2.584940312	1.124227094	0	0.704721635	0.224466891	1.430615165	4.275023202	1.464624936	1.397328923	0	0.249500998	0	2.294327355
Lomustine	4.8870437	7.536346839	0	0	4.141291642	18.7658286	2.083368076	0	1.984126984	7.325624286	6.851788947	7.68772879	0	0	0	0	0	1.136634031	0.122279286	15.71179267	8.598511719	10.90065232	58.96375877	8.46157543	9.220773739	6.250104229	10.88874386	7.746540428	7.774159517	2.786487683	0	1.54012654	0	13.5418925	6.250104229	0	2.083368076	0	0.985105789	0	0	0	4.166736153	0.813734246	12.03582745	4.166736153	0	7.291788268	0
Masitinib	1423.088796	1260.573235	201.3020253	92.66332326	1546.232401	2775.720178	101.8910485	86.07594382	77.58546965	344.334317	417.3333501	414.1973112	150.6386333	57.17854818	105.2815229	152.1061261	384.6915111	1412.423604	281.7013526	1092.681387	1022.177427	853.6279067	10331.73145	1286.128005	1233.520361	513.0644849	855.5004763	1244.250448	902.2902274	535.4890384	19.17607159	87.44873228	30.54941765	635.1044531	303.5037594	50.81015628	295.3218853	33.16218741	17.59105538	62.59094056	27.32294476	39.91246357	201.7675558	50.10792801	825.6292376	208.7368034	54.59925906	361.7560175	115.5242655
Medroxyprogesterone_acetate_(MPA)	131.3913044	142.0377279	32.53124065	5.662275092	183.259113	305.1281267	17.52272067	8.051617006	8.057488118	56.27735001	67.64020266	66.9305076	14.41549541	7.359615643	8.50984893	13.14257539	35.56459048	135.8404005	24.80299181	156.2058991	119.7394557	127.0055317	1168.522168	175.5489037	148.9334179	95.29889817	125.8436834	152.5792368	118.1081801	54.12577641	2.735655537	4.980342995	0.886524823	110.4974934	50.45745484	11.96006721	28.03249892	2.810567735	2.428788047	4.517678096	3.256851669	6.902300771	37.00404973	12.26036816	127.8294392	35.40067055	6.056551248	58.75980493	8.707865958
Megestrol	4.307726718	1.259155885	3.897200955	0	20.61081342	25.82584405	0	0	0	1.114827202	0	0.177861796	0	0.243664717	0	1.172795783	0.491441328	10.52578829	1.662839126	6.022051936	7.947300429	13.92677309	90.11721339	15.49544347	6.356013059	5.071197936	1.796398678	1.953867389	7.248050016	5.677002001	0.309214595	0	0	0	0	0	0	0	0	0	0	0	0.227531286	3.571546328	5.374249769	0	0	0	0
Methyltestosterone	42.27741055	44.62014291	16.2868338	1.083456063	55.13481714	113.860254	4.166736153	3.870797702	1.773925183	16.13647249	16.63046735	17.29756566	4.470367503	4.371857022	2.730924114	9.381198024	13.06579424	35.30952392	15.72206412	54.78998348	37.47866801	43.39607018	438.6490184	52.25106505	54.57668578	21.2191711	39.26988868	47.92263493	40.85766081	36.73692775	0.309214595	3.779099354	0	27.86196614	13.63786489	1.308353282	8.72971375	1.124227094	0.661238751	3.466873684	0.985767551	1.895688816	11.87790142	7.479071349	37.32203596	9.811307415	5.851804851	14.58357654	2.471507991
Midostaurin	247.5650654	269.0750762	38.52093402	17.60323076	303.0892597	601.1027724	19.34768425	20.4711816	15.22249264	65.98910484	106.4053626	80.84694457	23.72303994	16.6490136	32.27956732	15.70769729	85.31749261	253.4008069	80.29670861	205.7952824	206.4778255	194.2087495	2517.444498	251.0008628	292.3834789	123.9992822	229.6894942	297.1970307	168.5926898	100.9370443	3.5163713	21.62320109	1.689737674	125.2147376	57.05415092	26.71229197	81.25824581	7.780519253	2.486380966	21.73819442	4.826412596	10.17245797	39.80363414	15.48476859	152.8031426	45.7373394	19.59432425	70.85687415	10.13471461
Mogamulizumab	93.18127093	99.37534385	13.6513337	3.5409321	118.7856314	207.0418297	6.847475795	6.724731148	6.033789777	20.35707691	29.27345508	25.35817421	10.21263993	4.128192305	6.225136841	4.671953971	20.69839007	100.2102628	21.27036946	90.27890334	65.77980009	78.28622114	858.456382	91.9863427	74.17004631	39.82742877	62.66175734	110.4122848	52.49426871	37.53494473	1.475327219	3.378684807	0	40.90602512	21.03341771	6.239187597	22.33980652	2.810567735	0	14.48809272	0.724329642	1.895688816	15.77801308	19.05904017	62.37042906	13.97804357	14.72187007	22.30086359	3.095143787
Moxetumomab_pasudotox	15.24405512	9.102743386	1.524017273	0.510464523	18.34199926	22.58744373	0	1.389318337	0.220312844	0	1.566670681	0.674210342	2.724454239	0	0.666666667	1.247271593	0.200320513	10.89364166	0.736322804	5.144588772	9.962895556	7.765966143	128.5881708	9.282053632	7.380428143	1.311466357	9.233967261	6.850596671	4.310715793	4.110242163	0	1.572327044	0	0	0	0.670690812	1.221001221	0	0	0	0	0	0	0	3.858632828	1.777777778	4.381442764	0	2.648420536
Necitumumab	684.9475282	560.8825339	104.1851781	51.00866068	732.0246149	1345.371472	34.08381856	35.54595543	36.3361684	115.1195658	196.829854	132.3146459	101.9158058	30.31915735	71.41624007	54.05008527	177.9748131	678.8488217	176.5144547	364.0356662	433.9669517	350.8394598	5298.183109	602.4631441	633.2298807	249.9477273	392.7435916	591.5970323	365.0493574	234.5970207	6.956470454	25.57232711	10.58673472	208.7947469	99.37739659	24.2884569	172.3331013	17.36848077	9.842832571	40.14843396	13.00233742	19.94555589	65.30247941	24.71080224	296.1051821	71.16739913	22.53118091	125.9062971	34.45651068
Nilotinib	490.3186037	591.2899143	103.7199995	44.88274106	578.7574368	1270.256968	72.44282266	29.12893181	28.34801139	238.5211907	298.8430172	285.9828059	52.02296595	25.49814412	59.87656518	32.59298722	306.2443147	599.5414666	144.4300052	638.7439979	539.5636918	482.1327917	4978.898238	612.1077784	677.8596512	338.4803654	494.8297923	684.3129751	423.6405001	187.9352552	5.589815222	31.27067002	6.122361788	464.3856864	217.8729667	21.93546405	193.9949694	13.64858828	11.09635237	34.06905011	9.970693298	15.78932242	146.1139865	20.63475228	487.1471849	151.1296348	25.46231548	258.2919393	22.60743054
Nilutamide	42.27741055	44.62014291	16.2868338	1.083456063	55.13481714	113.860254	4.166736153	3.870797702	1.773925183	16.13647249	16.63046735	17.29756566	4.470367503	4.371857022	2.730924114	9.381198024	13.06579424	35.30952392	15.72206412	54.78998348	37.47866801	43.39607018	438.6490184	52.25106505	54.57668578	21.2191711	39.26988868	47.92263493	40.85766081	36.73692775	0.309214595	3.779099354	0	27.86196614	13.63786489	1.308353282	8.72971375	1.124227094	0.661238751	3.466873684	0.985767551	1.895688816	11.87790142	7.479071349	37.32203596	9.811307415	5.851804851	14.58357654	2.471507991
Nimotuzumab	684.9475282	560.8825339	104.1851781	51.00866068	732.0246149	1345.371472	34.08381856	35.54595543	36.3361684	115.1195658	196.829854	132.3146459	101.9158058	30.31915735	71.41624007	54.05008527	177.9748131	678.8488217	176.5144547	364.0356662	433.9669517	350.8394598	5298.183109	602.4631441	633.2298807	249.9477273	392.7435916	591.5970323	365.0493574	234.5970207	6.956470454	25.57232711	10.58673472	208.7947469	99.37739659	24.2884569	172.3331013	17.36848077	9.842832571	40.14843396	13.00233742	19.94555589	65.30247941	24.71080224	296.1051821	71.16739913	22.53118091	125.9062971	34.45651068
Nintedanib_(BIBF_1120)	1134.672214	916.1937966	144.1950378	83.89492458	1226.479391	2122.50827	45.64011046	67.98298166	66.79712116	153.7383692	242.708453	192.6138225	117.4694537	53.26328713	113.3120292	126.453081	212.7805468	1071.703644	237.8858598	621.6382397	683.2545195	532.741646	8212.750119	896.2402346	913.321148	305.9297433	595.2968501	862.061871	649.0432314	443.1554812	14.52780211	78.46544226	22.96633342	265.2795848	125.5154699	46.88377195	223.7679266	30.29709235	12.92592999	64.40488839	23.85043633	29.40117982	89.08161871	46.18361045	442.2755634	94.93451573	44.88173895	161.6835248	96.21567119
Niraparib	24.72555133	28.61900893	6.712253344	2.436197522	36.66534813	86.3824109	4.764107718	0	5.516588061	13.87330208	18.37667794	15.19759578	2.766247054	0.487329435	3.500737937	1.483585698	13.15616584	31.12714133	16.65023304	31.32243744	34.22743509	25.53396571	364.111117	33.10821252	51.70574108	21.49143025	37.98723029	41.40148813	26.45384083	12.08836896	0.309214595	1.54012654	0	27.08378499	12.50020846	0	13.29269135	3.86244358	0.985105789	1.877934272	0.593610688	0	8.333472306	1.842540831	28.22960904	8.333472306	0	16.9358576	1.247271593
Nivolumab_(BMS-936558)	7.960465399	7.101035138	0.762008637	0	10.01661109	7.312296015	0	0	0	0	0.925925926	0	0.249875062	0	0	0.623635797	1.660551346	6.532169341	0.969377724	2.770083102	3.780063182	0.624219725	36.95355262	7.520049317	3.67736439	0.341646737	1.244946763	1.303242627	2.9190086	2.216066998	0	0	0	0	0	0	0.881834215	0	0	0	0	0	0	0	1.527225768	0	0	0	0.623635797
Obinutuzumab	1.280489868	1.825559069	0	0.510464523	3.927196908	2.516905788	0	0	0	0	1.566670681	0	0	0	0	0	0	1.6553454	0	2.37450567	7.480208741	3.123493457	34.37061268	0	3.597411107	0.290486565	3.092473858	2.234604568	1.183167847	0	0	0.393081761	0	0	0	0.670690812	1.221001221	0	0	0	0	0	0	0	0.403551251	0.888888889	2.50483005	0	0
Ofatumumab	1.280489868	1.825559069	0	0.510464523	3.927196908	2.516905788	0	0	0	0	1.566670681	0	0	0	0	0	0	1.6553454	0	2.37450567	7.480208741	3.123493457	34.37061268	0	3.597411107	0.290486565	3.092473858	2.234604568	1.183167847	0	0	0.393081761	0	0	0	0.670690812	1.221001221	0	0	0	0	0	0	0	0.403551251	0.888888889	2.50483005	0	0
Olaparib	24.72555133	28.61900893	6.712253344	2.436197522	38.03635433	92.58580112	4.764107718	0	5.516588061	14.75513629	18.37667794	15.19759578	2.766247054	0.487329435	3.500737937	1.483585698	13.15616584	31.12714133	16.65023304	31.32243744	34.86600469	25.53396571	387.1545127	33.59412117	53.12727244	21.49143025	40.7482371	41.40148813	26.45384083	15.03786591	0.309214595	3.08025308	0	27.08378499	12.50020846	0	13.29269135	3.86244358	0.985105789	1.877934272	0.593610688	0	8.333472306	1.842540831	28.22960904	8.333472306	0	16.9358576	1.247271593
Olaratumab	460.7130828	444.7092829	80.88598391	40.52746809	532.356591	1076.990349	33.25048523	30.14277077	28.15144488	110.6394005	181.2562734	128.1101304	51.69776503	25.55378787	62.70706447	33.51135029	143.9456172	499.676191	139.1625418	322.7636403	359.3048265	296.2747098	4300.934602	454.5563574	517.4877241	219.8865558	354.1486875	528.7359447	291.8514562	184.8749167	4.506391603	23.26924786	5.235836965	207.4787799	99.37739659	27.98283138	150.6922275	12.56053681	4.079195736	35.83894461	11.17937518	15.55275862	65.93259913	21.52005402	256.5133223	70.77281637	19.8521523	122.9203025	23.85470213
Osimertinib	684.9475282	560.8825339	104.1851781	51.00866068	732.0246149	1345.371472	34.08381856	35.54595543	36.3361684	115.1195658	196.829854	132.3146459	101.9158058	30.31915735	71.41624007	54.05008527	177.9748131	678.8488217	176.5144547	364.0356662	433.9669517	350.8394598	5298.183109	602.4631441	633.2298807	249.9477273	392.7435916	591.5970323	365.0493574	234.5970207	6.956470454	25.57232711	10.58673472	208.7947469	99.37739659	24.2884569	172.3331013	17.36848077	9.842832571	40.14843396	13.00233742	19.94555589	65.30247941	24.71080224	296.1051821	71.16739913	22.53118091	125.9062971	34.45651068
Paclitaxel	479.6900943	470.9837844	64.14820729	32.99070224	563.5037286	975.3334938	36.57915154	25.85325195	20.24589405	114.6895806	182.2599975	129.6259174	40.19667977	16.63842151	46.47026097	41.98283234	122.2659063	483.9719098	117.926022	374.0703278	365.0819929	357.6798637	4182.518659	471.2521976	470.1243139	192.2216347	338.4199865	452.3883932	281.141566	206.1845183	6.244571426	15.9533912	6.205673759	218.7641439	104.0834939	32.65858085	132.3816045	8.989672344	5.669460088	28.52858848	8.834034384	22.47321221	68.16757436	33.29991946	296.4123571	71.59050663	18.62467956	124.7158874	29.91148305
Palbociclib	115.8765326	129.4744469	24.37857171	6.833744116	124.6586964	243.3653346	17.02575175	7.325199864	11.62122956	68.61463917	53.78745728	55.75085186	21.02009447	6.562215456	13.29398849	8.918257279	93.00261367	106.355197	13.98887574	124.5956898	104.340476	90.81147163	951.0023206	153.9071239	111.493516	63.58979374	88.55012283	126.3396099	84.41274082	45.62548711	0	6.169474431	0.886524823	95.92600164	43.95265597	3.085030194	25.56032049	0.562113547	3.598252038	5.843479475	2.08022856	4.267513656	32.16680658	1.109074506	105.3566516	29.56173583	0.913854207	55.32158121	4.365450577
Panitumumab	684.9475282	560.8825339	104.1851781	51.00866068	732.0246149	1345.371472	34.08381856	35.54595543	36.3361684	115.1195658	196.829854	132.3146459	101.9158058	30.31915735	71.41624007	54.05008527	177.9748131	678.8488217	176.5144547	364.0356662	433.9669517	350.8394598	5298.183109	602.4631441	633.2298807	249.9477273	392.7435916	591.5970323	365.0493574	234.5970207	6.956470454	25.57232711	10.58673472	208.7947469	99.37739659	24.2884569	172.3331013	17.36848077	9.842832571	40.14843396	13.00233742	19.94555589	65.30247941	24.71080224	296.1051821	71.16739913	22.53118091	125.9062971	34.45651068
Panobinostat	145.0155801	221.9481357	73.55927223	10.07198267	178.5990195	507.6861739	54.74249642	5.014756216	9.045162508	170.7224807	169.2678481	198.9258903	14.98872876	2.962576959	7.697321475	14.63668539	139.4247795	136.0408559	35.62674681	408.2122196	260.5576145	303.1813303	1708.436101	265.644479	267.3359498	180.1775244	240.8384133	318.4899905	224.8927464	79.67850095	3.391546451	4.343028368	0.886524823	328.0031597	157.3422931	16.48814496	62.70296724	4.472548757	8.41418186	3.70370728	4.497041854	5.827088085	119.0854656	0.714995934	309.0254333	100.8905566	2.134344168	177.0782042	3.306444708
Pazopanib	640.4622006	556.9857235	96.41028387	50.45119349	683.8272121	1349.259635	35.33385331	38.73609603	37.22495603	118.9103825	201.7635518	142.8041507	70.07510491	32.53920171	78.35970145	63.60212294	166.1509034	637.4461224	155.1696322	391.5567824	452.5500041	360.8061473	5275.442362	575.5309525	620.255504	245.9745483	411.8007793	610.2970104	376.3520674	244.7657384	6.210306337	24.89609115	8.781936256	221.398439	105.6275008	37.38365276	178.7250894	16.24425367	8.374923903	47.16420402	13.94061098	18.63841008	72.56584382	24.99717108	302.3879341	77.50649582	27.91773741	137.2476642	41.31650444
Pembrolizumab	7.960465399	7.101035138	0.762008637	0	10.01661109	7.312296015	0	0	0	0	0.925925926	0	0.249875062	0	0	0.623635797	1.660551346	6.532169341	0.969377724	2.770083102	3.780063182	0.624219725	36.95355262	7.520049317	3.67736439	0.341646737	1.244946763	1.303242627	2.9190086	2.216066998	0	0	0	0	0	0	0.881834215	0	0	0	0	0	0	0	1.527225768	0	0	0	0.623635797
Perifosine	912.1825881	752.5164679	126.1876826	48.7290273	911.643242	1789.122923	49.23452044	54.80594384	51.30617994	168.0794365	220.8535428	199.969606	88.95978633	41.86758727	77.20085815	136.7924722	138.6958608	866.5704461	169.237592	567.0614519	562.1718574	438.6707623	6337.907592	792.9298071	873.1193427	268.3403302	497.9141151	712.4879047	490.2380417	386.5691795	11.19576766	41.24515263	14.59197084	303.759216	146.3532222	22.96758615	160.2286612	20.63677958	8.409644537	41.55739322	24.91591097	29.11059122	97.69041218	34.50210878	480.7626382	105.7279512	32.77314329	182.303663	108.899688
Pertuzumab	347.6956901	317.8213926	63.06025378	23.49086979	396.90026	747.6340577	21.82270835	24.1105841	18.97503403	75.61361272	115.4236248	89.87088212	41.17542539	20.00803851	35.01853636	29.50090621	115.4197693	341.2450281	125.6870486	225.837968	243.6125278	217.6603792	2903.323124	319.2639956	351.5677573	136.9688561	249.4063689	342.5044492	211.5886569	132.7719733	3.20509478	21.23011933	6.15411061	139.0369778	63.5606654	24.02952872	91.54527066	8.3426328	3.57433503	23.00286952	6.93227325	11.67462393	43.9703703	15.12745036	182.9547645	48.715244	18.37433401	80.35243993	18.86561576
Pomalidomide	289.015821	302.345912	46.31178849	16.14338579	417.3899681	667.8801737	27.89230059	19.11137221	17.28662047	77.03192962	121.9755477	95.69583889	25.20441967	12.66767246	26.38556644	25.30724848	72.21348144	299.5837054	103.4765833	275.4539634	235.9447017	218.9653304	2922.067136	327.0807282	317.2439291	133.339322	261.9753285	305.1024686	189.0655241	110.8397957	2.840893375	12.51670272	3.118711291	151.7870211	71.83649784	17.22154078	80.06184789	10.11389944	1.52807227	15.77886664	9.424593342	9.346803207	53.64231003	15.74844559	197.4364972	53.37317806	18.216765	85.53881371	18.19216484
Ponatinib	146.4124681	252.1871076	43.03097131	11.40179873	163.8231219	462.1992474	50.5982054	9.035988657	8.600639748	165.5345727	162.7656731	198.8799871	19.68388459	7.28967311	14.89716219	12.10457779	194.0808171	209.9573855	22.12681894	397.4132534	268.1179737	264.041402	1517.576272	269.8307575	255.8688752	177.1824014	209.004696	303.1419006	212.7053808	52.82624209	1.651566394	10.10451023	2.659574468	325.4574119	152.2856065	1.600309803	67.70110142	8.166057346	14.94871269	7.618822221	2.786704297	6.95297575	101.6451878	2.493952721	306.0995052	101.2851393	1.272704183	176.5351403	8.107265357
Ramucirumab_(Cyramza)	467.0955755	401.5338128	73.7489974	44.31329895	520.5097016	1078.357974	19.76124918	28.63508348	28.30613714	70.5834177	143.1932603	86.68798905	44.81420229	23.59582709	61.29725439	43.77062168	127.4847271	500.3987288	139.0468029	279.4591337	335.1065252	267.7631819	4334.761781	417.1852351	497.0686586	181.6644741	320.2277953	447.3772624	272.7991253	185.8926899	3.393964157	18.73610367	7.092198582	125.521631	61.07355837	18.44948795	155.4090899	13.02884964	3.547602352	40.39222802	8.889544455	14.96083789	40.86088898	21.25317798	192.34897	45.36376936	21.36420936	80.29314232	24.29876088
Regorafenib	1425.037118	1226.65829	187.2569253	83.3027411	1460.37314	2735.278611	107.533375	63.54234424	66.46596081	345.8676092	433.633257	408.1353222	129.3926291	42.64525618	99.67585415	145.0477449	360.7362856	1357.951851	232.4677034	1262.102779	1002.092998	874.49077	9825.084538	1375.982663	1189.577344	527.0933053	832.4654812	1268.568768	827.7767236	469.7480431	20.00120268	62.0055154	22.0798086	659.3956308	310.1970462	59.35272399	281.1664612	30.57195231	24.54394911	69.36097949	22.34924262	45.4780881	210.3585442	60.82251047	894.7666106	217.4368683	50.5483151	379.3512302	102.4980995
Ribociclib	115.8765326	129.4744469	24.37857171	6.833744116	124.6586964	243.3653346	17.02575175	7.325199864	11.62122956	68.61463917	53.78745728	55.75085186	21.02009447	6.562215456	13.29398849	8.918257279	93.00261367	106.355197	13.98887574	124.5956898	104.340476	90.81147163	951.0023206	153.9071239	111.493516	63.58979374	88.55012283	126.3396099	84.41274082	45.62548711	0	6.169474431	0.886524823	95.92600164	43.95265597	3.085030194	25.56032049	0.562113547	3.598252038	5.843479475	2.08022856	4.267513656	32.16680658	1.109074506	105.3566516	29.56173583	0.913854207	55.32158121	4.365450577
Rigosertib	27.0712735	16.32672586	25.87224396	0	41.27834586	117.3068116	2.083368076	0.825082508	2.088801594	20.69588857	7.028920429	7.72794572	4.590967942	1.312411943	3.426166296	5.542948203	35.63668433	41.71323141	1.029633255	31.14585474	35.13751806	29.01256252	470.2285336	31.14193571	43.72680745	10.33160344	21.99194005	25.16506718	27.83931341	31.31825839	1.392638214	6.534871951	0.459136823	13.5418925	6.250104229	0	2.862184276	0	0.827129859	0	0.367107195	1.109079464	4.705787108	0.26816841	33.31484018	4.166736153	0.26816841	7.291788268	0.623635797
Rituximab	1.280489868	1.825559069	0	0.510464523	3.927196908	2.516905788	0	0	0	0	1.566670681	0	0	0	0	0	0	1.6553454	0	2.37450567	7.480208741	3.123493457	34.37061268	0	3.597411107	0.290486565	3.092473858	2.234604568	1.183167847	0	0	0.393081761	0	0	0	0.670690812	1.221001221	0	0	0	0	0	0	0	0.403551251	0.888888889	2.50483005	0	0
Romidepsin	145.0155801	221.9481357	73.55927223	10.07198267	178.5990195	507.6861739	54.74249642	5.014756216	9.045162508	170.7224807	169.2678481	198.9258903	14.98872876	2.962576959	7.697321475	14.63668539	139.4247795	136.0408559	35.62674681	408.2122196	260.5576145	303.1813303	1708.436101	265.644479	267.3359498	180.1775244	240.8384133	318.4899905	224.8927464	79.67850095	3.391546451	4.343028368	0.886524823	328.0031597	157.3422931	16.48814496	62.70296724	4.472548757	8.41418186	3.70370728	4.497041854	5.827088085	119.0854656	0.714995934	309.0254333	100.8905566	2.134344168	177.0782042	3.306444708
Rucaparib	24.72555133	28.61900893	6.712253344	2.436197522	36.66534813	86.3824109	4.764107718	0	5.516588061	13.87330208	18.37667794	15.19759578	2.766247054	0.487329435	3.500737937	1.483585698	13.15616584	31.12714133	16.65023304	31.32243744	34.22743509	25.53396571	364.111117	33.10821252	51.70574108	21.49143025	37.98723029	41.40148813	26.45384083	12.08836896	0.309214595	1.54012654	0	27.08378499	12.50020846	0	13.29269135	3.86244358	0.985105789	1.877934272	0.593610688	0	8.333472306	1.842540831	28.22960904	8.333472306	0	16.9358576	1.247271593
Ruxolitinib	348.7260005	236.131744	37.75433834	9.604805365	306.9566615	572.0315322	10.3839915	13.81253347	12.37391762	34.44393583	53.20691388	37.55120751	29.26686546	10.28069686	22.02224981	48.82826245	48.45981023	301.1739733	64.9170535	182.3950186	188.4720856	152.6768009	2183.738481	218.040575	194.7409387	74.14994349	148.8309497	226.1710069	159.4145768	112.1162018	3.304247608	12.18069909	1.773049645	56.44464686	28.82583286	14.44981724	60.8054969	5.370057509	3.16569505	19.22912975	4.253969229	7.31874801	21.97406258	18.26358022	121.1111057	20.90608648	19.91306286	31.41344051	40.51329159
Selumetinib	1010.047207	727.4597269	104.0758404	47.99549338	1042.127408	1644.435507	39.20933608	46.98025612	48.23664014	135.2025513	196.9362061	143.0159815	94.27297486	28.60506386	67.7683432	99.48698751	135.6974584	924.8845791	143.5520579	485.3995593	504.2442723	413.8052659	5999.823403	824.1649742	694.893015	248.7319539	406.3211881	725.994894	437.9830433	300.6299628	13.49700068	36.60939749	14.98761001	237.1831354	112.6176697	24.21847431	147.9063985	22.87698456	9.740927216	45.97897217	15.68164336	27.91947463	74.87779405	34.80481191	457.293064	81.00688671	23.55722518	146.3980832	74.45752389
Siltuximab	431.9485578	410.6681129	73.21218061	32.03484884	530.3661732	979.011332	22.70039332	28.31596191	23.73096706	75.88854654	161.2284479	89.34219457	35.21926222	17.9612698	52.00191229	29.32643157	136.2598037	443.4339637	148.8655151	319.4571365	326.6512942	327.0879244	4537.380695	403.5108768	501.0343531	172.7522775	348.7989463	442.3934917	245.4636108	167.2221855	3.590515819	19.74847284	3.118711291	139.3778827	65.58639361	28.65299083	137.3449731	10.2182819	3.525493694	34.81017276	7.21166023	13.34107033	44.5232368	36.61966814	192.661374	49.93017155	25.95507863	83.10922404	19.9333103
Sonidegib_(LDE225)	0.506677491	6.157534951	0.143184422	0	6.517023441	23.7180963	0	0	0	0.734214391	0	0	0	0	1.877934272	0.623635797	0.725426052	14.38112705	0	0.258799172	3.377485979	2.981724954	60.55291011	0	1.826327998	3.844522852	3.90807526	2.516200295	0.770668042	2.57867001	0.61842919	0	0	0	0	0.483091787	0	0	0	0	2.606873567	1.4781966	0	0	0	0	0	0	0.623635797
Sorafenib	1172.200916	883.1398915	135.3643205	64.61518604	1173.649041	1998.284343	48.43143333	56.25459975	57.01926716	170.0205221	257.0097164	192.0175828	115.7428424	41.33284423	91.78093798	116.7019705	211.3162642	1076.604562	201.0313687	596.7155634	641.5411548	522.1023228	7641.053517	956.1819507	901.6983726	326.93003	553.7485554	932.8776334	576.4862821	376.8833257	14.2181407	47.80388765	15.87413484	304.3318797	143.1281262	42.2971389	209.7633355	24.63978125	12.66744661	60.73698873	17.6460161	33.2375575	99.49815424	50.68302278	513.6256736	105.4098884	41.10877314	187.4124542	79.26969772
Sunitinib	670.8374645	580.7387925	100.4808174	51.1609167	719.6528435	1385.028856	35.33385331	40.55907818	37.22495603	118.9103825	204.6738034	143.4330815	72.63571097	32.53920171	78.75278321	64.84939454	166.8052227	660.2855228	157.2131664	410.5191492	464.3301202	375.7649711	5440.838972	603.0771873	631.6617911	247.6351542	419.5904557	627.111957	383.1303239	251.192972	6.210306337	24.89609115	8.781936256	221.398439	105.6275008	38.05434357	182.0196068	16.24425367	8.374923903	50.5657574	15.72970472	19.53446742	72.56584382	28.02747411	308.6775306	78.39538471	32.92739751	137.2476642	43.96492498
Tamoxifen	129.0714538	140.778572	28.86157098	5.662275092	172.0426808	290.3661374	17.52272067	8.051617006	8.057488118	55.16252281	67.64020266	66.9305076	14.41549541	7.115950925	8.50984893	12.75164346	35.27346967	130.8702551	24.80299181	154.1815416	117.4943251	121.4143233	1130.749994	173.9017508	146.112359	94.25078364	125.8436834	150.6253694	116.5202081	51.3304825	2.426440942	4.980342995	0.886524823	110.4974934	50.45745484	11.96006721	28.03249892	2.810567735	2.428788047	4.517678096	3.256851669	6.902300771	37.00404973	12.26036816	122.4551895	35.40067055	6.056551248	58.75980493	8.707865958
Tecemotide_(Emepepimut-S_L-BLP25)	25.05636147	19.1528908	3.955170073	3.000874476	35.77517213	66.00634704	0	2.220609731	2.110301165	0.782674479	3.67642389	1.622885323	2.555905233	1.880550117	2.537335272	2.142125414	8.580889929	25.38117098	13.87851094	11.59373618	21.69856384	8.112042492	254.3755365	21.55814849	30.85391491	4.379525048	15.95127769	22.97051847	13.04693101	11.27642933	0.25892818	0	0.886524823	1.745127369	0	1.166866916	8.118167253	0.319284802	0.171732784	1.11069992	0.41956933	0.999631468	0.859426069	1.803120326	5.880953405	1.008233432	4.038069303	1.926782274	1.247271593
Temozolomide	4.8870437	7.536346839	0	0	4.141291642	18.7658286	2.083368076	0	1.984126984	7.325624286	6.851788947	7.68772879	0	0	0	0	0	1.136634031	0.122279286	15.71179267	8.598511719	10.90065232	58.96375877	8.46157543	9.220773739	6.250104229	10.88874386	7.746540428	7.774159517	2.786487683	0	1.54012654	0	13.5418925	6.250104229	0	2.083368076	0	0.985105789	0	0	0	4.166736153	0.813734246	12.03582745	4.166736153	0	7.291788268	0
Temsirolimus	305.1768271	306.3076704	55.07593897	19.13341785	350.2788186	642.2647344	19.76124918	26.46154852	19.8879069	67.38460539	84.36540383	87.75728714	32.3808672	23.63742425	28.48105507	43.80870356	60.8146948	318.5649019	77.99169668	219.9572016	218.9655097	161.5834115	2455.869736	313.0725138	341.9083447	105.6504226	177.0788823	277.8420475	195.2067943	170.8973547	4.811884792	17.7494517	5.694973788	124.2536278	59.33725594	10.16309496	59.34429982	11.15320053	3.511240514	16.50248512	18.1347003	14.57906863	40.70465092	21.1165412	186.4678785	43.80343275	17.34102282	72.63515287	30.0680249
Thalidomide	752.4165696	709.3344242	143.0522828	53.32390284	945.2957908	1648.117935	58.6970381	40.7235636	39.71881928	175.3517157	279.4017642	201.7782666	67.5660905	28.8541179	73.1827266	68.22367129	168.3232316	762.9406751	190.6586441	627.9964816	568.0786231	510.7375765	6645.013447	760.6707242	740.8935983	316.7575004	548.1457907	704.5214504	441.7246652	276.8363988	9.629031506	28.7352958	9.241073078	331.1291149	158.4572757	42.74348609	194.8029497	19.54458371	7.62979983	47.29542179	17.34014448	28.86317172	106.5654811	38.46363848	504.1762569	112.0461565	29.6595782	194.0240432	48.33037555
Tivantinib	725.4277426	667.8723112	123.5890345	62.58473134	892.3920253	1740.620223	36.96083743	45.92582667	43.1880552	124.4259272	221.9500157	144.8475918	78.93582122	30.84808807	80.53778349	70.19205514	220.1691755	846.9393612	191.1378569	459.8898207	523.7542806	444.2460587	6574.856302	665.7371857	749.2122818	270.7812411	481.6750575	670.2127383	429.8024345	315.4810958	14.7885642	32.88532133	15.20810283	223.4693936	111.8836178	30.64804409	194.6018126	22.4066961	8.734448002	55.72188619	17.02877825	28.15848532	75.16751126	44.88526363	328.7960581	80.00033607	36.96176704	138.701437	48.97075743
Tivozanib	480.3882025	414.0015471	80.22741286	44.54987335	539.3026713	1113.139612	21.84461726	28.98729229	28.30613714	76.91748498	149.784545	95.52272578	45.95949274	24.08315652	61.29725439	47.28312453	131.3395561	510.2978937	143.1401241	298.2434686	348.0323513	279.8834144	4450.52118	426.91868	513.2582641	189.8845615	335.2545188	468.8476199	290.1620888	194.6653429	4.788664296	18.73610367	7.092198582	139.0635235	67.3236626	22.81455324	157.492458	13.02884964	4.374732211	42.60611492	9.439832739	14.96083789	45.02762513	21.70000551	209.2993059	50.4193944	22.85286773	89.23471762	26.16966827
Toremifene	128.8711333	140.778572	28.6340397	5.662275092	168.7779781	286.2808705	16.66694461	8.051617006	8.057488118	55.16252281	67.64020266	66.9305076	14.41549541	7.115950925	8.50984893	12.75164346	35.07314916	130.0144791	24.80299181	154.1815416	117.2603249	121.4143233	1127.222945	173.7014303	146.112359	94.25078364	125.4432688	150.6253694	115.0081495	51.3304825	2.426440942	4.579928448	0.886524823	110.0970789	50.45745484	11.55965266	28.03249892	2.810567735	2.0283735	4.517678096	3.256851669	6.902300771	36.77651844	12.26036816	122.4551895	35.40067055	6.056551248	58.75980493	8.707865958
Trametinib_(Mekinst)	1010.047207	727.4597269	104.0758404	47.99549338	1042.127408	1644.435507	39.20933608	46.98025612	48.23664014	135.2025513	196.9362061	143.0159815	94.27297486	28.60506386	67.7683432	99.48698751	135.6974584	924.8845791	143.5520579	485.3995593	504.2442723	413.8052659	5999.823403	824.1649742	694.893015	248.7319539	406.3211881	725.994894	437.9830433	300.6299628	13.49700068	36.60939749	14.98761001	237.1831354	112.6176697	24.21847431	147.9063985	22.87698456	9.740927216	45.97897217	15.68164336	27.91947463	74.87779405	34.80481191	457.293064	81.00688671	23.55722518	146.3980832	74.45752389
Trastuzumab	347.6956901	317.8213926	63.06025378	23.49086979	396.90026	747.6340577	21.82270835	24.1105841	18.97503403	75.61361272	115.4236248	89.87088212	41.17542539	20.00803851	35.01853636	29.50090621	115.4197693	341.2450281	125.6870486	225.837968	243.6125278	217.6603792	2903.323124	319.2639956	351.5677573	136.9688561	249.4063689	342.5044492	211.5886569	132.7719733	3.20509478	21.23011933	6.15411061	139.0369778	63.5606654	24.02952872	91.54527066	8.3426328	3.57433503	23.00286952	6.93227325	11.67462393	43.9703703	15.12745036	182.9547645	48.715244	18.37433401	80.35243993	18.86561576
Trebananib	286.6577985	260.6168214	42.84743566	19.18958517	303.5271851	505.9495481	11.27261644	17.20468767	10.12331813	38.23885803	94.57011427	44.22671511	20.14246916	9.211793888	31.42804033	18.096513	64.77224581	284.2011183	55.70067935	167.8893348	173.2163857	221.5786289	2443.3612	242.3309055	241.418365	83.25340635	172.027591	236.8966275	129.2830608	103.980368	1.325190313	7.35835443	2.659574468	69.12256428	33.53362617	10.86628276	84.51434183	4.565115217	4.070415513	23.77613667	2.181396027	6.256893	22.1059454	31.01978012	104.087894	22.90046209	12.88178413	39.79008272	12.44968074
Vandetanib	746.9858004	590.3286314	108.451191	55.87674262	774.1015527	1456.218349	34.08381856	38.94353323	40.07566684	115.2169848	198.0050041	149.9429345	105.2830886	34.75143376	75.61729852	71.69495539	178.3280044	720.8668958	184.2494363	390.6420735	465.4951884	361.3443872	5665.52975	641.8810956	691.1306903	252.4020565	408.0484319	618.5112232	415.7505993	283.6720355	6.956470454	25.57232711	13.24630919	209.1725135	99.37739659	24.2884569	180.0064286	18.49270786	10.93078663	43.62699595	17.21275642	21.55543985	66.66451875	25.5335079	312.6155979	71.95656465	24.59694982	129.7598617	43.16437663
Veliparib	5.059017073	9.204288061	1.900791688	1.083456063	8.097302427	25.7187577	2.083368076	0	2.648137608	6.250104229	9.18833897	7.509866994	0.645540332	0.243664717	1.594896332	0.623635797	9.305631755	8.087525526	6.807766043	12.87558383	12.65510454	10.64530166	132.8062659	9.51072615	20.32551516	8.927297092	15.65682682	18.15520933	10.29964655	2.921207882	0	0	0	13.5418925	6.250104229	0	6.646345673	0	0	0.938967136	0	0	4.166736153	1.028806584	12.06238915	4.166736153	0	7.291788268	0.623635797
Vemurafenib	598.7902339	477.6125132	70.98770967	25.45914905	613.4548234	1032.447931	27.20609654	32.36576224	27.07241437	92.49411169	141.3798476	103.3514958	50.34555749	23.11453114	46.50778402	43.99255528	96.67824309	588.1700017	102.8253016	307.9444443	319.0533248	273.6509878	3875.392121	545.3301117	465.6339621	172.2677143	291.0448661	480.6721783	265.064574	192.5722301	6.184750618	33.57021674	6.205673759	166.2672961	77.54076603	19.20476685	100.4045433	12.91621796	2.665089958	31.26689849	11.05472215	20.97270615	54.11057663	25.83945937	266.2345681	56.28373804	18.9525389	98.44280532	29.91148305
Venetoclax	389.5580282	379.1322071	53.32430589	22.607861	449.2368225	750.2040348	27.64830767	23.90965036	16.28337807	84.31604686	149.687874	97.64299098	30.29914693	14.68894803	38.2368353	30.02799368	101.5671012	371.7482778	109.305072	290.4384606	285.8729349	299.4929307	3381.248194	374.1945608	378.2541923	146.1380993	283.6986806	362.9063945	211.7641291	148.7429914	2.709007031	15.9533912	2.659574468	164.5965739	75.99772564	24.59914109	116.4295385	7.339507328	2.910712521	26.59200814	4.358349776	11.86530284	51.50062975	32.31675512	211.051302	53.64009037	14.9564943	92.8397349	22.42785348
Vinblastine	572.7512222	498.4179247	74.63004755	39.85689989	711.7580486	1339.857096	48.3541654	26.34727072	32.24934335	153.9051754	193.7877615	163.0785749	51.75517637	13.88321629	47.87417809	67.30420746	146.9012651	546.6224555	146.5264846	529.3500521	461.1658523	414.447449	4510.192231	603.3062452	512.5946982	235.1471123	371.0786281	506.9991872	369.5853156	238.0411638	10.10673082	16.6634887	11.5248227	276.1752441	128.8882056	35.1282496	121.6296766	12.1017333	8.586992624	27.32596284	17.38250337	38.47647747	97.34507608	16.84913564	402.0901545	89.5075483	17.4783427	158.358747	41.93747573
Vincristine	8.118467906	10.38361251	0	7.946643723	26.32795862	63.83437554	0	0	1.263719086	3.87675304	0.617675008	0	1.613032904	0	2.554403569	2.900495023	3.152250109	32.52539659	0.701547176	7.455670169	18.4642373	9.187179737	239.5012491	15.59196224	12.31647245	5.934593954	4.491904655	14.2821932	11.91131263	20.09416488	0.61842919	0	3.546099291	0	0	0	0	0	1.641123628	0	3.070347727	9.608277901	0	0	12.99952244	0	0.377517388	0	0.623635797
Vindesine	8.118467906	10.38361251	0	7.946643723	26.32795862	63.83437554	0	0	1.263719086	3.87675304	0.617675008	0	1.613032904	0	2.554403569	2.900495023	3.152250109	32.52539659	0.701547176	7.455670169	18.4642373	9.187179737	239.5012491	15.59196224	12.31647245	5.934593954	4.491904655	14.2821932	11.91131263	20.09416488	0.61842919	0	3.546099291	0	0	0	0	0	1.641123628	0	3.070347727	9.608277901	0	0	12.99952244	0	0.377517388	0	0.623635797
Vinorelbine	8.118467906	10.38361251	0	7.946643723	26.32795862	63.83437554	0	0	1.263719086	3.87675304	0.617675008	0	1.613032904	0	2.554403569	2.900495023	3.152250109	32.52539659	0.701547176	7.455670169	18.4642373	9.187179737	239.5012491	15.59196224	12.31647245	5.934593954	4.491904655	14.2821932	11.91131263	20.09416488	0.61842919	0	3.546099291	0	0	0	0	0	1.641123628	0	3.070347727	9.608277901	0	0	12.99952244	0	0.377517388	0	0.623635797
Vismodegib	0.506677491	6.157534951	0.143184422	0	6.517023441	23.7180963	0	0	0	0.734214391	0	0	0	0	1.877934272	0.623635797	0.725426052	14.38112705	0	0.258799172	3.377485979	2.981724954	60.55291011	0	1.826327998	3.844522852	3.90807526	2.516200295	0.770668042	2.57867001	0.61842919	0	0	0	0	0.483091787	0	0	0	0	2.606873567	1.4781966	0	0	0	0	0	0	0.623635797
Vorinostat	145.0155801	221.9481357	73.55927223	10.07198267	178.5990195	507.6861739	54.74249642	5.014756216	9.045162508	170.7224807	169.2678481	198.9258903	14.98872876	2.962576959	7.697321475	14.63668539	139.4247795	136.0408559	35.62674681	408.2122196	260.5576145	303.1813303	1708.436101	265.644479	267.3359498	180.1775244	240.8384133	318.4899905	224.8927464	79.67850095	3.391546451	4.343028368	0.886524823	328.0031597	157.3422931	16.48814496	62.70296724	4.472548757	8.41418186	3.70370728	4.497041854	5.827088085	119.0854656	0.714995934	309.0254333	100.8905566	2.134344168	177.0782042	3.306444708
[truncated: 3,751 more columns]
