# Supplementary material for: Pathway Based Analysis of Mutation Data Is Efficient for Scoring Target Cancer Drugs
Source: Front Pharmacol. 2019 Jan 23;10:1. doi: 10.3389/fphar.2019.00001 (PMC6351482; doi:10.3389/fphar.2019.00001)
Supplement: Supplementary Data Sheet 3 — Mutation drug scores for 3800 TCGA tumor samples for 10 versions of drug scoring algorithm. The dataset contains 10 tables that match the 10 methods of drug scoring. [file Data_Sheet_3.ZIP › MDS2.csv]

	TCGA.AG.3881.01	TCGA.63.6202.01	TCGA.MH.A561.01	TCGA.DZ.6135.01	TCGA.BR.8368.01	TCGA.HU.A4GQ.01	TCGA.36.1571.01	TCGA.19.5953.01	TCGA.41.2573.01	TCGA.CZ.4865.01	TCGA.A4.A57E.01	TCGA.02.0114.01	TCGA.81.5911.01	TCGA.27.2526.01	TCGA.BP.4351.01	TCGA.B8.5159.01	TCGA.IN.8663.01	TCGA.AH.6644.01	TCGA.CM.5344.01	TCGA.AA.3685.01	TCGA.EI.6508.01	TCGA.AA.3697.01	TCGA.AA.3977.01	TCGA.AG.A02X.01	TCGA.DC.4745.01	TCGA.AA.3494.01	TCGA.85.6560.01	TCGA.A6.6782.01	TCGA.D5.6533.01	TCGA.G4.6293.01	TCGA.HT.7873.01	TCGA.DU.7294.01	TCGA.DB.A64R.01	TCGA.FG.6690.01	TCGA.DU.6542.01	TCGA.HT.8109.01	TCGA.DU.A5TW.01	TCGA.HT.7877.01	TCGA.HW.8322.01	TCGA.HT.7695.01	TCGA.DU.6393.01	TCGA.QH.A65Z.01	TCGA.HT.8106.01	TCGA.DB.A64P.01	TCGA.DB.A64X.01	TCGA.DU.5851.01	TCGA.06.6701.01	TCGA.HT.7879.01	TCGA.FG.7634.01
Abemaciclib_(LY2835219)	0	0	0	0	0	0	0	0	0	0	0	0	0	0	0	0	0	0	0	0	0	0	26.31578947	19.36799185	0	0	0	0	0	0	0	0	0	0	0	0	0	0	0	0	0	0	0	0	0	0	0	0	0
Afatinib	0	0	0	0	0	0	0	0	0	0	0	0	63.26295251	0	0	0	22.90049068	22.90049068	0	0	0	0	117.7949194	0	0	0	0	0	0	11.45024534	0	0	0	0	0	0	0	0	0	0	0	0	0	0	0	0	0	0	0
Aflibercept	0	0	0	0	0	0	0	0	0	0	0	0	0	0	0	0	0	0	0	0	0	0	0	0	0	0	0	0	0	0	0	0	0	0	0	0	123.6531259	0	0	0	0	0	0	0	0	0	0	0	0
Alectinib	0	0	0	0	0	0	0	0	0	0	0	3.235433944	0	0	0	0	0	0	3.235433944	0	0	0	3.235433944	0	3.235433944	0	0	0	0	0	0	0	0	0	0	0	0	0	0	0	0	0	0	0	0	0	0	0	0
Alemtuzumab	0	0	0	0	0	0	0	0	0	0	0	0	0	0	0	0	0	0	0	0	0	0	0	0	0	0	0	0	0	0	0	0	0	0	0	0	0	0	0	0	0	0	0	0	0	0	0	0	0
Alitretinoin	0	0	0	0	0	0	0	0	0	0	0	0	0	0	0	0	0	0	0	0	3.681078789	0	28.94646532	0	0	0	0	0	0	0	0	0	0	0	0	0	0	0	0	0	0	0	0	0	0	0	0	0	0
Apalutamide_ARN-509	0	0	0	0	0	0	0	0	0	0	0	0	0	0	0	5.473046985	0	0	0	0	0	0	10.94609397	0	0	0	0	0	0	10.94609397	0	0	0	0	0	0	0	0	0	0	0	0	0	0	0	0	0	0	0
Arsenic_trioxide	0	0	0	0	0	0	0	0	0	0	0	0	0	0	0	0	0	0	0	0	0	0	6.557119064	0	0	0	0	0	0	0	0	0	0	0	0	0	0	0	0	0	0	0	0	0	0	0	0	0	0
Atezolizumab	0	0	0	0	0	0	0	0	0	0	0	0	0	0	0	0	0	0	0	0	0	0	0	0	0	0	0	0	0	0	0	0	0	0	0	0	0	0	0	0	0	0	0	0	0	0	0	0	0
Avelumab	0	0	0	0	0	0	0	0	0	0	0	0	0	0	0	0	0	0	0	0	0	0	0	0	0	0	0	0	0	0	0	0	0	0	0	0	0	0	0	0	0	0	0	0	0	0	0	0	0
Axitinib	0	0	0	0	0	14.24711373	0	0	0	0	0	0	0	0	0	0	0	0	0	0	0	0	74.84972925	0	0	0	0	0	30.41443087	0	0	0	0	0	0	0	0	0	0	0	0	0	0	0	0	0	0	0	0
Belinostat	12.90179068	0	57.19023073	0	12.45210728	39.11652281	0	0	0	0	12.29982068	0	0	0	0	0	0	0	0	0	0	57.19023073	67.77438448	0	12.29982068	0	0	24.59964136	0	8.70830612	0	0	0	0	0	0	0	0	0	0	0	0	0	0	0	0	0	0	0
Bevacizumab	0	0	0	0	0	0	0	0	0	0	0	0	0	0	0	0	0	0	0	0	0	0	0	0	0	0	0	0	0	0	0	0	0	0	0	0	0	0	0	0	0	0	0	0	0	0	0	0	0
Bexarotene	0	0	0	0	0	0	0	0	0	0	0	0	0	0	0	0	0	0	0	0	0	0	21.58430774	0	0	0	0	0	0	0	0	0	0	0	0	0	0	0	0	0	0	0	0	0	0	0	0	0	0
Bicalutamide	0	0	0	0	0	0	0	0	0	0	0	0	0	0	0	5.473046985	0	0	0	0	0	0	10.94609397	0	0	0	0	0	0	10.94609397	0	0	0	0	0	0	0	0	0	0	0	0	0	0	0	0	0	0	0
Binimetinib_(MEK162)	0	0	0	0	170.8967851	0	0	0	0	0	0	0	0	0	0	0	0	0	0	0	0	0	170.8967851	0	0	0	0	0	0	0	0	0	0	0	0	0	0	0	0	0	0	0	0	0	0	0	0	0	0
Blinatumomab	0	0	0	0	0	0	0	0	0	0	0	0	0	0	0	0	0	0	0	0	0	0	56.20155039	0	0	0	0	0	0	0	0	0	0	0	0	0	0	0	0	0	0	0	0	0	0	0	0	0	0
Bortezomib	0	0	0	0	71.29232237	151.2173859	0	0	0	0	0	0	0	0	0	0	0	0	0	0	0	0	418.2104432	0	0	0	65.40880503	0	0	0	0	0	0	0	0	0	0	0	0	0	0	0	0	0	0	0	0	0	0
Bosutinib	0	0	0	0	0	0	0	0	0	0	0	3.235433944	0	0	0	0	43.0223604	43.0223604	3.235433944	0	0	0	31.01708096	0	3.235433944	26.88172043	0	0	118.5599007	0	0	0	0	0	0	0	0	0	0	0	0	0	0	0	0	0	0	0	0
Brentuximab_vedotin	0	0	0	0	0	0	0	0	0	0	0	0	0	0	0	0	0	0	0	0	0	0	2.237136465	0	0	0	0	0	0	0	0	0	0	0	0	0	0	0	0	0	0	0	0	0	0	0	0	0	0
Brigatinib	0	0	0	0	0	0	0	0	0	0	0	3.235433944	63.26295251	0	0	0	0	0	3.235433944	0	0	0	98.12986271	0	3.235433944	0	0	0	0	0	0	0	0	0	0	0	0	0	0	0	0	0	0	0	0	0	0	0	0
Cabazitaxel	0	0	0	0	0	0	0	0	0	0	0	0	0	0	0	0	0	0	0	0	0	0	40.46631294	0	0	0	0	0	4.494382022	4.4345898	0	0	0	0	0	0	0	0	0	0	0	9.608277901	0	0	0	0	0	0	0
Cabozantinib	0	0	15.14076177	15.14076177	0	14.24711373	0	0	0	0	0	0	0	0	0	0	0	0	0	0	0	12.75008379	28.49422746	0	15.14076177	0	0	0	0	6.375041893	0	0	0	0	0	0	0	0	0	0	0	0	0	0	0	0	0	0	0
Carfilzomib	0	0	0	0	71.29232237	85.80858086	0	0	0	0	0	0	0	0	0	0	0	0	0	0	0	0	71.62534435	0	0	0	0	0	0	0	0	0	0	0	0	0	0	0	0	0	0	0	0	0	0	0	0	0	0
Ceritinib_(Zykadia_LDK378)	0	0	0	0	0	0	0	0	0	0	0	3.235433944	0	0	0	0	0	0	3.235433944	0	0	0	3.235433944	0	3.235433944	0	0	0	0	0	0	0	0	0	0	0	0	0	0	0	0	0	0	0	0	0	0	0	0
Cetuximab	0	0	0	0	0	0	0	0	0	0	0	0	63.26295251	0	0	0	0	0	0	0	0	0	94.89442877	0	0	0	0	0	0	0	0	0	0	0	0	0	0	0	0	0	0	0	0	0	0	0	0	0	0
Cobimetinib	0	0	0	0	170.8967851	0	0	0	0	0	0	0	0	0	0	0	0	0	0	0	0	0	170.8967851	0	0	0	0	0	0	0	0	0	0	0	0	0	0	0	0	0	0	0	0	0	0	0	0	0	0
Crizotinib	0	0	15.14076177	15.14076177	0	0	0	0	0	0	0	3.235433944	0	0	0	0	0	0	3.235433944	0	0	0	17.35518079	0	18.37619571	26.88172043	0	0	0	0	0	0	0	0	0	0	0	0	0	0	0	0	0	0	0	0	0	0	0
CYT387_(Momelotinib)	0	0	0	0	20.88849662	0	0	0	0	0	0	0	0	0	0	0	0	0	20.88849662	0	0	0	18.18181818	0	0	0	0	0	0	0	0	0	0	0	0	0	0	0	0	0	0	0	0	0	0	0	0	0	0
Dabrafenib	0	0	0	0	0	0	0	0	0	0	0	0	0	0	0	0	0	32.59452412	0	0	0	0	206.098364	0	86.75191995	0	0	173.5038399	0	0	0	0	0	0	0	0	0	0	0	0	0	0	0	0	0	0	0	0	0
Daratumumab	0	0	0	0	0	0	0	0	0	0	0	0	0	0	0	0	0	0	0	0	0	0	5.53709856	0	5.53709856	0	0	0	0	0	0	0	0	0	0	0	0	0	0	0	0	0	0	0	0	0	0	0	0
Dasatinib	0	92.88240833	0	0	0	10.57659502	0	0	0	0	13.30603889	0	0	0	0	0	43.0223604	43.0223604	0	22.67156863	0	0	77.33304526	18.07619488	0.912689911	0	0	0	118.5599007	0	0	0	0	0	0	0	0	0	0	0	0	0	0	0	0	0	0	0	0
Degarelix	0	0	0	0	0	0	0	0	0	0	0	0	0	0	0	0	0	0	0	0	0	0	3.039513678	0	0	0	0	3.039513678	0	0	0	0	0	0	0	0	0	0	0	0	0	0	0	0	0	0	0	0	0
Denileukin_diftitox_(Ontac)	0	0	0	0	0	0	0	0	0	0	0	0	0	0	0	0	0	53.72405372	0	0	53.72405372	0	53.72405372	0	0	19.3236715	0	0	0	0	0	0	0	0	0	0	53.72405372	0	0	0	0	0	0	0	0	0	0	0	0
Denosumab	0	0	0	0	0	0	0	0	0	0	0	0	0	0	0	0	0	0	0	0	0	0	0	0	0	0	0	0	0	0	0	0	0	0	0	0	0	0	0	0	0	0	0	0	0	0	0	0	0
Docetaxel	0	0	0	0	0.625681273	0	0	0	0	0	0	0	0	0	0	0	0	0	0	0	0	0	9.884940532	0	0	0	0	0	0	4.331450094	0	0	0	0	0	0	0	0	0	0	0	0	0	0	0	0	0	0	0
Dovitinib	0	0	0	0	0	14.24711373	0	0	0	0	13.30603889	0	0	0	0	0	0	0	0	22.67156863	0	0	116.09718	17.16350497	0	0	0	0	30.41443087	0	0	0	0	0	0	12.74312542	0	0	0	0	0	0	0	0	0	0	0	0	0
Durvalumab	0	0	0	0	0	0	0	0	0	0	0	0	0	0	0	0	0	0	0	0	0	0	0	0	0	0	0	0	0	0	0	0	0	0	0	0	0	0	0	0	0	0	0	0	0	0	0	0	0
Elotuzumab	0	0	0	0	0	0	0	0	0	0	0	0	0	0	0	0	0	0	0	0	0	0	0	0	0	0	0	0	0	0	0	0	0	0	0	0	0	0	0	0	0	0	0	0	0	0	0	0	0
Enzalutamide	0	0	0	0	0	0	0	0	0	0	0	0	0	0	0	5.473046985	0	0	0	0	0	0	10.94609397	0	0	0	0	0	0	10.94609397	0	0	0	0	0	0	0	0	0	0	0	0	0	0	0	0	0	0	0
Erlotinib	0	0	0	0	0	0	0	0	0	0	0	0	63.26295251	0	0	0	0	0	0	0	0	0	94.89442877	0	0	0	0	0	0	0	0	0	0	0	0	0	0	0	0	0	0	0	0	0	0	0	0	0	0
Estramustine	0	0	0	0	40.25657301	0	0	0	0	0	0	0	0	0	0	0	0	19.81544587	0	0	0	0	20.44112714	19.81544587	0	19.81544587	0	0	0	0	0	0	0	0	0	0	0	0	0	0	0	0	0	0	0	0	0	0	0
Everolimus	0	0	0	0	0	12.54901961	0	0	0	0	0	0	0	0	0	0	0	12.54901961	0	0	0	0	12.54901961	0	0	0	0	0	0	0	0	0	0	0	0	0	0	0	0	0	12.54901961	0	0	0	0	0	0	0	0
Exemestane	0	0	0	0	0	0	0	0	0	0	0	0	0	0	0	0	0	0	0	0	0	0	0	0	0	0	0	0	0	0	0	0	0	0	0	0	0	0	0	0	0	0	0	0	0	0	0	0	0
Flavopiridol_(Alvociclib)	0	0	0	0	0	0	0	0	0	56.85618729	0	0	63.26295251	0	0	0	0	0	4.301075269	0	0	0	327.9223133	19.36799185	0	0	0	4.301075269	0	0	0	0	0	0	0	0	0	0	0	0	0	0	0	0	0	0	0	0	0
Foretinib	0	0	15.14076177	15.14076177	0	26.21919805	0	0	0	0	13.30603889	0	63.26295251	0	0	0	0	0	0	0	0	0	228.6395989	17.16350497	15.14076177	0	0	7.613609327	30.41443087	0	0	0	0	0	0	12.74312542	0	0	0	0	0	0	0	0	13.62962963	0	0	0	0
Fulvestrant	0	0	0	0	39.63089173	0	0	0	0	0	0	0	0	0	0	0	0	19.81544587	0	0	0	0	19.81544587	19.81544587	0	19.81544587	0	0	0	0	0	0	0	0	0	0	0	0	0	0	0	0	0	0	0	0	0	0	0
Ganetespib_(STA-9090)	0	0	0	0	0	0	0	0	0	0	0	0	0	0	0	0	0	0	0	0	0	0	0	0	0	0	0	0	0	0	0	0	0	0	0	0	0	0	0	0	0	0	0	0	0	0	0	0	0
Gefitinib	0	0	0	0	0	0	0	0	0	0	0	0	63.26295251	0	0	0	0	0	0	0	0	0	94.89442877	0	0	0	0	0	0	0	0	0	0	0	0	0	0	0	0	0	0	0	0	0	0	0	0	0	0
Goserelin	0	0	0	0	0	0	0	0	0	0	0	0	0	0	0	0	0	0	0	0	0	0	5.420466059	0	0	0	2.380952381	3.039513678	0	0	0	0	0	0	0	0	0	0	0	0	0	0	0	0	0	0	0	0	0
Homoharringtonine_(Omacetaxine_mepesuccinate)	0	0	0	0	0	0	0	0	0	0	0	0	0	0	0	0	0	0	0	0	0	0	0	0	0	0	0	0	0	0	0	0	0	0	0	0	0	0	0	0	0	0	0	0	0	0	0	0	0
Ibritumomab_tiuxetan	0	0	0	0	0	0	0	0	0	0	0	0	0	0	0	0	0	0	0	0	0	0	0	0	0	0	0	0	0	0	0	0	0	0	0	0	0	0	0	0	0	0	0	0	0	0	0	0	0
Ibrutinib	18.18181818	0	0	0	0	0	0	0	0	0	0	0	0	0	0	0	0	0	0	0	0	0	18.18181818	0	0	0	0	0	0	0	0	0	0	0	0	0	0	0	0	0	0	0	0	0	0	0	0	0	0
Idelalisib	0	0	0	0	0	387.9014655	0	0	0	0	0	0	0	0	0	193.9507328	0	193.9507328	0	0	0	0	439.8809155	0	0	0	193.9507328	0	25.98972499	193.9507328	0	0	0	0	0	0	0	0	0	0	0	0	0	0	0	0	0	0	193.9507328
Imatinib	3.333062353	92.88240833	0	0	0	0	0	0	0	0	13.30603889	0	0	0	0	0	43.0223604	43.0223604	0	0	0	12.75008379	41.08970905	18.07619488	0.912689911	0	0	0	0	6.375041893	0	0	0	0	0	0	0	0	6.666124705	0	0	0	0	0	0	0	0	0	0
Inotuzumab_ozogamicin	0	0	0	0	0	0	0	0	0	0	0	0	0	0	0	0	0	0	0	0	0	0	3.144654088	0	0	0	0	0	0	0	0	1.572327044	0	0	0	0	0	0	0	0	0	0	0	0	0	0	0	0	0
Ipilimumab	0	0	0	0	0	0	0	0	0	0	0	0	0	0	0	0	0	0	0	0	0	0	0	0	0	0	0	0	0	0	0	0	0	0	0	0	0	0	0	0	0	0	0	0	0	0	0	0	0
Ixabepilone	0	0	0	0	0	0	0	0	0	0	0	0	0	0	0	0	0	0	0	0	0	0	40.46631294	0	0	0	0	0	4.494382022	4.4345898	0	0	0	0	0	0	0	0	0	0	0	9.608277901	0	0	0	0	0	0	0
Ixazomib_(MLN9708)	0	0	0	0	71.29232237	85.80858086	0	0	0	0	0	0	0	0	0	0	0	0	0	0	0	0	71.62534435	0	0	0	0	0	0	0	0	0	0	0	0	0	0	0	0	0	0	0	0	0	0	0	0	0	0
Lapatinib	0	0	0	0	0	0	0	0	0	0	0	0	63.26295251	0	0	0	22.90049068	22.90049068	0	0	0	0	117.7949194	0	0	0	0	0	0	11.45024534	0	0	0	0	0	0	0	0	0	0	0	0	0	0	0	0	0	0	0
Lenalidomide	0	0	0	0	0	0	0	0	0	0	0	0	0	0	0	0	0	0	0	0	0	0	0	0	0	0	0	0	0	0	0	0	0	0	0	0	0	0	0	0	0	0	0	0	0	0	0	0	0
Lenvatinib	0	0	0	32.18150311	0	14.24711373	0	0	0	0	13.30603889	0	0	0	0	0	0	0	0	0	0	12.75008379	108.1434562	0	0	0	0	0	30.41443087	6.375041893	0	0	0	0	0	0	0	0	0	0	0	0	0	0	0	0	0	0	0
Letrozole	0	0	0	0	0	0	0	0	0	0	0	0	0	0	0	0	0	0	0	0	0	0	0	0	0	0	0	0	0	0	0	0	0	0	0	0	0	0	0	0	0	0	0	0	0	0	0	0	0
Leuprolide	0	0	0	0	0	0	0	0	0	0	0	0	0	0	0	0	0	0	0	0	0	0	3.039513678	0	0	0	0	3.039513678	0	0	0	0	0	0	0	0	0	0	0	0	0	0	0	0	0	0	0	0	0
Lomustine	0	0	0	0	0	0	0	0	0	0	0	0	0	0	0	0	0	0	0	0	0	0	2.864545615	0	0	0	0	0	0	0	0	0	0	0	0	0	0	0	0	0	0	0	0	0	0	0	0	0	0
Masitinib	0	110.6967283	0	0	0	11.24833571	0	0	0	0	13.30603889	0	63.26295251	0	0	0	65.92285108	107.9553099	0	22.67156863	0	0	351.7888849	18.07619488	0.912689911	11.24833571	9.437934689	60.07653843	118.5599007	11.45024534	0	0	0	0	0	0	0	0	0	0	0	0	0	0	15.67621491	0	9.437934689	0	0
Medroxyprogesterone_acetate_(MPA)	0	0	0	0	39.63089173	0	0	0	0	0	0	0	0	0	0	0	0	22.31366143	0	0	0	0	24.81187699	19.81544587	0	19.81544587	0	0	0	0	0	0	0	0	0	0	0	0	0	0	0	0	0	0	0	0	0	0	0
Megestrol	0	0	0	0	0	0	0	0	0	0	0	0	0	0	0	0	0	2.49821556	0	0	0	0	4.996431121	0	0	0	0	0	0	0	0	0	0	0	0	0	0	0	0	0	0	0	0	0	0	0	0	0	0
Methyltestosterone	0	0	0	0	0	0	0	0	0	0	0	0	0	0	0	5.473046985	0	0	0	0	0	0	10.94609397	0	0	0	0	0	0	10.94609397	0	0	0	0	0	0	0	0	0	0	0	0	0	0	0	0	0	0	0
Midostaurin	0	0	0	0	0	0	0	0	0	0	0	0	0	0	0	0	0	0	0	0	0	0	0	0	0	0	0	0	0	0	0	0	0	0	0	12.74312542	0	0	0	0	0	0	0	0	0	0	0	0	0
Mogamulizumab	0	0	0	0	0	0	0	0	0	0	0	0	0	0	0	0	0	0	0	0	0	0	0	0	0	0	0	0	0	0	0	0	0	0	0	0	0	0	0	0	0	0	0	0	0	0	0	0	0
Moxetumomab_pasudotox	0	0	0	0	0	0	0	0	0	0	0	0	0	0	0	0	0	0	0	0	0	0	3.144654088	0	0	0	0	0	0	0	0	1.572327044	0	0	0	0	0	0	0	0	0	0	0	0	0	0	0	0	0
Necitumumab	0	0	0	0	0	0	0	0	0	0	0	0	63.26295251	0	0	0	0	0	0	0	0	0	94.89442877	0	0	0	0	0	0	0	0	0	0	0	0	0	0	0	0	0	0	0	0	0	0	0	0	0	0
Nilotinib	0	0	0	0	0	0	0	0	0	0	13.30603889	0	0	0	0	0	43.0223604	43.0223604	0	0	0	0	14.3407868	0	0	0	0	0	0	0	0	0	0	0	0	0	0	0	0	0	0	0	0	0	0	0	0	0	0
Nilutamide	0	0	0	0	0	0	0	0	0	0	0	0	0	0	0	5.473046985	0	0	0	0	0	0	10.94609397	0	0	0	0	0	0	10.94609397	0	0	0	0	0	0	0	0	0	0	0	0	0	0	0	0	0	0	0
Nimotuzumab	0	0	0	0	0	0	0	0	0	0	0	0	63.26295251	0	0	0	0	0	0	0	0	0	94.89442877	0	0	0	0	0	0	0	0	0	0	0	0	0	0	0	0	0	0	0	0	0	0	0	0	0	0
Nintedanib_(BIBF_1120)	0	92.88240833	0	32.18150311	0	14.24711373	0	0	0	0	0	0	0	0	0	0	0	0	0	0	0	0	108.1434562	17.16350497	0	0	0	0	148.9743316	0	0	0	0	0	0	12.74312542	0	0	0	0	0	0	0	0	0	0	0	0	0
Niraparib	0	0	0	0	3.854536472	2.674916673	0	0	0	0	0	0	0	0	0	0	0	0	0	0	0	0	1.179619799	0	0	0	0	0	0	0	0	0	0	0	0	0	0	0	0	0	0	0	0	0	0	0	0	0	0
Nivolumab_(BMS-936558)	0	0	0	0	0	0	0	0	0	0	0	0	0	0	0	0	0	0	0	0	0	0	2.306805075	0	0	0	0	0	0	0	0	0	0	0	0	0	0	0	0	0	0	0	0	0	0	0	0	0	0
Obinutuzumab	0	0	0	0	0	0	0	0	0	0	0	0	0	0	0	0	0	0	0	0	0	0	0	0	0	0	0	0	0	0	0	0	0	0	0	0	0	0	0	0	0	0	0	0	0	0	0	0	0
Ofatumumab	0	0	0	0	0	0	0	0	0	0	0	0	0	0	0	0	0	0	0	0	0	0	0	0	0	0	0	0	0	0	0	0	0	0	0	0	0	0	0	0	0	0	0	0	0	0	0	0	0
Olaparib	0	0	0	0	2.674916673	2.674916673	0	0	0	0	0	0	0	0	0	0	0	0	0	0	0	0	0.571265353	0	0	0	0	0	0	0.571265353	0	0	0	0	0	0	0	0	0	0	0	0	0	0	0	0	0	0	0
Olaratumab	0	0	0	0	0	0	0	0	0	0	0	0	0	0	0	0	0	0	0	0	0	0	14.37308869	0	0	0	0	0	0	0	0	0	0	0	0	0	0	0	0	0	0	0	0	0	0	0	0	0	0
Osimertinib	0	0	0	0	0	0	0	0	0	0	0	0	63.26295251	0	0	0	0	0	0	0	0	0	94.89442877	0	0	0	0	0	0	0	0	0	0	0	0	0	0	0	0	0	0	0	0	0	0	0	0	0	0
Paclitaxel	0	0	0	0	0.625681273	0	0	0	0	0	0	0	0	0	0	0	0	0	0	0	0	0	86.6760398	0	0	0	0	0	4.494382022	8.766039895	0	0	0	0	0	0	0	0	0	0	0	9.608277901	0	0	0	0	0	0	0
Palbociclib	0	0	0	0	0	0	0	0	0	0	0	0	0	0	0	0	0	0	0	0	0	0	26.31578947	19.36799185	0	0	0	0	0	0	0	0	0	0	0	0	0	0	0	0	0	0	0	0	0	0	0	0	0
Panitumumab	0	0	0	0	0	0	0	0	0	0	0	0	63.26295251	0	0	0	0	0	0	0	0	0	94.89442877	0	0	0	0	0	0	0	0	0	0	0	0	0	0	0	0	0	0	0	0	0	0	0	0	0	0
Panobinostat	12.90179068	0	57.19023073	0	12.45210728	39.11652281	0	0	0	0	12.29982068	0	0	0	0	0	0	0	0	0	0	57.19023073	67.77438448	0	12.29982068	0	0	24.59964136	0	8.70830612	0	0	0	0	0	0	0	0	0	0	0	0	0	0	0	0	0	0	0
Pazopanib	0	0	0	0	0	14.24711373	0	0	0	0	13.30603889	0	0	0	0	0	0	0	0	0	0	0	89.22281794	17.16350497	0	0	0	0	30.41443087	0	0	0	0	0	0	0	0	0	0	0	0	0	0	0	0	0	0	0	0
Pembrolizumab	0	0	0	0	0	0	0	0	0	0	0	0	0	0	0	0	0	0	0	0	0	0	2.306805075	0	0	0	0	0	0	0	0	0	0	0	0	0	0	0	0	0	0	0	0	0	0	0	0	0	0
Perifosine	0	0	0	0	0	82.98755187	0	0	0	0	0	0	0	0	0	0	0	0	0	0	0	0	82.98755187	0	181.5661816	0	0	0	0	0	0	0	0	0	0	0	0	0	0	0	0	0	0	0	0	0	0	0	0
Pertuzumab	0	0	0	0	0	0	0	0	0	0	0	0	0	0	0	0	22.90049068	22.90049068	0	0	0	0	22.90049068	0	0	0	0	0	0	11.45024534	0	0	0	0	0	0	0	0	0	0	0	0	0	0	0	0	0	0	0
Pomalidomide	0	0	0	0	0	0	0	0	0	0	0	0	0	0	0	0	0	0	0	0	0	0	91.16809117	0	0	0	0	0	0	0	0	0	0	0	0	0	0	0	0	0	0	0	0	0	0	0	0	0	0
Ponatinib	3.333062353	0	0	0	0	0	0	0	0	0	0	0	0	0	0	0	43.0223604	43.0223604	0	0	0	0	17.67384915	0	0	0	0	0	0	0	0	0	0	0	0	0	0	0	6.666124705	0	0	0	0	0	0	0	0	0	0
Ramucirumab_(Cyramza)	0	0	0	0	0	14.24711373	0	0	0	0	0	0	0	0	0	0	0	0	0	0	0	0	28.49422746	0	0	0	0	0	0	0	0	0	0	0	0	0	0	0	0	0	0	0	0	0	0	0	0	0	0
Regorafenib	0	0	0	0	0	64.08046813	0	0	0	0	13.30603889	0	0	0	0	0	43.0223604	75.61688452	0	0	0	12.75008379	342.2122367	17.16350497	86.75191995	0	0	173.5038399	30.41443087	6.375041893	0	0	0	0	0	12.74312542	0	0	0	0	0	0	0	0	13.62962963	0	0	0	0
Ribociclib	0	0	0	0	0	0	0	0	0	0	0	0	0	0	0	0	0	0	0	0	0	0	26.31578947	19.36799185	0	0	0	0	0	0	0	0	0	0	0	0	0	0	0	0	0	0	0	0	0	0	0	0	0
Rigosertib	0	0	0	0	0	19.86754967	0	0	0	0	0	0	0	0	0	0	0	19.86754967	0	0	0	0	19.86754967	0	0	0	0	0	0	0	0	0	0	0	0	0	0	0	0	0	0	0	0	0	0	0	0	0	0
Rituximab	0	0	0	0	0	0	0	0	0	0	0	0	0	0	0	0	0	0	0	0	0	0	0	0	0	0	0	0	0	0	0	0	0	0	0	0	0	0	0	0	0	0	0	0	0	0	0	0	0
Romidepsin	12.90179068	0	57.19023073	0	0	26.66441553	0	0	0	0	12.29982068	0	0	0	0	0	0	0	0	0	0	57.19023073	67.77438448	0	12.29982068	0	0	24.59964136	0	8.70830612	0	0	0	0	0	0	0	0	0	0	0	0	0	0	0	0	0	0	0
Rucaparib	0	0	0	0	3.854536472	2.674916673	0	0	0	0	0	0	0	0	0	0	0	0	0	0	0	0	1.179619799	0	0	0	0	0	0	0	0	0	0	0	0	0	0	0	0	0	0	0	0	0	0	0	0	0	0
Ruxolitinib	0	0	0	0	20.88849662	0	0	0	0	0	0	0	0	0	0	0	0	0	20.88849662	0	0	0	18.18181818	0	0	0	0	0	0	0	0	0	0	0	0	0	0	0	0	0	0	0	0	0	0	0	0	0	0
Selumetinib	0	0	0	0	170.8967851	0	0	0	0	0	0	0	0	0	0	0	0	0	0	0	0	0	170.8967851	0	0	0	0	0	0	0	0	0	0	0	0	0	0	0	0	0	0	0	0	0	0	0	0	0	0
Siltuximab	0	0	0	0	0	0	0	0	0	0	0	0	0	0	0	0	0	0	0	0	0	0	148.4716157	0	0	0	0	0	0	0	0	0	0	0	0	0	0	0	0	0	0	0	0	0	0	0	0	0	0
Sonidegib_(LDE225)	0	0	0	0	0	1.692047377	0	0	0	0	0	0	0	0	0	0	0	0	0	0	0	0	1.692047377	0	0	0	0	0	0	0	0	0	0	0	0	0	0	0	0	0	0	0	0	0	0	0	0	0	0
Sorafenib	0	0	0	0	0	14.24711373	0	0	0	0	13.30603889	0	0	0	0	0	0	32.59452412	0	0	0	12.75008379	299.8687316	17.16350497	86.75191995	0	0	173.5038399	30.41443087	6.375041893	0	0	0	0	0	12.74312542	0	0	0	0	0	0	0	0	0	0	0	0	0
Sunitinib	0	17.81431997	0	0	0	14.24711373	0	0	0	0	13.30603889	0	0	0	0	0	0	0	0	0	0	0	107.0371379	17.16350497	0	0	0	0	30.41443087	0	0	0	0	0	0	12.74312542	0	0	0	0	0	0	0	0	0	0	0	0	0
Tamoxifen	0	0	0	0	39.63089173	0	0	0	0	0	0	0	0	0	0	0	0	19.81544587	0	0	0	0	19.81544587	19.81544587	0	19.81544587	0	0	0	0	0	0	0	0	0	0	0	0	0	0	0	0	0	0	0	0	0	0	0
Tecemotide_(Emepepimut-S_L-BLP25)	0	0	0	0	0	0	0	0	0	0	0	0	0	0	0	0	0	0	0	0	0	0	0	0	0	0	0	0	0	0	0	0	0	0	0	0	0	0	0	0	0	0	0	0	0	0	0	0	0
Temozolomide	0	0	0	0	0	0	0	0	0	0	0	0	0	0	0	0	0	0	0	0	0	0	2.864545615	0	0	0	0	0	0	0	0	0	0	0	0	0	0	0	0	0	0	0	0	0	0	0	0	0	0
Temsirolimus	0	0	0	0	0	12.54901961	0	0	0	0	0	0	0	0	0	0	0	12.54901961	0	0	0	0	12.54901961	0	0	0	0	0	0	0	0	0	0	0	0	0	0	0	0	0	12.54901961	0	0	0	0	0	0	0	0
Thalidomide	0	0	46.15714899	0	0	0	0	0	0	0	0	0	0	0	0	0	0	0	0	0	0	0	137.3252402	0	0	0	0	0	0	0	0	0	0	0	0	0	0	0	0	0	0	0	0	0	0	0	0	0	0
Tivantinib	0	0	15.14076177	15.14076177	0	110.6524396	0	0	0	0	0	0	0	0	0	0	0	36.88414652	0	0	0	0	36.71656514	0	15.14076177	0	0	0	63.29498666	0	0	0	0	0	0	0	0	0	0	0	0	0	0	0	0	0	0	0	0
Tivozanib	0	0	0	0	0	14.24711373	0	0	0	0	0	0	0	0	0	0	0	0	0	0	0	0	74.84972925	0	0	0	0	0	30.41443087	0	0	0	0	0	0	0	0	0	0	0	0	0	0	0	0	0	0	0	0
Toremifene	0	0	0	0	39.63089173	0	0	0	0	0	0	0	0	0	0	0	0	19.81544587	0	0	0	0	19.81544587	19.81544587	0	19.81544587	0	0	0	0	0	0	0	0	0	0	0	0	0	0	0	0	0	0	0	0	0	0	0
Trametinib_(Mekinst)	0	0	0	0	170.8967851	0	0	0	0	0	0	0	0	0	0	0	0	0	0	0	0	0	170.8967851	0	0	0	0	0	0	0	0	0	0	0	0	0	0	0	0	0	0	0	0	0	0	0	0	0	0
Trastuzumab	0	0	0	0	0	0	0	0	0	0	0	0	0	0	0	0	22.90049068	22.90049068	0	0	0	0	22.90049068	0	0	0	0	0	0	11.45024534	0	0	0	0	0	0	0	0	0	0	0	0	0	0	0	0	0	0	0
Trebananib	0	16.06425703	0	0	0	0	0	0	0	0	0	0	0	0	0	0	0	0	0	0	0	0	16.06425703	0	0	0	0	0	0	0	0	0	0	0	0	0	0	0	0	0	0	0	0	0	0	0	0	0	0
Vandetanib	0	0	0	0	0	14.24711373	0	0	0	0	0	0	63.26295251	0	0	0	0	0	0	0	0	0	123.3886562	0	0	0	0	0	0	0	0	0	0	0	0	0	0	0	0	0	0	0	0	0	0	0	0	0	0
Veliparib	0	0	0	0	0	0	0	0	0	0	0	0	0	0	0	0	0	0	0	0	0	0.38647343	0	0	0	0	0	0.38647343	0	0	0	0	0	0	0	0	0	0	0	0	0	0	0	0	0	0	0	0	0
Vemurafenib	0	0	0	0	0	0	0	0	0	0	0	0	0	0	0	0	0	32.59452412	0	0	0	0	32.59452412	0	0	0	0	0	0	0	0	0	0	0	0	0	0	0	0	0	0	0	0	0	0	0	0	0	0
Venetoclax	0	0	0	0	0	0	0	0	0	0	0	0	0	0	0	0	0	0	0	0	0	0	0	0	0	0	0	0	0	0	0	0	0	0	0	0	0	0	0	0	0	0	0	0	0	0	0	0	0
Vinblastine	0	0	0	0	0	0	0	0	0	0	0	0	0	0	0	0	0	0	0	0	0	0	1.659406762	0	0	0	0	0	0	0	0	0	0	0	0	0	0	0	0	0	0	0	0	0	0	0	0	0	0
Vincristine	0	0	0	0	0	0	0	0	0	0	0	0	0	0	0	0	0	0	0	0	0	0	40.46631294	0	0	0	0	0	4.494382022	4.4345898	0	0	0	0	0	0	0	0	0	0	0	9.608277901	0	0	0	0	0	0	0
Vindesine	0	0	0	0	0	0	0	0	0	0	0	0	0	0	0	0	0	0	0	0	0	0	40.46631294	0	0	0	0	0	4.494382022	4.4345898	0	0	0	0	0	0	0	0	0	0	0	9.608277901	0	0	0	0	0	0	0
Vinorelbine	0	0	0	0	0	0	0	0	0	0	0	0	0	0	0	0	0	0	0	0	0	0	40.46631294	0	0	0	0	0	4.494382022	4.4345898	0	0	0	0	0	0	0	0	0	0	0	9.608277901	0	0	0	0	0	0	0
Vismodegib	0	0	0	0	0	1.692047377	0	0	0	0	0	0	0	0	0	0	0	0	0	0	0	0	1.692047377	0	0	0	0	0	0	0	0	0	0	0	0	0	0	0	0	0	0	0	0	0	0	0	0	0	0
Vorinostat	12.90179068	0	57.19023073	0	12.45210728	39.11652281	0	0	0	0	12.29982068	0	0	0	0	0	0	0	0	0	0	57.19023073	67.77438448	0	12.29982068	0	0	24.59964136	0	8.70830612	0	0	0	0	0	0	0	0	0	0	0	0	0	0	0	0	0	0	0
[truncated: 3,751 more columns]
