# Supplementary material for: Pathway Based Analysis of Mutation Data Is Efficient for Scoring Target Cancer Drugs
Source: Front Pharmacol. 2019 Jan 23;10:1. doi: 10.3389/fphar.2019.00001 (PMC6351482; doi:10.3389/fphar.2019.00001)
Supplement: Supplementary Data Sheet 3 — Mutation drug scores for 3800 TCGA tumor samples for 10 versions of drug scoring algorithm. The dataset contains 10 tables that match the 10 methods of drug scoring. [file Data_Sheet_3.ZIP › MDS2_gene.csv]

	TCGA.AG.3881.01	TCGA.63.6202.01	TCGA.MH.A561.01	TCGA.DZ.6135.01	TCGA.BR.8368.01	TCGA.HU.A4GQ.01	TCGA.36.1571.01	TCGA.19.5953.01	TCGA.41.2573.01	TCGA.CZ.4865.01	TCGA.A4.A57E.01	TCGA.02.0114.01	TCGA.81.5911.01	TCGA.27.2526.01	TCGA.BP.4351.01	TCGA.B8.5159.01	TCGA.IN.8663.01	TCGA.AH.6644.01	TCGA.CM.5344.01	TCGA.AA.3685.01	TCGA.EI.6508.01	TCGA.AA.3697.01	TCGA.AA.3977.01	TCGA.AG.A02X.01	TCGA.DC.4745.01	TCGA.AA.3494.01	TCGA.85.6560.01	TCGA.A6.6782.01	TCGA.D5.6533.01	TCGA.G4.6293.01	TCGA.HT.7873.01	TCGA.DU.7294.01	TCGA.DB.A64R.01	TCGA.FG.6690.01	TCGA.DU.6542.01	TCGA.HT.8109.01	TCGA.DU.A5TW.01	TCGA.HT.7877.01	TCGA.HW.8322.01	TCGA.HT.7695.01	TCGA.DU.6393.01	TCGA.QH.A65Z.01	TCGA.HT.8106.01	TCGA.DB.A64P.01	TCGA.DB.A64X.01	TCGA.DU.5851.01	TCGA.06.6701.01	TCGA.HT.7879.01	TCGA.FG.7634.01
Abemaciclib_(LY2835219)	0	0	0	0	0	0	0	0	0	0	0	0	0	0	0	0	0	0	0	0	0	0	1.096491228	1.019367992	0	0	0	0	0	0	0	0	0	0	0	0	0	0	0	0	0	0	0	0	0	0	0	0	0
Afatinib	0	0	0	0	0	0	0	0	0	0	0	0	0.645540332	0	0	0	0.532569551	0.532569551	0	0	0	0	1.500880048	0	0	0	0	0	0	0.266284775	0	0	0	0	0	0	0	0	0	0	0	0	0	0	0	0	0	0	0
Aflibercept	0	0	0	0	0	0	0	0	0	0	0	0	0	0	0	0	0	0	0	0	0	0	0	0	0	0	0	0	0	0	0	0	0	0	0	0	3.341976376	0	0	0	0	0	0	0	0	0	0	0	0
Alectinib	0	0	0	0	0	0	0	0	0	0	0	0.215695596	0	0	0	0	0	0	0.215695596	0	0	0	0.215695596	0	0.215695596	0	0	0	0	0	0	0	0	0	0	0	0	0	0	0	0	0	0	0	0	0	0	0	0
Alemtuzumab	0	0	0	0	0	0	0	0	0	0	0	0	0	0	0	0	0	0	0	0	0	0	0	0	0	0	0	0	0	0	0	0	0	0	0	0	0	0	0	0	0	0	0	0	0	0	0	0	0
Alitretinoin	0	0	0	0	0	0	0	0	0	0	0	0	0	0	0	0	0	0	0	0	0.736215758	0	2.910764725	0	0	0	0	0	0	0	0	0	0	0	0	0	0	0	0	0	0	0	0	0	0	0	0	0	0
Apalutamide_ARN-509	0	0	0	0	0	0	0	0	0	0	0	0	0	0	0	0.390931928	0	0	0	0	0	0	0.781863855	0	0	0	0	0	0	0.781863855	0	0	0	0	0	0	0	0	0	0	0	0	0	0	0	0	0	0	0
Arsenic_trioxide	0	0	0	0	0	0	0	0	0	0	0	0	0	0	0	0	0	0	0	0	0	0	2.185706355	0	0	0	0	0	0	0	0	0	0	0	0	0	0	0	0	0	0	0	0	0	0	0	0	0	0
Atezolizumab	0	0	0	0	0	0	0	0	0	0	0	0	0	0	0	0	0	0	0	0	0	0	0	0	0	0	0	0	0	0	0	0	0	0	0	0	0	0	0	0	0	0	0	0	0	0	0	0	0
Avelumab	0	0	0	0	0	0	0	0	0	0	0	0	0	0	0	0	0	0	0	0	0	0	0	0	0	0	0	0	0	0	0	0	0	0	0	0	0	0	0	0	0	0	0	0	0	0	0	0	0
Axitinib	0	0	0	0	0	0.245639892	0	0	0	0	0	0	0	0	0	0	0	0	0	0	0	0	1.675365951	0	0	0	0	0	0.822011645	0	0	0	0	0	0	0	0	0	0	0	0	0	0	0	0	0	0	0	0
Belinostat	0.921556477	0	1.21681342	0	0.957854406	2.499088852	0	0	0	0	0.723518863	0	0	0	0	0	0	0	0	0	0	1.21681342	3.080659533	0	0.723518863	0	0	1.447037727	0	0.580553741	0	0	0	0	0	0	0	0	0	0	0	0	0	0	0	0	0	0	0
Bevacizumab	0	0	0	0	0	0	0	0	0	0	0	0	0	0	0	0	0	0	0	0	0	0	0	0	0	0	0	0	0	0	0	0	0	0	0	0	0	0	0	0	0	0	0	0	0	0	0	0	0
Bexarotene	0	0	0	0	0	0	0	0	0	0	0	0	0	0	0	0	0	0	0	0	0	0	1.438333209	0	0	0	0	0	0	0	0	0	0	0	0	0	0	0	0	0	0	0	0	0	0	0	0	0	0
Bicalutamide	0	0	0	0	0	0	0	0	0	0	0	0	0	0	0	0.390931928	0	0	0	0	0	0	0.781863855	0	0	0	0	0	0	0.781863855	0	0	0	0	0	0	0	0	0	0	0	0	0	0	0	0	0	0	0
Binimetinib_(MEK162)	0	0	0	0	0.846023689	0	0	0	0	0	0	0	0	0	0	0	0	0	0	0	0	0	0.846023689	0	0	0	0	0	0	0	0	0	0	0	0	0	0	0	0	0	0	0	0	0	0	0	0	0	0
Blinatumomab	0	0	0	0	0	0	0	0	0	0	0	0	0	0	0	0	0	0	0	0	0	0	1.937984496	0	0	0	0	0	0	0	0	0	0	0	0	0	0	0	0	0	0	0	0	0	0	0	0	0	0
Bortezomib	0	0	0	0	1.371006199	2.908026652	0	0	0	0	0	0	0	0	0	0	0	0	0	0	0	0	8.743502252	0	0	0	1.257861635	0	0	0	0	0	0	0	0	0	0	0	0	0	0	0	0	0	0	0	0	0	0
Bosutinib	0	0	0	0	0	0	0	0	0	0	0	0.215695596	0	0	0	0	0.878007355	0.878007355	0.215695596	0	0	0	1.045999123	0	0.215695596	1.075268817	0	0	0.620732464	0	0	0	0	0	0	0	0	0	0	0	0	0	0	0	0	0	0	0	0
Brentuximab_vedotin	0	0	0	0	0	0	0	0	0	0	0	0	0	0	0	0	0	0	0	0	0	0	0.559284116	0	0	0	0	0	0	0	0	0	0	0	0	0	0	0	0	0	0	0	0	0	0	0	0	0	0
Brigatinib	0	0	0	0	0	0	0	0	0	0	0	0.215695596	0.645540332	0	0	0	0	0	0.215695596	0	0	0	1.184006094	0	0.215695596	0	0	0	0	0	0	0	0	0	0	0	0	0	0	0	0	0	0	0	0	0	0	0	0
Cabazitaxel	0	0	0	0	0	0	0	0	0	0	0	0	0	0	0	0	0	0	0	0	0	0	2.991195464	0	0	0	0	0	0.74906367	0.7390983	0	0	0	0	0	0	0	0	0	0	0	0.7390983	0	0	0	0	0	0	0
Cabozantinib	0	0	0.236574403	0.236574403	0	0.245639892	0	0	0	0	0	0	0	0	0	0	0	0	0	0	0	0.607146847	0.491279784	0	0.236574403	0	0	0	0	0.303573423	0	0	0	0	0	0	0	0	0	0	0	0	0	0	0	0	0	0	0
Carfilzomib	0	0	0	0	1.371006199	1.650165017	0	0	0	0	0	0	0	0	0	0	0	0	0	0	0	0	1.377410468	0	0	0	0	0	0	0	0	0	0	0	0	0	0	0	0	0	0	0	0	0	0	0	0	0	0
Ceritinib_(Zykadia_LDK378)	0	0	0	0	0	0	0	0	0	0	0	0.215695596	0	0	0	0	0	0	0.215695596	0	0	0	0.215695596	0	0.215695596	0	0	0	0	0	0	0	0	0	0	0	0	0	0	0	0	0	0	0	0	0	0	0	0
Cetuximab	0	0	0	0	0	0	0	0	0	0	0	0	0.645540332	0	0	0	0	0	0	0	0	0	0.968310498	0	0	0	0	0	0	0	0	0	0	0	0	0	0	0	0	0	0	0	0	0	0	0	0	0	0
Cobimetinib	0	0	0	0	0.846023689	0	0	0	0	0	0	0	0	0	0	0	0	0	0	0	0	0	0.846023689	0	0	0	0	0	0	0	0	0	0	0	0	0	0	0	0	0	0	0	0	0	0	0	0	0	0
Crizotinib	0	0	0.236574403	0.236574403	0	0	0	0	0	0	0	0.215695596	0	0	0	0	0	0	0.215695596	0	0	0	1.432216631	0	0.452269999	1.075268817	0	0	0	0	0	0	0	0	0	0	0	0	0	0	0	0	0	0	0	0	0	0	0
CYT387_(Momelotinib)	0	0	0	0	0.294204178	0	0	0	0	0	0	0	0	0	0	0	0	0	0.294204178	0	0	0	0.288600289	0	0	0	0	0	0	0	0	0	0	0	0	0	0	0	0	0	0	0	0	0	0	0	0	0	0
Dabrafenib	0	0	0	0	0	0	0	0	0	0	0	0	0	0	0	0	0	0.434593655	0	0	0	0	1.449235994	0	0.507321169	0	0	1.014642339	0	0	0	0	0	0	0	0	0	0	0	0	0	0	0	0	0	0	0	0	0
Daratumumab	0	0	0	0	0	0	0	0	0	0	0	0	0	0	0	0	0	0	0	0	0	0	1.107419712	0	1.107419712	0	0	0	0	0	0	0	0	0	0	0	0	0	0	0	0	0	0	0	0	0	0	0	0
Dasatinib	0	1.272361758	0	0	0	0.341180484	0	0	0	0	0.341180484	0	0	0	0	0	0.878007355	0.878007355	0	0.612745098	0	0	1.217694774	0.605344093	0.30422997	0	0	0	0.620732464	0	0	0	0	0	0	0	0	0	0	0	0	0	0	0	0	0	0	0	0
Degarelix	0	0	0	0	0	0	0	0	0	0	0	0	0	0	0	0	0	0	0	0	0	0	1.013171226	0	0	0	0	1.013171226	0	0	0	0	0	0	0	0	0	0	0	0	0	0	0	0	0	0	0	0	0
Denileukin_diftitox_(Ontac)	0	0	0	0	0	0	0	0	0	0	0	0	0	0	0	0	0	1.221001221	0	0	1.221001221	0	1.221001221	0	0	0.603864734	0	0	0	0	0	0	0	0	0	0	1.221001221	0	0	0	0	0	0	0	0	0	0	0	0
Denosumab	0	0	0	0	0	0	0	0	0	0	0	0	0	0	0	0	0	0	0	0	0	0	0	0	0	0	0	0	0	0	0	0	0	0	0	0	0	0	0	0	0	0	0	0	0	0	0	0	0
Docetaxel	0	0	0	0	0.208560424	0	0	0	0	0	0	0	0	0	0	0	0	0	0	0	0	0	1.531311747	0	0	0	0	0	0	0.433145009	0	0	0	0	0	0	0	0	0	0	0	0	0	0	0	0	0	0	0
Dovitinib	0	0	0	0	0	0.245639892	0	0	0	0	0.341180484	0	0	0	0	0	0	0	0	0.612745098	0	0	2.662213125	0.301114122	0	0	0	0	0.822011645	0	0	0	0	0	0	0.670690812	0	0	0	0	0	0	0	0	0	0	0	0	0
Durvalumab	0	0	0	0	0	0	0	0	0	0	0	0	0	0	0	0	0	0	0	0	0	0	0	0	0	0	0	0	0	0	0	0	0	0	0	0	0	0	0	0	0	0	0	0	0	0	0	0	0
Elotuzumab	0	0	0	0	0	0	0	0	0	0	0	0	0	0	0	0	0	0	0	0	0	0	0	0	0	0	0	0	0	0	0	0	0	0	0	0	0	0	0	0	0	0	0	0	0	0	0	0	0
Enzalutamide	0	0	0	0	0	0	0	0	0	0	0	0	0	0	0	0.390931928	0	0	0	0	0	0	0.781863855	0	0	0	0	0	0	0.781863855	0	0	0	0	0	0	0	0	0	0	0	0	0	0	0	0	0	0	0
Erlotinib	0	0	0	0	0	0	0	0	0	0	0	0	0.645540332	0	0	0	0	0	0	0	0	0	0.968310498	0	0	0	0	0	0	0	0	0	0	0	0	0	0	0	0	0	0	0	0	0	0	0	0	0	0
Estramustine	0	0	0	0	1.447025791	0	0	0	0	0	0	0	0	0	0	0	0	0.619232683	0	0	0	0	0.827793108	0.619232683	0	0.619232683	0	0	0	0	0	0	0	0	0	0	0	0	0	0	0	0	0	0	0	0	0	0	0
Everolimus	0	0	0	0	0	0.130718954	0	0	0	0	0	0	0	0	0	0	0	0.130718954	0	0	0	0	0.130718954	0	0	0	0	0	0	0	0	0	0	0	0	0	0	0	0	0	0.130718954	0	0	0	0	0	0	0	0
Exemestane	0	0	0	0	0	0	0	0	0	0	0	0	0	0	0	0	0	0	0	0	0	0	0	0	0	0	0	0	0	0	0	0	0	0	0	0	0	0	0	0	0	0	0	0	0	0	0	0	0
Flavopiridol_(Alvociclib)	0	0	0	0	0	0	0	0	0	1.114827202	0	0	0.645540332	0	0	0	0	0	0.716845878	0	0	0	7.022088101	1.019367992	0	0	0	0.716845878	0	0	0	0	0	0	0	0	0	0	0	0	0	0	0	0	0	0	0	0	0
Foretinib	0	0	0.236574403	0.236574403	0	0.993895162	0	0	0	0	0.341180484	0	0.645540332	0	0	0	0	0	0	0	0	0	4.730349553	0.301114122	0.236574403	0	0	0.475850583	0.822011645	0	0	0	0	0	0	0.670690812	0	0	0	0	0	0	0	0	0.592592593	0	0	0	0
Fulvestrant	0	0	0	0	1.238465367	0	0	0	0	0	0	0	0	0	0	0	0	0.619232683	0	0	0	0	0.619232683	0.619232683	0	0.619232683	0	0	0	0	0	0	0	0	0	0	0	0	0	0	0	0	0	0	0	0	0	0	0
Ganetespib_(STA-9090)	0	0	0	0	0	0	0	0	0	0	0	0	0	0	0	0	0	0	0	0	0	0	0	0	0	0	0	0	0	0	0	0	0	0	0	0	0	0	0	0	0	0	0	0	0	0	0	0	0
Gefitinib	0	0	0	0	0	0	0	0	0	0	0	0	0.645540332	0	0	0	0	0	0	0	0	0	0.968310498	0	0	0	0	0	0	0	0	0	0	0	0	0	0	0	0	0	0	0	0	0	0	0	0	0	0
Goserelin	0	0	0	0	0	0	0	0	0	0	0	0	0	0	0	0	0	0	0	0	0	0	1.489361702	0	0	0	0.476190476	1.013171226	0	0	0	0	0	0	0	0	0	0	0	0	0	0	0	0	0	0	0	0	0
Homoharringtonine_(Omacetaxine_mepesuccinate)	0	0	0	0	0	0	0	0	0	0	0	0	0	0	0	0	0	0	0	0	0	0	0	0	0	0	0	0	0	0	0	0	0	0	0	0	0	0	0	0	0	0	0	0	0	0	0	0	0
Ibritumomab_tiuxetan	0	0	0	0	0	0	0	0	0	0	0	0	0	0	0	0	0	0	0	0	0	0	0	0	0	0	0	0	0	0	0	0	0	0	0	0	0	0	0	0	0	0	0	0	0	0	0	0	0
Ibrutinib	0.505050505	0	0	0	0	0	0	0	0	0	0	0	0	0	0	0	0	0	0	0	0	0	0.505050505	0	0	0	0	0	0	0	0	0	0	0	0	0	0	0	0	0	0	0	0	0	0	0	0	0	0
Idelalisib	0	0	0	0	0	1.247271593	0	0	0	0	0	0	0	0	0	0.623635797	0	0.623635797	0	0	0	0	1.851683803	0	0	0	0.623635797	0	0.302206105	0.623635797	0	0	0	0	0	0	0	0	0	0	0	0	0	0	0	0	0	0	0.623635797
Imatinib	0.277755196	1.272361758	0	0	0	0	0	0	0	0	0.341180484	0	0	0	0	0	0.878007355	0.878007355	0	0	0	0.607146847	3.212985008	0.605344093	0.30422997	0	0	0	0	0.303573423	0	0	0	0	0	0	0	0	0.555510392	0	0	0	0	0	0	0	0	0	0
Inotuzumab_ozogamicin	0	0	0	0	0	0	0	0	0	0	0	0	0	0	0	0	0	0	0	0	0	0	0.786163522	0	0	0	0	0	0	0	0	0.393081761	0	0	0	0	0	0	0	0	0	0	0	0	0	0	0	0	0
Ipilimumab	0	0	0	0	0	0	0	0	0	0	0	0	0	0	0	0	0	0	0	0	0	0	0	0	0	0	0	0	0	0	0	0	0	0	0	0	0	0	0	0	0	0	0	0	0	0	0	0	0
Ixabepilone	0	0	0	0	0	0	0	0	0	0	0	0	0	0	0	0	0	0	0	0	0	0	2.991195464	0	0	0	0	0	0.74906367	0.7390983	0	0	0	0	0	0	0	0	0	0	0	0.7390983	0	0	0	0	0	0	0
Ixazomib_(MLN9708)	0	0	0	0	1.371006199	1.650165017	0	0	0	0	0	0	0	0	0	0	0	0	0	0	0	0	1.377410468	0	0	0	0	0	0	0	0	0	0	0	0	0	0	0	0	0	0	0	0	0	0	0	0	0	0
Lapatinib	0	0	0	0	0	0	0	0	0	0	0	0	0.645540332	0	0	0	0.532569551	0.532569551	0	0	0	0	1.500880048	0	0	0	0	0	0	0.266284775	0	0	0	0	0	0	0	0	0	0	0	0	0	0	0	0	0	0	0
Lenalidomide	0	0	0	0	0	0	0	0	0	0	0	0	0	0	0	0	0	0	0	0	0	0	0	0	0	0	0	0	0	0	0	0	0	0	0	0	0	0	0	0	0	0	0	0	0	0	0	0	0
Lenvatinib	0	0	0	0.846881661	0	0.245639892	0	0	0	0	0.341180484	0	0	0	0	0	0	0	0	0	0	0.607146847	2.421191192	0	0	0	0	0	0.822011645	0.303573423	0	0	0	0	0	0	0	0	0	0	0	0	0	0	0	0	0	0	0
Letrozole	0	0	0	0	0	0	0	0	0	0	0	0	0	0	0	0	0	0	0	0	0	0	0	0	0	0	0	0	0	0	0	0	0	0	0	0	0	0	0	0	0	0	0	0	0	0	0	0	0
Leuprolide	0	0	0	0	0	0	0	0	0	0	0	0	0	0	0	0	0	0	0	0	0	0	1.013171226	0	0	0	0	1.013171226	0	0	0	0	0	0	0	0	0	0	0	0	0	0	0	0	0	0	0	0	0
Lomustine	0	0	0	0	0	0	0	0	0	0	0	0	0	0	0	0	0	0	0	0	0	0	2.864545615	0	0	0	0	0	0	0	0	0	0	0	0	0	0	0	0	0	0	0	0	0	0	0	0	0	0
Masitinib	0	1.957527911	0	0	0	0.80345255	0	0	0	0	0.341180484	0	0.645540332	0	0	0	1.410576906	2.222687948	0	0.612745098	0	0	9.819624086	0.605344093	0.30422997	0.80345255	0.377517388	2.378555864	0.620732464	0.266284775	0	0	0	0	0	0	0	0	0	0	0	0	0	0	0.783810745	0	0.377517388	0	0
Medroxyprogesterone_acetate_(MPA)	0	0	0	0	1.238465367	0	0	0	0	0	0	0	0	0	0	0	0	0.976120621	0	0	0	0	1.333008558	0.619232683	0	0.619232683	0	0	0	0	0	0	0	0	0	0	0	0	0	0	0	0	0	0	0	0	0	0	0
Megestrol	0	0	0	0	0	0	0	0	0	0	0	0	0	0	0	0	0	0.356887937	0	0	0	0	0.713775874	0	0	0	0	0	0	0	0	0	0	0	0	0	0	0	0	0	0	0	0	0	0	0	0	0	0
Methyltestosterone	0	0	0	0	0	0	0	0	0	0	0	0	0	0	0	0.390931928	0	0	0	0	0	0	0.781863855	0	0	0	0	0	0	0.781863855	0	0	0	0	0	0	0	0	0	0	0	0	0	0	0	0	0	0	0
Midostaurin	0	0	0	0	0	0	0	0	0	0	0	0	0	0	0	0	0	0	0	0	0	0	0	0	0	0	0	0	0	0	0	0	0	0	0	0.670690812	0	0	0	0	0	0	0	0	0	0	0	0	0
Mogamulizumab	0	0	0	0	0	0	0	0	0	0	0	0	0	0	0	0	0	0	0	0	0	0	0	0	0	0	0	0	0	0	0	0	0	0	0	0	0	0	0	0	0	0	0	0	0	0	0	0	0
Moxetumomab_pasudotox	0	0	0	0	0	0	0	0	0	0	0	0	0	0	0	0	0	0	0	0	0	0	0.786163522	0	0	0	0	0	0	0	0	0.393081761	0	0	0	0	0	0	0	0	0	0	0	0	0	0	0	0	0
Necitumumab	0	0	0	0	0	0	0	0	0	0	0	0	0.645540332	0	0	0	0	0	0	0	0	0	0.968310498	0	0	0	0	0	0	0	0	0	0	0	0	0	0	0	0	0	0	0	0	0	0	0	0	0	0
Nilotinib	0	0	0	0	0	0	0	0	0	0	0.341180484	0	0	0	0	0	0.878007355	0.878007355	0	0	0	0	0.292669118	0	0	0	0	0	0	0	0	0	0	0	0	0	0	0	0	0	0	0	0	0	0	0	0	0	0
Nilutamide	0	0	0	0	0	0	0	0	0	0	0	0	0	0	0	0.390931928	0	0	0	0	0	0	0.781863855	0	0	0	0	0	0	0.781863855	0	0	0	0	0	0	0	0	0	0	0	0	0	0	0	0	0	0	0
Nimotuzumab	0	0	0	0	0	0	0	0	0	0	0	0	0.645540332	0	0	0	0	0	0	0	0	0	0.968310498	0	0	0	0	0	0	0	0	0	0	0	0	0	0	0	0	0	0	0	0	0	0	0	0	0	0
Nintedanib_(BIBF_1120)	0	1.272361758	0	0.846881661	0	0.245639892	0	0	0	0	0	0	0	0	0	0	0	0	0	0	0	0	2.421191192	0.301114122	0	0	0	0	1.442744109	0	0	0	0	0	0	0.670690812	0	0	0	0	0	0	0	0	0	0	0	0	0
Niraparib	0	0	0	0	1.513984384	0.334364584	0	0	0	0	0	0	0	0	0	0	0	0	0	0	0	0	1.179619799	0	0	0	0	0	0	0	0	0	0	0	0	0	0	0	0	0	0	0	0	0	0	0	0	0	0
Nivolumab_(BMS-936558)	0	0	0	0	0	0	0	0	0	0	0	0	0	0	0	0	0	0	0	0	0	0	1.153402537	0	0	0	0	0	0	0	0	0	0	0	0	0	0	0	0	0	0	0	0	0	0	0	0	0	0
Obinutuzumab	0	0	0	0	0	0	0	0	0	0	0	0	0	0	0	0	0	0	0	0	0	0	0	0	0	0	0	0	0	0	0	0	0	0	0	0	0	0	0	0	0	0	0	0	0	0	0	0	0
Ofatumumab	0	0	0	0	0	0	0	0	0	0	0	0	0	0	0	0	0	0	0	0	0	0	0	0	0	0	0	0	0	0	0	0	0	0	0	0	0	0	0	0	0	0	0	0	0	0	0	0	0
Olaparib	0	0	0	0	0.334364584	0.334364584	0	0	0	0	0	0	0	0	0	0	0	0	0	0	0	0	0.285632676	0	0	0	0	0	0	0.285632676	0	0	0	0	0	0	0	0	0	0	0	0	0	0	0	0	0	0	0
Olaratumab	0	0	0	0	0	0	0	0	0	0	0	0	0	0	0	0	0	0	0	0	0	0	0.305810398	0	0	0	0	0	0	0	0	0	0	0	0	0	0	0	0	0	0	0	0	0	0	0	0	0	0
Osimertinib	0	0	0	0	0	0	0	0	0	0	0	0	0.645540332	0	0	0	0	0	0	0	0	0	0.968310498	0	0	0	0	0	0	0	0	0	0	0	0	0	0	0	0	0	0	0	0	0	0	0	0	0	0
Paclitaxel	0	0	0	0	0.208560424	0	0	0	0	0	0	0	0	0	0	0	0	0	0	0	0	0	4.624257313	0	0	0	0	0	0.74906367	1.172243309	0	0	0	0	0	0	0	0	0	0	0	0.7390983	0	0	0	0	0	0	0
Palbociclib	0	0	0	0	0	0	0	0	0	0	0	0	0	0	0	0	0	0	0	0	0	0	1.096491228	1.019367992	0	0	0	0	0	0	0	0	0	0	0	0	0	0	0	0	0	0	0	0	0	0	0	0	0
Panitumumab	0	0	0	0	0	0	0	0	0	0	0	0	0.645540332	0	0	0	0	0	0	0	0	0	0.968310498	0	0	0	0	0	0	0	0	0	0	0	0	0	0	0	0	0	0	0	0	0	0	0	0	0	0
Panobinostat	0.921556477	0	1.21681342	0	0.957854406	2.499088852	0	0	0	0	0.723518863	0	0	0	0	0	0	0	0	0	0	1.21681342	3.080659533	0	0.723518863	0	0	1.447037727	0	0.580553741	0	0	0	0	0	0	0	0	0	0	0	0	0	0	0	0	0	0	0
Pazopanib	0	0	0	0	0	0.245639892	0	0	0	0	0.341180484	0	0	0	0	0	0	0	0	0	0	0	1.981176348	0.301114122	0	0	0	0	0.822011645	0	0	0	0	0	0	0	0	0	0	0	0	0	0	0	0	0	0	0	0
Pembrolizumab	0	0	0	0	0	0	0	0	0	0	0	0	0	0	0	0	0	0	0	0	0	0	1.153402537	0	0	0	0	0	0	0	0	0	0	0	0	0	0	0	0	0	0	0	0	0	0	0	0	0	0
Perifosine	0	0	0	0	0	0.691562932	0	0	0	0	0	0	0	0	0	0	0	0	0	0	0	0	0.691562932	0	0.693000693	0	0	0	0	0	0	0	0	0	0	0	0	0	0	0	0	0	0	0	0	0	0	0	0
Pertuzumab	0	0	0	0	0	0	0	0	0	0	0	0	0	0	0	0	0.532569551	0.532569551	0	0	0	0	0.532569551	0	0	0	0	0	0	0.266284775	0	0	0	0	0	0	0	0	0	0	0	0	0	0	0	0	0	0	0
Pomalidomide	0	0	0	0	0	0	0	0	0	0	0	0	0	0	0	0	0	0	0	0	0	0	1.424501425	0	0	0	0	0	0	0	0	0	0	0	0	0	0	0	0	0	0	0	0	0	0	0	0	0	0
Ponatinib	0.277755196	0	0	0	0	0	0	0	0	0	0	0	0	0	0	0	0.878007355	0.878007355	0	0	0	0	0.570424314	0	0	0	0	0	0	0	0	0	0	0	0	0	0	0	0.555510392	0	0	0	0	0	0	0	0	0	0
Ramucirumab_(Cyramza)	0	0	0	0	0	0.245639892	0	0	0	0	0	0	0	0	0	0	0	0	0	0	0	0	0.491279784	0	0	0	0	0	0	0	0	0	0	0	0	0	0	0	0	0	0	0	0	0	0	0	0	0	0
Regorafenib	0	0	0	0	0	1.440228189	0	0	0	0	0.341180484	0	0	0	0	0	0.878007355	1.31260101	0	0	0	0.607146847	4.755688897	0.301114122	0.507321169	0	0	1.014642339	0.822011645	0.303573423	0	0	0	0	0	0.670690812	0	0	0	0	0	0	0	0	0.592592593	0	0	0	0
Ribociclib	0	0	0	0	0	0	0	0	0	0	0	0	0	0	0	0	0	0	0	0	0	0	1.096491228	1.019367992	0	0	0	0	0	0	0	0	0	0	0	0	0	0	0	0	0	0	0	0	0	0	0	0	0
Rigosertib	0	0	0	0	0	0.55187638	0	0	0	0	0	0	0	0	0	0	0	0.55187638	0	0	0	0	0.55187638	0	0	0	0	0	0	0	0	0	0	0	0	0	0	0	0	0	0	0	0	0	0	0	0	0	0
Rituximab	0	0	0	0	0	0	0	0	0	0	0	0	0	0	0	0	0	0	0	0	0	0	0	0	0	0	0	0	0	0	0	0	0	0	0	0	0	0	0	0	0	0	0	0	0	0	0	0	0
Romidepsin	0.921556477	0	1.21681342	0	0	1.541234446	0	0	0	0	0.723518863	0	0	0	0	0	0	0	0	0	0	1.21681342	3.080659533	0	0.723518863	0	0	1.447037727	0	0.580553741	0	0	0	0	0	0	0	0	0	0	0	0	0	0	0	0	0	0	0
Rucaparib	0	0	0	0	1.513984384	0.334364584	0	0	0	0	0	0	0	0	0	0	0	0	0	0	0	0	1.179619799	0	0	0	0	0	0	0	0	0	0	0	0	0	0	0	0	0	0	0	0	0	0	0	0	0	0
Ruxolitinib	0	0	0	0	0.294204178	0	0	0	0	0	0	0	0	0	0	0	0	0	0.294204178	0	0	0	0.288600289	0	0	0	0	0	0	0	0	0	0	0	0	0	0	0	0	0	0	0	0	0	0	0	0	0	0
Selumetinib	0	0	0	0	0.846023689	0	0	0	0	0	0	0	0	0	0	0	0	0	0	0	0	0	0.846023689	0	0	0	0	0	0	0	0	0	0	0	0	0	0	0	0	0	0	0	0	0	0	0	0	0	0
Siltuximab	0	0	0	0	0	0	0	0	0	0	0	0	0	0	0	0	0	0	0	0	0	0	2.911208151	0	0	0	0	0	0	0	0	0	0	0	0	0	0	0	0	0	0	0	0	0	0	0	0	0	0
Sonidegib_(LDE225)	0	0	0	0	0	0.423011844	0	0	0	0	0	0	0	0	0	0	0	0	0	0	0	0	0.423011844	0	0	0	0	0	0	0	0	0	0	0	0	0	0	0	0	0	0	0	0	0	0	0	0	0	0
Sorafenib	0	0	0	0	0	0.245639892	0	0	0	0	0.341180484	0	0	0	0	0	0	0.434593655	0	0	0	0.607146847	3.564616788	0.301114122	0.507321169	0	0	1.014642339	0.822011645	0.303573423	0	0	0	0	0	0.670690812	0	0	0	0	0	0	0	0	0	0	0	0	0
Sunitinib	0	0.685166153	0	0	0	0.245639892	0	0	0	0	0.341180484	0	0	0	0	0	0	0	0	0	0	0	2.666342501	0.301114122	0	0	0	0	0.822011645	0	0	0	0	0	0	0.670690812	0	0	0	0	0	0	0	0	0	0	0	0	0
Tamoxifen	0	0	0	0	1.238465367	0	0	0	0	0	0	0	0	0	0	0	0	0.619232683	0	0	0	0	0.619232683	0.619232683	0	0.619232683	0	0	0	0	0	0	0	0	0	0	0	0	0	0	0	0	0	0	0	0	0	0	0
Tecemotide_(Emepepimut-S_L-BLP25)	0	0	0	0	0	0	0	0	0	0	0	0	0	0	0	0	0	0	0	0	0	0	0	0	0	0	0	0	0	0	0	0	0	0	0	0	0	0	0	0	0	0	0	0	0	0	0	0	0
Temozolomide	0	0	0	0	0	0	0	0	0	0	0	0	0	0	0	0	0	0	0	0	0	0	2.864545615	0	0	0	0	0	0	0	0	0	0	0	0	0	0	0	0	0	0	0	0	0	0	0	0	0	0
Temsirolimus	0	0	0	0	0	0.130718954	0	0	0	0	0	0	0	0	0	0	0	0.130718954	0	0	0	0	0.130718954	0	0	0	0	0	0	0	0	0	0	0	0	0	0	0	0	0	0.130718954	0	0	0	0	0	0	0	0
Thalidomide	0	0	0.357807357	0	0	0	0	0	0	0	0	0	0	0	0	0	0	0	0	0	0	0	1.782308781	0	0	0	0	0	0	0	0	0	0	0	0	0	0	0	0	0	0	0	0	0	0	0	0	0	0
Tivantinib	0	0	0.236574403	0.236574403	0	2.011862538	0	0	0	0	0	0	0	0	0	0	0	0.670620846	0	0	0	0	1.135160545	0	0.236574403	0	0	0	1.996317209	0	0	0	0	0	0	0	0	0	0	0	0	0	0	0	0	0	0	0	0
Tivozanib	0	0	0	0	0	0.245639892	0	0	0	0	0	0	0	0	0	0	0	0	0	0	0	0	1.675365951	0	0	0	0	0	0.822011645	0	0	0	0	0	0	0	0	0	0	0	0	0	0	0	0	0	0	0	0
Toremifene	0	0	0	0	1.238465367	0	0	0	0	0	0	0	0	0	0	0	0	0.619232683	0	0	0	0	0.619232683	0.619232683	0	0.619232683	0	0	0	0	0	0	0	0	0	0	0	0	0	0	0	0	0	0	0	0	0	0	0
Trametinib_(Mekinst)	0	0	0	0	0.846023689	0	0	0	0	0	0	0	0	0	0	0	0	0	0	0	0	0	0.846023689	0	0	0	0	0	0	0	0	0	0	0	0	0	0	0	0	0	0	0	0	0	0	0	0	0	0
Trastuzumab	0	0	0	0	0	0	0	0	0	0	0	0	0	0	0	0	0.532569551	0.532569551	0	0	0	0	0.532569551	0	0	0	0	0	0	0.266284775	0	0	0	0	0	0	0	0	0	0	0	0	0	0	0	0	0	0	0
Trebananib	0	0.669344043	0	0	0	0	0	0	0	0	0	0	0	0	0	0	0	0	0	0	0	0	0.669344043	0	0	0	0	0	0	0	0	0	0	0	0	0	0	0	0	0	0	0	0	0	0	0	0	0	0
Vandetanib	0	0	0	0	0	0.245639892	0	0	0	0	0	0	0.645540332	0	0	0	0	0	0	0	0	0	1.459590281	0	0	0	0	0	0	0	0	0	0	0	0	0	0	0	0	0	0	0	0	0	0	0	0	0	0
Veliparib	0	0	0	0	0	0	0	0	0	0	0	0	0	0	0	0	0	0	0	0	0	0.193236715	0	0	0	0	0	0.193236715	0	0	0	0	0	0	0	0	0	0	0	0	0	0	0	0	0	0	0	0	0
Vemurafenib	0	0	0	0	0	0	0	0	0	0	0	0	0	0	0	0	0	0.434593655	0	0	0	0	0.434593655	0	0	0	0	0	0	0	0	0	0	0	0	0	0	0	0	0	0	0	0	0	0	0	0	0	0
Venetoclax	0	0	0	0	0	0	0	0	0	0	0	0	0	0	0	0	0	0	0	0	0	0	0	0	0	0	0	0	0	0	0	0	0	0	0	0	0	0	0	0	0	0	0	0	0	0	0	0	0
Vinblastine	0	0	0	0	0	0	0	0	0	0	0	0	0	0	0	0	0	0	0	0	0	0	0.829703381	0	0	0	0	0	0	0	0	0	0	0	0	0	0	0	0	0	0	0	0	0	0	0	0	0	0
Vincristine	0	0	0	0	0	0	0	0	0	0	0	0	0	0	0	0	0	0	0	0	0	0	2.991195464	0	0	0	0	0	0.74906367	0.7390983	0	0	0	0	0	0	0	0	0	0	0	0.7390983	0	0	0	0	0	0	0
Vindesine	0	0	0	0	0	0	0	0	0	0	0	0	0	0	0	0	0	0	0	0	0	0	2.991195464	0	0	0	0	0	0.74906367	0.7390983	0	0	0	0	0	0	0	0	0	0	0	0.7390983	0	0	0	0	0	0	0
Vinorelbine	0	0	0	0	0	0	0	0	0	0	0	0	0	0	0	0	0	0	0	0	0	0	2.991195464	0	0	0	0	0	0.74906367	0.7390983	0	0	0	0	0	0	0	0	0	0	0	0.7390983	0	0	0	0	0	0	0
Vismodegib	0	0	0	0	0	0.423011844	0	0	0	0	0	0	0	0	0	0	0	0	0	0	0	0	0.423011844	0	0	0	0	0	0	0	0	0	0	0	0	0	0	0	0	0	0	0	0	0	0	0	0	0	0
Vorinostat	0.921556477	0	1.21681342	0	0.957854406	2.499088852	0	0	0	0	0.723518863	0	0	0	0	0	0	0	0	0	0	1.21681342	3.080659533	0	0.723518863	0	0	1.447037727	0	0.580553741	0	0	0	0	0	0	0	0	0	0	0	0	0	0	0	0	0	0	0
[truncated: 3,751 more columns]
