# Supplementary material for: Pathway Based Analysis of Mutation Data Is Efficient for Scoring Target Cancer Drugs
Source: Front Pharmacol. 2019 Jan 23;10:1. doi: 10.3389/fphar.2019.00001 (PMC6351482; doi:10.3389/fphar.2019.00001)
Supplement: Supplementary Data Sheet 3 — Mutation drug scores for 3800 TCGA tumor samples for 10 versions of drug scoring algorithm. The dataset contains 10 tables that match the 10 methods of drug scoring. [file Data_Sheet_3.ZIP › MDS_b.csv]

	TCGA.AG.3881.01	TCGA.63.6202.01	TCGA.MH.A561.01	TCGA.DZ.6135.01	TCGA.BR.8368.01	TCGA.HU.A4GQ.01	TCGA.36.1571.01	TCGA.19.5953.01	TCGA.41.2573.01	TCGA.CZ.4865.01	TCGA.A4.A57E.01	TCGA.02.0114.01	TCGA.81.5911.01	TCGA.27.2526.01	TCGA.BP.4351.01	TCGA.B8.5159.01	TCGA.IN.8663.01	TCGA.AH.6644.01	TCGA.CM.5344.01	TCGA.AA.3685.01	TCGA.EI.6508.01	TCGA.AA.3697.01	TCGA.AA.3977.01	TCGA.AG.A02X.01	TCGA.DC.4745.01	TCGA.AA.3494.01	TCGA.85.6560.01	TCGA.A6.6782.01	TCGA.D5.6533.01	TCGA.G4.6293.01	TCGA.HT.7873.01	TCGA.DU.7294.01	TCGA.DB.A64R.01	TCGA.FG.6690.01	TCGA.DU.6542.01	TCGA.HT.8109.01	TCGA.DU.A5TW.01	TCGA.HT.7877.01	TCGA.HW.8322.01	TCGA.HT.7695.01	TCGA.DU.6393.01	TCGA.QH.A65Z.01	TCGA.HT.8106.01	TCGA.DB.A64P.01	TCGA.DB.A64X.01	TCGA.DU.5851.01	TCGA.06.6701.01	TCGA.HT.7879.01	TCGA.FG.7634.01
Abemaciclib_(LY2835219)	57.93826631	64.73722343	12.18928586	3.416872058	62.32934818	121.6826673	8.512875875	3.662599932	5.810614778	34.30731959	26.89372864	27.87542593	10.51004724	3.281107728	6.646994247	4.45912864	46.50130683	53.17759851	6.99443787	62.29784491	52.17023799	45.40573581	475.5011603	76.95356197	55.74675799	31.79489687	44.27506142	63.16980496	42.20637041	22.81274355	0	3.084737215	0.443262411	47.96300082	21.97632798	1.542515097	12.78016024	0.281056773	1.799126019	2.921739738	1.04011428	2.133756828	16.08340329	0.554537253	52.67832582	14.78086792	0.456927104	27.6607906	2.182725288
Afatinib	344.7221849	281.5556323	56.01181882	26.04545588	373.2890807	685.8503921	17.04190928	17.8948992	18.1680842	57.55978291	98.414927	66.15732294	51.08284045	15.15957867	35.70812004	28.88651238	93.07729966	347.7135966	97.15068962	182.0178331	220.2539044	176.7369198	2682.712304	302.7390887	321.467291	125.8291674	198.7440902	296.0690144	185.3122468	120.1902953	4.019947036	12.78616356	5.293367362	104.3973735	49.6886983	13.99141569	86.96783272	8.684240384	4.921416286	20.07421698	6.631887664	9.972777944	32.6512397	12.35540112	149.2120184	35.58369956	11.26559045	63.9165397	18.47552693
Aflibercept	173.4440632	155.6571476	28.99279685	13.84535986	195.2510154	393.4997926	8.869574993	12.37163024	11.17039132	30.75930684	59.01406556	37.30672938	15.97301962	9.323573595	25.15291945	18.68749447	54.39691552	182.9948455	53.13836254	107.9603372	126.2427555	108.1680541	1632.349491	155.95172	191.2386214	66.62490088	124.9323388	173.2580084	102.2670931	68.36335067	1.131321386	7.488678338	2.517111801	55.5368616	26.84836198	6.531558204	60.78435536	4.515081733	1.832182753	16.28097742	3.607714708	5.423730571	17.33301936	10.56770985	77.26714405	19.81215101	8.593225108	32.77164752	9.825370991
Alectinib	229.0839922	243.5101397	40.14858349	17.46649909	281.5912368	575.9716042	14.58357654	20.06656974	14.95784664	52.29010613	91.84127305	65.15181077	21.93046486	14.94320483	31.06140305	14.39959235	77.15326215	240.3413635	83.36668841	178.256429	182.9993703	172.6932993	2415.31937	227.0931981	272.478742	112.1935353	211.419871	280.1982712	148.1678386	93.35983986	1.31845831	16.69697513	0.886524823	97.3277398	43.75072961	18.19055977	78.12291167	5.127228764	1.127657723	20.59902895	3.342192506	8.369613647	30.66694899	14.0560691	127.9114572	34.4282937	16.93196715	53.82029773	8.084230161
Alemtuzumab	0.998521599	0	0	0	5.810723994	8.888384565	0	0	0	0	0	0	0	0.154607297	1.995491172	0	1.262906236	6.841155553	0	0	3.669354092	2.927644071	30.98618262	2.91781879	3.035886882	0	3.838075624	1.870693669	0	1.769447691	0	0	0	0	0	0	0	0	0	0	0	0.49382716	0	0	0.938967136	0	0	0	0
Alitretinoin	9.243023769	6.817082962	2.159033606	0.440010155	7.804060826	17.28471507	0.694456025	0.250746954	0.265444542	2.969756638	3.52635774	2.661731811	0.9859629	0.25934611	1.224701418	0.857632892	1.396294839	8.332923497	1.436181478	8.225468954	6.891483922	4.741206279	80.50092802	8.777276322	8.86434239	3.260456965	5.938859081	7.240907185	5.213161066	5.02603554	0.232450023	0	0.076522804	4.560688771	2.168881706	0.946958488	2.931730238	0	0	0.47942957	0.043572985	0.839012403	1.76813086	0.836623105	6.328676572	1.537060199	0.044694735	2.705560595	0.604211675
Apalutamide_ARN-509	42.27741055	44.62014291	16.2868338	1.083456063	55.13481714	113.860254	4.166736153	3.870797702	1.773925183	16.13647249	16.63046735	17.29756566	4.470367503	4.371857022	2.730924114	9.381198024	13.06579424	35.30952392	15.72206412	54.78998348	37.47866801	43.39607018	438.6490184	52.25106505	54.57668578	21.2191711	39.26988868	47.92263493	40.85766081	36.73692775	0.309214595	3.779099354	0	27.86196614	13.63786489	1.308353282	8.72971375	1.124227094	0.661238751	3.466873684	0.985767551	1.895688816	11.87790142	7.479071349	37.32203596	9.811307415	5.851804851	14.58357654	2.471507991
Arsenic_trioxide	91.13295914	92.93694564	20.7016259	6.246122709	103.7687622	227.2222926	9.281528967	6.160155178	6.707799321	34.78522133	33.35766274	33.58944079	11.53785471	5.622697991	9.071903949	9.312152582	42.90575962	85.65805184	25.87463594	87.31632761	78.69149764	68.33350889	816.5199734	102.8817178	96.50698113	43.4548528	70.22808962	96.44492091	63.54161186	42.20676098	0.604152189	6.617835752	2.040787263	56.05156579	25.35362462	5.697999546	22.99182973	0.936279431	2.278411987	5.283024957	3.435260721	6.753198598	21.94125399	2.494446388	68.04499819	18.83011012	6.097110172	33.64152602	6.449530472
Atezolizumab	0	1.272361758	0	0	0.726216412	0	0	0	0	0	0	0	0	0	0	0	0.84227414	0	0	0	1.216545012	0	7.918886129	0	0	0	0	0	0	0.84227414	0	0	0	0	0	0	0	0	0	0	0	0	0	0	0	0	0	0	0
Avelumab	0	1.272361758	0	0	0.726216412	0	0	0	0	0	0	0	0	0	0	0	0.84227414	0	0	0	1.216545012	0	7.918886129	0	0	0	0	0	0	0.84227414	0	0	0	0	0	0	0	0	0	0	0	0	0	0	0	0	0	0	0
Axitinib	160.1294008	138.0005157	26.74247095	14.84995778	179.7675571	371.0465372	7.281539087	9.662430764	9.435379045	25.63916166	49.92818167	31.84090859	15.31983091	8.02771884	20.43241813	15.76104151	43.77985204	170.0992979	47.71337471	99.41448954	116.0107838	93.29447148	1483.50706	142.3062267	171.086088	63.29485383	111.7515063	156.28254	96.72069626	64.88844762	1.596221432	6.245367888	2.364066194	46.35450783	22.44122087	7.60485108	52.497486	4.34294988	1.45824407	14.20203831	3.146610913	4.986945962	15.00920838	7.23333517	69.76643528	16.8064648	7.617622577	29.74490587	8.723222755
Belinostat	13.18323456	20.17710325	6.687206566	0.915634788	16.2362745	46.15328854	4.976590584	0.455886929	0.822287501	15.52022552	15.38798619	18.08417185	1.362611706	0.269325178	0.699756498	1.330607763	12.67497996	12.36735054	3.238795165	37.11020178	23.68705587	27.56193912	155.3123728	24.14949809	24.30326816	16.37977495	21.89440121	28.9536355	20.44479512	7.243500086	0.308322405	0.394820761	0.080593166	29.81846906	14.30384483	1.49892227	5.700269749	0.406595342	0.764925624	0.336700662	0.408821987	0.52973528	10.82595141	0.06499963	28.09322121	9.171868778	0.194031288	16.09801857	0.300585883
Bevacizumab	520.3321897	466.9714427	86.97839055	41.53607957	585.7530463	1180.499378	26.60872498	37.11489073	33.51117396	92.27792051	177.0421967	111.9201881	47.91905887	27.97072078	75.45875835	56.06248342	163.1907466	548.9845364	159.4150876	323.8810116	378.7282664	324.5041623	4897.048473	467.8551601	573.7158643	199.8747026	374.7970163	519.7740251	306.8012793	205.090052	3.393964157	22.46603501	7.551335404	166.6105848	80.54508595	19.59467461	182.3530661	13.5452452	5.496548258	48.84293225	10.82314412	16.27119171	51.99905809	31.70312956	231.8014322	59.43645302	25.77967532	98.31494257	29.47611297
Bexarotene	16.14034608	12.29460685	4.198798093	0.880020311	14.15326303	33.65528334	1.388912051	0.501493908	0.530889084	5.939513275	6.938988653	5.323463623	1.888634113	0.51869222	2.449402835	1.507387185	2.792589677	14.28365789	2.872362955	16.45093791	13.78296784	9.482412559	156.9967358	15.79527655	17.08298334	6.52091393	11.66983956	14.14360026	9.78031871	9.844192482	0.464900046	0	0.153045608	9.121377542	4.337763413	1.670353373	5.863460476	0	0	0.95885914	0.043572985	1.678024806	3.53626172	1.524303702	12.14827789	3.074120398	0.08938947	5.41112119	1.000544752
Bicalutamide	42.27741055	44.62014291	16.2868338	1.083456063	55.13481714	113.860254	4.166736153	3.870797702	1.773925183	16.13647249	16.63046735	17.29756566	4.470367503	4.371857022	2.730924114	9.381198024	13.06579424	35.30952392	15.72206412	54.78998348	37.47866801	43.39607018	438.6490184	52.25106505	54.57668578	21.2191711	39.26988868	47.92263493	40.85766081	36.73692775	0.309214595	3.779099354	0	27.86196614	13.63786489	1.308353282	8.72971375	1.124227094	0.661238751	3.466873684	0.985767551	1.895688816	11.87790142	7.479071349	37.32203596	9.811307415	5.851804851	14.58357654	2.471507991
Binimetinib_(MEK162)	505.0236035	363.7298635	52.03792018	23.99774669	521.0637041	822.2177535	19.60466804	23.49012806	24.11832007	67.60127566	98.46810306	71.50799077	47.13648743	14.30253193	33.8841716	49.74349376	67.84872919	462.4422896	71.77602894	242.6997796	252.1221362	206.902633	2999.911702	412.0824871	347.4465075	124.365977	203.1605941	362.997447	218.9915216	150.3149814	6.748500338	18.30469875	7.493805007	118.5915677	56.30883484	12.10923715	73.95319926	11.43849228	4.870463608	22.98948608	7.840821681	13.95973732	37.43889703	17.40240596	228.646532	40.50344335	11.77861259	73.19904161	37.22876195
Blinatumomab	64.48306813	77.02173524	9.724871153	2.515326115	75.96426022	138.2367426	4.465421936	5.168779197	3.481795114	13.20047881	21.55534788	17.59442872	7.197358626	4.510066851	5.889568557	6.770796292	13.61349963	63.24778372	15.29802498	46.31773145	53.09540231	46.84771673	662.6864535	54.43713313	64.28080942	26.57841628	47.8621926	66.5752519	41.11965811	27.66981468	0.154607297	2.475505926	0.443262411	27.36413263	12.50020846	3.425816785	17.42667695	1.405283867	0	3.909541253	1.477320374	1.737515214	9.116966838	5.28859233	32.70271576	10.25575186	6.59616253	15.00907532	5.945665986
Bortezomib	6.778638824	9.609392946	1.151155775	0.498634477	13.26400798	34.5124803	1.29253606	1.199216812	1.014333571	6.818107027	4.629149032	4.934269836	0.903258968	0.914806875	1.764749398	1.011641142	3.339511633	6.363025961	2.51242386	10.03054143	8.461718206	8.625165669	137.0882518	10.3602	15.3462512	5.332594943	15.05592825	10.14408527	7.92842356	5.569349944	0.089677915	7.147569516	0.052148519	8.210819155	3.718956305	0.260740237	3.250392982	0.109006026	0.105054993	0.528375848	0.271985589	0.303408598	2.835488779	0.275644182	8.220061662	2.740540244	0.410676261	4.289287216	0.183422293
Bosutinib	200.6549523	208.1663879	32.82656349	14.5427367	238.0465566	473.0368318	20.58699687	13.45664146	13.20326417	68.53526635	78.64325354	84.59749741	22.4320109	10.15615785	18.16245278	21.81093704	74.83621439	212.2348106	45.4484187	212.9177941	171.2692446	157.081506	1714.321118	215.6565779	213.919668	96.43486837	153.815835	221.7918019	162.0998682	85.71526443	3.398871374	19.87616764	4.432624113	127.1633748	59.3035333	7.925697685	47.17835456	6.206246227	3.464597615	13.08449355	3.913062653	7.018330576	41.19994948	10.02858772	153.8654211	41.07338161	8.789457405	70.69803926	14.48225588
Brentuximab_vedotin	60.76206281	68.00295156	9.531860591	2.640060932	77.86979988	116.2971204	4.166736153	5.225811252	2.658248651	12.99214548	20.95872654	17.20058508	6.593659084	4.128192305	4.014875172	2.393049845	12.4074316	51.44815419	14.44343433	59.59381754	45.61957869	53.84560505	568.6764293	59.53903273	55.70367589	24.31004531	47.28952678	69.67971277	33.0564062	19.91312073	0	3.378684807	0	27.36413263	12.50020846	5.273004022	15.73469379	0.562113547	0	8.681041024	0.130718954	0.999631468	9.605736937	9.968131081	34.03922284	9.811307415	12.50465502	14.58357654	1.224236397
Brigatinib	342.4737641	280.441267	52.09258903	25.50433034	366.0123074	672.6857362	17.04190928	17.77297771	18.1680842	57.55978291	98.414927	66.15732294	50.95790292	15.15957867	35.70812004	27.02504263	88.98740656	339.4244108	88.25722734	182.0178331	216.9834758	175.4197299	2649.091555	301.2315721	316.6149403	124.9738637	196.3717958	295.7985162	182.5246787	117.2985104	3.478235227	12.78616356	5.293367362	104.3973735	49.6886983	12.14422845	86.16655067	8.684240384	4.921416286	20.07421698	6.50116871	9.972777944	32.6512397	12.35540112	148.052591	35.58369956	11.26559045	62.95314856	17.22825534
Cabazitaxel	0.405923395	0.519180625	0	0.397332186	1.316397931	3.191718777	0	0	0.063185954	0.193837652	0.03088375	0	0.080651645	0	0.127720178	0.145024751	0.157612505	1.62626983	0.035077359	0.372783508	0.923211865	0.459358987	11.97506245	0.779598112	0.615823623	0.296729698	0.224595233	0.71410966	0.595565632	1.004708244	0.030921459	0	0.177304965	0	0	0	0	0	0.082056181	0	0.153517386	0.480413895	0	0	0.649976122	0	0.018875869	0	0.03118179
Cabozantinib	190.1281477	161.8272964	35.02766756	19.50960704	210.6942552	424.1911089	9.972360804	11.54436739	11.34421197	32.77137291	58.66349961	41.16196965	20.62335155	9.471263057	23.8213407	18.82311325	54.27876877	194.8956557	51.53902552	119.7997873	133.9567493	112.6507692	1670.385003	168.3216777	195.3904572	72.09971528	126.6167499	178.3410185	111.6162225	77.55015849	1.863959049	9.767419486	4.119928123	60.25758716	28.95906271	8.319715904	57.57254735	5.227380043	3.058593861	16.22927438	3.961950305	5.551494414	19.44368215	9.948140062	86.47879812	21.50399374	9.68829009	37.30443176	11.69338216
Carfilzomib	36.21567463	41.63689633	6.52321606	2.825595371	74.13478087	180.9369616	3.852090881	6.795561933	5.747890235	28.21909944	15.81500413	15.80788196	5.118467484	5.183905623	10.00024659	3.136579138	8.89805946	35.6191651	14.23706854	36.00605399	34.51895083	36.44376574	730.016275	43.73183365	74.70769972	19.80119763	73.1639463	44.89983978	34.17948094	31.55964968	0.508174853	40.50289393	0.295508274	23.95815438	10.41684038	1.477528012	12.42468445	0.187371182	0.595311627	2.368151712	1.54125167	1.121943822	9.123209492	1.561983697	25.94387366	8.585167794	2.327165481	12.15298045	1.039392994
Ceritinib_(Zykadia_LDK378)	229.0839922	243.5101397	40.14858349	17.46649909	281.5912368	575.9716042	14.58357654	20.06656974	14.95784664	52.29010613	91.84127305	65.15181077	21.93046486	14.94320483	31.06140305	14.39959235	77.15326215	240.3413635	83.36668841	178.256429	182.9993703	172.6932993	2415.31937	227.0931981	272.478742	112.1935353	211.419871	280.1982712	148.1678386	93.35983986	1.31845831	16.69697513	0.886524823	97.3277398	43.75072961	18.19055977	78.12291167	5.127228764	1.127657723	20.59902895	3.342192506	8.369613647	30.66694899	14.0560691	127.9114572	34.4282937	16.93196715	53.82029773	8.084230161
Cetuximab	684.9475282	560.8825339	104.1851781	51.00866068	732.0246149	1345.371472	34.08381856	35.54595543	36.3361684	115.1195658	196.829854	132.3146459	101.9158058	30.31915735	71.41624007	54.05008527	177.9748131	678.8488217	176.5144547	364.0356662	433.9669517	350.8394598	5298.183109	602.4631441	633.2298807	249.9477273	392.7435916	591.5970323	365.0493574	234.5970207	6.956470454	25.57232711	10.58673472	208.7947469	99.37739659	24.2884569	172.3331013	17.36848077	9.842832571	40.14843396	13.00233742	19.94555589	65.30247941	24.71080224	296.1051821	71.16739913	22.53118091	125.9062971	34.45651068
Cobimetinib	505.0236035	363.7298635	52.03792018	23.99774669	521.0637041	822.2177535	19.60466804	23.49012806	24.11832007	67.60127566	98.46810306	71.50799077	47.13648743	14.30253193	33.8841716	49.74349376	67.84872919	462.4422896	71.77602894	242.6997796	252.1221362	206.902633	2999.911702	412.0824871	347.4465075	124.365977	203.1605941	362.997447	218.9915216	150.3149814	6.748500338	18.30469875	7.493805007	118.5915677	56.30883484	12.10923715	73.95319926	11.43849228	4.870463608	22.98948608	7.840821681	13.95973732	37.43889703	17.40240596	228.646532	40.50344335	11.77861259	73.19904161	37.22876195
Crizotinib	144.2627628	135.3388879	26.68230852	14.20143376	174.8737448	334.3491389	9.910394269	8.776904477	9.17173476	31.65654472	51.65571709	37.51676301	16.62521138	6.862667185	18.02828377	11.72585009	43.50877374	153.4827144	40.22620584	104.0189646	110.6836664	94.60556997	1312.473845	141.7986789	154.4320628	67.15695056	102.6393171	148.0959841	85.03684814	58.80229356	2.109403758	6.978320686	2.646683681	58.84084849	27.96940126	7.36358782	43.891441	4.419879089	2.040568022	11.8411349	3.360027057	5.474177714	19.22598139	7.494491412	77.24873975	20.20226188	7.089717695	34.41309565	7.366856076
CYT387_(Momelotinib)	174.3630003	118.065872	18.87716917	4.802402683	153.4783308	286.0157661	5.191995748	6.906266735	6.186958811	17.22196792	26.60345694	18.77560376	14.63343273	5.140348428	11.01112491	24.41413123	24.22990512	150.5869866	32.45852675	91.19750932	94.23604278	76.33840045	1091.86924	109.0202875	97.37046935	37.07497175	74.41547485	113.0855035	79.70728839	56.05810091	1.652123804	6.090349547	0.886524823	28.22232343	14.41291643	7.22490862	30.40274845	2.685028755	1.582847525	9.614564877	2.126984615	3.659374005	10.98703129	9.131790112	60.55555287	10.45304324	9.95653143	15.70672026	20.25664579
Dabrafenib	502.2077702	365.8390076	51.35441226	22.15416101	483.8124473	784.9374766	20.04898051	22.27647634	23.67562687	69.74263717	101.5148504	76.11252895	46.20373924	15.66337793	34.31498845	45.26049436	73.84080487	456.120065	73.78999843	240.853492	248.9848315	199.7722377	2960.453884	408.8471301	358.3118537	127.090852	212.8146814	387.4032899	226.4258714	151.3369409	5.998184803	19.015954	6.607280185	124.4412796	59.06385464	13.0987592	76.38385386	10.87637873	3.477887865	22.76100219	7.154511758	14.32487004	40.73458514	19.87434734	220.2186197	42.2894104	14.49978854	73.95476234	32.1512193
Daratumumab	10.59575097	8.339578799	0.7702862	1.543709637	14.7088259	21.99941425	0	0	0.849541825	1.455604076	1.632821372	0	1.403089212	0	0.768049155	2.382737666	0.291120815	13.16994124	0.442673749	5.316179697	12.51747561	4.884993532	106.2559677	7.575810153	12.92675628	3.446034019	7.508794245	7.967492567	4.343742423	3.891593457	0.309214595	0.393081761	0.886524823	0	0	0.670690812	1.221001221	1.124227094	0	0	0	0.268232945	0	0	1.825914281	0.888888889	3.003832046	1.926782274	0.623635797
Dasatinib	122.3983464	118.9896308	17.76027547	9.109201264	134.0059818	257.0365516	10.32891163	7.488766982	7.34686866	34.44566696	41.42423658	42.06393602	13.36543961	6.034451064	10.70924309	13.41629826	39.94115407	127.1307556	26.08964828	106.0497925	97.81426719	80.81660934	967.8187505	116.6293767	119.00618	50.65235883	82.8019905	117.9010459	87.30899923	47.98697517	1.688455109	9.110061488	2.74882034	64.35210267	30.00088132	4.185616621	30.11918613	3.212928555	1.617128379	6.395682727	2.652615146	3.512250761	20.3848269	4.804758912	78.31935475	20.95523186	5.125574652	36.20200952	10.20558007
Degarelix	12.04515336	19.74350877	4.030053529	0	31.71639595	44.73507157	0	2.83492524	2.00884331	2.531707278	0.881834215	0	2.789354788	3.405722933	1.931311843	1.751574937	1.583692752	22.18242437	1.037299631	8.193474722	6.293439659	10.59111816	225.9652835	22.37868007	9.407651735	1.372887865	18.9989638	15.48417741	7.793119577	8.340168928	1.166112624	0.348310693	0	0	2.766407084	3.759703542	2.584940312	1.124227094	0	0.704721635	0.224466891	1.430615165	4.275023202	1.464624936	1.397328923	0	0.249500998	0	2.294327355
Denileukin_diftitox_(Ontac)	177.5971003	144.8144909	20.7550233	12.82034488	186.2555629	332.6506889	8.653032576	6.811215826	5.636251669	25.33514038	51.04448578	29.17989173	14.09179627	4.924349842	16.64182765	11.36132718	37.74460295	165.272349	45.71574108	105.796697	127.5843597	107.1938446	1496.629487	137.9095289	161.4385469	67.94650693	110.4537858	142.3593973	86.27469466	53.87235898	1.731736992	4.596487641	0.886524823	48.30338191	23.01691731	10.33468554	63.05021781	3.38869689	0.785353056	12.33498507	2.650630331	3.775214881	15.46892302	8.940117949	68.45103128	17.11780189	11.1318728	29.54489647	8.095747759
Denosumab	148.6294947	149.1683473	19.78672697	10.32265389	191.8473176	261.419306	8.042218925	11.68350855	7.144385199	20.02492419	55.78313004	26.11525867	8.801727659	5.368646416	11.98935683	9.465854315	35.54052636	143.4208461	43.21047458	107.4479019	91.33953091	128.0390967	1429.455413	138.5062305	148.6388234	41.75428251	109.1214375	141.2343028	71.19277831	56.42729806	1.009243715	3.696145125	2.659574468	41.35801711	18.75031269	6.439870938	35.67108125	1.443511896	0.171732784	11.8468328	2.513423389	1.999262936	13.77247309	28.75900284	52.78650192	15.45587868	10.56720935	24.22764587	8.23810751
Docetaxel	9.173038239	12.96618515	0.322982049	1.975396289	17.92618704	40.84966121	1.666694461	1.202919841	1.149959864	6.21407576	6.686854215	5.977275275	0.969376855	0.048732943	1.675629293	0.908262493	1.943712477	15.44438276	3.450818437	13.52146428	16.35299654	13.57517923	136.0570609	15.78323599	12.54177003	9.202670411	9.734994172	13.27688855	9.854356689	9.767124561	0.377326192	0	0.709219858	10.833514	6.082095257	1.002967573	3.209035289	0	0.162798754	0.187793427	0.758935474	1.77383592	3.333388922	0.053633682	13.3323817	3.333388922	0.254540837	5.918530372	0.374181478
Dovitinib	54.87923769	47.90829522	11.97309195	4.169724272	59.8590549	114.5968674	2.78209128	3.242794217	3.254766876	9.264759717	15.72637532	11.26038171	5.939899985	2.686181606	6.534697895	5.87173334	14.00909224	54.18463492	14.13540234	34.27595353	38.24704971	30.59221909	443.4962555	49.25337063	51.8276385	19.43546256	34.10869045	50.335987	32.35109131	21.59964685	0.505495965	1.942595764	0.811921992	17.03064915	8.125192371	2.927257198	14.01149294	1.808888782	0.741057854	3.834915955	1.129842591	1.745112965	5.630458734	2.142885715	24.26074927	6.15368837	2.489709152	10.70572665	3.897772415
Durvalumab	49.11053468	55.23723082	8.685248808	3.100515859	56.07713255	100.1446079	3.125052115	3.64903752	2.326243339	10.02348284	17.12989693	13.50239005	4.05862933	2.975032103	3.217427006	4.450152845	10.45758225	47.44750847	13.10369756	36.80137582	33.61417038	34.35102416	453.0786724	43.51163507	48.91778452	19.42973536	36.75730452	51.14519053	30.22310923	18.18696052	0.375157767	1.848072562	0.886524823	20.59318638	9.375156344	3.090471379	13.2216699	0.562113547	0	3.440057685	0.492883775	0.999631468	6.886236545	5.28859233	24.1907714	7.283494894	4.15594015	11.46272212	2.794843487
Elotuzumab	2.470589136	3.258507103	0	0	3.835512297	9.759947894	0	1.389318337	0	0	0	0.674210342	2.224704114	0	0.666666667	0	0.200320513	4.051745068	0.736322804	0	0.689941583	4.115879742	64.67799236	3.58349794	0.732600733	1.020979792	3.440154165	1.51457985	1.494797329	1.743848091	0	0.393081761	0	0	0	0	0	0	0	0	0	0	0	0	0.40063004	0.888888889	1.876612714	0	1.401148942
Enzalutamide	42.27741055	44.62014291	16.2868338	1.083456063	55.13481714	113.860254	4.166736153	3.870797702	1.773925183	16.13647249	16.63046735	17.29756566	4.470367503	4.371857022	2.730924114	9.381198024	13.06579424	35.30952392	15.72206412	54.78998348	37.47866801	43.39607018	438.6490184	52.25106505	54.57668578	21.2191711	39.26988868	47.92263493	40.85766081	36.73692775	0.309214595	3.779099354	0	27.86196614	13.63786489	1.308353282	8.72971375	1.124227094	0.661238751	3.466873684	0.985767551	1.895688816	11.87790142	7.479071349	37.32203596	9.811307415	5.851804851	14.58357654	2.471507991
Erlotinib	342.8457879	280.441267	52.09258903	25.50433034	366.9922905	674.6570879	17.04190928	17.77297771	18.1680842	57.55978291	98.414927	66.15732294	50.95790292	15.15957867	35.70812004	27.2205086	88.98740656	340.3522387	88.56983938	183.3433179	217.9768078	176.8136816	2657.083597	303.3705104	317.2883027	125.28348	196.7341147	295.7985162	183.9396982	118.0189374	3.478235227	12.78616356	5.293367362	104.3973735	49.6886983	12.14422845	86.16655067	8.684240384	4.921416286	20.07421698	6.50116871	9.972777944	32.6512397	13.40886182	148.052591	35.58369956	11.26559045	62.95314856	17.22825534
Estramustine	48.72220977	55.00218267	9.860997957	2.248577052	65.57369428	114.1591695	7.229818942	2.909707927	2.759266987	22.55424376	28.20945909	27.29124152	5.103636935	2.453205214	3.953570694	4.589608368	13.21595445	49.9467326	11.12566447	61.53520785	47.55597496	50.17682373	433.5615765	69.48152766	56.85102085	36.79420861	49.35170057	57.22178735	45.28571087	20.36972324	0.808813647	1.660114332	0.295508274	45.86042614	20.98588777	4.210252673	13.3036464	0.936855912	0.809596016	1.818881744	1.085617223	2.300766924	15.11250734	4.176178856	49.05073097	14.57804762	2.234079015	24.44779382	3.110500585
Everolimus	152.5884135	153.1538352	27.53796949	9.566708923	175.1394093	321.1323672	9.880624592	13.23077426	9.943953452	33.6923027	42.18270192	43.87864357	16.1904336	11.81871212	14.24052754	21.90435178	30.4073474	159.2824509	38.99584834	109.9786008	109.4827549	80.79170577	1227.934868	156.5362569	170.9541724	52.82521129	88.53944113	138.9210238	97.60339714	85.44867734	2.405942396	8.874725851	2.847486894	62.12681392	29.66862797	5.08154748	29.67214991	5.576600267	1.755620257	8.251242562	9.067350152	7.289534314	20.35232546	10.5582706	93.23393926	21.90171638	8.67051141	36.31757644	15.03401245
Exemestane	1.559818238	0.264131009	0.227531286	0	2.731913787	15.8750863	0	2.673796791	1.075757576	0.630119723	0	0	0	0	0	0	0.291120815	2.668192948	2.611873375	1.064962726	3.177796554	0.916664417	47.18013686	0.957854406	2.514108311	2.281746032	1.613846904	0.868395303	0.673400673	1.07022607	0.309214595	0	0	0	0.625390869	0	0	0	0	0	0	0	0.227531286	0	1.984126984	0	0	0	0
Flavopiridol_(Alvociclib)	98.1459171	83.87581355	16.41786352	8.74614977	101.913089	207.4639665	7.790920833	5.064253482	5.164780504	30.86936962	34.14081513	28.65771252	13.16111987	3.639753451	8.49392466	7.514732884	28.0605683	91.40276173	21.84062301	72.86566263	72.75180337	65.56358293	811.6625338	91.34360583	101.7543297	41.09624044	66.7677647	89.786705	63.87628685	37.32119682	0.962265021	4.019383232	1.719832851	47.60802344	22.49809245	3.842051264	23.11265519	2.335635355	1.848860937	4.834551628	1.872326151	3.24775549	15.5265137	2.886703936	60.12016649	15.41378516	2.688896654	27.63466384	4.452136983
Foretinib	67.56377356	52.10420022	10.79108059	5.024135345	70.85408717	128.0523991	2.942350363	3.45719581	3.550173173	9.993485363	16.9641042	12.20718783	8.869490688	2.742411926	6.653380055	6.909903926	16.39467302	63.75929958	15.77635816	35.63859672	41.2146741	32.65983779	488.0460942	56.99369409	57.61978425	21.12636911	35.58631261	55.00403688	35.76022916	23.47937782	0.670177831	2.092243876	1.190653512	18.20833004	8.667680873	2.927257198	14.7757104	1.422515989	1.057163786	4.160491396	1.166920195	1.755264174	5.902506152	2.515053164	27.69951836	6.343261346	2.742643849	11.31538064	4.665324164
Fulvestrant	64.53572692	70.389286	14.43078549	2.831137546	86.0213404	145.1830687	8.761360336	4.025808503	4.028744059	27.58126141	33.82010133	33.4652538	7.207747705	3.557975463	4.254924465	6.37582173	17.63673483	65.43512757	12.40149591	77.09077078	58.74716257	60.70716165	565.374997	86.95087542	73.05617951	47.12539182	62.92184168	75.31268471	58.26010407	25.66524125	1.213220471	2.490171497	0.443262411	55.24874671	25.22872742	5.980033604	14.01624946	1.405283867	1.214394023	2.258839048	1.628425835	3.451150386	18.50202486	6.130184079	61.22759473	17.70033528	3.028275624	29.37990247	4.353932979
Ganetespib_(STA-9090)	128.1163483	174.7882614	25.30155493	10.86052089	122.8530679	334.2977717	29.25685449	10.28490059	7.318105993	78.50979721	85.38412118	104.5867043	13.10954637	9.734842742	20.60379841	35.07026094	49.65608987	111.9819756	24.31333721	233.7663562	170.004536	140.3773445	1244.67168	169.6474664	197.4033757	90.08444852	132.8689342	156.1099883	155.7506419	91.35678944	0	6.982415729	2.659574468	166.5584329	76.86012207	9.884605755	48.41099528	1.290988897	3.603730921	6.395612369	6.067164199	7.1834927	52.18322361	4.890689364	196.8684891	52.76214059	6.179414393	91.35502376	11.80300975
Gefitinib	684.9475282	560.8825339	104.1851781	51.00866068	732.0246149	1345.371472	34.08381856	35.54595543	36.3361684	115.1195658	196.829854	132.3146459	101.9158058	30.31915735	71.41624007	54.05008527	177.9748131	678.8488217	176.5144547	364.0356662	433.9669517	350.8394598	5298.183109	602.4631441	633.2298807	249.9477273	392.7435916	591.5970323	365.0493574	234.5970207	6.956470454	25.57232711	10.58673472	208.7947469	99.37739659	24.2884569	172.3331013	17.36848077	9.842832571	40.14843396	13.00233742	19.94555589	65.30247941	24.71080224	296.1051821	71.16739913	22.53118091	125.9062971	34.45651068
Goserelin	7.925212945	14.76031312	3.409676448	0.118287201	19.61395184	33.21441814	0.416666667	2.012840851	1.643472245	1.774988213	0.440917108	0	2.040217726	2.37439509	0.965655922	0.875787469	1.349251966	16.04356686	1.924846256	5.293881317	6.002087475	8.705708376	172.6241118	13.90834075	6.721977214	2.060639434	13.16664712	13.99956848	5.559000896	5.549384913	0.892270907	0.174155347	0	0	1.383203542	3.518157649	1.733387264	0.84317032	0	0.352360817	0.112233446	1.072961373	2.137511601	0.732312468	0.823414961	0	0.249500998	0	1.147163678
Homoharringtonine_(Omacetaxine_mepesuccinate)	31.03749839	2.252126699	8.858639875	1.792114695	1.845047742	70.48069457	0	0	0	0.809061489	0	0	0	0	0	1.291989664	0	2.091489263	0	20.08032129	51.61098638	0.573363185	367.3270909	15.67787658	40.33376966	0.496031746	3.104711148	6.405740466	0	28.1810047	0.091100193	0	0	0	0	0	0	0	0	0	0	0	0	0	0	0	0.091100193	0	0
Ibritumomab_tiuxetan	13.32137455	11.04068785	0.178903678	0.255232261	19.69086266	17.65186765	1.041684038	0.412541254	1.76176124	3.125052115	3.908387455	3.645894134	0.787353848	0.412541254	0.412541254	1.87090739	0	9.639623006	0.743818611	11.20962449	11.52454367	6.888884651	69.33064924	10.6675124	10.21795468	3.441118766	8.71768323	8.503676093	5.97360638	2.543715733	0	0.196540881	0	6.770946249	3.125052115	0.335345406	1.652184649	0.281056773	0	0	0	0	2.083368076	0	8.079692271	2.527812521	1.252415025	3.645894134	1.87090739
Ibrutinib	285.0236317	239.8328202	28.6028985	16.63604495	334.7684492	468.4332876	10.61995326	18.97048102	13.12467589	28.70227822	82.36734364	34.9051399	18.83080948	9.169710063	25.72698382	20.13376413	54.42791544	249.0611282	56.22229173	160.2606559	157.1305053	219.1256224	2286.319088	223.5626754	222.9121888	67.98103329	164.2648478	199.8635194	115.1445081	97.39337757	0.87735737	8.262396717	3.546099291	55.4719685	25.00041692	10.19559194	68.47034661	4.565115217	1.127657723	19.63488415	3.289482536	5.360835652	18.23393368	30.19707446	85.45284677	20.70586718	12.96593392	31.94493292	16.34537287
Idelalisib	307.8547308	232.9043749	40.15940791	17.90115314	317.614348	595.9340917	13.01015966	18.37638256	18.26915718	40.43263841	67.3256218	46.32918285	29.06050993	13.4957587	26.49053033	57.97669357	50.72860468	311.163158	62.27291288	162.4249304	175.3908598	145.5685712	2091.08849	252.4904727	238.7579787	77.19251735	173.6795661	217.6279986	148.6116717	129.8468547	3.71581087	8.876022402	5.74952056	73.14504287	35.22859071	6.563281194	55.59128774	8.704445682	3.367650559	15.69644614	5.171600477	8.943290799	24.83127444	15.64073481	121.7363002	25.70390685	9.895295016	45.60119887	49.45644653
Imatinib	85.01791491	87.51194045	13.52613606	5.916652298	92.69222222	177.5602851	8.527939553	4.771564458	4.594510136	27.68909724	34.5666778	32.9891219	8.584245238	3.763751907	7.609642482	7.606167535	34.30868926	88.53425331	18.69756793	80.326627	74.30067168	63.09230526	688.9561144	85.12941724	85.6173162	40.60426806	62.46732862	90.48758445	60.27630446	30.20593542	0.796832656	3.640364565	1.321456037	53.26558442	24.98929799	3.424369923	23.83073142	2.915829736	1.983616367	4.356467597	1.567294648	2.244671232	17.05081711	2.85456105	60.22115375	17.63021808	3.11347259	30.15904398	6.309249963
Inotuzumab_ozogamicin	15.24405512	9.102743386	1.524017273	0.510464523	18.34199926	22.58744373	0	1.389318337	0.220312844	0	1.566670681	0.674210342	2.724454239	0	0.666666667	1.247271593	0.200320513	10.89364166	0.736322804	5.144588772	9.962895556	7.765966143	128.5881708	9.282053632	7.380428143	1.311466357	9.233967261	6.850596671	4.310715793	4.110242163	0	1.572327044	0	0	0	0.670690812	1.221001221	0	0	0	0	0	0	0	3.858632828	1.777777778	4.381442764	0	2.648420536
Ipilimumab	7.960465399	9.645758654	0.762008637	0	11.18815371	11.06337389	0	0	0	0	0.925925926	0	0.249875062	0	0	1.87090739	0.818277206	7.779440934	0.969377724	4.052172243	2.56351817	0.624219725	51.90752794	7.520049317	5.4456339	0.341646737	2.492218356	1.303242627	2.9190086	3.290408494	0	0	0	0	0	0	0.881834215	0	0	0	0	0	0	0	1.527225768	0	0	0	1.87090739
Ixabepilone	0.405923395	0.519180625	0	0.397332186	1.316397931	3.191718777	0	0	0.063185954	0.193837652	0.03088375	0	0.080651645	0	0.127720178	0.145024751	0.157612505	1.62626983	0.035077359	0.372783508	0.923211865	0.459358987	11.97506245	0.779598112	0.615823623	0.296729698	0.224595233	0.71410966	0.595565632	1.004708244	0.030921459	0	0.177304965	0	0	0	0	0	0.082056181	0	0.153517386	0.480413895	0	0	0.649976122	0	0.018875869	0	0.03118179
Ixazomib_(MLN9708)	36.21567463	41.63689633	6.52321606	2.825595371	74.13478087	180.9369616	3.852090881	6.795561933	5.747890235	28.21909944	15.81500413	15.80788196	5.118467484	5.183905623	10.00024659	3.136579138	8.89805946	35.6191651	14.23706854	36.00605399	34.51895083	36.44376574	730.016275	43.73183365	74.70769972	19.80119763	73.1639463	44.89983978	34.17948094	31.55964968	0.508174853	40.50289393	0.295508274	23.95815438	10.41684038	1.477528012	12.42468445	0.187371182	0.595311627	2.368151712	1.54125167	1.121943822	9.123209492	1.561983697	25.94387366	8.585167794	2.327165481	12.15298045	1.039392994
Lapatinib	344.7221849	281.5556323	56.01181882	26.04545588	373.2890807	685.8503921	17.04190928	17.8948992	18.1680842	57.55978291	98.414927	66.15732294	51.08284045	15.15957867	35.70812004	28.88651238	93.07729966	347.7135966	97.15068962	182.0178331	220.2539044	176.7369198	2682.712304	302.7390887	321.467291	125.8291674	198.7440902	296.0690144	185.3122468	120.1902953	4.019947036	12.78616356	5.293367362	104.3973735	49.6886983	13.99141569	86.96783272	8.684240384	4.921416286	20.07421698	6.631887664	9.972777944	32.6512397	12.35540112	149.2120184	35.58369956	11.26559045	63.9165397	18.47552693
Lenalidomide	148.6294947	149.1683473	19.78672697	10.32265389	191.8473176	261.419306	8.042218925	11.68350855	7.144385199	20.02492419	55.78313004	26.11525867	8.801727659	5.368646416	11.98935683	9.465854315	35.54052636	143.4208461	43.21047458	107.4479019	91.33953091	128.0390967	1429.455413	138.5062305	148.6388234	41.75428251	109.1214375	141.2343028	71.19277831	56.42729806	1.009243715	3.696145125	2.659574468	41.35801711	18.75031269	6.439870938	35.67108125	1.443511896	0.171732784	11.8468328	2.513423389	1.999262936	13.77247309	28.75900284	52.78650192	15.45587868	10.56720935	24.22764587	8.23810751
Lenvatinib	67.30314711	56.16896035	9.625667512	5.824392706	69.98279392	135.9033832	3.533385331	3.634210307	3.464164005	11.80827006	21.09801417	14.17423194	6.581000285	3.055128362	9.012652746	6.484939454	18.17478234	65.23476651	15.99591219	39.70629136	44.50935838	35.91615324	532.1166019	59.90043088	62.60221857	24.78553126	41.35933309	60.65868228	37.6518483	25.75092174	0.590109174	3.092910174	0.878193626	22.1398439	10.56275008	3.368927829	17.53588569	1.624425367	1.017378557	4.654560448	1.43856488	1.921812022	7.146137463	2.642716295	30.104236	7.750649582	2.870357523	13.61409411	4.256377603
Letrozole	1.559818238	0.264131009	0.227531286	0	2.731913787	15.8750863	0	2.673796791	1.075757576	0.630119723	0	0	0	0	0	0	0.291120815	2.668192948	2.611873375	1.064962726	3.177796554	0.916664417	47.18013686	0.957854406	2.514108311	2.281746032	1.613846904	0.868395303	0.673400673	1.07022607	0.309214595	0	0	0	0.625390869	0	0	0	0	0	0	0	0.227531286	0	1.984126984	0	0	0	0
Leuprolide	12.04515336	19.74350877	4.030053529	0	31.71639595	44.73507157	0	2.83492524	2.00884331	2.531707278	0.881834215	0	2.789354788	3.405722933	1.931311843	1.751574937	1.583692752	22.18242437	1.037299631	8.193474722	6.293439659	10.59111816	225.9652835	22.37868007	9.407651735	1.372887865	18.9989638	15.48417741	7.793119577	8.340168928	1.166112624	0.348310693	0	0	2.766407084	3.759703542	2.584940312	1.124227094	0	0.704721635	0.224466891	1.430615165	4.275023202	1.464624936	1.397328923	0	0.249500998	0	2.294327355
Lomustine	4.8870437	7.536346839	0	0	4.141291642	18.7658286	2.083368076	0	1.984126984	7.325624286	6.851788947	7.68772879	0	0	0	0	0	1.136634031	0.122279286	15.71179267	8.598511719	10.90065232	58.96375877	8.46157543	9.220773739	6.250104229	10.88874386	7.746540428	7.774159517	2.786487683	0	1.54012654	0	13.5418925	6.250104229	0	2.083368076	0	0.985105789	0	0	0	4.166736153	0.813734246	12.03582745	4.166736153	0	7.291788268	0
Masitinib	54.73418445	48.48358594	7.742385587	3.563973971	59.47047695	106.7584684	3.918886482	3.310613224	2.984056525	13.24362758	16.0512827	15.93066582	5.79379359	2.19917493	4.049289341	5.85023562	14.79582735	54.32398477	10.83466741	42.02620718	39.31451642	32.83184257	397.3742865	49.46646174	47.44309082	19.73324942	32.90386447	47.85578645	34.70347028	20.59573225	0.737541215	3.36341278	1.174977602	24.42709435	11.67322152	1.95423678	11.35853405	1.275468746	0.676579053	2.407343868	1.050882491	1.535094753	7.760290608	1.927228	31.75497068	8.028338592	2.099971502	13.91369298	4.44324098
Medroxyprogesterone_acetate_(MPA)	43.79710148	47.34590929	10.84374688	1.887425031	61.08637099	101.7093756	5.840906891	2.683872335	2.685829373	18.75911667	22.54673422	22.3101692	4.805165137	2.453205214	2.83661631	4.380858463	11.85486349	45.28013351	8.267663937	52.06863305	39.9131519	42.33517724	389.5073892	58.51630124	49.64447262	31.76629939	41.94789446	50.8597456	39.36939336	18.04192547	0.911885179	1.660114332	0.295508274	36.83249781	16.81915161	3.986689069	9.344166307	0.936855912	0.809596016	1.505892699	1.085617223	2.300766924	12.33468324	4.086789386	42.60981308	11.80022352	2.018850416	19.58660164	2.902621986
Megestrol	4.307726718	1.259155885	3.897200955	0	20.61081342	25.82584405	0	0	0	1.114827202	0	0.177861796	0	0.243664717	0	1.172795783	0.491441328	10.52578829	1.662839126	6.022051936	7.947300429	13.92677309	90.11721339	15.49544347	6.356013059	5.071197936	1.796398678	1.953867389	7.248050016	5.677002001	0.309214595	0	0	0	0	0	0	0	0	0	0	0	0.227531286	3.571546328	5.374249769	0	0	0	0
Methyltestosterone	42.27741055	44.62014291	16.2868338	1.083456063	55.13481714	113.860254	4.166736153	3.870797702	1.773925183	16.13647249	16.63046735	17.29756566	4.470367503	4.371857022	2.730924114	9.381198024	13.06579424	35.30952392	15.72206412	54.78998348	37.47866801	43.39607018	438.6490184	52.25106505	54.57668578	21.2191711	39.26988868	47.92263493	40.85766081	36.73692775	0.309214595	3.779099354	0	27.86196614	13.63786489	1.308353282	8.72971375	1.124227094	0.661238751	3.466873684	0.985767551	1.895688816	11.87790142	7.479071349	37.32203596	9.811307415	5.851804851	14.58357654	2.471507991
Midostaurin	247.5650654	269.0750762	38.52093402	17.60323076	303.0892597	601.1027724	19.34768425	20.4711816	15.22249264	65.98910484	106.4053626	80.84694457	23.72303994	16.6490136	32.27956732	15.70769729	85.31749261	253.4008069	80.29670861	205.7952824	206.4778255	194.2087495	2517.444498	251.0008628	292.3834789	123.9992822	229.6894942	297.1970307	168.5926898	100.9370443	3.5163713	21.62320109	1.689737674	125.2147376	57.05415092	26.71229197	81.25824581	7.780519253	2.486380966	21.73819442	4.826412596	10.17245797	39.80363414	15.48476859	152.8031426	45.7373394	19.59432425	70.85687415	10.13471461
Mogamulizumab	93.18127093	99.37534385	13.6513337	3.5409321	118.7856314	207.0418297	6.847475795	6.724731148	6.033789777	20.35707691	29.27345508	25.35817421	10.21263993	4.128192305	6.225136841	4.671953971	20.69839007	100.2102628	21.27036946	90.27890334	65.77980009	78.28622114	858.456382	91.9863427	74.17004631	39.82742877	62.66175734	110.4122848	52.49426871	37.53494473	1.475327219	3.378684807	0	40.90602512	21.03341771	6.239187597	22.33980652	2.810567735	0	14.48809272	0.724329642	1.895688816	15.77801308	19.05904017	62.37042906	13.97804357	14.72187007	22.30086359	3.095143787
Moxetumomab_pasudotox	15.24405512	9.102743386	1.524017273	0.510464523	18.34199926	22.58744373	0	1.389318337	0.220312844	0	1.566670681	0.674210342	2.724454239	0	0.666666667	1.247271593	0.200320513	10.89364166	0.736322804	5.144588772	9.962895556	7.765966143	128.5881708	9.282053632	7.380428143	1.311466357	9.233967261	6.850596671	4.310715793	4.110242163	0	1.572327044	0	0	0	0.670690812	1.221001221	0	0	0	0	0	0	0	3.858632828	1.777777778	4.381442764	0	2.648420536
Necitumumab	684.9475282	560.8825339	104.1851781	51.00866068	732.0246149	1345.371472	34.08381856	35.54595543	36.3361684	115.1195658	196.829854	132.3146459	101.9158058	30.31915735	71.41624007	54.05008527	177.9748131	678.8488217	176.5144547	364.0356662	433.9669517	350.8394598	5298.183109	602.4631441	633.2298807	249.9477273	392.7435916	591.5970323	365.0493574	234.5970207	6.956470454	25.57232711	10.58673472	208.7947469	99.37739659	24.2884569	172.3331013	17.36848077	9.842832571	40.14843396	13.00233742	19.94555589	65.30247941	24.71080224	296.1051821	71.16739913	22.53118091	125.9062971	34.45651068
Nilotinib	245.1593018	295.6449571	51.85999977	22.44137053	289.3787184	635.1284838	36.22141133	14.5644659	14.17400569	119.2605954	149.4215086	142.9914029	26.01148297	12.74907206	29.93828259	16.29649361	153.1221573	299.7707333	72.2150026	319.3719989	269.7818459	241.0663959	2489.449119	306.0538892	338.9298256	169.2401827	247.4148962	342.1564876	211.82025	93.96762758	2.794907611	15.63533501	3.061180894	232.1928432	108.9364833	10.96773202	96.99748472	6.824294138	5.548176183	17.03452506	4.985346649	7.89466121	73.05699323	10.31737614	243.5735924	75.56481742	12.73115774	129.1459697	11.30371527
Nilutamide	42.27741055	44.62014291	16.2868338	1.083456063	55.13481714	113.860254	4.166736153	3.870797702	1.773925183	16.13647249	16.63046735	17.29756566	4.470367503	4.371857022	2.730924114	9.381198024	13.06579424	35.30952392	15.72206412	54.78998348	37.47866801	43.39607018	438.6490184	52.25106505	54.57668578	21.2191711	39.26988868	47.92263493	40.85766081	36.73692775	0.309214595	3.779099354	0	27.86196614	13.63786489	1.308353282	8.72971375	1.124227094	0.661238751	3.466873684	0.985767551	1.895688816	11.87790142	7.479071349	37.32203596	9.811307415	5.851804851	14.58357654	2.471507991
Nimotuzumab	684.9475282	560.8825339	104.1851781	51.00866068	732.0246149	1345.371472	34.08381856	35.54595543	36.3361684	115.1195658	196.829854	132.3146459	101.9158058	30.31915735	71.41624007	54.05008527	177.9748131	678.8488217	176.5144547	364.0356662	433.9669517	350.8394598	5298.183109	602.4631441	633.2298807	249.9477273	392.7435916	591.5970323	365.0493574	234.5970207	6.956470454	25.57232711	10.58673472	208.7947469	99.37739659	24.2884569	172.3331013	17.36848077	9.842832571	40.14843396	13.00233742	19.94555589	65.30247941	24.71080224	296.1051821	71.16739913	22.53118091	125.9062971	34.45651068
Nintedanib_(BIBF_1120)	87.28247799	70.47644589	11.09192598	6.453455737	94.34456853	163.269867	3.510777728	5.229460128	5.138240089	11.8260284	18.669881	14.81644789	9.036111821	4.097175933	8.71630994	9.727160077	16.36773437	82.43874182	18.29891229	47.81832613	52.55803996	40.98012662	631.7500092	68.94155651	70.25547292	23.53305718	45.79206539	66.31245161	49.92640241	34.08888317	1.117523239	6.035803251	1.766641032	20.4061219	9.655036149	3.606443996	17.21291743	2.330545565	0.994302307	4.954222184	1.834648948	2.261629217	6.852432209	3.55258542	34.02119718	7.302655056	3.452441457	12.43719422	7.401205476
Niraparib	12.36277567	14.30950447	3.356126672	1.218098761	18.33267406	43.19120545	2.382053859	0	2.75829403	6.936651038	9.18833897	7.598797892	1.383123527	0.243664717	1.750368969	0.741792849	6.578082922	15.56357066	8.325116519	15.66121872	17.11371754	12.76698285	182.0555585	16.55410626	25.85287054	10.74571513	18.99361514	20.70074407	13.22692041	6.044184482	0.154607297	0.77006327	0	13.5418925	6.250104229	0	6.646345673	1.93122179	0.492552894	0.938967136	0.296805344	0	4.166736153	0.921270415	14.11480452	4.166736153	0	8.467928799	0.623635797
Nivolumab_(BMS-936558)	7.960465399	7.101035138	0.762008637	0	10.01661109	7.312296015	0	0	0	0	0.925925926	0	0.249875062	0	0	0.623635797	1.660551346	6.532169341	0.969377724	2.770083102	3.780063182	0.624219725	36.95355262	7.520049317	3.67736439	0.341646737	1.244946763	1.303242627	2.9190086	2.216066998	0	0	0	0	0	0	0.881834215	0	0	0	0	0	0	0	1.527225768	0	0	0	0.623635797
Obinutuzumab	1.280489868	1.825559069	0	0.510464523	3.927196908	2.516905788	0	0	0	0	1.566670681	0	0	0	0	0	0	1.6553454	0	2.37450567	7.480208741	3.123493457	34.37061268	0	3.597411107	0.290486565	3.092473858	2.234604568	1.183167847	0	0	0.393081761	0	0	0	0.670690812	1.221001221	0	0	0	0	0	0	0	0.403551251	0.888888889	2.50483005	0	0
Ofatumumab	1.280489868	1.825559069	0	0.510464523	3.927196908	2.516905788	0	0	0	0	1.566670681	0	0	0	0	0	0	1.6553454	0	2.37450567	7.480208741	3.123493457	34.37061268	0	3.597411107	0.290486565	3.092473858	2.234604568	1.183167847	0	0	0.393081761	0	0	0	0.670690812	1.221001221	0	0	0	0	0	0	0	0.403551251	0.888888889	2.50483005	0	0
Olaparib	12.36277567	14.30950447	3.356126672	1.218098761	19.01817716	46.29290056	2.382053859	0	2.75829403	7.377568145	9.18833897	7.598797892	1.383123527	0.243664717	1.750368969	0.741792849	6.578082922	15.56357066	8.325116519	15.66121872	17.43300235	12.76698285	193.5772564	16.79706058	26.56363622	10.74571513	20.37411855	20.70074407	13.22692041	7.518932956	0.154607297	1.54012654	0	13.5418925	6.250104229	0	6.646345673	1.93122179	0.492552894	0.938967136	0.296805344	0	4.166736153	0.921270415	14.11480452	4.166736153	0	8.467928799	0.623635797
Olaratumab	460.7130828	444.7092829	80.88598391	40.52746809	532.356591	1076.990349	33.25048523	30.14277077	28.15144488	110.6394005	181.2562734	128.1101304	51.69776503	25.55378787	62.70706447	33.51135029	143.9456172	499.676191	139.1625418	322.7636403	359.3048265	296.2747098	4300.934602	454.5563574	517.4877241	219.8865558	354.1486875	528.7359447	291.8514562	184.8749167	4.506391603	23.26924786	5.235836965	207.4787799	99.37739659	27.98283138	150.6922275	12.56053681	4.079195736	35.83894461	11.17937518	15.55275862	65.93259913	21.52005402	256.5133223	70.77281637	19.8521523	122.9203025	23.85470213
Osimertinib	684.9475282	560.8825339	104.1851781	51.00866068	732.0246149	1345.371472	34.08381856	35.54595543	36.3361684	115.1195658	196.829854	132.3146459	101.9158058	30.31915735	71.41624007	54.05008527	177.9748131	678.8488217	176.5144547	364.0356662	433.9669517	350.8394598	5298.183109	602.4631441	633.2298807	249.9477273	392.7435916	591.5970323	365.0493574	234.5970207	6.956470454	25.57232711	10.58673472	208.7947469	99.37739659	24.2884569	172.3331013	17.36848077	9.842832571	40.14843396	13.00233742	19.94555589	65.30247941	24.71080224	296.1051821	71.16739913	22.53118091	125.9062971	34.45651068
Paclitaxel	19.98708726	19.62432435	2.67284197	1.374612593	23.47932203	40.63889558	1.524131314	1.077218831	0.843578919	4.778732527	7.594166563	5.401079892	1.674861657	0.693267563	1.936260874	1.749284681	5.09441276	20.16549624	4.913584251	15.58626366	15.2117497	14.90332765	174.2716108	19.63550823	19.58851308	8.009234781	14.10083277	18.84951638	11.71423192	8.591021595	0.260190476	0.664724633	0.25856974	9.115172663	4.336812245	1.360774202	5.515900186	0.374569681	0.236227504	1.188691187	0.368084766	0.936383842	2.840315598	1.387496644	12.35051488	2.982937776	0.776028315	5.196495306	1.246311794
Palbociclib	57.93826631	64.73722343	12.18928586	3.416872058	62.32934818	121.6826673	8.512875875	3.662599932	5.810614778	34.30731959	26.89372864	27.87542593	10.51004724	3.281107728	6.646994247	4.45912864	46.50130683	53.17759851	6.99443787	62.29784491	52.17023799	45.40573581	475.5011603	76.95356197	55.74675799	31.79489687	44.27506142	63.16980496	42.20637041	22.81274355	0	3.084737215	0.443262411	47.96300082	21.97632798	1.542515097	12.78016024	0.281056773	1.799126019	2.921739738	1.04011428	2.133756828	16.08340329	0.554537253	52.67832582	14.78086792	0.456927104	27.6607906	2.182725288
Panitumumab	684.9475282	560.8825339	104.1851781	51.00866068	732.0246149	1345.371472	34.08381856	35.54595543	36.3361684	115.1195658	196.829854	132.3146459	101.9158058	30.31915735	71.41624007	54.05008527	177.9748131	678.8488217	176.5144547	364.0356662	433.9669517	350.8394598	5298.183109	602.4631441	633.2298807	249.9477273	392.7435916	591.5970323	365.0493574	234.5970207	6.956470454	25.57232711	10.58673472	208.7947469	99.37739659	24.2884569	172.3331013	17.36848077	9.842832571	40.14843396	13.00233742	19.94555589	65.30247941	24.71080224	296.1051821	71.16739913	22.53118091	125.9062971	34.45651068
Panobinostat	13.18323456	20.17710325	6.687206566	0.915634788	16.2362745	46.15328854	4.976590584	0.455886929	0.822287501	15.52022552	15.38798619	18.08417185	1.362611706	0.269325178	0.699756498	1.330607763	12.67497996	12.36735054	3.238795165	37.11020178	23.68705587	27.56193912	155.3123728	24.14949809	24.30326816	16.37977495	21.89440121	28.9536355	20.44479512	7.243500086	0.308322405	0.394820761	0.080593166	29.81846906	14.30384483	1.49892227	5.700269749	0.406595342	0.764925624	0.336700662	0.408821987	0.52973528	10.82595141	0.06499963	28.09322121	9.171868778	0.194031288	16.09801857	0.300585883
Pazopanib	106.7437001	92.83095392	16.06838064	8.408532248	113.971202	224.8766059	5.888975551	6.456016005	6.204159339	19.81839708	33.62725864	23.80069178	11.67918415	5.423200285	13.05995024	10.60035382	27.69181724	106.2410204	25.86160537	65.25946373	75.42500068	60.13435789	879.2403937	95.92182541	103.3759173	40.99575805	68.63346322	101.7161684	62.72534456	40.79428973	1.035051056	4.149348524	1.463656043	36.89973983	17.60458347	6.230608794	29.78751491	2.707375612	1.39582065	7.86070067	2.323435163	3.10640168	12.0943073	4.16619518	50.39798901	12.9177493	4.652956236	22.8746107	6.886084073
Pembrolizumab	7.960465399	7.101035138	0.762008637	0	10.01661109	7.312296015	0	0	0	0	0.925925926	0	0.249875062	0	0	0.623635797	1.660551346	6.532169341	0.969377724	2.770083102	3.780063182	0.624219725	36.95355262	7.520049317	3.67736439	0.341646737	1.244946763	1.303242627	2.9190086	2.216066998	0	0	0	0	0	0	0.881834215	0	0	0	0	0	0	0	1.527225768	0	0	0	0.623635797
Perifosine	304.0608627	250.8388226	42.06256087	16.2430091	303.8810807	596.3743077	16.41150681	18.26864795	17.10205998	56.02647885	73.61784761	66.65653533	29.65326211	13.95586242	25.73361938	45.59749074	46.2319536	288.8568154	56.41253067	189.020484	187.3906191	146.2235874	2112.635864	264.3099357	291.0397809	89.44677672	165.9713717	237.4959682	163.4126806	128.8563932	3.731922552	13.74838421	4.863990279	101.253072	48.78440741	7.655862049	53.40955372	6.878926528	2.803214846	13.85246441	8.305303656	9.703530408	32.56347073	11.50070293	160.2542127	35.2426504	10.9243811	60.76788768	36.29989601
Pertuzumab	347.6956901	317.8213926	63.06025378	23.49086979	396.90026	747.6340577	21.82270835	24.1105841	18.97503403	75.61361272	115.4236248	89.87088212	41.17542539	20.00803851	35.01853636	29.50090621	115.4197693	341.2450281	125.6870486	225.837968	243.6125278	217.6603792	2903.323124	319.2639956	351.5677573	136.9688561	249.4063689	342.5044492	211.5886569	132.7719733	3.20509478	21.23011933	6.15411061	139.0369778	63.5606654	24.02952872	91.54527066	8.3426328	3.57433503	23.00286952	6.93227325	11.67462393	43.9703703	15.12745036	182.9547645	48.715244	18.37433401	80.35243993	18.86561576
Pomalidomide	144.5079105	151.172956	23.15589424	8.071692897	208.6949841	333.9400868	13.9461503	9.555686104	8.643310234	38.51596481	60.98777385	47.84791945	12.60220984	6.333836231	13.19278322	12.65362424	36.10674072	149.7918527	51.73829165	137.7269817	117.9723509	109.4826652	1461.033568	163.5403641	158.6219645	66.66966098	130.9876642	152.5512343	94.53276204	55.41989783	1.420446688	6.25835136	1.559355645	75.89351053	35.91824892	8.610770391	40.03092395	5.056949719	0.764036135	7.889433319	4.712296671	4.673401603	26.82115501	7.874222796	98.71824858	26.68658903	9.108382498	42.76940685	9.096082422
Ponatinib	73.20623404	126.0935538	21.51548565	5.700899364	81.91156093	231.0996237	25.2991027	4.517994329	4.300319874	82.76728634	81.38283654	99.43999357	9.841942295	3.644836555	7.448581096	6.052288895	97.04040854	104.9786927	11.06340947	198.7066267	134.0589868	132.020701	758.7881361	134.9153787	127.9344376	88.59120069	104.502348	151.5709503	106.3526904	26.41312105	0.825783197	5.052255113	1.329787234	162.728706	76.14280326	0.800154902	33.85055071	4.083028673	7.474356344	3.809411111	1.393352148	3.476487875	50.82259391	1.246976361	153.0497526	50.64256966	0.636352091	88.26757014	4.053632679
Ramucirumab_(Cyramza)	467.0955755	401.5338128	73.7489974	44.31329895	520.5097016	1078.357974	19.76124918	28.63508348	28.30613714	70.5834177	143.1932603	86.68798905	44.81420229	23.59582709	61.29725439	43.77062168	127.4847271	500.3987288	139.0468029	279.4591337	335.1065252	267.7631819	4334.761781	417.1852351	497.0686586	181.6644741	320.2277953	447.3772624	272.7991253	185.8926899	3.393964157	18.73610367	7.092198582	125.521631	61.07355837	18.44948795	155.4090899	13.02884964	3.547602352	40.39222802	8.889544455	14.96083789	40.86088898	21.25317798	192.34897	45.36376936	21.36420936	80.29314232	24.29876088
Regorafenib	83.8257128	72.15637001	11.01511325	4.900161241	85.90430234	160.8987418	6.325492649	3.737784955	3.909762401	20.34515348	25.50783865	24.00796013	7.611331122	2.508544481	5.863285538	8.532220288	21.21978151	79.87952062	13.67457079	74.24133991	58.94664697	51.44063353	577.9461493	80.94015664	69.97513785	31.00548854	48.96855772	74.62169221	48.69274844	27.63223783	1.176541334	3.647383259	1.29881227	38.78797828	18.24688507	3.491336705	16.5392036	1.798350136	1.443761712	4.080057617	1.314661331	2.675181653	12.37403201	3.577794734	52.63333003	12.79040402	2.9734303	22.31477825	6.029299973
Ribociclib	57.93826631	64.73722343	12.18928586	3.416872058	62.32934818	121.6826673	8.512875875	3.662599932	5.810614778	34.30731959	26.89372864	27.87542593	10.51004724	3.281107728	6.646994247	4.45912864	46.50130683	53.17759851	6.99443787	62.29784491	52.17023799	45.40573581	475.5011603	76.95356197	55.74675799	31.79489687	44.27506142	63.16980496	42.20637041	22.81274355	0	3.084737215	0.443262411	47.96300082	21.97632798	1.542515097	12.78016024	0.281056773	1.799126019	2.921739738	1.04011428	2.133756828	16.08340329	0.554537253	52.67832582	14.78086792	0.456927104	27.6607906	2.182725288
Rigosertib	27.0712735	16.32672586	25.87224396	0	41.27834586	117.3068116	2.083368076	0.825082508	2.088801594	20.69588857	7.028920429	7.72794572	4.590967942	1.312411943	3.426166296	5.542948203	35.63668433	41.71323141	1.029633255	31.14585474	35.13751806	29.01256252	470.2285336	31.14193571	43.72680745	10.33160344	21.99194005	25.16506718	27.83931341	31.31825839	1.392638214	6.534871951	0.459136823	13.5418925	6.250104229	0	2.862184276	0	0.827129859	0	0.367107195	1.109079464	4.705787108	0.26816841	33.31484018	4.166736153	0.26816841	7.291788268	0.623635797
Rituximab	1.280489868	1.825559069	0	0.510464523	3.927196908	2.516905788	0	0	0	0	1.566670681	0	0	0	0	0	0	1.6553454	0	2.37450567	7.480208741	3.123493457	34.37061268	0	3.597411107	0.290486565	3.092473858	2.234604568	1.183167847	0	0	0.393081761	0	0	0	0.670690812	1.221001221	0	0	0	0	0	0	0	0.403551251	0.888888889	2.50483005	0	0
Romidepsin	14.50155801	22.19481357	7.355927223	1.007198267	17.85990195	50.76861739	5.474249642	0.501475622	0.904516251	17.07224807	16.92678481	19.89258903	1.498872876	0.296257696	0.769732148	1.463668539	13.94247795	13.60408559	3.562674681	40.82122196	26.05576145	30.31813303	170.8436101	26.5644479	26.73359498	18.01775244	24.08384133	31.84899905	22.48927464	7.967850095	0.339154645	0.434302837	0.088652482	32.80031597	15.73422931	1.648814496	6.270296724	0.447254876	0.841418186	0.370370728	0.449704185	0.582708809	11.90854656	0.071499593	30.90254333	10.08905566	0.213434417	17.70782042	0.330644471
Rucaparib	8.241850445	9.539669644	2.237417781	0.812065841	12.22178271	28.79413697	1.588035906	0	1.838862687	4.624434025	6.125559314	5.065865261	0.922082351	0.162443145	1.166912646	0.494528566	4.385388615	10.37571378	5.550077679	10.44081248	11.40914503	8.511321902	121.3703723	11.03607084	17.23524703	7.163810085	12.6624101	13.80049604	8.817946943	4.029456321	0.103071532	0.513375513	0	9.027928331	4.166736153	0	4.430897115	1.287481193	0.328368596	0.625978091	0.197870229	0	2.777824102	0.614180277	9.409869681	2.777824102	0	5.645285866	0.415757198
Ruxolitinib	174.3630003	118.065872	18.87716917	4.802402683	153.4783308	286.0157661	5.191995748	6.906266735	6.186958811	17.22196792	26.60345694	18.77560376	14.63343273	5.140348428	11.01112491	24.41413123	24.22990512	150.5869866	32.45852675	91.19750932	94.23604278	76.33840045	1091.86924	109.0202875	97.37046935	37.07497175	74.41547485	113.0855035	79.70728839	56.05810091	1.652123804	6.090349547	0.886524823	28.22232343	14.41291643	7.22490862	30.40274845	2.685028755	1.582847525	9.614564877	2.126984615	3.659374005	10.98703129	9.131790112	60.55555287	10.45304324	9.95653143	15.70672026	20.25664579
Selumetinib	505.0236035	363.7298635	52.03792018	23.99774669	521.0637041	822.2177535	19.60466804	23.49012806	24.11832007	67.60127566	98.46810306	71.50799077	47.13648743	14.30253193	33.8841716	49.74349376	67.84872919	462.4422896	71.77602894	242.6997796	252.1221362	206.902633	2999.911702	412.0824871	347.4465075	124.365977	203.1605941	362.997447	218.9915216	150.3149814	6.748500338	18.30469875	7.493805007	118.5915677	56.30883484	12.10923715	73.95319926	11.43849228	4.870463608	22.98948608	7.840821681	13.95973732	37.43889703	17.40240596	228.646532	40.50344335	11.77861259	73.19904161	37.22876195
Siltuximab	431.9485578	410.6681129	73.21218061	32.03484884	530.3661732	979.011332	22.70039332	28.31596191	23.73096706	75.88854654	161.2284479	89.34219457	35.21926222	17.9612698	52.00191229	29.32643157	136.2598037	443.4339637	148.8655151	319.4571365	326.6512942	327.0879244	4537.380695	403.5108768	501.0343531	172.7522775	348.7989463	442.3934917	245.4636108	167.2221855	3.590515819	19.74847284	3.118711291	139.3778827	65.58639361	28.65299083	137.3449731	10.2182819	3.525493694	34.81017276	7.21166023	13.34107033	44.5232368	36.61966814	192.661374	49.93017155	25.95507863	83.10922404	19.9333103
Sonidegib_(LDE225)	0.506677491	6.157534951	0.143184422	0	6.517023441	23.7180963	0	0	0	0.734214391	0	0	0	0	1.877934272	0.623635797	0.725426052	14.38112705	0	0.258799172	3.377485979	2.981724954	60.55291011	0	1.826327998	3.844522852	3.90807526	2.516200295	0.770668042	2.57867001	0.61842919	0	0	0	0	0.483091787	0	0	0	0	2.606873567	1.4781966	0	0	0	0	0	0	0.623635797
Sorafenib	117.2200916	88.31398915	13.53643205	6.461518604	117.3649041	199.8284343	4.843143333	5.625459975	5.701926716	17.00205221	25.70097164	19.20175828	11.57428424	4.133284423	9.178093798	11.67019705	21.13162642	107.6604562	20.10313687	59.67155634	64.15411548	52.21023228	764.1053517	95.61819507	90.16983726	32.693003	55.37485554	93.28776334	57.64862821	37.68833257	1.42181407	4.780388765	1.587413484	30.43318797	14.31281262	4.22971389	20.97633355	2.463978125	1.266744661	6.073698873	1.76460161	3.32375575	9.949815424	5.068302278	51.36256736	10.54098884	4.110877314	18.74124542	7.926969772
Sunitinib	83.85468306	72.59234906	12.56010218	6.395114587	89.95660544	173.128607	4.416731663	5.069884772	4.653119504	14.86379781	25.58422543	17.92913519	9.079463872	4.067400214	9.844097901	8.106174317	20.85065284	82.53569035	19.65164579	51.31489365	58.04126503	46.97062139	680.1048715	75.38464841	78.95772389	30.95439427	52.44880696	78.38899462	47.89129048	31.39912149	0.776288292	3.112011393	1.097742032	27.67480487	13.2034376	4.756792947	22.75245085	2.030531709	1.046865488	6.320719675	1.96621309	2.441808428	9.070730477	3.503434264	38.58469133	9.799423088	4.115924689	17.15595803	5.495615622
Tamoxifen	64.53572692	70.389286	14.43078549	2.831137546	86.0213404	145.1830687	8.761360336	4.025808503	4.028744059	27.58126141	33.82010133	33.4652538	7.207747705	3.557975463	4.254924465	6.37582173	17.63673483	65.43512757	12.40149591	77.09077078	58.74716257	60.70716165	565.374997	86.95087542	73.05617951	47.12539182	62.92184168	75.31268471	58.26010407	25.66524125	1.213220471	2.490171497	0.443262411	55.24874671	25.22872742	5.980033604	14.01624946	1.405283867	1.214394023	2.258839048	1.628425835	3.451150386	18.50202486	6.130184079	61.22759473	17.70033528	3.028275624	29.37990247	4.353932979
Tecemotide_(Emepepimut-S_L-BLP25)	25.05636147	19.1528908	3.955170073	3.000874476	35.77517213	66.00634704	0	2.220609731	2.110301165	0.782674479	3.67642389	1.622885323	2.555905233	1.880550117	2.537335272	2.142125414	8.580889929	25.38117098	13.87851094	11.59373618	21.69856384	8.112042492	254.3755365	21.55814849	30.85391491	4.379525048	15.95127769	22.97051847	13.04693101	11.27642933	0.25892818	0	0.886524823	1.745127369	0	1.166866916	8.118167253	0.319284802	0.171732784	1.11069992	0.41956933	0.999631468	0.859426069	1.803120326	5.880953405	1.008233432	4.038069303	1.926782274	1.247271593
Temozolomide	4.8870437	7.536346839	0	0	4.141291642	18.7658286	2.083368076	0	1.984126984	7.325624286	6.851788947	7.68772879	0	0	0	0	0	1.136634031	0.122279286	15.71179267	8.598511719	10.90065232	58.96375877	8.46157543	9.220773739	6.250104229	10.88874386	7.746540428	7.774159517	2.786487683	0	1.54012654	0	13.5418925	6.250104229	0	2.083368076	0	0.985105789	0	0	0	4.166736153	0.813734246	12.03582745	4.166736153	0	7.291788268	0
Temsirolimus	152.5884135	153.1538352	27.53796949	9.566708923	175.1394093	321.1323672	9.880624592	13.23077426	9.943953452	33.6923027	42.18270192	43.87864357	16.1904336	11.81871212	14.24052754	21.90435178	30.4073474	159.2824509	38.99584834	109.9786008	109.4827549	80.79170577	1227.934868	156.5362569	170.9541724	52.82521129	88.53944113	138.9210238	97.60339714	85.44867734	2.405942396	8.874725851	2.847486894	62.12681392	29.66862797	5.08154748	29.67214991	5.576600267	1.755620257	8.251242562	9.067350152	7.289534314	20.35232546	10.5582706	93.23393926	21.90171638	8.67051141	36.31757644	15.03401245
Thalidomide	250.8055232	236.4448081	47.68409426	17.77463428	315.0985969	549.3726451	19.56567937	13.5745212	13.23960643	58.45057191	93.13392138	67.25942219	22.52203017	9.618039301	24.3942422	22.74122376	56.10774386	254.3135584	63.55288137	209.3321605	189.359541	170.2458588	2215.004482	253.5569081	246.9645328	105.5858335	182.7152636	234.8404835	147.2415551	92.27879961	3.209677169	9.578431935	3.080357693	110.3763716	52.81909191	14.2478287	64.93431656	6.514861236	2.54326661	15.7651406	5.78004816	9.621057241	35.52182704	12.82121283	168.0587523	37.34871882	9.886526068	64.67468107	16.11012518
Tivantinib	145.0855485	133.5744622	24.71780691	12.51694627	178.4784051	348.1240446	7.392167487	9.185165333	8.637611041	24.88518544	44.39000313	28.96951837	15.78716424	6.169617615	16.1075567	14.03841103	44.03383511	169.3878722	38.22757138	91.97796415	104.7508561	88.84921174	1314.97126	133.1474371	149.8424564	54.15624822	96.3350115	134.0425477	85.96048689	63.09621915	2.95771284	6.577064266	3.041620566	44.69387872	22.37672356	6.129608818	38.92036252	4.48133922	1.7468896	11.14437724	3.40575565	5.631697064	15.03350225	8.977052725	65.75921162	16.00006721	7.392353408	27.74028739	9.794151486
Tivozanib	160.1294008	138.0005157	26.74247095	14.84995778	179.7675571	371.0465372	7.281539087	9.662430764	9.435379045	25.63916166	49.92818167	31.84090859	15.31983091	8.02771884	20.43241813	15.76104151	43.77985204	170.0992979	47.71337471	99.41448954	116.0107838	93.29447148	1483.50706	142.3062267	171.086088	63.29485383	111.7515063	156.28254	96.72069626	64.88844762	1.596221432	6.245367888	2.364066194	46.35450783	22.44122087	7.60485108	52.497486	4.34294988	1.45824407	14.20203831	3.146610913	4.986945962	15.00920838	7.23333517	69.76643528	16.8064648	7.617622577	29.74490587	8.723222755
Toremifene	128.8711333	140.778572	28.6340397	5.662275092	168.7779781	286.2808705	16.66694461	8.051617006	8.057488118	55.16252281	67.64020266	66.9305076	14.41549541	7.115950925	8.50984893	12.75164346	35.07314916	130.0144791	24.80299181	154.1815416	117.2603249	121.4143233	1127.222945	173.7014303	146.112359	94.25078364	125.4432688	150.6253694	115.0081495	51.3304825	2.426440942	4.579928448	0.886524823	110.0970789	50.45745484	11.55965266	28.03249892	2.810567735	2.0283735	4.517678096	3.256851669	6.902300771	36.77651844	12.26036816	122.4551895	35.40067055	6.056551248	58.75980493	8.707865958
Trametinib_(Mekinst)	505.0236035	363.7298635	52.03792018	23.99774669	521.0637041	822.2177535	19.60466804	23.49012806	24.11832007	67.60127566	98.46810306	71.50799077	47.13648743	14.30253193	33.8841716	49.74349376	67.84872919	462.4422896	71.77602894	242.6997796	252.1221362	206.902633	2999.911702	412.0824871	347.4465075	124.365977	203.1605941	362.997447	218.9915216	150.3149814	6.748500338	18.30469875	7.493805007	118.5915677	56.30883484	12.10923715	73.95319926	11.43849228	4.870463608	22.98948608	7.840821681	13.95973732	37.43889703	17.40240596	228.646532	40.50344335	11.77861259	73.19904161	37.22876195
Trastuzumab	347.6956901	317.8213926	63.06025378	23.49086979	396.90026	747.6340577	21.82270835	24.1105841	18.97503403	75.61361272	115.4236248	89.87088212	41.17542539	20.00803851	35.01853636	29.50090621	115.4197693	341.2450281	125.6870486	225.837968	243.6125278	217.6603792	2903.323124	319.2639956	351.5677573	136.9688561	249.4063689	342.5044492	211.5886569	132.7719733	3.20509478	21.23011933	6.15411061	139.0369778	63.5606654	24.02952872	91.54527066	8.3426328	3.57433503	23.00286952	6.93227325	11.67462393	43.9703703	15.12745036	182.9547645	48.715244	18.37433401	80.35243993	18.86561576
Trebananib	143.3288993	130.3084107	21.42371783	9.594792583	151.7635926	252.9747741	5.636308221	8.602343836	5.061659064	19.11942902	47.28505714	22.11335756	10.07123458	4.605896944	15.71402016	9.048256498	32.38612291	142.1005591	27.85033968	83.9446674	86.60819283	110.7893144	1221.6806	121.1654527	120.7091825	41.62670317	86.01379549	118.4483138	64.6415304	51.99018402	0.662595156	3.679177215	1.329787234	34.56128214	16.76681308	5.433141378	42.25717091	2.282557609	2.035207757	11.88806833	1.090698013	3.1284465	11.0529727	15.50989006	52.04394699	11.45023105	6.440892066	19.89504136	6.224840369
Vandetanib	248.9952668	196.7762105	36.15039701	18.62558087	258.0338509	485.4061164	11.36127285	12.98117774	13.35855561	38.40566159	66.00166803	49.98097817	35.09436287	11.58381125	25.20576617	23.89831846	59.44266815	240.2889653	61.41647878	130.2140245	155.1650628	120.4481291	1888.509917	213.9603652	230.3768968	84.13401882	136.016144	206.1704077	138.5835331	94.55734515	2.318823485	8.524109037	4.415436397	69.72417118	33.12579886	8.096152301	60.00214287	6.164235954	3.643595545	14.54233198	5.737585474	7.185146618	22.22150625	8.5111693	104.2051993	23.98552155	8.198983273	43.25328722	14.38812554
Veliparib	2.529508537	4.602144031	0.950395844	0.541728032	4.048651213	12.85937885	1.041684038	0	1.324068804	3.125052115	4.594169485	3.754933497	0.322770166	0.121832359	0.797448166	0.311817898	4.652815878	4.043762763	3.403883022	6.437791917	6.327552269	5.322650831	66.40313297	4.755363075	10.16275758	4.463648546	7.82841341	9.077604667	5.149823276	1.460603941	0	0	0	6.770946249	3.125052115	0	3.323172837	0	0	0.469483568	0	0	2.083368076	0.514403292	6.031194577	2.083368076	0	3.645894134	0.311817898
Vemurafenib	598.7902339	477.6125132	70.98770967	25.45914905	613.4548234	1032.447931	27.20609654	32.36576224	27.07241437	92.49411169	141.3798476	103.3514958	50.34555749	23.11453114	46.50778402	43.99255528	96.67824309	588.1700017	102.8253016	307.9444443	319.0533248	273.6509878	3875.392121	545.3301117	465.6339621	172.2677143	291.0448661	480.6721783	265.064574	192.5722301	6.184750618	33.57021674	6.205673759	166.2672961	77.54076603	19.20476685	100.4045433	12.91621796	2.665089958	31.26689849	11.05472215	20.97270615	54.11057663	25.83945937	266.2345681	56.28373804	18.9525389	98.44280532	29.91148305
Venetoclax	389.5580282	379.1322071	53.32430589	22.607861	449.2368225	750.2040348	27.64830767	23.90965036	16.28337807	84.31604686	149.687874	97.64299098	30.29914693	14.68894803	38.2368353	30.02799368	101.5671012	371.7482778	109.305072	290.4384606	285.8729349	299.4929307	3381.248194	374.1945608	378.2541923	146.1380993	283.6986806	362.9063945	211.7641291	148.7429914	2.709007031	15.9533912	2.659574468	164.5965739	75.99772564	24.59914109	116.4295385	7.339507328	2.910712521	26.59200814	4.358349776	11.86530284	51.50062975	32.31675512	211.051302	53.64009037	14.9564943	92.8397349	22.42785348
Vinblastine	95.45853703	83.06965412	12.43834126	6.642816648	118.6263414	223.309516	8.059027567	4.391211787	5.374890558	25.65086256	32.29796026	27.17976248	8.625862729	2.313869381	7.979029682	11.21736791	24.48354418	91.10374258	24.42108077	88.22500868	76.86097538	69.07457483	751.6987052	100.5510409	85.4324497	39.19118538	61.84643801	84.49986454	61.5975526	39.67352731	1.684455137	2.777248116	1.920803783	46.02920735	21.4813676	5.854708266	20.27161276	2.01695555	1.431165437	4.554327141	2.897083894	6.412746245	16.22417935	2.808189274	67.01502575	14.91792472	2.913057117	26.3931245	6.989579288
Vincristine	0.405923395	0.519180625	0	0.397332186	1.316397931	3.191718777	0	0	0.063185954	0.193837652	0.03088375	0	0.080651645	0	0.127720178	0.145024751	0.157612505	1.62626983	0.035077359	0.372783508	0.923211865	0.459358987	11.97506245	0.779598112	0.615823623	0.296729698	0.224595233	0.71410966	0.595565632	1.004708244	0.030921459	0	0.177304965	0	0	0	0	0	0.082056181	0	0.153517386	0.480413895	0	0	0.649976122	0	0.018875869	0	0.03118179
Vindesine	0.405923395	0.519180625	0	0.397332186	1.316397931	3.191718777	0	0	0.063185954	0.193837652	0.03088375	0	0.080651645	0	0.127720178	0.145024751	0.157612505	1.62626983	0.035077359	0.372783508	0.923211865	0.459358987	11.97506245	0.779598112	0.615823623	0.296729698	0.224595233	0.71410966	0.595565632	1.004708244	0.030921459	0	0.177304965	0	0	0	0	0	0.082056181	0	0.153517386	0.480413895	0	0	0.649976122	0	0.018875869	0	0.03118179
Vinorelbine	0.405923395	0.519180625	0	0.397332186	1.316397931	3.191718777	0	0	0.063185954	0.193837652	0.03088375	0	0.080651645	0	0.127720178	0.145024751	0.157612505	1.62626983	0.035077359	0.372783508	0.923211865	0.459358987	11.97506245	0.779598112	0.615823623	0.296729698	0.224595233	0.71410966	0.595565632	1.004708244	0.030921459	0	0.177304965	0	0	0	0	0	0.082056181	0	0.153517386	0.480413895	0	0	0.649976122	0	0.018875869	0	0.03118179
Vismodegib	0.506677491	6.157534951	0.143184422	0	6.517023441	23.7180963	0	0	0	0.734214391	0	0	0	0	1.877934272	0.623635797	0.725426052	14.38112705	0	0.258799172	3.377485979	2.981724954	60.55291011	0	1.826327998	3.844522852	3.90807526	2.516200295	0.770668042	2.57867001	0.61842919	0	0	0	0	0.483091787	0	0	0	0	2.606873567	1.4781966	0	0	0	0	0	0	0.623635797
Vorinostat	13.18323456	20.17710325	6.687206566	0.915634788	16.2362745	46.15328854	4.976590584	0.455886929	0.822287501	15.52022552	15.38798619	18.08417185	1.362611706	0.269325178	0.699756498	1.330607763	12.67497996	12.36735054	3.238795165	37.11020178	23.68705587	27.56193912	155.3123728	24.14949809	24.30326816	16.37977495	21.89440121	28.9536355	20.44479512	7.243500086	0.308322405	0.394820761	0.080593166	29.81846906	14.30384483	1.49892227	5.700269749	0.406595342	0.764925624	0.336700662	0.408821987	0.52973528	10.82595141	0.06499963	28.09322121	9.171868778	0.194031288	16.09801857	0.300585883
[truncated: 3,751 more columns]
