# Supplementary material for: Pathway Based Analysis of Mutation Data Is Efficient for Scoring Target Cancer Drugs
Source: Front Pharmacol. 2019 Jan 23;10:1. doi: 10.3389/fphar.2019.00001 (PMC6351482; doi:10.3389/fphar.2019.00001)
Supplement: Supplementary Data Sheet 3 — Mutation drug scores for 3800 TCGA tumor samples for 10 versions of drug scoring algorithm. The dataset contains 10 tables that match the 10 methods of drug scoring. [file Data_Sheet_3.ZIP › MDS_gene.csv]

	TCGA.AG.3881.01	TCGA.63.6202.01	TCGA.MH.A561.01	TCGA.DZ.6135.01	TCGA.BR.8368.01	TCGA.HU.A4GQ.01	TCGA.36.1571.01	TCGA.19.5953.01	TCGA.41.2573.01	TCGA.CZ.4865.01	TCGA.A4.A57E.01	TCGA.02.0114.01	TCGA.81.5911.01	TCGA.27.2526.01	TCGA.BP.4351.01	TCGA.B8.5159.01	TCGA.IN.8663.01	TCGA.AH.6644.01	TCGA.CM.5344.01	TCGA.AA.3685.01	TCGA.EI.6508.01	TCGA.AA.3697.01	TCGA.AA.3977.01	TCGA.AG.A02X.01	TCGA.DC.4745.01	TCGA.AA.3494.01	TCGA.85.6560.01	TCGA.A6.6782.01	TCGA.D5.6533.01	TCGA.G4.6293.01	TCGA.HT.7873.01	TCGA.DU.7294.01	TCGA.DB.A64R.01	TCGA.FG.6690.01	TCGA.DU.6542.01	TCGA.HT.8109.01	TCGA.DU.A5TW.01	TCGA.HT.7877.01	TCGA.HW.8322.01	TCGA.HT.7695.01	TCGA.DU.6393.01	TCGA.QH.A65Z.01	TCGA.HT.8106.01	TCGA.DB.A64P.01	TCGA.DB.A64X.01	TCGA.DU.5851.01	TCGA.06.6701.01	TCGA.HT.7879.01	TCGA.FG.7634.01
Abemaciclib_(LY2835219)	1.859599012	0.978365108	0.452898551	0.510464523	9.209211021	12.74275471	0	0	0.350720657	0	1.158945572	0	0.249875062	0	3.826921285	0.64940026	0.092365046	2.460738879	0	0.700280112	7.582154621	7.305368077	51.0256031	1.458654562	3.023816761	1.531252954	0.681663258	1.649497468	2.044709459	3.435390448	0.25892818	0	0	0	0	0.25892818	0	3.647541244	0.555510392	1.492587944	0	1.733341678	0	1.492587944	1.084672932	0	0	0	0.853870823
Afatinib	0	0	0	0	0	0	0	0	0	0	0	0	0	0	0	0	0	0	0	0	0	0	4.48579039	0	0	0	0.977517107	0	0	2.742066768	0	0	0	0	0	0.957854406	0	0	0	0	0	0	0	0	0	0	0	0	0
Aflibercept	0	1.954767587	0	0	3.704933047	1.186562432	0	0	0	0	0	0	0	0	0	0	0	0	1.082251082	0	0.819000819	2.241570037	10.17807346	0	2.676242025	0	0	2.211420279	0	0	0	0	0	0	0	0	0	0	0	0	0	0.492368291	0	0	0	0	0	0	0
Alectinib	0.239463602	0.831820819	0.879181425	0	3.465322109	9.832050921	0	0	0	0.809061489	0	0.628930818	0	0	2.318977402	0	0	1.611144604	0	0	3.59050806	0.738366386	35.72029953	1.266325607	0.932846737	2.477966426	0.390320062	1.529051988	0.654258862	2.102945113	0	0	0	0	0	0	0	0	0	0	0	0	0	0	1.055798387	0	0	0	0
Alemtuzumab	1.195067849	0.577700751	0	0.564971751	1.264349873	4.714898112	0	0	0	0	0.643500644	0	0.625970039	0	0	0	0.861326443	0	0	0.591016548	0.248941997	0.861326443	21.57244569	2.989067557	3.184830533	0.574712644	0.443852641	0	2.349595633	1.586146308	1.310164115	0	0	0	0	0	0	0	0	0	0	0.577700751	0	0	0	0	0.769822941	0	0
Alitretinoin	0.329706561	0.659413122	0	0.564971751	2.166402998	1.287001287	0	0	0	0	0	0.362318841	0	0	0.729904808	0	0	1.351438524	1.408455213	0	0.248941997	0.77682895	20.15078064	0	0.359582884	0.694658965	0	0	2.771866797	0.631313131	1.310164115	0	0	0.775485786	0	0.329706561	0	0	0	0	0	0	0	0	0	0	0.329706561	0	0
Apalutamide_ARN-509	0	0	0	0.564971751	2.166402998	1.287001287	0	0	0	0.630119723	0	0.362318841	0	0	0	0	0	1.351438524	1.078748652	0	0.248941997	1.663353773	19.77482907	0	0	0	0	0	2.243895165	1.304713805	1.310164115	0	0	0.775485786	0	0	0	0	0	0	0	0	0	0	0	0	0	0	0
Arsenic_trioxide	0	0	0.343997248	0	1.601727702	1.71583941	0	0	0.69735007	0	0	0	0	0	0	0	0	0	0.564971751	0	1.587301587	0.848177642	11.65698506	1.002076885	0.737463127	2.344692981	1.201104067	1.152573131	0	0	0	0	0.737463127	0	0	0	0	0.338066261	0	0	0	0	0	0	0	0	0	0	0
Atezolizumab	0	0	0.343997248	0	1.601727702	1.71583941	0	0	0.69735007	0	0	0	0	0	0	0	0	0	0.564971751	0	1.587301587	0.848177642	10.49162942	1.002076885	0.737463127	2.344692981	1.201104067	1.152573131	0	0	0	0	0.737463127	0	0	0	0	0.338066261	0	0	0	0	0	0	0	0	0	0	0
Avelumab	0	0	0	0	0	0	0	0	0	1.075268817	0	0	0	0	0	0	0	0.583771162	0	0.738685796	0	0	2.070377886	0	0	0	1.387194227	0	0	0	0	0	0	0.430663221	0	0	0	0	0	0	0	0	0	0	0	0	0	0	0
Axitinib	0.329706561	0.659413122	0	0	0	0	0	0	0	0	0	0	0	0	0.729904808	0	0	0	0.329706561	0	0	0	6.805797456	0	0.359582884	0.694658965	0	0	1.8129931	0	1.310164115	0	0	0	0	0.329706561	0	0	0	0	0	0	0	0	0	0	0.329706561	0	0
Belinostat	2.909674784	1.311155039	0.99760941	0.236574403	3.85162037	10.38979806	0	0	0	1.114827202	0	0	0.967492572	0	0	1.075268817	6.893511231	1.343343616	0.176367104	3.169284699	4.755513161	5.417232031	36.92204765	1.571656694	1.838688077	1.531252954	0	2.569236319	3.0074714	1.838566171	0	0	0	0	0	0	0	1.997376228	0	1.492587944	0	1.733341678	0	1.492587944	0.741384226	0	0	0	0
Bevacizumab	37.4091119	46.77906678	9.699879234	3.381570271	76.44333622	139.6744178	2.083368076	6.354794291	2.110301165	9.327013685	14.11380819	9.549156392	3.614883479	3.884527588	4.630011148	3.430906534	9.410625171	40.90702636	15.6101126	34.27232792	41.82476432	38.53188968	545.4733784	42.7742397	48.88871805	20.25792454	40.89247033	52.94808273	30.3124116	27.14292287	1.009243715	5.319225894	0.886524823	14.39429903	6.250104229	5.261655938	9.393165746	2.878774577	1.127657723	5.829217283	2.356424955	1.579341613	5.66653207	5.400112964	19.97536946	6.063858474	6.933438341	9.64406933	1.224236397
Bexarotene	0.577700751	0.577700751	0.638977636	0.564971751	6.014735112	8.217389232	0	0	0	0	0.643500644	0	0	0	0	0	2.14132972	1.384055673	1.533732403	0.90284469	2.762437248	0.861326443	42.04359306	2.560011431	2.677793798	0	1.192611192	1.315879262	5.609240129	1.586146308	1.959936695	0	0	0	0	0	0	0	0.665335995	0	0	0.733614822	0	0	0.863557858	0.968992248	0.769822941	0.624580639	0
Bicalutamide	3.231445425	0.343112998	0.227531286	0	5.149876743	5.694847182	0	0.260213375	0.225988701	0.513081779	0.807083932	0.502765209	0	1.419904479	3.333333333	0	0.224774293	1.512948812	0.500487409	0.704721635	1.432808946	2.010079654	45.61206522	1.559754938	0.586924887	1.166753194	0.52272931	0.616270009	0.337537453	3.752231992	0.132409248	0	0	0	0.513081779	0.161498708	1.764062811	0	0	0	0	3.205128205	0.227531286	0	0	0	0	0	1.130726865
Binimetinib_(MEK162)	0.376328155	0.343112998	0	0	3.315730622	2.223520815	0	0.260213375	0	0.513081779	0.515198351	0.502765209	0	1.419904479	0	0	0.132409248	1.420583767	0.500487409	0	0.529742398	1.335315821	15.40668912	0.947369091	0.494559842	0.208898788	0.132409248	0.408922786	0.337537453	0.473301493	0.132409248	0	0	0	0.513081779	0	0	0	0	0	0	0	0	0	0	0	0	0	0.318825344
Blinatumomab	0.376328155	0.343112998	0	0	3.315730622	2.223520815	0	0.260213375	0	0.513081779	0.515198351	0.502765209	0	1.419904479	0	0	0.132409248	1.420583767	0.500487409	0	0.529742398	1.335315821	15.40668912	0.947369091	0.494559842	0.208898788	0.132409248	0.408922786	0.337537453	0.473301493	0.132409248	0	0	0	0.513081779	0	0	0	0	0	0	0	0	0	0	0	0	0	0.318825344
Bortezomib	0.376328155	0.343112998	0	0	3.315730622	2.223520815	0	0.260213375	0	0.513081779	0.515198351	0.502765209	0	1.419904479	0	0	0.132409248	1.420583767	0.500487409	0	0.529742398	1.335315821	15.40668912	0.947369091	0.494559842	0.208898788	0.132409248	0.408922786	0.337537453	0.473301493	0.132409248	0	0	0	0.513081779	0	0	0	0	0	0	0	0	0	0	0	0	0	0.318825344
Bosutinib	1.495199241	0.343112998	0	0	7.136230355	8.570227932	0	0.260213375	0.946969697	0.513081779	2.123702803	0.502765209	0	2.40222275	0	0.668002672	1.838544563	4.653604135	0.500487409	0	1.942052139	3.418618044	51.05112173	2.386182068	1.753193908	2.49473278	2.601589098	1.487671437	1.147604375	1.842878959	0.132409248	0	0	0	0.513081779	0	0	0	0	0	0	0	0	0	0	0	0	0	0.848956254
Brentuximab_vedotin	1.620156662	0.343112998	0.227531286	0	5.815132171	4.428785826	0	0.260213375	0	0.513081779	0.515198351	0.680627005	0	1.419904479	0	0	0.33272976	2.627204251	0.912878359	0	1.4170798	2.607580452	24.86281692	4.079594779	0.494559842	1.653213979	1.204170244	0.408922786	1.849596121	0.473301493	0.132409248	0	0	0	0.513081779	0	0	0	0	0	0	0	0.227531286	0	0	0	0	0	0.318825344
Brigatinib	2.048765909	0.343112998	0	0	3.315730622	3.236692041	0	0.260213375	0	0.513081779	0.515198351	0.502765209	0	1.419904479	0	0	0.132409248	1.420583767	0.650908589	0	1.487852914	1.485737001	22.38449848	1.571588816	0.494559842	0.208898788	0.756628973	0.408922786	0.337537453	0.473301493	0.132409248	0	0	0	0.513081779	0	0	0	0	0	0	0	0	0	0	0	0	0	0.318825344
Cabazitaxel	0.376328155	0.343112998	0	0	3.315730622	2.223520815	0	0.260213375	0	0.513081779	0.515198351	0.502765209	0	1.419904479	0	0	0.132409248	1.420583767	0.500487409	0	0.529742398	1.335315821	15.40668912	0.947369091	0.494559842	0.208898788	0.132409248	0.408922786	0.337537453	0.473301493	0.132409248	0	0	0	0.513081779	0	0	0	0	0	0	0	0	0	0	0	0	0	0.318825344
Cabozantinib	0.376328155	0.343112998	0	0	3.315730622	2.223520815	0	0.260213375	0	0.513081779	0.515198351	0.502765209	0	1.419904479	0	0	0.132409248	1.420583767	0.500487409	0	0.529742398	1.335315821	15.40668912	0.947369091	0.494559842	0.208898788	0.132409248	0.408922786	0.337537453	0.473301493	0.132409248	0	0	0	0.513081779	0	0	0	0	0	0	0	0	0	0	0	0	0	0.318825344
Carfilzomib	0.376328155	0.343112998	0	0	3.315730622	2.223520815	0	0.260213375	0	0.513081779	0.515198351	0.502765209	0	1.419904479	0	0	0.132409248	1.420583767	0.500487409	0	0.529742398	1.335315821	15.40668912	0.947369091	0.494559842	0.208898788	0.132409248	0.408922786	0.337537453	0.473301493	0.132409248	0	0	0	0.513081779	0	0	0	0	0	0	0	0	0	0	0	0	0	0.318825344
Ceritinib_(Zykadia_LDK378)	0.376328155	0.343112998	0	0	3.315730622	2.223520815	0	0.260213375	0	0.513081779	0.515198351	0.502765209	0	1.419904479	0	0	0.132409248	1.420583767	0.500487409	0	0.529742398	1.335315821	15.40668912	0.947369091	0.494559842	0.208898788	0.132409248	0.408922786	0.337537453	0.473301493	0.132409248	0	0	0	0.513081779	0	0	0	0	0	0	0	0	0	0	0	0	0	0.318825344
Cetuximab	0.376328155	0.343112998	0	0	3.315730622	2.223520815	0	0.260213375	0	0.513081779	0.515198351	0.502765209	0	1.419904479	0	0	0.132409248	1.420583767	0.500487409	0	0.529742398	1.335315821	15.40668912	0.947369091	0.494559842	0.208898788	0.132409248	0.408922786	0.337537453	0.473301493	0.132409248	0	0	0	0.513081779	0	0	0	0	0	0	0	0	0	0	0	0	0	0.318825344
Cobimetinib	2.325631742	0.343112998	0	0	5.195226103	9.032801584	0	0.260213375	0	0.513081779	0.515198351	0.935665642	0	1.419904479	0	0	0.132409248	1.420583767	1.125711497	0.625224088	3.089468904	2.314297322	34.1545402	3.965406323	2.502915748	1.122140797	0.132409248	2.764106709	3.554258016	1.740016331	0.132409248	0	0	0	0.513081779	0	0	0	0.827129859	0	0.288850376	0	0	0	0	0	0	0	1.130726865
Crizotinib	0.376328155	0.343112998	0	0	3.315730622	2.223520815	0	0.260213375	0	0.513081779	0.515198351	0.502765209	0	1.419904479	0	0	0.132409248	1.420583767	0.500487409	0	0.529742398	1.335315821	15.40668912	0.947369091	0.494559842	0.208898788	0.132409248	0.408922786	0.337537453	0.473301493	0.132409248	0	0	0	0.513081779	0	0	0	0	0	0	0	0	0	0	0	0	0	0.318825344
CYT387_(Momelotinib)	0.376328155	0.343112998	0.227531286	0	3.315730622	4.774854617	0	0.260213375	0	0.513081779	0.515198351	0.502765209	0.881834215	1.419904479	0	0	0.132409248	2.078045963	0.500487409	0.664010624	1.237901	2.769392342	27.82932127	1.742914039	2.525791245	0.208898788	0.614104816	0.408922786	0.337537453	1.428411331	0.132409248	0	0	0	0.513081779	0	0.474158369	0	0	0	0	0	0.227531286	0	0	0	0	0	0.318825344
Dabrafenib	3.139080379	0.343112998	0.227531286	0	5.149876743	5.694847182	0	0.260213375	0	0.513081779	0.807083932	0.502765209	0	1.419904479	0	0	0.132409248	1.420583767	0.500487409	0.704721635	1.3404439	1.335315821	44.74726339	1.467389892	0.494559842	1.166753194	0.52272931	0.523904963	0.337537453	3.07746816	0.132409248	0	0	0	0.513081779	0.161498708	1.764062811	0	0	0	0	3.205128205	0.227531286	0	0	0	0	0	1.130726865
Daratumumab	0.376328155	0.343112998	0	0	3.315730622	2.223520815	0	0.260213375	0	0.513081779	0.515198351	0.502765209	0	1.419904479	0	0	0.132409248	1.420583767	0.500487409	0	0.529742398	1.335315821	15.40668912	0.947369091	0.494559842	0.208898788	0.132409248	0.408922786	0.337537453	0.473301493	0.132409248	0	0	0	0.513081779	0	0	0	0	0	0	0	0	0	0	0	0	0	0.318825344
Dasatinib	0.376328155	0.343112998	0	0	3.315730622	2.223520815	0	0.260213375	0	0.513081779	0.515198351	0.502765209	0	1.419904479	0	0	0.132409248	1.420583767	0.500487409	0	0.529742398	1.335315821	15.40668912	0.947369091	0.494559842	0.208898788	0.132409248	0.408922786	0.337537453	0.473301493	0.132409248	0	0	0	0.513081779	0	0	0	0	0	0	0	0	0	0	0	0	0	0.318825344
Degarelix	0.376328155	0.343112998	0	0	4.421811253	2.223520815	0	0.260213375	0	0.513081779	1.116883069	0.502765209	0	1.419904479	0	0	0.132409248	1.420583767	0.500487409	1.038421599	0.529742398	1.817198218	17.06333315	1.646181111	0.494559842	0.208898788	0.132409248	0.408922786	0.337537453	0.473301493	0.132409248	0	0	0	0.513081779	0	0	0	0	0	0	0	0	0	0	0	0	0	0.318825344
Denileukin_diftitox_(Ontac)	0.376328155	0.343112998	0	0	3.315730622	2.223520815	0	0.260213375	0	0.513081779	0.515198351	0.502765209	0	1.419904479	0	0	0.132409248	1.420583767	0.500487409	0	0.529742398	1.335315821	15.40668912	0.947369091	0.494559842	0.208898788	0.132409248	0.408922786	0.337537453	0.473301493	0.132409248	0	0	0	0.513081779	0	0	0	0	0	0	0	0	0	0	0	0	0	0.318825344
Denosumab	1.495199241	0.343112998	0	0	7.136230355	8.570227932	0	0.260213375	0.946969697	0.513081779	2.123702803	0.502765209	0	2.40222275	0	0.668002672	1.838544563	4.653604135	0.500487409	0	1.942052139	3.418618044	51.05112173	2.386182068	1.753193908	2.49473278	2.601589098	1.487671437	1.147604375	1.842878959	0.132409248	0	0	0	0.513081779	0	0	0	0	0	0	0	0	0	0	0	0	0	0.848956254
Docetaxel	13.53507311	13.57214591	0.236574403	0.236574403	13.16172504	15.27348913	2.4750241	1.158331232	2.16916853	6.763186008	6.765302581	8.845542023	1.863286005	2.769096002	0.825082508	0.791579398	6.77284772	6.90508493	0.773820602	13.65267611	10.87383739	11.5424218	83.4801812	15.14128159	9.161668069	9.790873933	9.298665321	16.11653396	9.023577381	2.316067191	0.783450914	0	0	13.5418925	6.763186008	0	2.083368076	0.562113547	0.260824204	0	0	0	4.166736153	0.26816841	13.05170143	4.166736153	0.909194051	7.291788268	0.318825344
Dovitinib	0.376328155	0.343112998	0	0	3.315730622	2.223520815	0	0.260213375	0	0.513081779	0.515198351	0.502765209	0	1.419904479	0	0	0.132409248	1.420583767	0.500487409	0	0.529742398	1.335315821	15.40668912	0.947369091	0.494559842	0.208898788	0.132409248	0.408922786	0.337537453	0.473301493	0.132409248	0	0	0	0.513081779	0	0	0	0	0	0	0	0	0	0	0	0	0	0.318825344
Durvalumab	0.376328155	0.343112998	0	0	3.315730622	2.223520815	0	0.260213375	0	0.513081779	0.515198351	0.502765209	0	1.419904479	0	0	0.132409248	1.420583767	0.500487409	0	0.529742398	1.335315821	15.40668912	0.947369091	0.494559842	0.208898788	0.132409248	0.408922786	0.337537453	0.473301493	0.132409248	0	0	0	0.513081779	0	0	0	0	0	0	0	0	0	0	0	0	0	0.318825344
Elotuzumab	0.376328155	0.343112998	0	0	3.315730622	2.223520815	0	0.260213375	0	0.513081779	0.515198351	0.502765209	0	1.419904479	0	0	0.132409248	1.420583767	0.500487409	0	0.529742398	1.335315821	15.40668912	0.947369091	0.494559842	0.208898788	0.132409248	0.408922786	0.337537453	0.473301493	0.132409248	0	0	0	0.513081779	0	0	0	0	0	0	0	0	0	0	0	0	0	0.318825344
Enzalutamide	0.376328155	0.343112998	0	0	3.315730622	2.223520815	0	0.260213375	0	0.513081779	0.515198351	0.502765209	0	1.419904479	0	0	0.132409248	1.420583767	0.500487409	0	0.529742398	1.335315821	15.40668912	0.947369091	0.494559842	0.208898788	0.132409248	0.408922786	0.337537453	0.473301493	0.132409248	0	0	0	0.513081779	0	0	0	0	0	0	0	0	0	0	0	0	0	0.318825344
Erlotinib	0.376328155	0.343112998	0.227531286	0	3.315730622	2.691521283	0	0.260213375	0	0.513081779	0.515198351	0.502765209	0.881834215	1.419904479	0	0	0.132409248	1.420583767	0.500487409	0	1.237901	2.769392342	19.80112823	1.742914039	1.446940794	0.208898788	0.614104816	0.408922786	0.337537453	1.428411331	0.132409248	0	0	0	0.513081779	0	0.474158369	0	0	0	0	0	0.227531286	0	0	0	0	0	0.318825344
Estramustine	0.376328155	0.343112998	0	0	3.315730622	2.223520815	0	0.260213375	0	0.513081779	0.515198351	0.502765209	0	1.419904479	0	0	0.132409248	1.420583767	0.500487409	0	0.529742398	1.335315821	15.40668912	0.947369091	0.494559842	0.208898788	0.132409248	0.408922786	0.337537453	0.473301493	0.132409248	0	0	0	0.513081779	0	0	0	0	0	0	0	0	0	0	0	0	0	0.318825344
Everolimus	0.376328155	0.343112998	0	0	3.315730622	2.223520815	0	0.260213375	0	0.513081779	0.515198351	0.502765209	0	1.419904479	0	0	0.132409248	1.420583767	0.500487409	0	0.529742398	1.335315821	15.40668912	0.947369091	0.494559842	0.208898788	0.132409248	0.408922786	0.337537453	0.473301493	0.132409248	0	0	0	0.513081779	0	0	0	0	0	0	0	0	0	0	0	0	0	0.318825344
Exemestane	0.376328155	0.343112998	0	0	3.315730622	2.223520815	0	0.260213375	0	0.513081779	0.515198351	0.502765209	0	1.419904479	0	0	0.132409248	1.420583767	0.500487409	0	0.529742398	1.335315821	15.40668912	0.947369091	0.494559842	0.208898788	0.132409248	0.408922786	0.337537453	0.473301493	0.132409248	0	0	0	0.513081779	0	0	0	0	0	0	0	0	0	0	0	0	0	0.318825344
Flavopiridol_(Alvociclib)	2.129572455	2.14925129	3.180875646	0	6.865743621	9.884434771	0	0.456895195	0.134116472	0.513081779	0.515198351	0.502765209	0.954230701	1.419904479	0	0	0.816893704	4.395682581	0.500487409	0	1.999752343	2.815019006	44.55187073	2.34040039	2.388112229	0.573576072	0.46320754	2.986931298	1.819533303	1.01161571	0.441623842	0.19668182	0	0	0.513081779	0	0.414593698	0.562113547	0	0	0	1.03017382	0	0	0.741684653	0	0.249500998	0	0.853870823
Foretinib	0.376328155	0.343112998	0	0	3.315730622	2.223520815	0	0.260213375	0	0.513081779	0.515198351	0.502765209	0	1.419904479	0	0	0.132409248	1.420583767	0.500487409	0	0.529742398	1.335315821	15.40668912	0.947369091	0.494559842	0.208898788	0.132409248	0.408922786	0.337537453	0.473301493	0.132409248	0	0	0	0.513081779	0	0	0	0	0	0	0	0	0	0	0	0	0	0.318825344
Fulvestrant	1.714769214	2.920306056	0	0	6.444555869	6.106052918	0	0.260213375	0.249875062	0.513081779	0.515198351	0.502765209	1.522614494	1.419904479	0	0	0.132409248	3.001619965	0.500487409	1.013171226	2.38640442	3.216018833	41.22118257	1.742914039	0.946843876	0.208898788	1.204595342	1.083686618	1.434028681	0.473301493	0.935622099	0.803212851	0.803212851	0.803212851	1.31629463	0.803212851	0.803212851	0.803212851	0.803212851	0.803212851	1.623695337	0.803212851	0.803212851	0.803212851	0.803212851	0.803212851	1.925547307	0.803212851	1.721558579
Ganetespib_(STA-9090)	1.714769214	2.920306056	0	0	6.444555869	6.106052918	0	0.260213375	0.249875062	0.513081779	0.515198351	0.502765209	0	1.419904479	0	0	0.132409248	3.001619965	0.500487409	1.013171226	2.38640442	2.155798307	41.22118257	1.742914039	0.946843876	0.208898788	1.204595342	1.083686618	1.434028681	0.473301493	0.935622099	0.803212851	0.803212851	0.803212851	1.31629463	0.803212851	0.803212851	0.803212851	0.803212851	0.803212851	1.623695337	0.803212851	0.803212851	0.803212851	0.803212851	0.803212851	0.803212851	0.803212851	1.721558579
Gefitinib	1.714769214	2.920306056	0	0	6.444555869	6.106052918	0	0.260213375	0.249875062	0.513081779	0.515198351	0.502765209	0	1.419904479	0	0	0.132409248	3.001619965	0.500487409	1.013171226	2.38640442	2.155798307	41.22118257	1.742914039	0.946843876	0.208898788	1.204595342	1.083686618	1.434028681	0.473301493	0.935622099	0.803212851	0.803212851	0.803212851	1.31629463	0.803212851	0.803212851	0.803212851	0.803212851	0.803212851	1.623695337	0.803212851	0.803212851	0.803212851	0.803212851	0.803212851	0.803212851	0.803212851	1.721558579
Goserelin	1.714769214	2.920306056	0	0	6.444555869	6.106052918	0	0.260213375	0.249875062	0.513081779	0.515198351	0.502765209	0	1.419904479	0	0	0.132409248	3.001619965	0.500487409	1.013171226	2.38640442	2.155798307	41.22118257	1.742914039	0.946843876	0.208898788	1.204595342	1.083686618	1.434028681	0.473301493	0.935622099	0.803212851	0.803212851	0.803212851	1.31629463	0.803212851	0.803212851	0.803212851	0.803212851	0.803212851	1.623695337	0.803212851	0.803212851	0.803212851	0.803212851	0.803212851	0.803212851	0.803212851	1.721558579
Homoharringtonine_(Omacetaxine_mepesuccinate)	0.4686932	0.343112998	0	0	3.315730622	2.223520815	0	0.260213375	0.225988701	0.513081779	0.515198351	0.502765209	0	1.419904479	3.333333333	0	0.224774293	1.512948812	0.500487409	0	0.622107443	2.010079654	16.27149095	1.039734137	0.586924887	0.208898788	0.132409248	0.501287831	0.337537453	1.148065326	0.132409248	0	0	0	0.513081779	0	0	0	0	0	0	0	0	0	0	0	0	0	0.318825344
Ibritumomab_tiuxetan	5.275484249	0.343112998	0.807102502	0	5.75762932	10.43988166	0	0.260213375	0	0.513081779	0.515198351	0.935665642	0	1.419904479	0	1.557632399	0.132409248	1.420583767	1.125711497	0.625224088	3.089468904	2.314297322	41.28150114	3.965406323	3.664355934	1.122140797	0.132409248	2.764106709	3.554258016	1.740016331	0.132409248	0	0	0	0.513081779	0	0	0	0.827129859	0.562403218	0.288850376	0	0	0	0	0	0	0	1.130726865
Ibrutinib	0.376328155	0.343112998	0	0	3.315730622	2.223520815	0	0.260213375	0	0.513081779	0.515198351	0.502765209	0	1.419904479	0	0	0.132409248	1.420583767	0.500487409	0	0.529742398	1.335315821	15.40668912	0.947369091	0.494559842	0.208898788	0.132409248	0.408922786	0.337537453	0.473301493	0.132409248	0	0	0	0.513081779	0	0	0	0	0	0	0	0	0	0	0	0	0	0.318825344
Idelalisib	0.376328155	0.343112998	0	0	3.315730622	2.223520815	0	0.260213375	0	0.513081779	0.515198351	0.502765209	0	1.419904479	0	0	0.132409248	1.420583767	0.500487409	0	0.529742398	1.335315821	15.40668912	0.947369091	0.494559842	0.208898788	0.132409248	0.408922786	0.337537453	0.473301493	0.132409248	0	0	0	0.513081779	0	0	0	0	0	0	0	0	0	0	0	0	0	0.318825344
Imatinib	0.376328155	0.343112998	0	0	3.315730622	2.223520815	0	0.260213375	0	0.513081779	0.515198351	0.502765209	0	1.419904479	0	0	0.132409248	1.420583767	0.500487409	0	0.529742398	1.335315821	15.40668912	0.947369091	0.494559842	0.208898788	0.132409248	0.408922786	0.337537453	0.473301493	0.132409248	0	0	0	0.513081779	0	0	0	0	0	0	0	0	0	0	0	0	0	0.318825344
Inotuzumab_ozogamicin	1.096491228	0	0	0	0	1.740116867	0	0	0	0	0	0	0	0	0	0.309501702	0	0.715307582	0	1.782144835	0	0	6.666277739	0	0.660066007	1.430615165	1.430615165	0	0	0	0	0	0	0	0	0	0	0	0	0	0	0	0	0	0	0	0	0	0
Ipilimumab	1.096491228	0	0	0	0.681663258	3.17765557	0	0	0	0	0	0	0	0	0	0.309501702	0	0.624008359	0.681663258	0.634920635	1.131485475	0	12.21826979	0	1.834659593	0	0	0	1.696634076	1.234467415	0	0	0	0	0	0	0	0	0	0	0	0	0	0	0	0	0	0	0
Ixabepilone	1.096491228	0	0	0	0	1.740116867	0	0	0	0	0	0	0	0	0	0.309501702	0	0.715307582	0	1.782144835	0	0	6.666277739	0	0.660066007	1.430615165	1.430615165	0	0	0	0	0	0	0	0	0	0	0	0	0	0	0	0	0	0	0	0	0	0
Ixazomib_(MLN9708)	16.43183354	13.06328292	1.579080066	1.269819517	16.42491383	29.5928923	0	1.970557881	1.489839797	0.171644353	0.459271229	0.589034562	1.720497902	1.068747226	1.861589115	1.031632533	2.09187973	10.5453585	3.724940789	9.585860583	12.92352434	7.433625244	99.01844347	11.51740354	7.593645829	1.461567065	3.313867045	7.133120833	5.414458936	5.003009924	0.904005876	0	0.886524823	0.171644353	0	0	2.35856886	0.562113547	0.555510392	0.661660586	0.130718954	0	1.104469192	0.446827525	4.400643916	0.888888889	0	0.553361532	0.623635797
Lapatinib	10.80506557	6.856235254	2.801612255	1.880126775	17.21983428	25.17493192	0	1.432337105	0.220312844	0.58831102	1.174100773	0.432900433	0.895415394	0	0	0.623635797	2.122373242	10.50904027	2.447312888	5.563933086	5.359738474	6.609474562	67.17493474	12.13608779	4.174580781	1.187988285	4.133146691	2.958608197	6.396974383	4.085952421	0	0	0.886524823	0.451991984	0	0	1.734349134	0.562113547	0	1.492587944	0	0	0	1.778956787	0.923361034	0.888888889	0	1.926782274	0.623635797
Lenalidomide	24.48817335	27.07438343	10.39459512	4.863573518	43.92117379	90.98784652	2.680739642	2.60416468	2.259532061	8.804835962	9.777718935	9.566294176	2.438115412	1.705808763	4.964917873	3.424202594	13.7741083	37.75367217	8.553702008	29.36748023	32.75551597	25.38039434	322.7287221	25.08539462	39.05566554	15.69228414	19.13077746	30.30656747	25.06981016	18.00786768	0.670355801	5.498351732	0.886524823	13.71353685	8.533209252	0.670690812	9.572346048	1.650165017	3.743853356	1.600627722	1.800936746	2.318439913	5.8102563	0.714995934	19.22665551	5.450207802	0.895186795	7.8451498	0.623635797
Lenvatinib	12.95598946	5.910821818	4.903794691	1.083456063	18.05200563	27.361633	0	0.241069316	0.444444444	0.29757356	2.803204721	0.456621005	0.895415394	0.243664717	1.594896332	1.282397325	5.345360527	25.85894284	3.207966977	1.184661899	6.720328949	3.707426374	88.99512588	8.207463301	12.59152268	2.62475176	2.42734087	7.538697271	6.96285926	5.709439276	0	0	0	0	2.283105023	0	6.058425457	0	0.562113547	0.938967136	0.130718954	0	0	0	2.389069842	0	0	0	0.623635797
Letrozole	8.440209929	5.722726746	0	0.813993769	10.78412577	10.7233755	0	0	0	0	1.543600934	0	0	0	0	0	2.50423944	11.64218237	0.48054645	1.869996871	5.965556591	1.124288384	28.25902807	5.920089032	3.432705217	0.48054645	3.373825239	3.64071328	1.955233551	1.1441692	0	0	0	0	0	0	0.881834215	0	0.813993769	0	0	0	0	0	1.707171779	0	0.377517388	0	0
Leuprolide	8.440209929	5.722726746	0	0.813993769	10.78412577	10.7233755	0	0	0	0	1.543600934	0	0	0	0	0	2.50423944	11.64218237	0.48054645	1.869996871	5.965556591	1.124288384	28.25902807	5.920089032	3.432705217	0.48054645	3.373825239	3.64071328	1.955233551	1.1441692	0	0	0	0	0	0	0.881834215	0	0.813993769	0	0	0	0	0	1.707171779	0	0.377517388	0	0
Lomustine	8.440209929	5.722726746	0	0.813993769	10.78412577	10.7233755	0	0	0	0	1.543600934	0	0	0	0	0	2.50423944	11.64218237	0.48054645	1.869996871	5.965556591	1.124288384	28.25902807	5.920089032	3.432705217	0.48054645	3.373825239	3.64071328	1.955233551	1.1441692	0	0	0	0	0	0	0.881834215	0	0.813993769	0	0	0	0	0	1.707171779	0	0.377517388	0	0
Masitinib	0	0	0	0	1.64271872	0.920810313	0	0	0	0	0	0	0	0	0	0	0	0.74906367	0.971817298	0	0	0	9.970242428	0	0	0	0	0	0.74906367	2.143622722	0	0	0	0	0	0	0	0	0	0	0	0	0	0	0	0	0	0	0
Medroxyprogesterone_acetate_(MPA)	2.577278519	1.872945211	1.437596857	0	7.776355696	23.83631577	0	0	0.225988701	0	1.718776453	0	0.249875062	0	0.493587951	1.273036056	0	8.610473039	0	3.278450633	9.047441737	7.27039951	59.05291685	2.344127104	3.582476452	1.713302836	0.623635797	1.945755972	2.044709459	3.412996812	0.25892818	0	0	0	0	0.25892818	0	4.303613766	0.555510392	1.492587944	0	1.733341678	0	1.492587944	1.084672932	0	0	0	0.623635797
Megestrol	8.834873226	3.154893808	1.329003795	0.564971751	5.261689583	14.38825781	0	0	0.249875062	0	0.643500644	0	1.522614494	0.217722621	3.333333333	0	0.861326443	1.581036198	0	4.03788276	3.170566745	3.173249808	70.30402215	7.24210931	3.116234053	0.217722621	1.516038735	0.674763833	2.828719764	4.190312974	2.113376967	0.803212851	0.803212851	0.803212851	0.803212851	0.803212851	1.21780655	0.803212851	0.803212851	0.803212851	1.623695337	1.380913602	0.803212851	0.803212851	0.803212851	0.803212851	2.695370248	0.803212851	1.402733235
Methyltestosterone	0.577700751	0.577700751	0	0.564971751	3.057506037	6.97700355	0	0	0	0	0.643500644	0	0	0.217722621	0	0	0.861326443	0	0	1.255027173	0.717952909	1.292546796	28.66085989	3.096935689	3.116234053	0.217722621	0.443852641	0	1.732228536	1.586146308	1.310164115	0	0	0	0	0	0.414593698	0	0	0	0	0.577700751	0	0	0	0	0.769822941	0	0
Midostaurin	3.589881276	1.592562657	3.530025154	0	9.550413143	23.7005312	0	0.299490866	0	0	0.291885581	0.359582884	0	0.767773732	0	4.092799593	0	3.584999798	0.534658016	1.607566325	3.203881118	5.228170358	73.74045405	5.078081019	3.568883148	0.957854406	1.613722571	4.561445753	3.618640259	3.364082822	1.310164115	0	0	0	0	0.161498708	2.178656509	0.562113547	0	0	0.130718954	1.051971419	0.227531286	0.26816841	0.249500998	0.393081761	0.517669408	0	0.623635797
Mogamulizumab	3.589881276	1.592562657	3.530025154	0	9.844617321	23.7005312	0	0.299490866	0	0	0.291885581	0.359582884	0	0.767773732	0	4.092799593	0	3.584999798	0.828862194	1.607566325	4.065207561	5.228170358	74.60178049	5.078081019	3.568883148	1.844379229	1.613722571	4.561445753	3.618640259	3.364082822	1.310164115	0	0	0	0	0.161498708	2.178656509	0.562113547	0	0	0.130718954	1.051971419	0.227531286	0.26816841	0.249500998	0.393081761	0.517669408	0	0.623635797
Moxetumomab_pasudotox	0.577700751	0.577700751	0	0.564971751	1.264349873	3.745905864	0	0	0	0	0.643500644	0	0	0	0	0	0.861326443	0	0	0.591016548	0.248941997	0.861326443	17.82367027	1.841620626	2.037383603	0	0.443852641	0	1.732228536	1.586146308	1.310164115	0	0	0	0	0	0	0	0	0	0	0.577700751	0	0	0	0	0.769822941	0	0
Necitumumab	6.918731415	0	1.329003795	0	2.600258666	7.127986198	0	0	0	0	0	0	1.522614494	0.217722621	3.333333333	0	0	0	0	1.368732259	0.469010913	0.431220354	34.08673502	0.945678764	0.626566416	0.217722621	0	0	1.483286539	2.604166667	0	0	0	0	0	0	0.414593698	0	0	0	0	0	0	0	0	0	0.769822941	0	0
Nilotinib	10.46988814	0.788404502	1.556535081	0.564971751	4.179051767	16.36124747	0	0	0	0	0.935386224	0	1.522614494	0	3.333333333	0	0.861326443	0.155914071	0	2.27157695	2.632473571	1.292546796	75.11728216	4.236414746	3.512864783	0.957854406	0.990086774	1.43086144	1.732228536	4.190312974	1.310164115	0	0	0	0	0.161498708	2.178656509	0	0	0	0	3.938743027	0.227531286	0	0	0	0.769822941	0	1.665772344
Nilutamide	1.195067849	0.577700751	0	0.564971751	3.057506037	7.728273177	0	0	0	0	0.643500644	0	0.625970039	0	0	0	0.861326443	0	0	0.591016548	0.717952909	1.292546796	27.16439129	3.448837672	3.184830533	0.574712644	0.443852641	0	2.349595633	1.586146308	1.310164115	0	0	0	0	0	0.414593698	0	0	0	0	0.577700751	0	0	0	0	0.769822941	0	0
Nimotuzumab	0.577700751	0.577700751	0	0.564971751	3.057506037	6.759280929	0	0	0	0	0.643500644	0	0	0	0	0	0.861326443	0	0	0.591016548	0.717952909	1.292546796	23.41561587	2.301390741	2.037383603	0	0.443852641	0	1.732228536	1.586146308	1.310164115	0	0	0	0	0	0.414593698	0	0	0	0	0.577700751	0	0	0	0	0.769822941	0	0
Nintedanib_(BIBF_1120)	2.206520519	0.210703751	0	0	4.743836786	6.055642847	0	0	0.946969697	0	0	0	0	0	0	0	0.507356672	0	0	0.669344043	2.621048102	1.879881844	31.90121309	1.190494666	4.618341441	0	10.43811497	1.514463123	3.677418925	1.052084691	0	0	0	0	0	0	0.414593698	0	0	0	0	0	0	0	0	0.968992248	0.769822941	0	0.535045479
Niraparib	31.99417415	41.21589176	6.542683749	3.000874476	61.78614315	106.5246209	2.083368076	5.118268386	2.110301165	8.212186484	13.09840374	9.549156392	3.614883479	3.884527588	2.813060601	3.037360686	9.410625171	34.38657518	14.21639912	31.42191803	31.51784595	31.00933339	437.4017762	38.1552451	42.40048566	18.89733517	34.96477055	44.88766888	25.20109378	23.2976378	0.568142775	4.918811347	0.886524823	13.99388448	6.250104229	4.861241391	9.393165746	0.881398349	0.171732784	3.673938815	1.237646909	0.999631468	5.439000784	3.90752502	18.5309695	6.063858474	6.683937343	9.64406933	1.224236397
Nivolumab_(BMS-936558)	1.135000795	1.206273557	4.000047233	0.236574403	2.744315779	5.770887483	0.833333333	0	0.833656735	0	0	0	0.645540332	0	0	0	0	0.313283208	1.612285084	0	2.966550692	2.470727249	23.5880786	0.377500944	1.094685518	0.198886237	1.919384332	2.253240293	1.360967664	0	0	0	0	0.280347631	0	0	0.881834215	0	0	0	0	0	0	0	0	0	0	0	0
Obinutuzumab	0	0.925925926	0.236574403	0.236574403	1.301226505	1.03621485	0.833333333	0	0.833656735	0	0	0	0.645540332	0	0	0	0	0	1.612285084	0	2.087777588	1.159331149	9.326957518	0	0.236574403	0	1.291033775	1.930555556	0.816235886	0	0	0	0	0	0	0	0.881834215	0	0	0	0	0	0	0	0	0	0	0	0
Ofatumumab	2.322222576	2.076744436	0	0.564971751	7.510713481	14.78288853	0	0	0	0	0.643500644	0	0.625970039	0	0.729904808	1.400560224	0.861326443	0.916949079	0.329706561	0.90284469	1.821772069	2.169739779	55.24637518	4.167228476	5.51171055	1.269371609	0.599766712	1.315879262	3.67353873	2.852861145	1.310164115	0	0	0	0	0.329706561	0.414593698	0	0	0	0	0.733614822	0	0	0	0	1.099529502	0	0
Olaparib	1.52477441	2.076744436	0	0.564971751	6.96958794	13.1036809	0	0	0	0	0.643500644	0	0.625970039	0	0.729904808	0	0.861326443	0.916949079	0.329706561	0.90284469	1.821772069	2.169739779	51.62583517	4.167228476	5.51171055	1.269371609	0.599766712	1.315879262	3.67353873	2.852861145	1.310164115	0	0	0	0	0.329706561	0.414593698	0	0	0	0	0.733614822	0	0	0	0	1.099529502	0	0
Olaratumab	2.602361279	7.563675163	0.274961442	0	1.389341405	9.158651491	2.083368076	0	0	6.250104229	6.46255602	7.68772879	0	0.217722621	0	0.273672687	0.212451791	0.573880721	0.191293574	12.97996828	7.671227467	10.51045022	34.19436469	6.345081591	7.556548659	6.467826851	10.0276111	7.692835347	8.06594629	0.479759818	0	0	0	13.5418925	6.250104229	0	2.083368076	0	0	0	0	0	4.705787108	0	11.45852442	4.166736153	0	7.291788268	0
Osimertinib	0	0	0	0	0.807102502	0.472813239	0	0	0	0	0	0	0	0	0	0.668002672	0	0.797448166	0.32488629	0	0.443852641	0	6.803173244	0	2.146975831	0	1.151455119	1.344086022	0.443852641	0	0	0	0	0	0	0	0.472813239	0	0	0	0	0	0	0	0	0	0	0	0
Paclitaxel	2.433681414	3.15264099	0.108790252	0	3.792177107	5.217116245	0	0.567782065	1.525343952	0.19436346	0.20487605	0.241309909	0	0	0	0.668002672	0.244825478	1.966033183	0.73727724	0.659959576	1.521872149	3.958272416	42.28303693	2.13182692	2.620747121	0.725813646	2.596626996	4.095640154	2.407012357	1.033828901	0	0	0	0	0	0	0.472813239	0	0	0	0	0.49382716	0	0	0.429493105	0.58894622	0	0	0
Palbociclib	0	2.820949472	0	0	0.508130081	1.844854515	0	0	0	0	0	0	0	0.982318271	0	0	0	0.412541254	0	0.979127386	1.463460543	0	18.3482527	0.365096751	1.559535204	0	0	0	0.730193501	0	0	0	0	0	0	0	0.669344043	0	0	0	0	0	0	0	0	0	0	0	0
Panitumumab	0	2.820949472	0	0	0.508130081	1.844854515	0	0	0	0	0	0	0	0.982318271	0	0	0	0.412541254	0	0.979127386	1.463460543	0	18.3482527	0.365096751	1.559535204	0	0	0	0.730193501	0	0	0	0	0	0	0	0.669344043	0	0	0	0	0	0	0	0	0	0	0	0
Panobinostat	0	2.820949472	0	0	0.508130081	1.844854515	0	0	0	0	0	0	0	0.982318271	0	0	0	0.412541254	0	0.979127386	1.463460543	0	17.26722243	0.365096751	1.559535204	0	0	0	0.730193501	0	0	0	0	0	0	0	0.669344043	0	0	0	0	0	0	0	0	0	0	0	0
Pazopanib	1.736616971	5.344847271	3.279431546	0	6.468120802	7.038133919	0	0	1.371120754	0	0	0.276428543	0	0	0	0	0.552791598	2.218356541	0	1.87715666	3.03095265	0.766694695	35.67270525	3.997373293	5.427894388	2.283105023	3.612976164	0	1.893806995	0.396825397	0	0	0	0	2.283105023	0	0	0	0	0	0	0	0	0	0.452898551	0	0	0	0
Pembrolizumab	25.3658395	29.27165794	6.60130702	1.083456063	32.92259377	56.41363909	2.083368076	3.870797702	1.773925183	9.124571204	10.38036312	9.549156392	2.857334599	3.884527588	5.061926445	2.393049845	6.053151793	25.68513527	7.814783389	24.30727282	22.43977461	29.06098624	314.4296955	25.80830974	30.81789699	17.55433599	26.18810603	31.9906367	19.77559962	12.51421947	0	3.378684807	0	13.82224013	6.250104229	0.907938736	6.646345673	0	0	2.639743824	0.130718954	0.999631468	5.802504964	3.90752502	16.35786934	5.644571262	4.612647478	7.291788268	2.014125813
Perifosine	1.098793109	2.001873171	0	0	7.850357311	22.65908152	0	1.498919896	0	0	0.881834215	0	0.946969697	0	2.210261669	0	1.784013264	9.381861763	1.814943278	0	0.702965292	1.431141379	68.47309062	1.14729021	1.677376448	2.595974287	3.210191128	6.858315577	1.643688771	3.913747788	1.166112624	0	0	0	0	0	0	0	0	2.405498323	0	0	0	3.03030303	2.898550725	0	1.718213058	0	0
Pertuzumab	0.329706561	0.659413122	0	0	1.230016095	2.29813452	0	0	0	0	0	0	0	0	0.729904808	0	0	0	1.17573025	0	0	0	9.785472799	0.718390805	0	0.694658965	0.713775874	0	0.329706561	0	0.803212851	0.803212851	0.803212851	0.803212851	0.803212851	1.132919413	0.803212851	0.803212851	0.803212851	0.803212851	0.803212851	1.304465984	0.803212851	0.803212851	0.803212851	0.803212851	1.132919413	0.803212851	0.803212851
Pomalidomide	0	0	0	0.564971751	2.166402998	1.287001287	0	0	0	0.630119723	0	0.362318841	0	0	0	0	0	1.351438524	1.078748652	0	0.248941997	1.663353773	19.77482907	0	0	0	0	0	2.243895165	1.304713805	1.310164115	0	0	0.775485786	0	0	0	0	0	0	0	0	0	0	0	0	0	0	0
Ponatinib	0.329706561	0.659413122	0	0	1.230016095	2.29813452	0	0	0	0	0	0	0	0	0.729904808	0	0	0	1.17573025	0	0	0	9.785472799	0.718390805	0	0.694658965	0.713775874	0	0.329706561	0	0.803212851	0.803212851	0.803212851	0.803212851	0.803212851	1.132919413	0.803212851	0.803212851	0.803212851	0.803212851	0.803212851	1.304465984	0.803212851	0.803212851	0.803212851	0.803212851	1.132919413	0.803212851	0.803212851
Ramucirumab_(Cyramza)	0.329706561	0.659413122	0	0	1.230016095	2.29813452	0	0	0	0	0	0	0	0	0.729904808	0	0	0	1.17573025	0	0	0	9.785472799	0.718390805	0	0.694658965	0.713775874	0	0.329706561	0.3066544	0.803212851	0.803212851	0.803212851	0.803212851	0.803212851	1.132919413	0.803212851	0.803212851	0.803212851	0.803212851	0.803212851	1.304465984	0.803212851	0.803212851	0.803212851	0.803212851	1.132919413	0.803212851	0.803212851
Regorafenib	0	0	0	0	0	0.951022349	0	0	0	0	0	0	1.522614494	0	0	0	0	0	0	1.064962726	1.064962726	1.060220526	5.941450884	4.45480992	0	0	0	0	2.579777767	0	0	0	0	0	0	0	0	0	0	0	0	0	0	0	0	0	1.122334456	0	0
Ribociclib	0	0	0	0	3.912081903	6.662409007	0	0	0	0	0	0	0	0	0	0	0	0.155914071	0	0.311828142	1.10381916	0	13.32727716	0	0.155914071	0	0.155914071	0.155914071	0.994236535	1.266714838	1.310164115	0	0	0	0	0	0	0	0	0	0	0.155914071	0	0	0	0	0	0	0
Rigosertib	0.928505107	0.264131009	0	0	1.170825847	3.294070207	0	0.891265597	0.444444444	0	0	0	1.522614494	0	0	0	0.291120815	0.873074324	0	1.064962726	1.064962726	1.351341341	20.62586468	5.872434441	0.963489049	0.297619048	0.476190476	0.297619048	2.579777767	0.396825397	0.309214595	0	0	0	0	0	0	0	0	0	0	0	0	0	0	0	1.122334456	0	0
Rituximab	0	0	0	0	0.924641701	1.410792464	0	0	0	0	0	0	1.522614494	0	0	0	0	0	0	1.064962726	1.064962726	1.060220526	9.274049432	4.914580035	0	0	0	0	2.579777767	0	0	0	0	0	0	0	0	0	0	0	0	0	0	0	0	0	1.122334456	0	0
Romidepsin	0	0	0	0	0.924641701	1.410792464	0	0	0	0	0	0	1.522614494	0	0	0	0	0	0	1.064962726	1.064962726	1.060220526	9.274049432	4.914580035	0	0	0	0	2.579777767	0	0	0	0	0	0	0	0	0	0	0	0	0	0	0	0	0	1.122334456	0	0
Rucaparib	1.33844106	2.577193057	0.227531286	0	3.128825247	4.933388565	0	0	0.249875062	0	0	0	1.522614494	0	0	0	0	2.238498394	0	1.67718185	2.090662256	1.880703012	36.82058088	0.795544948	1.07885045	0	1.072186094	0.674763833	1.096491228	0	0.803212851	0.803212851	0.803212851	0.803212851	0.803212851	0.803212851	0.803212851	0.803212851	0.803212851	0.803212851	1.623695337	0.803212851	1.030744137	0.803212851	0.803212851	0.803212851	1.925547307	0.803212851	1.402733235
Ruxolitinib	9.860059122	4.276547316	4.41740876	0	15.42296085	30.9372944	0	1.798410761	0.383991535	0.29757356	1.097583945	0	2.280163375	0.217722621	4.119346234	0.623635797	1.201867628	9.608202758	0.595147119	3.653777033	7.018895865	7.550867832	125.2689706	8.811843497	7.333991765	1.728429231	6.629280041	6.96420122	4.394862451	8.627921744	2.016433322	0.803212851	0.803212851	0.803212851	0.803212851	4.079824606	1.21780655	0.803212851	0.803212851	0.803212851	1.848162229	1.833386672	1.810262197	0.803212851	2.554905511	1.214735485	4.413583306	2.729995125	2.026369032
Selumetinib	8.257172475	2.577193057	1.556535081	0	3.99733971	11.11035241	0	0	0.249875062	0	0	0	1.522614494	0.217722621	3.333333333	0	0	2.238498394	0	2.381903485	2.090662256	1.25170284	59.60998369	1.741223712	1.07885045	0.217722621	1.072186094	0.674763833	1.096491228	2.604166667	0.803212851	0.803212851	0.803212851	0.803212851	0.803212851	0.803212851	1.21780655	0.803212851	0.803212851	0.803212851	1.623695337	0.803212851	1.030744137	0.803212851	0.803212851	0.803212851	0.803212851	0.803212851	1.402733235
Siltuximab	9.860059122	4.276547316	4.41740876	0	15.42296085	30.71957178	0	1.798410761	0.383991535	0.29757356	1.097583945	0	2.280163375	0	4.119346234	0.623635797	1.201867628	9.608202758	0.595147119	3.653777033	7.018895865	7.550867832	124.8335254	8.811843497	7.333991765	1.51070661	6.629280041	6.96420122	4.394862451	8.627921744	2.016433322	0.803212851	0.803212851	0.803212851	0.803212851	4.079824606	1.21780655	0.803212851	0.803212851	0.803212851	1.848162229	1.833386672	1.810262197	0.803212851	2.554905511	1.214735485	4.413583306	2.729995125	2.026369032
Sonidegib_(LDE225)	3.786702122	1.529624893	0.236574403	1.269819517	3.324384446	10.96009591	0	0	0	0	0	0	0.645540332	0.243664717	0.542918656	0.623635797	0.532569551	2.330036818	3.563834686	0.612745098	2.601267867	2.705530637	26.91979905	0.798228363	3.415138864	0	1.596737573	1.51585485	1.951276976	3.466855799	0	0	0.886524823	0	0	0	0	0	0	0	0	0	0	0	0.923361034	0	0	0	0.623635797
Sorafenib	1.118871086	0	0	0	4.391873582	6.483487311	0	0	0.946969697	0	1.608504452	0	0	0.982318271	0	0.668002672	1.706135316	3.233020368	0	0	1.412309741	2.083302223	35.64443261	1.438812977	1.258634067	2.285833992	2.469179851	1.078748652	0.810066923	1.369577466	0	0	0	0	0	0	0	0	0	0	0	0	0	0	0	0	0	0	0.53013091
Sunitinib	1.118871086	0	0	0	4.391873582	6.483487311	0	0	0.946969697	0	1.608504452	0	0	0.982318271	0	0.668002672	1.706135316	3.233020368	0	0	1.412309741	2.083302223	35.64443261	1.438812977	1.258634067	2.285833992	2.469179851	1.078748652	0.810066923	1.369577466	0	0	0	0	0	0	0	0	0	0	0	0	0	0	0	0	0	0	0.53013091
Tamoxifen	7.536098513	0	2.775135393	0	3.482092881	9.037384114	0	0	0	0	0	0	1.522614494	0.217722621	3.333333333	0	0	0.937414313	0	1.368732259	1.688516323	1.673788374	51.75302541	5.752390666	2.226297381	1.090054313	0	5.231927299	2.100653637	2.604166667	0	0	0	0	0	0	0.414593698	0	0	0	0	0	0	0	0	0	0.769822941	0	0.535045479
Tecemotide_(Emepepimut-S_L-BLP25)	7.536098513	0	1.329003795	0	2.600258666	7.127986198	0	0	0	0	0	0	1.522614494	0.217722621	3.333333333	0	0	0	0	1.368732259	0.469010913	0.431220354	39.70401055	5.752390666	2.226297381	0.792435265	0	0	2.100653637	2.604166667	0	0	0	0	0	0	0.414593698	0	0	0	0	0	0	0	0	0	0.769822941	0	0
Temozolomide	0.577700751	0.577700751	0	0.564971751	1.264349873	3.745905864	0	0	0	0	0.643500644	0	0	0	0	0	0.861326443	0	0	0.591016548	0.248941997	0.861326443	17.82367027	1.841620626	2.037383603	0	0.443852641	0	1.732228536	1.586146308	1.310164115	0	0	0	0	0	0	0	0	0	0	0.577700751	0	0	0	0	0.769822941	0	0
Temsirolimus	11.6372918	2.577193057	1.556535081	0	5.770073871	15.17187937	0	1.182033097	0.249875062	0	0.291885581	0	1.522614494	0.217722621	3.333333333	0	0	1.581036198	0	3.446866211	3.732326251	2.311923366	82.65420194	7.067956415	2.226297381	1.750289671	1.462506157	0.78974601	3.197144865	2.604166667	0.803212851	0.803212851	0.803212851	0.803212851	0.803212851	0.964711559	2.98186936	0.803212851	0.803212851	0.803212851	1.623695337	4.008341057	1.030744137	0.803212851	0.803212851	0.803212851	2.695370248	0.803212851	2.5334601
Thalidomide	8.874539573	2.577193057	1.329003795	0	4.804442212	11.700553	0	1.182033097	0.249875062	0	0	0	1.522614494	0.217722621	3.333333333	0	0	1.581036198	0	3.446866211	2.921624748	2.311923366	63.72384396	6.547935615	2.226297381	0.792435265	1.072186094	0.674763833	3.197144865	2.604166667	0.803212851	0.803212851	0.803212851	0.803212851	0.803212851	0.803212851	1.21780655	0.803212851	0.803212851	0.803212851	1.623695337	0.803212851	0.803212851	0.803212851	0.803212851	0.803212851	2.695370248	0.803212851	1.402733235
Tivantinib	8.874539573	2.577193057	1.329003795	0	4.804442212	11.700553	0	1.182033097	0.249875062	0	0	0	1.522614494	0.217722621	3.333333333	0	0	1.581036198	0	3.446866211	2.921624748	2.311923366	63.72384396	6.547935615	2.226297381	0.792435265	1.072186094	0.674763833	3.197144865	2.604166667	0.803212851	0.803212851	0.803212851	0.803212851	0.803212851	0.803212851	1.21780655	0.803212851	0.803212851	0.803212851	1.623695337	0.803212851	0.803212851	0.803212851	0.803212851	0.803212851	2.695370248	0.803212851	1.402733235
Tivozanib	8.874539573	2.577193057	1.329003795	0	4.804442212	11.700553	0	1.182033097	0.249875062	0	0	0	1.522614494	0.217722621	3.333333333	0	0	1.581036198	0	3.446866211	2.921624748	2.311923366	63.72384396	6.547935615	2.226297381	0.792435265	1.072186094	0.674763833	3.197144865	2.604166667	0.803212851	0.803212851	0.803212851	0.803212851	0.803212851	0.803212851	1.21780655	0.803212851	0.803212851	0.803212851	1.623695337	0.803212851	0.803212851	0.803212851	0.803212851	0.803212851	2.695370248	0.803212851	1.402733235
Toremifene	8.874539573	2.577193057	1.329003795	0	4.804442212	11.700553	0	1.182033097	0.249875062	0	0	0	1.522614494	0.217722621	3.333333333	0	0	1.581036198	0	3.446866211	2.921624748	2.311923366	61.45535989	2.888670643	2.226297381	0.792435265	1.072186094	0.674763833	3.197144865	2.604166667	0.803212851	0.803212851	0.803212851	0.803212851	0.803212851	0.803212851	1.21780655	0.803212851	0.803212851	0.803212851	1.623695337	0.803212851	0.803212851	0.803212851	0.803212851	0.803212851	2.695370248	0.803212851	1.402733235
Trametinib_(Mekinst)	0.617367098	0	1.446131598	0	2.613578419	3.338160279	0	0	0	0	0.643500644	0	2.148584533	0	0	0	0	0.937414313	0	0	1.688516323	1.24256802	25.89122585	1.607217046	1.147446931	0.872331691	0	5.231927299	2.100653637	0	0	0	0	0	0	0	0	0	0	0	0	0	0	0	0	0	0	0	0.535045479
Trastuzumab	0.617367098	0	0	0	0.807102502	0.968992248	0	0	0	0	0.643500644	0	0.625970039	0	0	0	0	0	0	0	0	0	9.571590612	1.147446931	1.147446931	0.574712644	0	0	2.100653637	0	0	0	0	0	0	0	0	0	0	0	0	0	0	0	0	0	0	0	0
Trebananib	0.617367098	0	0	0	0.807102502	0.968992248	0	0	0	0	0.643500644	0	0.625970039	0	0	0	0	0	0	0	0	0	9.571590612	1.147446931	1.147446931	0.574712644	0	0	2.100653637	0	0	0	0	0	0	0	0	0	0	0	0	0	0	0	0	0	0	0	0
Vandetanib	0.617367098	0	0	0	1.731744203	1.428762363	0	0	0	0	0.643500644	0	2.148584533	0	0	0	0	0	0	0	0.469010913	0	13.84221098	1.607217046	1.147446931	0.574712644	0	0	2.100653637	0	0	0	0	0	0	0	0	0	0	0	0	0	0	0	0	0	0	0	0
Veliparib	0.617367098	0	0	0	1.731744203	1.428762363	0	0	0	0	0.643500644	0	2.148584533	0	0	0	0	0	0	0	0.469010913	0	13.84221098	1.607217046	1.147446931	0.574712644	0	0	2.100653637	0	0	0	0	0	0	0	0	0	0	0	0	0	0	0	0	0	0	0	0
Vemurafenib	0.617367098	0	0	0	1.731744203	1.428762363	0	0	0	0	0.643500644	0	2.148584533	0	0	0	0	0	0	0	0.469010913	0	13.84221098	1.607217046	1.147446931	0.574712644	0	0	2.100653637	0	0	0	0	0	0	0	0	0	0	0	0	0	0	0	0	0	0	0	0
Venetoclax	0.617367098	0	0	0	0.924641701	0.459770115	0	0	0	0	0	0	1.522614494	0	0	0	0	0	0	0	0.469010913	0	5.461710936	1.607217046	1.147446931	0.574712644	0	0	0.617367098	0	0	0	0	0	0	0	0	0	0	0	0	0	0	0	0	0	0	0	0
Vinblastine	0	0	0	0	5.823530117	10.18420746	0	0	0	0	0.913242009	0	0	0	0	0	0.983284169	1.007366732	1.38398697	1.28364544	1.10381916	0.886524823	36.00220571	1.29954481	0.613161442	0.913242009	1.143540502	1.762102166	4.216875607	1.932050832	1.959936695	0	0	0	0	0	0	0	0	0	0	0.155914071	0	0	0.863557858	0	0	0	0
Vincristine	0.796787753	7.291788268	0	0	5.959974379	17.09816841	2.083368076	0	0	6.250104229	7.163346239	7.291788268	0	0	0	0.658761528	0.983284169	1.007366732	1.38398697	13.7838539	8.395607427	8.17831309	57.59842011	7.54964904	8.413079791	7.163346239	8.43532877	9.888266738	10.46697984	1.932050832	1.959936695	0	0	13.5418925	6.250104229	0	2.083368076	0	0	0	0	0.155914071	4.166736153	0	12.32208228	4.166736153	0	7.291788268	0
Vindesine	0	0	0	0	0.613161442	1.88204337	0	0	0	0	0	0	0	0	0	0	0	0.155914071	0	0.311828142	0.524109015	0	12.25802636	0.718390805	0.613161442	0	0.599766712	1.315879262	1.483286539	0.665335995	0	0	0	0	0	0	0	0	0	0	0	0.155914071	0	0	0	0	0	0	0
Vinorelbine	28.72844464	24.96061416	7.996626288	4.464849435	53.582445	86.61496132	0.597371565	2.749770563	2.55474561	2.273046226	6.140771044	1.622885323	1.910364902	1.821871902	3.061611944	4.760857041	10.15998324	28.71474158	16.84392061	18.09564153	21.42595272	21.61035716	365.5338096	29.44877762	38.89921287	7.60127783	20.76662546	30.57235762	17.98865413	16.58615933	1.061170326	1.54012654	0.886524823	0.451991984	0	1.166866916	9.045469329	1.969449819	1.541236945	1.772360506	0.41956933	1.738729768	0	3.584840283	4.272599224	1.008233432	2.906842661	1.926782274	0.623635797
Vismodegib	29.47356603	30.83060697	4.649913008	5.077398255	56.11085132	95.60932111	0.597371565	4.085775907	2.726566916	2.273046226	6.206921735	1.622885323	2.667913782	1.821871902	4.098118551	3.001755171	10.42016423	27.47324813	16.44961218	22.18939771	24.57303182	23.82012159	394.2028176	28.3505799	42.65041121	6.936699651	23.27759595	31.76373623	17.79398445	21.13526903	1.061170326	5.270057888	0.886524823	0.451991984	0.740064632	1.166866916	9.045469329	0.319284802	0.985726553	1.772360506	0.41956933	2.318439913	1.104469192	4.031667808	6.87676589	1.008233432	2.906842661	2.480143806	0.623635797
Vorinostat	38.17413226	39.31625063	11.78272056	6.05756504	81.98756571	155.082541	1.453147626	5.472320596	4.422772956	3.291426279	7.107214574	1.944325375	3.614883479	1.919011395	6.036547167	5.234670295	12.12188269	53.73666954	19.40458045	31.74545697	35.91750331	42.18548499	571.6484766	41.87344919	54.5480291	13.94542299	33.83648083	41.54562975	27.83565717	31.92924021	1.818217863	2.439543083	1.345661645	0.852406531	1.198401248	1.567281462	11.73259911	0.881398349	2.213270959	3.471091513	1.676732774	3.076818599	0	5.524255752	7.920153113	2.673216065	3.156343659	3.119538882	1.158681276
[truncated: 3,751 more columns]
