# Supplementary material for: Pathway Based Analysis of Mutation Data Is Efficient for Scoring Target Cancer Drugs
Source: Front Pharmacol. 2019 Jan 23;10:1. doi: 10.3389/fphar.2019.00001 (PMC6351482; doi:10.3389/fphar.2019.00001)
Supplement: Supplementary Data Sheet 3 — Mutation drug scores for 3800 TCGA tumor samples for 10 versions of drug scoring algorithm. The dataset contains 10 tables that match the 10 methods of drug scoring. [file Data_Sheet_3.ZIP › MDS_gene_b.csv]

	TCGA.AG.3881.01	TCGA.63.6202.01	TCGA.MH.A561.01	TCGA.DZ.6135.01	TCGA.BR.8368.01	TCGA.HU.A4GQ.01	TCGA.36.1571.01	TCGA.19.5953.01	TCGA.41.2573.01	TCGA.CZ.4865.01	TCGA.A4.A57E.01	TCGA.02.0114.01	TCGA.81.5911.01	TCGA.27.2526.01	TCGA.BP.4351.01	TCGA.B8.5159.01	TCGA.IN.8663.01	TCGA.AH.6644.01	TCGA.CM.5344.01	TCGA.AA.3685.01	TCGA.EI.6508.01	TCGA.AA.3697.01	TCGA.AA.3977.01	TCGA.AG.A02X.01	TCGA.DC.4745.01	TCGA.AA.3494.01	TCGA.85.6560.01	TCGA.A6.6782.01	TCGA.D5.6533.01	TCGA.G4.6293.01	TCGA.HT.7873.01	TCGA.DU.7294.01	TCGA.DB.A64R.01	TCGA.FG.6690.01	TCGA.DU.6542.01	TCGA.HT.8109.01	TCGA.DU.A5TW.01	TCGA.HT.7877.01	TCGA.HW.8322.01	TCGA.HT.7695.01	TCGA.DU.6393.01	TCGA.QH.A65Z.01	TCGA.HT.8106.01	TCGA.DB.A64P.01	TCGA.DB.A64X.01	TCGA.DU.5851.01	TCGA.06.6701.01	TCGA.HT.7879.01	TCGA.FG.7634.01
Abemaciclib_(LY2835219)	0.929799506	0.489182554	0.226449275	0.255232261	4.60460551	6.371377357	0	0	0.175360329	0	0.579472786	0	0.124937531	0	1.913460642	0.32470013	0.046182523	1.230369439	0	0.350140056	3.791077311	3.652684038	25.51280155	0.729327281	1.511908381	0.765626477	0.340831629	0.824748734	1.02235473	1.717695224	0.12946409	0	0	0	0	0.12946409	0	1.823770622	0.277755196	0.746293972	0	0.866670839	0	0.746293972	0.542336466	0	0	0	0.426935411
Afatinib	0	0	0	0	0	0	0	0	0	0	0	0	0	0	0	0	0	0	0	0	0	0	2.242895195	0	0	0	0.488758553	0	0	1.371033384	0	0	0	0	0	0.478927203	0	0	0	0	0	0	0	0	0	0	0	0	0
Aflibercept	0	0.651589196	0	0	1.234977682	0.395520811	0	0	0	0	0	0	0	0	0	0	0	0	0.360750361	0	0.273000273	0.747190012	3.392691154	0	0.892080675	0	0	0.737140093	0	0	0	0	0	0	0	0	0	0	0	0	0	0.164122764	0	0	0	0	0	0	0
Alectinib	0.239463602	0.831820819	0.879181425	0	3.465322109	9.832050921	0	0	0	0.809061489	0	0.628930818	0	0	2.318977402	0	0	1.611144604	0	0	3.59050806	0.738366386	35.72029953	1.266325607	0.932846737	2.477966426	0.390320062	1.529051988	0.654258862	2.102945113	0	0	0	0	0	0	0	0	0	0	0	0	0	0	1.055798387	0	0	0	0
Alemtuzumab	1.195067849	0.577700751	0	0.564971751	1.264349873	4.714898112	0	0	0	0	0.643500644	0	0.625970039	0	0	0	0.861326443	0	0	0.591016548	0.248941997	0.861326443	21.57244569	2.989067557	3.184830533	0.574712644	0.443852641	0	2.349595633	1.586146308	1.310164115	0	0	0	0	0	0	0	0	0	0	0.577700751	0	0	0	0	0.769822941	0	0
Alitretinoin	0.054951094	0.109902187	0	0.094161959	0.361067166	0.214500215	0	0	0	0	0	0.060386473	0	0	0.121650801	0	0	0.225239754	0.234742535	0	0.041490333	0.129471492	3.35846344	0	0.059930481	0.115776494	0	0	0.461977799	0.105218855	0.218360686	0	0	0.129247631	0	0.054951094	0	0	0	0	0	0	0	0	0	0	0.054951094	0	0
Apalutamide_ARN-509	0	0	0	0.564971751	2.166402998	1.287001287	0	0	0	0.630119723	0	0.362318841	0	0	0	0	0	1.351438524	1.078748652	0	0.248941997	1.663353773	19.77482907	0	0	0	0	0	2.243895165	1.304713805	1.310164115	0	0	0.775485786	0	0	0	0	0	0	0	0	0	0	0	0	0	0	0
Arsenic_trioxide	0	0	0.114665749	0	0.533909234	0.57194647	0	0	0.232450023	0	0	0	0	0	0	0	0	0	0.188323917	0	0.529100529	0.282725881	3.885661687	0.334025628	0.245821042	0.781564327	0.400368022	0.384191044	0	0	0	0	0.245821042	0	0	0	0	0.112688754	0	0	0	0	0	0	0	0	0	0	0
Atezolizumab	0	0	0.343997248	0	1.601727702	1.71583941	0	0	0.69735007	0	0	0	0	0	0	0	0	0	0.564971751	0	1.587301587	0.848177642	10.49162942	1.002076885	0.737463127	2.344692981	1.201104067	1.152573131	0	0	0	0	0.737463127	0	0	0	0	0.338066261	0	0	0	0	0	0	0	0	0	0	0
Avelumab	0	0	0	0	0	0	0	0	0	1.075268817	0	0	0	0	0	0	0	0.583771162	0	0.738685796	0	0	2.070377886	0	0	0	1.387194227	0	0	0	0	0	0	0.430663221	0	0	0	0	0	0	0	0	0	0	0	0	0	0	0
Axitinib	0.109902187	0.219804374	0	0	0	0	0	0	0	0	0	0	0	0	0.243301603	0	0	0	0.109902187	0	0	0	2.268599152	0	0.119860961	0.231552988	0	0	0.604331033	0	0.436721372	0	0	0	0	0.109902187	0	0	0	0	0	0	0	0	0	0	0.109902187	0	0
Belinostat	0.264515889	0.119195913	0.090691765	0.021506764	0.350147306	0.944527096	0	0	0	0.101347927	0	0	0.08795387	0	0	0.097751711	0.626682839	0.122122147	0.016033373	0.288116791	0.432319378	0.492475639	3.356549787	0.142877881	0.167153462	0.139204814	0	0.233566938	0.273406491	0.167142379	0	0	0	0	0	0	0	0.181579657	0	0.135689813	0	0.157576516	0	0.135689813	0.067398566	0	0	0	0
Bevacizumab	37.4091119	46.77906678	9.699879234	3.381570271	76.44333622	139.6744178	2.083368076	6.354794291	2.110301165	9.327013685	14.11380819	9.549156392	3.614883479	3.884527588	4.630011148	3.430906534	9.410625171	40.90702636	15.6101126	34.27232792	41.82476432	38.53188968	545.4733784	42.7742397	48.88871805	20.25792454	40.89247033	52.94808273	30.3124116	27.14292287	1.009243715	5.319225894	0.886524823	14.39429903	6.250104229	5.261655938	9.393165746	2.878774577	1.127657723	5.829217283	2.356424955	1.579341613	5.66653207	5.400112964	19.97536946	6.063858474	6.933438341	9.64406933	1.224236397
Bexarotene	0.192566917	0.192566917	0.212992545	0.188323917	2.004911704	2.739129744	0	0	0	0	0.214500215	0	0	0	0	0	0.713776573	0.461351891	0.511244134	0.30094823	0.920812416	0.287108814	14.01453102	0.853337144	0.892597933	0	0.397537064	0.438626421	1.86974671	0.528715436	0.653312232	0	0	0	0	0	0	0	0.221778665	0	0	0.244538274	0	0	0.287852619	0.322997416	0.256607647	0.208193546	0
Bicalutamide	3.231445425	0.343112998	0.227531286	0	5.149876743	5.694847182	0	0.260213375	0.225988701	0.513081779	0.807083932	0.502765209	0	1.419904479	3.333333333	0	0.224774293	1.512948812	0.500487409	0.704721635	1.432808946	2.010079654	45.61206522	1.559754938	0.586924887	1.166753194	0.52272931	0.616270009	0.337537453	3.752231992	0.132409248	0	0	0	0.513081779	0.161498708	1.764062811	0	0	0	0	3.205128205	0.227531286	0	0	0	0	0	1.130726865
Binimetinib_(MEK162)	0.188164077	0.171556499	0	0	1.657865311	1.111760408	0	0.130106687	0	0.256540889	0.257599176	0.251382604	0	0.70995224	0	0	0.066204624	0.710291883	0.250243705	0	0.264871199	0.667657911	7.70334456	0.473684546	0.247279921	0.104449394	0.066204624	0.204461393	0.168768726	0.236650747	0.066204624	0	0	0	0.256540889	0	0	0	0	0	0	0	0	0	0	0	0	0	0.159412672
Blinatumomab	0.188164077	0.171556499	0	0	1.657865311	1.111760408	0	0.130106687	0	0.256540889	0.257599176	0.251382604	0	0.70995224	0	0	0.066204624	0.710291883	0.250243705	0	0.264871199	0.667657911	7.70334456	0.473684546	0.247279921	0.104449394	0.066204624	0.204461393	0.168768726	0.236650747	0.066204624	0	0	0	0.256540889	0	0	0	0	0	0	0	0	0	0	0	0	0	0.159412672
Bortezomib	0.02213695	0.020183118	0	0	0.195042978	0.130795342	0	0.015306669	0	0.030181281	0.030305785	0.029574424	0	0.083523793	0	0	0.007788779	0.083563751	0.029440436	0	0.031161318	0.078547989	0.906275831	0.055727594	0.029091755	0.012288164	0.007788779	0.024054282	0.019855144	0.027841264	0.007788779	0	0	0	0.030181281	0	0	0	0	0	0	0	0	0	0	0	0	0	0.018754432
Bosutinib	0.37379981	0.08577825	0	0	1.784057589	2.142556983	0	0.065053344	0.236742424	0.128270445	0.530925701	0.125691302	0	0.600555688	0	0.167000668	0.459636141	1.163401034	0.125121852	0	0.485513035	0.854654511	12.76278043	0.596545517	0.438298477	0.623683195	0.650397275	0.371917859	0.286901094	0.46071974	0.033102312	0	0	0	0.128270445	0	0	0	0	0	0	0	0	0	0	0	0	0	0.212239063
Brentuximab_vedotin	1.620156662	0.343112998	0.227531286	0	5.815132171	4.428785826	0	0.260213375	0	0.513081779	0.515198351	0.680627005	0	1.419904479	0	0	0.33272976	2.627204251	0.912878359	0	1.4170798	2.607580452	24.86281692	4.079594779	0.494559842	1.653213979	1.204170244	0.408922786	1.849596121	0.473301493	0.132409248	0	0	0	0.513081779	0	0	0	0	0	0	0	0.227531286	0	0	0	0	0	0.318825344
Brigatinib	1.024382955	0.171556499	0	0	1.657865311	1.618346021	0	0.130106687	0	0.256540889	0.257599176	0.251382604	0	0.70995224	0	0	0.066204624	0.710291883	0.325454294	0	0.743926457	0.7428685	11.19224924	0.785794408	0.247279921	0.104449394	0.378314486	0.204461393	0.168768726	0.236650747	0.066204624	0	0	0	0.256540889	0	0	0	0	0	0	0	0	0	0	0	0	0	0.159412672
Cabazitaxel	0.018816408	0.01715565	0	0	0.165786531	0.111176041	0	0.013010669	0	0.025654089	0.025759918	0.02513826	0	0.070995224	0	0	0.006620462	0.071029188	0.02502437	0	0.02648712	0.066765791	0.770334456	0.047368455	0.024727992	0.010444939	0.006620462	0.020446139	0.016876873	0.023665075	0.006620462	0	0	0	0.025654089	0	0	0	0	0	0	0	0	0	0	0	0	0	0.015941267
Cabozantinib	0.125442718	0.114370999	0	0	1.105243541	0.741173605	0	0.086737792	0	0.17102726	0.171732784	0.167588403	0	0.473301493	0	0	0.044136416	0.473527922	0.166829136	0	0.176580799	0.445105274	5.13556304	0.315789697	0.164853281	0.069632929	0.044136416	0.136307595	0.112512484	0.157767164	0.044136416	0	0	0	0.17102726	0	0	0	0	0	0	0	0	0	0	0	0	0	0.106275115
Carfilzomib	0.125442718	0.114370999	0	0	1.105243541	0.741173605	0	0.086737792	0	0.17102726	0.171732784	0.167588403	0	0.473301493	0	0	0.044136416	0.473527922	0.166829136	0	0.176580799	0.445105274	5.13556304	0.315789697	0.164853281	0.069632929	0.044136416	0.136307595	0.112512484	0.157767164	0.044136416	0	0	0	0.17102726	0	0	0	0	0	0	0	0	0	0	0	0	0	0.106275115
Ceritinib_(Zykadia_LDK378)	0.376328155	0.343112998	0	0	3.315730622	2.223520815	0	0.260213375	0	0.513081779	0.515198351	0.502765209	0	1.419904479	0	0	0.132409248	1.420583767	0.500487409	0	0.529742398	1.335315821	15.40668912	0.947369091	0.494559842	0.208898788	0.132409248	0.408922786	0.337537453	0.473301493	0.132409248	0	0	0	0.513081779	0	0	0	0	0	0	0	0	0	0	0	0	0	0.318825344
Cetuximab	0.376328155	0.343112998	0	0	3.315730622	2.223520815	0	0.260213375	0	0.513081779	0.515198351	0.502765209	0	1.419904479	0	0	0.132409248	1.420583767	0.500487409	0	0.529742398	1.335315821	15.40668912	0.947369091	0.494559842	0.208898788	0.132409248	0.408922786	0.337537453	0.473301493	0.132409248	0	0	0	0.513081779	0	0	0	0	0	0	0	0	0	0	0	0	0	0.318825344
Cobimetinib	1.162815871	0.171556499	0	0	2.597613051	4.516400792	0	0.130106687	0	0.256540889	0.257599176	0.467832821	0	0.70995224	0	0	0.066204624	0.710291883	0.562855749	0.312612044	1.544734452	1.157148661	17.0772701	1.982703161	1.251457874	0.561070398	0.066204624	1.382053355	1.777129008	0.870008165	0.066204624	0	0	0	0.256540889	0	0	0	0.41356493	0	0.144425188	0	0	0	0	0	0	0	0.565363433
Crizotinib	0.094082039	0.08577825	0	0	0.828932655	0.555880204	0	0.065053344	0	0.128270445	0.128799588	0.125691302	0	0.35497612	0	0	0.033102312	0.355145942	0.125121852	0	0.132435599	0.333828955	3.85167228	0.236842273	0.12363996	0.052224697	0.033102312	0.102230696	0.084384363	0.118325373	0.033102312	0	0	0	0.128270445	0	0	0	0	0	0	0	0	0	0	0	0	0	0.079706336
CYT387_(Momelotinib)	0.188164077	0.171556499	0.113765643	0	1.657865311	2.387427308	0	0.130106687	0	0.256540889	0.257599176	0.251382604	0.440917108	0.70995224	0	0	0.066204624	1.039022981	0.250243705	0.332005312	0.6189505	1.384696171	13.91466063	0.87145702	1.262895622	0.104449394	0.307052408	0.204461393	0.168768726	0.714205665	0.066204624	0	0	0	0.256540889	0	0.237079184	0	0	0	0	0	0.113765643	0	0	0	0	0	0.159412672
Dabrafenib	1.56954019	0.171556499	0.113765643	0	2.574938372	2.847423591	0	0.130106687	0	0.256540889	0.403541966	0.251382604	0	0.70995224	0	0	0.066204624	0.710291883	0.250243705	0.352360817	0.67022195	0.667657911	22.37363169	0.733694946	0.247279921	0.583376597	0.261364655	0.261952482	0.168768726	1.53873408	0.066204624	0	0	0	0.256540889	0.080749354	0.882031405	0	0	0	0	1.602564103	0.113765643	0	0	0	0	0	0.565363433
Daratumumab	0.376328155	0.343112998	0	0	3.315730622	2.223520815	0	0.260213375	0	0.513081779	0.515198351	0.502765209	0	1.419904479	0	0	0.132409248	1.420583767	0.500487409	0	0.529742398	1.335315821	15.40668912	0.947369091	0.494559842	0.208898788	0.132409248	0.408922786	0.337537453	0.473301493	0.132409248	0	0	0	0.513081779	0	0	0	0	0	0	0	0	0	0	0	0	0	0.318825344
Dasatinib	0.041814239	0.038123666	0	0	0.368414514	0.247057868	0	0.028912597	0	0.057009087	0.057244261	0.055862801	0	0.157767164	0	0	0.014712139	0.157842641	0.055609712	0	0.058860266	0.148368425	1.711854347	0.105263232	0.054951094	0.023210976	0.014712139	0.045435865	0.037504161	0.052589055	0.014712139	0	0	0	0.057009087	0	0	0	0	0	0	0	0	0	0	0	0	0	0.035425038
Degarelix	0.376328155	0.343112998	0	0	4.421811253	2.223520815	0	0.260213375	0	0.513081779	1.116883069	0.502765209	0	1.419904479	0	0	0.132409248	1.420583767	0.500487409	1.038421599	0.529742398	1.817198218	17.06333315	1.646181111	0.494559842	0.208898788	0.132409248	0.408922786	0.337537453	0.473301493	0.132409248	0	0	0	0.513081779	0	0	0	0	0	0	0	0	0	0	0	0	0	0.318825344
Denileukin_diftitox_(Ontac)	0.188164077	0.171556499	0	0	1.657865311	1.111760408	0	0.130106687	0	0.256540889	0.257599176	0.251382604	0	0.70995224	0	0	0.066204624	0.710291883	0.250243705	0	0.264871199	0.667657911	7.70334456	0.473684546	0.247279921	0.104449394	0.066204624	0.204461393	0.168768726	0.236650747	0.066204624	0	0	0	0.256540889	0	0	0	0	0	0	0	0	0	0	0	0	0	0.159412672
Denosumab	1.495199241	0.343112998	0	0	7.136230355	8.570227932	0	0.260213375	0.946969697	0.513081779	2.123702803	0.502765209	0	2.40222275	0	0.668002672	1.838544563	4.653604135	0.500487409	0	1.942052139	3.418618044	51.05112173	2.386182068	1.753193908	2.49473278	2.601589098	1.487671437	1.147604375	1.842878959	0.132409248	0	0	0	0.513081779	0	0	0	0	0	0	0	0	0	0	0	0	0	0.848956254
Docetaxel	2.707014621	2.714429182	0.047314881	0.047314881	2.632345007	3.054697826	0.49500482	0.231666246	0.433833706	1.352637202	1.353060516	1.769108405	0.372657201	0.5538192	0.165016502	0.15831588	1.354569544	1.381016986	0.15476412	2.730535222	2.174767478	2.308484359	16.69603624	3.028256317	1.832333614	1.958174787	1.859733064	3.223306791	1.804715476	0.463213438	0.156690183	0	0	2.708378499	1.352637202	0	0.416673615	0.112422709	0.052164841	0	0	0	0.833347231	0.053633682	2.610340286	0.833347231	0.18183881	1.458357654	0.063765069
Dovitinib	0.02894832	0.026393308	0	0	0.255056202	0.171040063	0	0.020016413	0	0.039467829	0.039630642	0.038674247	0	0.109223421	0	0	0.010185327	0.109275674	0.038499031	0	0.040749415	0.102716602	1.185129932	0.072874545	0.038043065	0.016069138	0.010185327	0.031455599	0.025964419	0.036407807	0.010185327	0	0	0	0.039467829	0	0	0	0	0	0	0	0	0	0	0	0	0	0.024525026
Durvalumab	0.188164077	0.171556499	0	0	1.657865311	1.111760408	0	0.130106687	0	0.256540889	0.257599176	0.251382604	0	0.70995224	0	0	0.066204624	0.710291883	0.250243705	0	0.264871199	0.667657911	7.70334456	0.473684546	0.247279921	0.104449394	0.066204624	0.204461393	0.168768726	0.236650747	0.066204624	0	0	0	0.256540889	0	0	0	0	0	0	0	0	0	0	0	0	0	0.159412672
Elotuzumab	0.376328155	0.343112998	0	0	3.315730622	2.223520815	0	0.260213375	0	0.513081779	0.515198351	0.502765209	0	1.419904479	0	0	0.132409248	1.420583767	0.500487409	0	0.529742398	1.335315821	15.40668912	0.947369091	0.494559842	0.208898788	0.132409248	0.408922786	0.337537453	0.473301493	0.132409248	0	0	0	0.513081779	0	0	0	0	0	0	0	0	0	0	0	0	0	0.318825344
Enzalutamide	0.376328155	0.343112998	0	0	3.315730622	2.223520815	0	0.260213375	0	0.513081779	0.515198351	0.502765209	0	1.419904479	0	0	0.132409248	1.420583767	0.500487409	0	0.529742398	1.335315821	15.40668912	0.947369091	0.494559842	0.208898788	0.132409248	0.408922786	0.337537453	0.473301493	0.132409248	0	0	0	0.513081779	0	0	0	0	0	0	0	0	0	0	0	0	0	0.318825344
Erlotinib	0.188164077	0.171556499	0.113765643	0	1.657865311	1.345760642	0	0.130106687	0	0.256540889	0.257599176	0.251382604	0.440917108	0.70995224	0	0	0.066204624	0.710291883	0.250243705	0	0.6189505	1.384696171	9.900564113	0.87145702	0.723470397	0.104449394	0.307052408	0.204461393	0.168768726	0.714205665	0.066204624	0	0	0	0.256540889	0	0.237079184	0	0	0	0	0	0.113765643	0	0	0	0	0	0.159412672
Estramustine	0.125442718	0.114370999	0	0	1.105243541	0.741173605	0	0.086737792	0	0.17102726	0.171732784	0.167588403	0	0.473301493	0	0	0.044136416	0.473527922	0.166829136	0	0.176580799	0.445105274	5.13556304	0.315789697	0.164853281	0.069632929	0.044136416	0.136307595	0.112512484	0.157767164	0.044136416	0	0	0	0.17102726	0	0	0	0	0	0	0	0	0	0	0	0	0	0.106275115
Everolimus	0.188164077	0.171556499	0	0	1.657865311	1.111760408	0	0.130106687	0	0.256540889	0.257599176	0.251382604	0	0.70995224	0	0	0.066204624	0.710291883	0.250243705	0	0.264871199	0.667657911	7.70334456	0.473684546	0.247279921	0.104449394	0.066204624	0.204461393	0.168768726	0.236650747	0.066204624	0	0	0	0.256540889	0	0	0	0	0	0	0	0	0	0	0	0	0	0.159412672
Exemestane	0.376328155	0.343112998	0	0	3.315730622	2.223520815	0	0.260213375	0	0.513081779	0.515198351	0.502765209	0	1.419904479	0	0	0.132409248	1.420583767	0.500487409	0	0.529742398	1.335315821	15.40668912	0.947369091	0.494559842	0.208898788	0.132409248	0.408922786	0.337537453	0.473301493	0.132409248	0	0	0	0.513081779	0	0	0	0	0	0	0	0	0	0	0	0	0	0.318825344
Flavopiridol_(Alvociclib)	0.236619162	0.238805699	0.353430627	0	0.762860402	1.09827053	0	0.050766133	0.01490183	0.057009087	0.057244261	0.055862801	0.106025633	0.157767164	0	0	0.090765967	0.488409176	0.055609712	0	0.222194705	0.31277989	4.950207859	0.260044488	0.265345803	0.063730675	0.051467504	0.331881255	0.202170367	0.112401746	0.049069316	0.021853536	0	0	0.057009087	0	0.046065966	0.062457061	0	0	0	0.114463758	0	0	0.082409406	0	0.027722333	0	0.094874536
Foretinib	0.02894832	0.026393308	0	0	0.255056202	0.171040063	0	0.020016413	0	0.039467829	0.039630642	0.038674247	0	0.109223421	0	0	0.010185327	0.109275674	0.038499031	0	0.040749415	0.102716602	1.185129932	0.072874545	0.038043065	0.016069138	0.010185327	0.031455599	0.025964419	0.036407807	0.010185327	0	0	0	0.039467829	0	0	0	0	0	0	0	0	0	0	0	0	0	0.024525026
Fulvestrant	0.857384607	1.460153028	0	0	3.222277934	3.053026459	0	0.130106687	0.124937531	0.256540889	0.257599176	0.251382604	0.761307247	0.70995224	0	0	0.066204624	1.500809982	0.250243705	0.506585613	1.19320221	1.608009417	20.61059129	0.87145702	0.473421938	0.104449394	0.602297671	0.541843309	0.71701434	0.236650747	0.467811049	0.401606426	0.401606426	0.401606426	0.658147315	0.401606426	0.401606426	0.401606426	0.401606426	0.401606426	0.811847669	0.401606426	0.401606426	0.401606426	0.401606426	0.401606426	0.962773654	0.401606426	0.86077929
Ganetespib_(STA-9090)	1.714769214	2.920306056	0	0	6.444555869	6.106052918	0	0.260213375	0.249875062	0.513081779	0.515198351	0.502765209	0	1.419904479	0	0	0.132409248	3.001619965	0.500487409	1.013171226	2.38640442	2.155798307	41.22118257	1.742914039	0.946843876	0.208898788	1.204595342	1.083686618	1.434028681	0.473301493	0.935622099	0.803212851	0.803212851	0.803212851	1.31629463	0.803212851	0.803212851	0.803212851	0.803212851	0.803212851	1.623695337	0.803212851	0.803212851	0.803212851	0.803212851	0.803212851	0.803212851	0.803212851	1.721558579
Gefitinib	1.714769214	2.920306056	0	0	6.444555869	6.106052918	0	0.260213375	0.249875062	0.513081779	0.515198351	0.502765209	0	1.419904479	0	0	0.132409248	3.001619965	0.500487409	1.013171226	2.38640442	2.155798307	41.22118257	1.742914039	0.946843876	0.208898788	1.204595342	1.083686618	1.434028681	0.473301493	0.935622099	0.803212851	0.803212851	0.803212851	1.31629463	0.803212851	0.803212851	0.803212851	0.803212851	0.803212851	1.623695337	0.803212851	0.803212851	0.803212851	0.803212851	0.803212851	0.803212851	0.803212851	1.721558579
Goserelin	0.857384607	1.460153028	0	0	3.222277934	3.053026459	0	0.130106687	0.124937531	0.256540889	0.257599176	0.251382604	0	0.70995224	0	0	0.066204624	1.500809982	0.250243705	0.506585613	1.19320221	1.077899154	20.61059129	0.87145702	0.473421938	0.104449394	0.602297671	0.541843309	0.71701434	0.236650747	0.467811049	0.401606426	0.401606426	0.401606426	0.658147315	0.401606426	0.401606426	0.401606426	0.401606426	0.401606426	0.811847669	0.401606426	0.401606426	0.401606426	0.401606426	0.401606426	0.401606426	0.401606426	0.86077929
Homoharringtonine_(Omacetaxine_mepesuccinate)	0.4686932	0.343112998	0	0	3.315730622	2.223520815	0	0.260213375	0.225988701	0.513081779	0.515198351	0.502765209	0	1.419904479	3.333333333	0	0.224774293	1.512948812	0.500487409	0	0.622107443	2.010079654	16.27149095	1.039734137	0.586924887	0.208898788	0.132409248	0.501287831	0.337537453	1.148065326	0.132409248	0	0	0	0.513081779	0	0	0	0	0	0	0	0	0	0	0	0	0	0.318825344
Ibritumomab_tiuxetan	2.637742125	0.171556499	0.403551251	0	2.87881466	5.219940831	0	0.130106687	0	0.256540889	0.257599176	0.467832821	0	0.70995224	0	0.778816199	0.066204624	0.710291883	0.562855749	0.312612044	1.544734452	1.157148661	20.64075057	1.982703161	1.832177967	0.561070398	0.066204624	1.382053355	1.777129008	0.870008165	0.066204624	0	0	0	0.256540889	0	0	0	0.41356493	0.281201609	0.144425188	0	0	0	0	0	0	0	0.565363433
Ibrutinib	0.376328155	0.343112998	0	0	3.315730622	2.223520815	0	0.260213375	0	0.513081779	0.515198351	0.502765209	0	1.419904479	0	0	0.132409248	1.420583767	0.500487409	0	0.529742398	1.335315821	15.40668912	0.947369091	0.494559842	0.208898788	0.132409248	0.408922786	0.337537453	0.473301493	0.132409248	0	0	0	0.513081779	0	0	0	0	0	0	0	0	0	0	0	0	0	0.318825344
Idelalisib	0.094082039	0.08577825	0	0	0.828932655	0.555880204	0	0.065053344	0	0.128270445	0.128799588	0.125691302	0	0.35497612	0	0	0.033102312	0.355145942	0.125121852	0	0.132435599	0.333828955	3.85167228	0.236842273	0.12363996	0.052224697	0.033102312	0.102230696	0.084384363	0.118325373	0.033102312	0	0	0	0.128270445	0	0	0	0	0	0	0	0	0	0	0	0	0	0.079706336
Imatinib	0.037632815	0.0343113	0	0	0.331573062	0.222352082	0	0.026021337	0	0.051308178	0.051519835	0.050276521	0	0.141990448	0	0	0.013240925	0.142058377	0.050048741	0	0.05297424	0.133531582	1.540668912	0.094736909	0.049455984	0.020889879	0.013240925	0.040892279	0.033753745	0.047330149	0.013240925	0	0	0	0.051308178	0	0	0	0	0	0	0	0	0	0	0	0	0	0.031882534
Inotuzumab_ozogamicin	1.096491228	0	0	0	0	1.740116867	0	0	0	0	0	0	0	0	0	0.309501702	0	0.715307582	0	1.782144835	0	0	6.666277739	0	0.660066007	1.430615165	1.430615165	0	0	0	0	0	0	0	0	0	0	0	0	0	0	0	0	0	0	0	0	0	0
Ipilimumab	1.096491228	0	0	0	0.681663258	3.17765557	0	0	0	0	0	0	0	0	0	0.309501702	0	0.624008359	0.681663258	0.634920635	1.131485475	0	12.21826979	0	1.834659593	0	0	0	1.696634076	1.234467415	0	0	0	0	0	0	0	0	0	0	0	0	0	0	0	0	0	0	0
Ixabepilone	0.054824561	0	0	0	0	0.087005843	0	0	0	0	0	0	0	0	0	0.015475085	0	0.035765379	0	0.089107242	0	0	0.333313887	0	0.0330033	0.071530758	0.071530758	0	0	0	0	0	0	0	0	0	0	0	0	0	0	0	0	0	0	0	0	0	0
Ixazomib_(MLN9708)	5.477277847	4.354427641	0.526360022	0.423273172	5.474971276	9.864297433	0	0.656852627	0.496613266	0.057214784	0.15309041	0.196344854	0.573499301	0.356249075	0.620529705	0.343877511	0.697293243	3.5151195	1.24164693	3.195286861	4.307841445	2.477875081	33.00614782	3.839134512	2.531215276	0.487189022	1.104622348	2.377706944	1.804819645	1.667669975	0.301335292	0	0.295508274	0.057214784	0	0	0.78618962	0.187371182	0.185170131	0.220553529	0.043572985	0	0.368156397	0.148942508	1.466881305	0.296296296	0	0.184453844	0.207878599
Lapatinib	5.402532784	3.428117627	1.400806128	0.940063388	8.60991714	12.58746596	0	0.716168552	0.110156422	0.29415551	0.587050386	0.216450216	0.447707697	0	0	0.311817898	1.061186621	5.254520137	1.223656444	2.781966543	2.679869237	3.304737281	33.58746737	6.068043893	2.08729039	0.593994143	2.066573345	1.479304098	3.198487192	2.042976211	0	0	0.443262411	0.225995992	0	0	0.867174567	0.281056773	0	0.746293972	0	0	0	0.889478394	0.461680517	0.444444444	0	0.963391137	0.311817898
Lenalidomide	24.48817335	27.07438343	10.39459512	4.863573518	43.92117379	90.98784652	2.680739642	2.60416468	2.259532061	8.804835962	9.777718935	9.566294176	2.438115412	1.705808763	4.964917873	3.424202594	13.7741083	37.75367217	8.553702008	29.36748023	32.75551597	25.38039434	322.7287221	25.08539462	39.05566554	15.69228414	19.13077746	30.30656747	25.06981016	18.00786768	0.670355801	5.498351732	0.886524823	13.71353685	8.533209252	0.670690812	9.572346048	1.650165017	3.743853356	1.600627722	1.800936746	2.318439913	5.8102563	0.714995934	19.22665551	5.450207802	0.895186795	7.8451498	0.623635797
Lenvatinib	1.295598946	0.591082182	0.490379469	0.108345606	1.805200563	2.7361633	0	0.024106932	0.044444444	0.029757356	0.280320472	0.0456621	0.089541539	0.024366472	0.159489633	0.128239733	0.534536053	2.585894284	0.320796698	0.11846619	0.672032895	0.370742637	8.899512588	0.82074633	1.259152268	0.262475176	0.242734087	0.753869727	0.696285926	0.570943928	0	0	0	0	0.228310502	0	0.605842546	0	0.056211355	0.093896714	0.013071895	0	0	0	0.238906984	0	0	0	0.06236358
Letrozole	8.440209929	5.722726746	0	0.813993769	10.78412577	10.7233755	0	0	0	0	1.543600934	0	0	0	0	0	2.50423944	11.64218237	0.48054645	1.869996871	5.965556591	1.124288384	28.25902807	5.920089032	3.432705217	0.48054645	3.373825239	3.64071328	1.955233551	1.1441692	0	0	0	0	0	0	0.881834215	0	0.813993769	0	0	0	0	0	1.707171779	0	0.377517388	0	0
Leuprolide	8.440209929	5.722726746	0	0.813993769	10.78412577	10.7233755	0	0	0	0	1.543600934	0	0	0	0	0	2.50423944	11.64218237	0.48054645	1.869996871	5.965556591	1.124288384	28.25902807	5.920089032	3.432705217	0.48054645	3.373825239	3.64071328	1.955233551	1.1441692	0	0	0	0	0	0	0.881834215	0	0.813993769	0	0	0	0	0	1.707171779	0	0.377517388	0	0
Lomustine	8.440209929	5.722726746	0	0.813993769	10.78412577	10.7233755	0	0	0	0	1.543600934	0	0	0	0	0	2.50423944	11.64218237	0.48054645	1.869996871	5.965556591	1.124288384	28.25902807	5.920089032	3.432705217	0.48054645	3.373825239	3.64071328	1.955233551	1.1441692	0	0	0	0	0	0	0.881834215	0	0.813993769	0	0	0	0	0	1.707171779	0	0.377517388	0	0
Masitinib	0	0	0	0	0.063181489	0.035415781	0	0	0	0	0	0	0	0	0	0	0	0.028810141	0.037377588	0	0	0	0.383470863	0	0	0	0	0	0.028810141	0.082447028	0	0	0	0	0	0	0	0	0	0	0	0	0	0	0	0	0	0	0
Medroxyprogesterone_acetate_(MPA)	0.85909284	0.62431507	0.479198952	0	2.592118565	7.945438589	0	0	0.075329567	0	0.572925484	0	0.083291687	0	0.164529317	0.424345352	0	2.87015768	0	1.092816878	3.015813912	2.423466503	19.68430562	0.781375701	1.194158817	0.571100945	0.207878599	0.648585324	0.68156982	1.137665604	0.086309393	0	0	0	0	0.086309393	0	1.434537922	0.185170131	0.497529315	0	0.577780559	0	0.497529315	0.361557644	0	0	0	0.207878599
Megestrol	8.834873226	3.154893808	1.329003795	0.564971751	5.261689583	14.38825781	0	0	0.249875062	0	0.643500644	0	1.522614494	0.217722621	3.333333333	0	0.861326443	1.581036198	0	4.03788276	3.170566745	3.173249808	70.30402215	7.24210931	3.116234053	0.217722621	1.516038735	0.674763833	2.828719764	4.190312974	2.113376967	0.803212851	0.803212851	0.803212851	0.803212851	0.803212851	1.21780655	0.803212851	0.803212851	0.803212851	1.623695337	1.380913602	0.803212851	0.803212851	0.803212851	0.803212851	2.695370248	0.803212851	1.402733235
Methyltestosterone	0.577700751	0.577700751	0	0.564971751	3.057506037	6.97700355	0	0	0	0	0.643500644	0	0	0.217722621	0	0	0.861326443	0	0	1.255027173	0.717952909	1.292546796	28.66085989	3.096935689	3.116234053	0.217722621	0.443852641	0	1.732228536	1.586146308	1.310164115	0	0	0	0	0	0.414593698	0	0	0	0	0.577700751	0	0	0	0	0.769822941	0	0
Midostaurin	3.589881276	1.592562657	3.530025154	0	9.550413143	23.7005312	0	0.299490866	0	0	0.291885581	0.359582884	0	0.767773732	0	4.092799593	0	3.584999798	0.534658016	1.607566325	3.203881118	5.228170358	73.74045405	5.078081019	3.568883148	0.957854406	1.613722571	4.561445753	3.618640259	3.364082822	1.310164115	0	0	0	0	0.161498708	2.178656509	0.562113547	0	0	0.130718954	1.051971419	0.227531286	0.26816841	0.249500998	0.393081761	0.517669408	0	0.623635797
Mogamulizumab	3.589881276	1.592562657	3.530025154	0	9.844617321	23.7005312	0	0.299490866	0	0	0.291885581	0.359582884	0	0.767773732	0	4.092799593	0	3.584999798	0.828862194	1.607566325	4.065207561	5.228170358	74.60178049	5.078081019	3.568883148	1.844379229	1.613722571	4.561445753	3.618640259	3.364082822	1.310164115	0	0	0	0	0.161498708	2.178656509	0.562113547	0	0	0.130718954	1.051971419	0.227531286	0.26816841	0.249500998	0.393081761	0.517669408	0	0.623635797
Moxetumomab_pasudotox	0.577700751	0.577700751	0	0.564971751	1.264349873	3.745905864	0	0	0	0	0.643500644	0	0	0	0	0	0.861326443	0	0	0.591016548	0.248941997	0.861326443	17.82367027	1.841620626	2.037383603	0	0.443852641	0	1.732228536	1.586146308	1.310164115	0	0	0	0	0	0	0	0	0	0	0.577700751	0	0	0	0	0.769822941	0	0
Necitumumab	6.918731415	0	1.329003795	0	2.600258666	7.127986198	0	0	0	0	0	0	1.522614494	0.217722621	3.333333333	0	0	0	0	1.368732259	0.469010913	0.431220354	34.08673502	0.945678764	0.626566416	0.217722621	0	0	1.483286539	2.604166667	0	0	0	0	0	0	0.414593698	0	0	0	0	0	0	0	0	0	0.769822941	0	0
Nilotinib	5.234944071	0.394202251	0.77826754	0.282485876	2.089525883	8.180623737	0	0	0	0	0.467693112	0	0.761307247	0	1.666666667	0	0.430663221	0.077957036	0	1.135788475	1.316236786	0.646273398	37.55864108	2.118207373	1.756432391	0.478927203	0.495043387	0.71543072	0.866114268	2.095156487	0.655082058	0	0	0	0	0.080749354	1.089328254	0	0	0	0	1.969371514	0.113765643	0	0	0	0.38491147	0	0.832886172
Nilutamide	1.195067849	0.577700751	0	0.564971751	3.057506037	7.728273177	0	0	0	0	0.643500644	0	0.625970039	0	0	0	0.861326443	0	0	0.591016548	0.717952909	1.292546796	27.16439129	3.448837672	3.184830533	0.574712644	0.443852641	0	2.349595633	1.586146308	1.310164115	0	0	0	0	0	0.414593698	0	0	0	0	0.577700751	0	0	0	0	0.769822941	0	0
Nimotuzumab	0.577700751	0.577700751	0	0.564971751	3.057506037	6.759280929	0	0	0	0	0.643500644	0	0	0	0	0	0.861326443	0	0	0.591016548	0.717952909	1.292546796	23.41561587	2.301390741	2.037383603	0	0.443852641	0	1.732228536	1.586146308	1.310164115	0	0	0	0	0	0.414593698	0	0	0	0	0.577700751	0	0	0	0	0.769822941	0	0
Nintedanib_(BIBF_1120)	0.169732348	0.016207981	0	0	0.364910522	0.465818681	0	0	0.072843823	0	0	0	0	0	0	0	0.039027436	0	0	0.051488003	0.201619085	0.144606296	2.453939468	0.091576513	0.355257034	0	0.802931921	0.116497163	0.282878379	0.080929592	0	0	0	0	0	0	0.031891823	0	0	0	0	0	0	0	0	0.074537865	0.059217149	0	0.041157345
Niraparib	15.99708708	20.60794588	3.271341874	1.500437238	30.89307157	53.26231044	1.041684038	2.559134193	1.055150583	4.106093242	6.549201872	4.774578196	1.80744174	1.942263794	1.4065303	1.518680343	4.705312585	17.19328759	7.108199558	15.71095902	15.75892297	15.5046667	218.7008881	19.07762255	21.20024283	9.448667585	17.48238528	22.44383444	12.60054689	11.6488189	0.284071387	2.459405674	0.443262411	6.996942241	3.125052115	2.430620695	4.696582873	0.440699174	0.085866392	1.836969408	0.618823454	0.499815734	2.719500392	1.95376251	9.26548475	3.031929237	3.341968671	4.822034665	0.612118199
Nivolumab_(BMS-936558)	1.135000795	1.206273557	4.000047233	0.236574403	2.744315779	5.770887483	0.833333333	0	0.833656735	0	0	0	0.645540332	0	0	0	0	0.313283208	1.612285084	0	2.966550692	2.470727249	23.5880786	0.377500944	1.094685518	0.198886237	1.919384332	2.253240293	1.360967664	0	0	0	0	0.280347631	0	0	0.881834215	0	0	0	0	0	0	0	0	0	0	0	0
Obinutuzumab	0	0.925925926	0.236574403	0.236574403	1.301226505	1.03621485	0.833333333	0	0.833656735	0	0	0	0.645540332	0	0	0	0	0	1.612285084	0	2.087777588	1.159331149	9.326957518	0	0.236574403	0	1.291033775	1.930555556	0.816235886	0	0	0	0	0	0	0	0.881834215	0	0	0	0	0	0	0	0	0	0	0	0
Ofatumumab	2.322222576	2.076744436	0	0.564971751	7.510713481	14.78288853	0	0	0	0	0.643500644	0	0.625970039	0	0.729904808	1.400560224	0.861326443	0.916949079	0.329706561	0.90284469	1.821772069	2.169739779	55.24637518	4.167228476	5.51171055	1.269371609	0.599766712	1.315879262	3.67353873	2.852861145	1.310164115	0	0	0	0	0.329706561	0.414593698	0	0	0	0	0.733614822	0	0	0	0	1.099529502	0	0
Olaparib	0.762387205	1.038372218	0	0.282485876	3.48479397	6.551840448	0	0	0	0	0.321750322	0	0.31298502	0	0.364952404	0	0.430663221	0.458474539	0.164853281	0.451422345	0.910886034	1.084869889	25.81291758	2.083614238	2.755855275	0.634685804	0.299883356	0.657939631	1.836769365	1.426430573	0.655082058	0	0	0	0	0.164853281	0.207296849	0	0	0	0	0.366807411	0	0	0	0	0.549764751	0	0
Olaratumab	2.602361279	7.563675163	0.274961442	0	1.389341405	9.158651491	2.083368076	0	0	6.250104229	6.46255602	7.68772879	0	0.217722621	0	0.273672687	0.212451791	0.573880721	0.191293574	12.97996828	7.671227467	10.51045022	34.19436469	6.345081591	7.556548659	6.467826851	10.0276111	7.692835347	8.06594629	0.479759818	0	0	0	13.5418925	6.250104229	0	2.083368076	0	0	0	0	0	4.705787108	0	11.45852442	4.166736153	0	7.291788268	0
Osimertinib	0	0	0	0	0.807102502	0.472813239	0	0	0	0	0	0	0	0	0	0.668002672	0	0.797448166	0.32488629	0	0.443852641	0	6.803173244	0	2.146975831	0	1.151455119	1.344086022	0.443852641	0	0	0	0	0	0	0	0.472813239	0	0	0	0	0	0	0	0	0	0	0	0
Paclitaxel	0.101403392	0.131360041	0.004532927	0	0.158007379	0.217379844	0	0.023657586	0.063555998	0.008098477	0.008536502	0.01005458	0	0	0	0.027833445	0.010201062	0.081918049	0.030719885	0.027498316	0.06341134	0.164928017	1.761793205	0.088826122	0.109197797	0.030242235	0.108192792	0.170651673	0.100292182	0.043076204	0	0	0	0	0	0	0.019700552	0	0	0	0	0.020576132	0	0	0.017895546	0.024539426	0	0	0
Palbociclib	0	1.410474736	0	0	0.254065041	0.922427258	0	0	0	0	0	0	0	0.491159136	0	0	0	0.206270627	0	0.489563693	0.731730272	0	9.17412635	0.182548375	0.779767602	0	0	0	0.365096751	0	0	0	0	0	0	0	0.334672021	0	0	0	0	0	0	0	0	0	0	0	0
Panitumumab	0	2.820949472	0	0	0.508130081	1.844854515	0	0	0	0	0	0	0	0.982318271	0	0	0	0.412541254	0	0.979127386	1.463460543	0	18.3482527	0.365096751	1.559535204	0	0	0	0.730193501	0	0	0	0	0	0	0	0.669344043	0	0	0	0	0	0	0	0	0	0	0	0
Panobinostat	0	0.256449952	0	0	0.046193644	0.167714047	0	0	0	0	0	0	0	0.089301661	0	0	0	0.03750375	0	0.089011581	0.133041868	0	1.569747494	0.033190614	0.141775928	0	0	0	0.066381227	0	0	0	0	0	0	0	0.060849458	0	0	0	0	0	0	0	0	0	0	0	0
Pazopanib	0.289436162	0.890807879	0.546571924	0	1.078020134	1.17302232	0	0	0.228520126	0	0	0.046071424	0	0	0	0	0.092131933	0.36972609	0	0.312859443	0.505158775	0.127782449	5.945450876	0.666228882	0.904649065	0.380517504	0.602162694	0	0.315634499	0.066137566	0	0	0	0	0.380517504	0	0	0	0	0	0	0	0	0	0.075483092	0	0	0	0
Pembrolizumab	25.3658395	29.27165794	6.60130702	1.083456063	32.92259377	56.41363909	2.083368076	3.870797702	1.773925183	9.124571204	10.38036312	9.549156392	2.857334599	3.884527588	5.061926445	2.393049845	6.053151793	25.68513527	7.814783389	24.30727282	22.43977461	29.06098624	314.4296955	25.80830974	30.81789699	17.55433599	26.18810603	31.9906367	19.77559962	12.51421947	0	3.378684807	0	13.82224013	6.250104229	0.907938736	6.646345673	0	0	2.639743824	0.130718954	0.999631468	5.802504964	3.90752502	16.35786934	5.644571262	4.612647478	7.291788268	2.014125813
Perifosine	0.36626437	0.667291057	0	0	2.61678577	7.553027173	0	0.499639965	0	0	0.293944738	0	0.315656566	0	0.73675389	0	0.594671088	3.127287254	0.604981093	0	0.234321764	0.477047126	22.82436354	0.38243007	0.559125483	0.865324762	1.070063709	2.286105192	0.547896257	1.304582596	0.388704208	0	0	0	0	0	0	0	0	0.801832774	0	0	0	1.01010101	0.966183575	0	0.572737686	0	0
Pertuzumab	0.329706561	0.659413122	0	0	1.230016095	2.29813452	0	0	0	0	0	0	0	0	0.729904808	0	0	0	1.17573025	0	0	0	9.785472799	0.718390805	0	0.694658965	0.713775874	0	0.329706561	0	0.803212851	0.803212851	0.803212851	0.803212851	0.803212851	1.132919413	0.803212851	0.803212851	0.803212851	0.803212851	0.803212851	1.304465984	0.803212851	0.803212851	0.803212851	0.803212851	1.132919413	0.803212851	0.803212851
Pomalidomide	0	0	0	0.282485876	1.083201499	0.643500644	0	0	0	0.315059861	0	0.18115942	0	0	0	0	0	0.675719262	0.539374326	0	0.124470998	0.831676886	9.887414533	0	0	0	0	0	1.121947582	0.652356902	0.655082058	0	0	0.387742893	0	0	0	0	0	0	0	0	0	0	0	0	0	0	0
Ponatinib	0.164853281	0.329706561	0	0	0.615008048	1.14906726	0	0	0	0	0	0	0	0	0.364952404	0	0	0	0.587865125	0	0	0	4.892736399	0.359195402	0	0.347329483	0.356887937	0	0.164853281	0	0.401606426	0.401606426	0.401606426	0.401606426	0.401606426	0.566459706	0.401606426	0.401606426	0.401606426	0.401606426	0.401606426	0.652232992	0.401606426	0.401606426	0.401606426	0.401606426	0.566459706	0.401606426	0.401606426
Ramucirumab_(Cyramza)	0.329706561	0.659413122	0	0	1.230016095	2.29813452	0	0	0	0	0	0	0	0	0.729904808	0	0	0	1.17573025	0	0	0	9.785472799	0.718390805	0	0.694658965	0.713775874	0	0.329706561	0.3066544	0.803212851	0.803212851	0.803212851	0.803212851	0.803212851	1.132919413	0.803212851	0.803212851	0.803212851	0.803212851	0.803212851	1.304465984	0.803212851	0.803212851	0.803212851	0.803212851	1.132919413	0.803212851	0.803212851
Regorafenib	0	0	0	0	0	0.055942491	0	0	0	0	0	0	0.089565558	0	0	0	0	0	0	0.062644866	0.062644866	0.062365913	0.349497111	0.262047642	0	0	0	0	0.151751633	0	0	0	0	0	0	0	0	0	0	0	0	0	0	0	0	0	0.066019674	0	0
Ribociclib	0	0	0	0	1.956040951	3.331204503	0	0	0	0	0	0	0	0	0	0	0	0.077957036	0	0.155914071	0.55190958	0	6.663638582	0	0.077957036	0	0.077957036	0.077957036	0.497118268	0.633357419	0.655082058	0	0	0	0	0	0	0	0	0	0	0.077957036	0	0	0	0	0	0	0
Rigosertib	0.928505107	0.264131009	0	0	1.170825847	3.294070207	0	0.891265597	0.444444444	0	0	0	1.522614494	0	0	0	0.291120815	0.873074324	0	1.064962726	1.064962726	1.351341341	20.62586468	5.872434441	0.963489049	0.297619048	0.476190476	0.297619048	2.579777767	0.396825397	0.309214595	0	0	0	0	0	0	0	0	0	0	0	0	0	0	0	1.122334456	0	0
Rituximab	0	0	0	0	0.924641701	1.410792464	0	0	0	0	0	0	1.522614494	0	0	0	0	0	0	1.064962726	1.064962726	1.060220526	9.274049432	4.914580035	0	0	0	0	2.579777767	0	0	0	0	0	0	0	0	0	0	0	0	0	0	0	0	0	1.122334456	0	0
Romidepsin	0	0	0	0	0.09246417	0.141079246	0	0	0	0	0	0	0.152261449	0	0	0	0	0	0	0.106496273	0.106496273	0.106022053	0.927404943	0.491458003	0	0	0	0	0.257977777	0	0	0	0	0	0	0	0	0	0	0	0	0	0	0	0	0	0.112233446	0	0
Rucaparib	0.44614702	0.859064352	0.075843762	0	1.042941749	1.644462855	0	0	0.083291687	0	0	0	0.507538165	0	0	0	0	0.746166131	0	0.559060617	0.696887419	0.626901004	12.27352696	0.265181649	0.359616817	0	0.357395365	0.224921278	0.365497076	0	0.267737617	0.267737617	0.267737617	0.267737617	0.267737617	0.267737617	0.267737617	0.267737617	0.267737617	0.267737617	0.541231779	0.267737617	0.343581379	0.267737617	0.267737617	0.267737617	0.641849102	0.267737617	0.467577745
Ruxolitinib	4.930029561	2.138273658	2.20870438	0	7.711480427	15.4686472	0	0.899205381	0.191995767	0.14878678	0.548791973	0	1.140081687	0.108861311	2.059673117	0.311817898	0.600933814	4.804101379	0.29757356	1.826888516	3.509447933	3.775433916	62.63448532	4.405921749	3.666995883	0.864214616	3.314640021	3.48210061	2.197431226	4.313960872	1.008216661	0.401606426	0.401606426	0.401606426	0.401606426	2.039912303	0.608903275	0.401606426	0.401606426	0.401606426	0.924081114	0.916693336	0.905131098	0.401606426	1.277452756	0.607367743	2.206791653	1.364997563	1.013184516
Selumetinib	4.128586238	1.288596529	0.77826754	0	1.998669855	5.555176207	0	0	0.124937531	0	0	0	0.761307247	0.108861311	1.666666667	0	0	1.119249197	0	1.190951743	1.045331128	0.62585142	29.80499185	0.870611856	0.539425225	0.108861311	0.536093047	0.337381916	0.548245614	1.302083333	0.401606426	0.401606426	0.401606426	0.401606426	0.401606426	0.401606426	0.608903275	0.401606426	0.401606426	0.401606426	0.811847669	0.401606426	0.515372068	0.401606426	0.401606426	0.401606426	0.401606426	0.401606426	0.701366618
Siltuximab	9.860059122	4.276547316	4.41740876	0	15.42296085	30.71957178	0	1.798410761	0.383991535	0.29757356	1.097583945	0	2.280163375	0	4.119346234	0.623635797	1.201867628	9.608202758	0.595147119	3.653777033	7.018895865	7.550867832	124.8335254	8.811843497	7.333991765	1.51070661	6.629280041	6.96420122	4.394862451	8.627921744	2.016433322	0.803212851	0.803212851	0.803212851	0.803212851	4.079824606	1.21780655	0.803212851	0.803212851	0.803212851	1.848162229	1.833386672	1.810262197	0.803212851	2.554905511	1.214735485	4.413583306	2.729995125	2.026369032
Sonidegib_(LDE225)	3.786702122	1.529624893	0.236574403	1.269819517	3.324384446	10.96009591	0	0	0	0	0	0	0.645540332	0.243664717	0.542918656	0.623635797	0.532569551	2.330036818	3.563834686	0.612745098	2.601267867	2.705530637	26.91979905	0.798228363	3.415138864	0	1.596737573	1.51585485	1.951276976	3.466855799	0	0	0.886524823	0	0	0	0	0	0	0	0	0	0	0	0.923361034	0	0	0	0.623635797
Sorafenib	0.111887109	0	0	0	0.439187358	0.648348731	0	0	0.09469697	0	0.160850445	0	0	0.098231827	0	0.066800267	0.170613532	0.323302037	0	0	0.141230974	0.208330222	3.564443261	0.143881298	0.125863407	0.228583399	0.246917985	0.107874865	0.081006692	0.136957747	0	0	0	0	0	0	0	0	0	0	0	0	0	0	0	0	0	0	0.053013091
Sunitinib	0.139858886	0	0	0	0.548984198	0.810435914	0	0	0.118371212	0	0.201063056	0	0	0.122789784	0	0.083500334	0.213266914	0.404127546	0	0	0.176538718	0.260412778	4.455554077	0.179851622	0.157329258	0.285729249	0.308647481	0.134843581	0.101258365	0.171197183	0	0	0	0	0	0	0	0	0	0	0	0	0	0	0	0	0	0	0.066266364
Tamoxifen	3.768049257	0	1.387567697	0	1.741046441	4.518692057	0	0	0	0	0	0	0.761307247	0.108861311	1.666666667	0	0	0.468707157	0	0.68436613	0.844258162	0.836894187	25.87651271	2.876195333	1.11314869	0.545027156	0	2.615963649	1.050326818	1.302083333	0	0	0	0	0	0	0.207296849	0	0	0	0	0	0	0	0	0	0.38491147	0	0.267522739
Tecemotide_(Emepepimut-S_L-BLP25)	7.536098513	0	1.329003795	0	2.600258666	7.127986198	0	0	0	0	0	0	1.522614494	0.217722621	3.333333333	0	0	0	0	1.368732259	0.469010913	0.431220354	39.70401055	5.752390666	2.226297381	0.792435265	0	0	2.100653637	2.604166667	0	0	0	0	0	0	0.414593698	0	0	0	0	0	0	0	0	0	0.769822941	0	0
Temozolomide	0.577700751	0.577700751	0	0.564971751	1.264349873	3.745905864	0	0	0	0	0.643500644	0	0	0	0	0	0.861326443	0	0	0.591016548	0.248941997	0.861326443	17.82367027	1.841620626	2.037383603	0	0.443852641	0	1.732228536	1.586146308	1.310164115	0	0	0	0	0	0	0	0	0	0	0.577700751	0	0	0	0	0.769822941	0	0
Temsirolimus	5.818645899	1.288596529	0.77826754	0	2.885036935	7.585939686	0	0.591016548	0.124937531	0	0.14594279	0	0.761307247	0.108861311	1.666666667	0	0	0.790518099	0	1.723433106	1.866163126	1.155961683	41.32710097	3.533978208	1.11314869	0.875144836	0.731253078	0.394873005	1.598572432	1.302083333	0.401606426	0.401606426	0.401606426	0.401606426	0.401606426	0.48235578	1.49093468	0.401606426	0.401606426	0.401606426	0.811847669	2.004170528	0.515372068	0.401606426	0.401606426	0.401606426	1.347685124	0.401606426	1.26673005
Thalidomide	2.958179858	0.859064352	0.443001265	0	1.601480737	3.900184335	0	0.394011032	0.083291687	0	0	0	0.507538165	0.072574207	1.111111111	0	0	0.527012066	0	1.148955404	0.973874916	0.770641122	21.24128132	2.182645205	0.742099127	0.264145088	0.357395365	0.224921278	1.065714955	0.868055556	0.267737617	0.267737617	0.267737617	0.267737617	0.267737617	0.267737617	0.405935517	0.267737617	0.267737617	0.267737617	0.541231779	0.267737617	0.267737617	0.267737617	0.267737617	0.267737617	0.898456749	0.267737617	0.467577745
Tivantinib	1.774907915	0.515438611	0.265800759	0	0.960888442	2.340110601	0	0.236406619	0.049975012	0	0	0	0.304522899	0.043544524	0.666666667	0	0	0.31620724	0	0.689373242	0.58432495	0.462384673	12.74476879	1.309587123	0.445259476	0.158487053	0.214437219	0.134952767	0.639428973	0.520833333	0.16064257	0.16064257	0.16064257	0.16064257	0.16064257	0.16064257	0.24356131	0.16064257	0.16064257	0.16064257	0.324739067	0.16064257	0.16064257	0.16064257	0.16064257	0.16064257	0.53907405	0.16064257	0.280546647
Tivozanib	2.958179858	0.859064352	0.443001265	0	1.601480737	3.900184335	0	0.394011032	0.083291687	0	0	0	0.507538165	0.072574207	1.111111111	0	0	0.527012066	0	1.148955404	0.973874916	0.770641122	21.24128132	2.182645205	0.742099127	0.264145088	0.357395365	0.224921278	1.065714955	0.868055556	0.267737617	0.267737617	0.267737617	0.267737617	0.267737617	0.267737617	0.405935517	0.267737617	0.267737617	0.267737617	0.541231779	0.267737617	0.267737617	0.267737617	0.267737617	0.267737617	0.898456749	0.267737617	0.467577745
Toremifene	8.874539573	2.577193057	1.329003795	0	4.804442212	11.700553	0	1.182033097	0.249875062	0	0	0	1.522614494	0.217722621	3.333333333	0	0	1.581036198	0	3.446866211	2.921624748	2.311923366	61.45535989	2.888670643	2.226297381	0.792435265	1.072186094	0.674763833	3.197144865	2.604166667	0.803212851	0.803212851	0.803212851	0.803212851	0.803212851	0.803212851	1.21780655	0.803212851	0.803212851	0.803212851	1.623695337	0.803212851	0.803212851	0.803212851	0.803212851	0.803212851	2.695370248	0.803212851	1.402733235
Trametinib_(Mekinst)	0.308683549	0	0.723065799	0	1.306789209	1.66908014	0	0	0	0	0.321750322	0	1.074292267	0	0	0	0	0.468707157	0	0	0.844258162	0.62128401	12.94561292	0.803608523	0.573723465	0.436165846	0	2.615963649	1.050326818	0	0	0	0	0	0	0	0	0	0	0	0	0	0	0	0	0	0	0	0.267522739
Trastuzumab	0.617367098	0	0	0	0.807102502	0.968992248	0	0	0	0	0.643500644	0	0.625970039	0	0	0	0	0	0	0	0	0	9.571590612	1.147446931	1.147446931	0.574712644	0	0	2.100653637	0	0	0	0	0	0	0	0	0	0	0	0	0	0	0	0	0	0	0	0
Trebananib	0.308683549	0	0	0	0.403551251	0.484496124	0	0	0	0	0.321750322	0	0.31298502	0	0	0	0	0	0	0	0	0	4.785795306	0.573723465	0.573723465	0.287356322	0	0	1.050326818	0	0	0	0	0	0	0	0	0	0	0	0	0	0	0	0	0	0	0	0
Vandetanib	0.205789033	0	0	0	0.577248068	0.476254121	0	0	0	0	0.214500215	0	0.716194844	0	0	0	0	0	0	0	0.156336971	0	4.614070328	0.535739015	0.38248231	0.191570881	0	0	0.700217879	0	0	0	0	0	0	0	0	0	0	0	0	0	0	0	0	0	0	0	0
Veliparib	0.308683549	0	0	0	0.865872102	0.714381182	0	0	0	0	0.321750322	0	1.074292267	0	0	0	0	0	0	0	0.234505456	0	6.921105492	0.803608523	0.573723465	0.287356322	0	0	1.050326818	0	0	0	0	0	0	0	0	0	0	0	0	0	0	0	0	0	0	0	0
Vemurafenib	0.617367098	0	0	0	1.731744203	1.428762363	0	0	0	0	0.643500644	0	2.148584533	0	0	0	0	0	0	0	0.469010913	0	13.84221098	1.607217046	1.147446931	0.574712644	0	0	2.100653637	0	0	0	0	0	0	0	0	0	0	0	0	0	0	0	0	0	0	0	0
Venetoclax	0.617367098	0	0	0	0.924641701	0.459770115	0	0	0	0	0	0	1.522614494	0	0	0	0	0	0	0	0.469010913	0	5.461710936	1.607217046	1.147446931	0.574712644	0	0	0.617367098	0	0	0	0	0	0	0	0	0	0	0	0	0	0	0	0	0	0	0	0
Vinblastine	0	0	0	0	0.970588353	1.69736791	0	0	0	0	0.152207002	0	0	0	0	0	0.163880695	0.167894455	0.230664495	0.213940907	0.18396986	0.147754137	6.000367619	0.216590802	0.102193574	0.152207002	0.190590084	0.293683694	0.702812601	0.322008472	0.326656116	0	0	0	0	0	0	0	0	0	0	0.025985679	0	0	0.14392631	0	0	0	0
Vincristine	0.039839388	0.364589413	0	0	0.297998719	0.854908421	0.104168404	0	0	0.312505211	0.358167312	0.364589413	0	0	0	0.032938076	0.049164208	0.050368337	0.069199349	0.689192695	0.419780371	0.408915655	2.879921006	0.377482452	0.42065399	0.358167312	0.421766438	0.494413337	0.523348992	0.096602542	0.097996835	0	0	0.677094625	0.312505211	0	0.104168404	0	0	0	0	0.007795704	0.208336808	0	0.616104114	0.208336808	0	0.364589413	0
Vindesine	0	0	0	0	0.030658072	0.094102169	0	0	0	0	0	0	0	0	0	0	0	0.007795704	0	0.015591407	0.026205451	0	0.612901318	0.03591954	0.030658072	0	0.029988336	0.065793963	0.074164327	0.0332668	0	0	0	0	0	0	0	0	0	0	0	0.007795704	0	0	0	0	0	0	0
Vinorelbine	1.436422232	1.248030708	0.399831314	0.223242472	2.67912225	4.330748066	0.029868578	0.137488528	0.12773728	0.113652311	0.307038552	0.081144266	0.095518245	0.091093595	0.153080597	0.238042852	0.507999162	1.435737079	0.84219603	0.904782076	1.071297636	1.080517858	18.27669048	1.472438881	1.944960643	0.380063891	1.038331273	1.528617881	0.899432706	0.829307967	0.053058516	0.077006327	0.044326241	0.022599599	0	0.058343346	0.452273466	0.098472491	0.077061847	0.088618025	0.020978466	0.086936488	0	0.179242014	0.213629961	0.050411672	0.145342133	0.096339114	0.03118179
Vismodegib	29.47356603	30.83060697	4.649913008	5.077398255	56.11085132	95.60932111	0.597371565	4.085775907	2.726566916	2.273046226	6.206921735	1.622885323	2.667913782	1.821871902	4.098118551	3.001755171	10.42016423	27.47324813	16.44961218	22.18939771	24.57303182	23.82012159	394.2028176	28.3505799	42.65041121	6.936699651	23.27759595	31.76373623	17.79398445	21.13526903	1.061170326	5.270057888	0.886524823	0.451991984	0.740064632	1.166866916	9.045469329	0.319284802	0.985726553	1.772360506	0.41956933	2.318439913	1.104469192	4.031667808	6.87676589	1.008233432	2.906842661	2.480143806	0.623635797
Vorinostat	3.47037566	3.574204603	1.071156414	0.550687731	7.453415065	14.09841282	0.13210433	0.497483691	0.402070269	0.299220571	0.646110416	0.176756852	0.328625771	0.174455581	0.548777015	0.475879118	1.101989336	4.885151776	1.764052768	2.885950633	3.265227573	3.83504409	51.96804332	3.806677199	4.958911736	1.267765726	3.076043712	3.776875432	2.530514288	2.902658201	0.165292533	0.221776644	0.122332877	0.077491503	0.108945568	0.142480133	1.066599919	0.080127123	0.201206451	0.315553774	0.152430252	0.279710782	0	0.502205068	0.720013919	0.243019642	0.286940333	0.283594444	0.105334661
[truncated: 3,751 more columns]
