# Supplementary material for: Pathway Based Analysis of Mutation Data Is Efficient for Scoring Target Cancer Drugs
Source: Front Pharmacol. 2019 Jan 23;10:1. doi: 10.3389/fphar.2019.00001 (PMC6351482; doi:10.3389/fphar.2019.00001)
Supplement: Supplementary Data Sheet 3 — Mutation drug scores for 3800 TCGA tumor samples for 10 versions of drug scoring algorithm. The dataset contains 10 tables that match the 10 methods of drug scoring. [file Data_Sheet_3.ZIP › MDS_m.csv]

	TCGA.AG.3881.01	TCGA.63.6202.01	TCGA.MH.A561.01	TCGA.DZ.6135.01	TCGA.BR.8368.01	TCGA.HU.A4GQ.01	TCGA.36.1571.01	TCGA.19.5953.01	TCGA.41.2573.01	TCGA.CZ.4865.01	TCGA.A4.A57E.01	TCGA.02.0114.01	TCGA.81.5911.01	TCGA.27.2526.01	TCGA.BP.4351.01	TCGA.B8.5159.01	TCGA.IN.8663.01	TCGA.AH.6644.01	TCGA.CM.5344.01	TCGA.AA.3685.01	TCGA.EI.6508.01	TCGA.AA.3697.01	TCGA.AA.3977.01	TCGA.AG.A02X.01	TCGA.DC.4745.01	TCGA.AA.3494.01	TCGA.85.6560.01	TCGA.A6.6782.01	TCGA.D5.6533.01	TCGA.G4.6293.01	TCGA.HT.7873.01	TCGA.DU.7294.01	TCGA.DB.A64R.01	TCGA.FG.6690.01	TCGA.DU.6542.01	TCGA.HT.8109.01	TCGA.DU.A5TW.01	TCGA.HT.7877.01	TCGA.HW.8322.01	TCGA.HT.7695.01	TCGA.DU.6393.01	TCGA.QH.A65Z.01	TCGA.HT.8106.01	TCGA.DB.A64P.01	TCGA.DB.A64X.01	TCGA.DU.5851.01	TCGA.06.6701.01	TCGA.HT.7879.01	TCGA.FG.7634.01
Abemaciclib_(LY2835219)	3.862551087	4.315814895	0.812619057	0.227791471	4.155289879	8.112177819	0.567525058	0.244173329	0.387374319	2.287154639	1.792915243	1.858361729	0.700669816	0.218740515	0.44313295	0.297275243	3.100087122	3.545173234	0.466295858	4.153189661	3.478015866	3.027049054	31.70007735	5.130237465	3.716450533	2.119659791	2.951670761	4.21132033	2.813758027	1.52084957	0	0.205649148	0.029550827	3.197533388	1.465088532	0.10283434	0.852010683	0.018737118	0.119941735	0.194782649	0.069340952	0.142250455	1.072226886	0.03696915	3.511888388	0.985391194	0.030461807	1.844052707	0.145515019
Afatinib	6.504192168	5.31237042	1.05682677	0.491423696	7.043190201	12.94057344	0.321545458	0.337639607	0.342794042	1.08603364	1.856885415	1.248251376	0.963827178	0.286029786	0.673738114	0.545028535	1.756175465	6.560633899	1.83303188	3.434298738	4.155734046	3.334658864	50.61721329	5.712058278	6.065420585	2.374135234	3.749888495	5.586207819	3.496457487	2.267741421	0.075848057	0.241248369	0.099874856	1.969761764	0.937522609	0.263988975	1.640902504	0.163853592	0.092856911	0.378758811	0.125129956	0.188165622	0.616061126	0.233120776	2.815321103	0.671390558	0.21255831	1.205972447	0.348594848
Aflibercept	8.00511061	7.184176042	1.338129085	0.639016609	9.011585328	18.16152889	0.409365	0.570998319	0.515556522	1.419660316	2.723726103	1.721849048	0.73721629	0.430318781	1.160903975	0.862499745	2.51062687	8.445915945	2.45253981	4.982784794	5.826588715	4.992371728	75.33920727	7.197771694	8.826397912	3.074995425	5.766107943	7.996523463	4.720019682	3.155231569	0.052214833	0.345631308	0.116174391	2.563239766	1.239155168	0.301456532	2.805431786	0.208388388	0.084562281	0.751429727	0.16650991	0.250326026	0.799985509	0.487740455	3.566175879	0.91440697	0.39661039	1.512537578	0.453478661
Alectinib	15.27226615	16.23400931	2.676572233	1.164433273	18.77274912	38.39810695	0.972238436	1.337771316	0.997189776	3.486007075	6.122751536	4.343454051	1.462030991	0.996213656	2.070760203	0.959972823	5.14355081	16.02275757	5.557779227	11.88376193	12.19995802	11.51288662	161.0212913	15.13954654	18.16524947	7.47956902	14.09465806	18.67988475	9.877855909	6.223989324	0.087897221	1.113131675	0.059101655	6.488515986	2.916715307	1.212703985	5.208194111	0.341815251	0.075177182	1.373268597	0.222812834	0.557974243	2.044463266	0.937071273	8.527430481	2.29521958	1.12879781	3.588019848	0.538948677
Alemtuzumab	0.998521599	0	0	0	5.810723994	8.888384565	0	0	0	0	0	0	0	0.154607297	1.995491172	0	1.262906236	6.841155553	0	0	3.669354092	2.927644071	30.98618262	2.91781879	3.035886882	0	3.838075624	1.870693669	0	1.769447691	0	0	0	0	0	0	0	0	0	0	0	0.49382716	0	0	0.938967136	0	0	0	0
Alitretinoin	2.520824664	1.859204444	0.588827347	0.12000277	2.128380225	4.714013201	0.189397098	0.068385533	0.072393966	0.809933628	0.961733929	0.725926858	0.268898973	0.070730757	0.334009478	0.23389988	0.380807683	2.272615499	0.391685858	2.243309715	1.879495615	1.293056258	21.95479855	2.393802633	2.417547925	0.889215536	1.61968884	1.974792869	1.4217712	1.370736966	0.063395461	0	0.020869856	1.24382421	0.591513193	0.258261406	0.799562792	0	0	0.130753519	0.011883541	0.228821564	0.482217507	0.228169938	1.726002701	0.419198236	0.012189473	0.737880162	0.164785002
Apalutamide_ARN-509	3.019815039	3.187153065	1.163345271	0.077389719	3.938201224	8.132875288	0.297624011	0.27648555	0.126708942	1.152605178	1.187890525	1.235540405	0.319311964	0.312275502	0.195066008	0.670085573	0.933271017	2.522108851	1.12300458	3.913570249	2.677047715	3.099719299	31.33207274	3.732218932	3.898334699	1.515655078	2.804992048	3.423045352	2.918404344	2.624066268	0.022086757	0.269935668	0	1.990140438	0.974133206	0.093453806	0.623550982	0.080301935	0.047231339	0.247633835	0.070411968	0.135406344	0.84842153	0.534219382	2.665859712	0.700807672	0.417986061	1.041684038	0.176536285
Arsenic_trioxide	4.48194881	4.570669458	1.018112749	0.307186363	5.103381746	11.17486685	0.456468638	0.302958451	0.32989177	1.71074859	1.640540791	1.651939711	0.567435478	0.276526131	0.446159211	0.457974717	2.110119325	4.212691074	1.272523079	4.29424562	3.870073655	3.360664372	40.15672	5.059756612	4.746244974	2.137123908	3.453840473	4.743192832	3.124997304	2.075742343	0.029712403	0.325467332	0.100366587	2.756634383	1.246899571	0.280229486	1.130745724	0.046046529	0.112053049	0.2598209	0.168947249	0.332124521	1.079078065	0.122677691	3.346475321	0.92607099	0.299857877	1.65450128	0.317190023
Atezolizumab	0	1.272361758	0	0	0.726216412	0	0	0	0	0	0	0	0	0	0	0	0.84227414	0	0	0	1.216545012	0	7.918886129	0	0	0	0	0	0	0.84227414	0	0	0	0	0	0	0	0	0	0	0	0	0	0	0	0	0	0	0
Avelumab	0	1.272361758	0	0	0.726216412	0	0	0	0	0	0	0	0	0	0	0	0.84227414	0	0	0	1.216545012	0	7.918886129	0	0	0	0	0	0	0.84227414	0	0	0	0	0	0	0	0	0	0	0	0	0	0	0	0	0	0	0
Axitinib	7.506065664	6.468774173	1.253553326	0.696091771	8.426604239	17.39280643	0.341322145	0.452926442	0.442283393	1.201835703	2.340383516	1.49254259	0.718117074	0.376299321	0.9577696	0.738798821	2.052180564	7.973404588	2.236564439	4.660054197	5.438005489	4.373178351	69.53939344	6.670604375	8.019660377	2.966946273	5.238351857	7.325744061	4.533782637	3.041645982	0.07482288	0.29275162	0.110815603	2.172867555	1.051932228	0.356477394	2.460819656	0.203575776	0.068355191	0.665720546	0.147497387	0.233763092	0.703556643	0.339062586	3.270301654	0.787803037	0.357076058	1.394292463	0.408901067
Belinostat	1.747175664	2.674073924	0.886256292	0.121349189	2.151795416	6.11670089	0.65954815	0.06041875	0.108977862	2.056897358	2.039371664	2.396697474	0.180587094	0.035693698	0.092738813	0.176345607	1.679816621	1.639046457	0.429237913	4.918219513	3.139248368	3.652787112	20.58356748	3.200535892	3.220915057	2.170813547	2.90166763	3.837228801	2.709551161	0.959981939	0.040862005	0.052325643	0.010681022	3.951845297	1.895690279	0.198652349	0.755457437	0.05388613	0.101375685	0.044622979	0.054181227	0.070205881	1.434764645	0.008614409	3.723197992	1.215548874	0.02571499	2.13347234	0.039836683
Bevacizumab	8.00511061	7.184176042	1.338129085	0.639016609	9.011585328	18.16152889	0.409365	0.570998319	0.515556522	1.419660316	2.723726103	1.721849048	0.73721629	0.430318781	1.160903975	0.862499745	2.51062687	8.445915945	2.45253981	4.982784794	5.826588715	4.992371728	75.33920727	7.197771694	8.826397912	3.074995425	5.766107943	7.996523463	4.720019682	3.155231569	0.052214833	0.345631308	0.116174391	2.563239766	1.239155168	0.301456532	2.805431786	0.208388388	0.084562281	0.751429727	0.16650991	0.250326026	0.799985509	0.487740455	3.566175879	0.91440697	0.39661039	1.512537578	0.453478661
Bexarotene	2.305763726	1.756372407	0.599828299	0.125717187	2.021894718	4.80789762	0.198416007	0.071641987	0.075841298	0.848501896	0.991284093	0.760494803	0.269804873	0.074098889	0.349914691	0.215341026	0.398941382	2.040522556	0.410337565	2.350133987	1.968995406	1.354630366	22.42810511	2.256468079	2.440426192	0.931559133	1.667119938	2.020514322	1.397188387	1.406313212	0.066414292	0	0.021863658	1.303053935	0.619680488	0.23862191	0.837637211	0	0	0.136979877	0.006224712	0.239717829	0.505180246	0.217757672	1.73546827	0.439160057	0.012769924	0.773017313	0.142934965
Bicalutamide	3.019815039	3.187153065	1.163345271	0.077389719	3.938201224	8.132875288	0.297624011	0.27648555	0.126708942	1.152605178	1.187890525	1.235540405	0.319311964	0.312275502	0.195066008	0.670085573	0.933271017	2.522108851	1.12300458	3.913570249	2.677047715	3.099719299	31.33207274	3.732218932	3.898334699	1.515655078	2.804992048	3.423045352	2.918404344	2.624066268	0.022086757	0.269935668	0	1.990140438	0.974133206	0.093453806	0.623550982	0.080301935	0.047231339	0.247633835	0.070411968	0.135406344	0.84842153	0.534219382	2.665859712	0.700807672	0.417986061	1.041684038	0.176536285
Binimetinib_(MEK162)	5.000233698	3.601285777	0.515226932	0.237601452	5.159046576	8.140769836	0.194105624	0.232575525	0.238795248	0.669319561	0.974931713	0.707999909	0.466697895	0.141609227	0.335486848	0.492509839	0.671769596	4.57863653	0.710653752	2.402968115	2.496258774	2.04854092	29.70209606	4.080024625	3.44006443	1.231346307	2.01149103	3.594034129	2.168232888	1.488267143	0.066816835	0.181234641	0.074196089	1.174173937	0.557513216	0.119893437	0.732209894	0.113252399	0.048222412	0.227618674	0.077631898	0.138215221	0.370682149	0.172301049	2.263827049	0.401024192	0.116619927	0.724742986	0.368601603
Blinatumomab	3.68474675	4.401242014	0.555706923	0.143732921	4.34081487	7.899242432	0.255166968	0.295358811	0.198959721	0.754313075	1.231734164	1.005395927	0.411277636	0.257718106	0.336546775	0.386902645	0.777914265	3.61415907	0.874172856	2.646727511	3.034022989	2.677012385	37.86779734	3.110693322	3.67318911	1.518766645	2.734982434	3.804300108	2.349694749	1.581132268	0.008834703	0.141457481	0.025329281	1.563664721	0.714297626	0.195760959	0.995810111	0.080301935	0	0.223402357	0.084418307	0.099286584	0.520969534	0.302205276	1.868726615	0.586042963	0.376923573	0.857661447	0.339752342
Bortezomib	1.986842414	2.816546208	0.337407727	0.146151485	3.887726476	10.11572698	0.378846776	0.351494583	0.297304667	1.99841068	1.356819544	1.446251504	0.264748318	0.268133049	0.517254134	0.296515507	0.978822375	1.865024851	0.736400097	2.93998628	2.480158785	2.5280658	40.18103932	3.036610344	4.498039146	1.563001966	4.412944487	2.973266372	2.323848285	1.632395673	0.026284906	2.094977272	0.015284911	2.406619408	1.090038917	0.076423863	0.952701391	0.031950042	0.030791981	0.154868783	0.079719914	0.088930106	0.831091539	0.08079226	2.409328418	0.803261796	0.120370628	1.257204874	0.053761707
Bosutinib	3.135233629	3.252599811	0.512915055	0.227230261	3.719477447	7.391200497	0.321671826	0.210260023	0.206301003	1.070863537	1.228800837	1.321835897	0.35050017	0.158689966	0.283788325	0.340795891	1.16931585	3.316168916	0.710131542	3.326840533	2.676081947	2.454398531	26.78626746	3.36963403	3.342494812	1.506794818	2.403372422	3.465496904	2.532810441	1.339301007	0.053107365	0.310565119	0.069259752	1.986927732	0.926617708	0.123839026	0.73716179	0.096972597	0.054134338	0.204445212	0.061141604	0.109661415	0.643749211	0.156696683	2.404147205	0.641771588	0.137335272	1.104656863	0.226285248
Brentuximab_vedotin	15.1905157	17.00073789	2.382965148	0.660015233	19.46744997	29.0742801	1.041684038	1.306452813	0.664562163	3.24803637	5.239681635	4.30014627	1.648414771	1.032048076	1.003718793	0.598262461	3.101857899	12.86203855	3.610858582	14.89845438	11.40489467	13.46140126	142.1691073	14.88475818	13.92591897	6.077511327	11.82238169	17.41992819	8.264101551	4.978280184	0	0.844671202	0	6.841033156	3.125052115	1.318251006	3.933673447	0.140528387	0	2.170260256	0.032679739	0.249907867	2.401434234	2.49203277	8.509805709	2.452826854	3.126163754	3.645894134	0.306059099
Brigatinib	6.989260492	5.723291163	1.063114062	0.520496538	7.469638927	13.72828033	0.347794067	0.362713831	0.370777229	1.174689447	2.008467898	1.350149448	1.039957203	0.309379157	0.728737144	0.551531482	1.816069522	6.927028793	1.801167905	3.714649655	4.428234201	3.579994488	54.06309295	6.147583103	6.461529394	2.550487013	4.00758767	6.036704412	3.724993442	2.39384715	0.070984392	0.260942113	0.108027905	2.130558642	1.014055067	0.247841397	1.758501034	0.177229396	0.100437067	0.409677898	0.132676912	0.20352608	0.666351831	0.252151043	3.02148145	0.72619795	0.229910009	1.284758134	0.351597048
Cabazitaxel	0.427287785	0.546505921	0	0.418244406	1.385682032	3.359703976	0	0	0.066511531	0.204039634	0.032509211	0	0.084896469	0	0.134442293	0.152657633	0.1659079	1.711862979	0.036923536	0.392403693	0.971801963	0.483535776	12.6053289	0.820629591	0.648235392	0.31234705	0.236416034	0.751694379	0.626911191	1.057587625	0.032548905	0	0.186636805	0	0	0	0	0	0.086374928	0	0.161597249	0.505698837	0	0	0.684185392	0	0.019869336	0	0.032822937
Cabozantinib	6.067919607	5.164700949	1.117904284	0.622647033	6.724284742	13.53801411	0.318266834	0.368437257	0.362049318	1.04589488	1.872239349	1.313679882	0.658192071	0.302274353	0.760255554	0.600737657	1.732301131	6.220074117	1.644862517	3.823397468	4.275215404	3.595237316	53.31015966	5.371968436	6.235865656	2.301054743	4.040960104	5.691734635	3.562219868	2.475005058	0.059488055	0.311726154	0.131487068	1.923114484	0.924225406	0.265522848	1.837421724	0.166831278	0.097614698	0.517955565	0.126445222	0.177175354	0.620543047	0.317493832	2.759961642	0.686297673	0.309200748	1.190566971	0.373193048
Carfilzomib	2.089365844	2.402128635	0.376339388	0.163015118	4.277006588	10.43867086	0.222236012	0.39205165	0.331609052	1.628024968	0.912404085	0.91199319	0.295296201	0.299071478	0.576937303	0.180956489	0.513349584	2.054951833	0.821369339	2.077272345	1.991477933	2.102524947	42.11632356	2.522990403	4.310059599	1.142376786	4.220996902	2.590375372	1.971893131	1.82074902	0.02931778	2.336705419	0.017048554	1.382201214	0.600971561	0.085242001	0.716808718	0.010809876	0.034344902	0.136624137	0.088918366	0.064727528	0.526339009	0.090114444	1.496761942	0.495298142	0.134259547	0.701133487	0.05996498
Ceritinib_(Zykadia_LDK378)	15.27226615	16.23400931	2.676572233	1.164433273	18.77274912	38.39810695	0.972238436	1.337771316	0.997189776	3.486007075	6.122751536	4.343454051	1.462030991	0.996213656	2.070760203	0.959972823	5.14355081	16.02275757	5.557779227	11.88376193	12.19995802	11.51288662	161.0212913	15.13954654	18.16524947	7.47956902	14.09465806	18.67988475	9.877855909	6.223989324	0.087897221	1.113131675	0.059101655	6.488515986	2.916715307	1.212703985	5.208194111	0.341815251	0.075177182	1.373268597	0.222812834	0.557974243	2.044463266	0.937071273	8.527430481	2.29521958	1.12879781	3.588019848	0.538948677
Cetuximab	6.989260492	5.723291163	1.063114062	0.520496538	7.469638927	13.72828033	0.347794067	0.362713831	0.370777229	1.174689447	2.008467898	1.350149448	1.039957203	0.309379157	0.728737144	0.551531482	1.816069522	6.927028793	1.801167905	3.714649655	4.428234201	3.579994488	54.06309295	6.147583103	6.461529394	2.550487013	4.00758767	6.036704412	3.724993442	2.39384715	0.070984392	0.260942113	0.108027905	2.130558642	1.014055067	0.247841397	1.758501034	0.177229396	0.100437067	0.409677898	0.132676912	0.20352608	0.666351831	0.252151043	3.02148145	0.72619795	0.229910009	1.284758134	0.351597048
Cobimetinib	5.000233698	3.601285777	0.515226932	0.237601452	5.159046576	8.140769836	0.194105624	0.232575525	0.238795248	0.669319561	0.974931713	0.707999909	0.466697895	0.141609227	0.335486848	0.492509839	0.671769596	4.57863653	0.710653752	2.402968115	2.496258774	2.04854092	29.70209606	4.080024625	3.44006443	1.231346307	2.01149103	3.594034129	2.168232888	1.488267143	0.066816835	0.181234641	0.074196089	1.174173937	0.557513216	0.119893437	0.732209894	0.113252399	0.048222412	0.227618674	0.077631898	0.138215221	0.370682149	0.172301049	2.263827049	0.401024192	0.116619927	0.724742986	0.368601603
Crizotinib	6.869655374	6.444708946	1.27058612	0.676258751	8.327321183	15.92138757	0.471923537	0.417947832	0.436749274	1.50745451	2.459796052	1.786512524	0.791676732	0.326793675	0.858489703	0.558373814	2.071846369	7.308700687	1.915533611	4.953284028	5.270650779	4.505027142	62.4987545	6.752318041	7.353907754	3.197950027	4.887586529	7.052189721	4.049373721	2.800109217	0.100447798	0.332300985	0.126032556	2.801945166	1.331876251	0.350647039	2.090068619	0.210470433	0.097169906	0.563863567	0.160001288	0.260675129	0.915522923	0.356880543	3.678511417	0.962012471	0.337605605	1.63871884	0.35080267
CYT387_(Momelotinib)	3.228944449	2.186405037	0.349577207	0.088933383	2.84219131	5.296588261	0.096148069	0.127893828	0.114573311	0.318925332	0.49265661	0.347696366	0.270989495	0.095191638	0.20390972	0.452113541	0.448701947	2.788647901	0.601083829	1.688842765	1.745111903	1.413674082	20.21980075	2.018894213	1.80315684	0.686573551	1.378064349	2.09417599	1.476060896	1.03811298	0.030594885	0.112784251	0.016417126	0.522635619	0.26690586	0.133794604	0.56301386	0.049722755	0.029311991	0.178047498	0.039388604	0.067766185	0.203463542	0.169107224	1.121399127	0.193574875	0.184380212	0.29086519	0.37512307
Dabrafenib	5.706906479	4.15726145	0.583572867	0.25175183	5.497868719	8.919744052	0.227829324	0.253141777	0.269041214	0.792529968	1.153577845	0.864915102	0.525042491	0.177992931	0.389943051	0.5143238	0.839100055	5.183182557	0.838522709	2.7369715	2.829373085	2.270139065	33.64152141	4.645990115	4.07172561	1.444214227	2.418348652	4.402310112	2.573021266	1.719737965	0.068161191	0.216090386	0.075082729	1.41410545	0.671180166	0.148849536	0.867998339	0.123595213	0.039521453	0.258647752	0.08130127	0.162782614	0.462893013	0.225844856	2.502484315	0.480561482	0.164770324	0.840395027	0.365354765
Daratumumab	2.119150194	1.66791576	0.15405724	0.308741927	2.94176518	4.39988285	0	0	0.169908365	0.291120815	0.326564274	0	0.280617842	0	0.153609831	0.476547533	0.058224163	2.633988247	0.08853475	1.063235939	2.503495122	0.976998706	21.25119354	1.515162031	2.585351255	0.689206804	1.501758849	1.593498513	0.868748485	0.778318691	0.061842919	0.078616352	0.177304965	0	0	0.134138162	0.244200244	0.224845419	0	0	0	0.053646589	0	0	0.365182856	0.177777778	0.600766409	0.385356455	0.124727159
Dasatinib	3.103056669	3.016638526	0.450260505	0.230937497	3.39733475	6.516419619	0.261859731	0.189856064	0.186258642	0.87327043	1.050191913	1.066409646	0.338842131	0.152986083	0.271501938	0.340131505	1.012592638	3.223033239	0.661427703	2.688586288	2.479798323	2.048871786	24.53625001	2.956801099	3.017058083	1.284144308	2.099205393	2.9890406	2.213467586	1.216571202	0.042805904	0.230959305	0.069688403	1.631461758	0.760585724	0.106114224	0.763585	0.081454527	0.040997621	0.162144069	0.067249398	0.089042977	0.516798429	0.121810789	1.985561106	0.531259399	0.129944146	0.917797424	0.258733016
Degarelix	4.015051121	6.581169591	1.343351176	0	10.57213198	14.91169052	0	0.94497508	0.669614437	0.843902426	0.293944738	0	0.929784929	1.135240978	0.643770614	0.583858312	0.527897584	7.394141457	0.345766544	2.731158241	2.09781322	3.530372721	75.32176117	7.459560022	3.135883912	0.457629288	6.332987935	5.161392471	2.597706526	2.780056309	0.388704208	0.116103564	0	0	0.922135695	1.253234514	0.861646771	0.374742365	0	0.234907212	0.074822297	0.476871722	1.425007734	0.488208312	0.465776308	0	0.083166999	0	0.764775785
Denileukin_diftitox_(Ontac)	7.721613059	6.296282214	0.902392317	0.557406299	8.098067953	14.46307343	0.376218808	0.296139819	0.24505442	1.101527843	2.219325469	1.268690945	0.612686794	0.214102167	0.723557724	0.493970747	1.641069693	7.185754306	1.987640917	4.599856391	5.547146076	4.660601937	65.07084727	5.996066475	7.019067257	2.954195953	4.802338512	6.189539011	3.751073681	2.342276477	0.075292913	0.199847289	0.038544558	2.10014704	1.000735535	0.449334154	2.741313818	0.147334647	0.034145785	0.536303699	0.115244797	0.164139777	0.672561871	0.38870078	2.976131795	0.744252256	0.483994469	1.284560716	0.351989033
Denosumab	10.61639248	10.65488195	1.413337641	0.737332421	13.70337983	18.67280757	0.574444209	0.834536325	0.510313229	1.430351728	3.984509289	1.865375619	0.628694833	0.383474744	0.856382631	0.676132451	2.538609025	10.24434615	3.08646247	7.674850135	6.524252208	9.145649766	102.103958	9.89330218	10.61705881	2.98244875	7.794388391	10.08816449	5.085198451	4.03052129	0.072088837	0.264010366	0.189969605	2.954144079	1.339308049	0.459990781	2.547934375	0.103107993	0.012266627	0.846202343	0.179530242	0.142804495	0.983748078	2.054214489	3.770464423	1.103991334	0.754800668	1.730546133	0.588436251
Docetaxel	1.479522297	2.091320185	0.052093879	0.318612305	2.89132049	6.588655034	0.268821687	0.194019329	0.185477397	1.002270284	1.078524873	0.964076657	0.156351106	0.007860152	0.270262789	0.14649395	0.313502012	2.491029477	0.556583619	2.180881336	2.637580088	2.189545038	21.94468724	2.545683224	2.022866135	1.484301679	1.57016035	2.141433637	1.589412369	1.575342671	0.060859063	0	0.1143903	1.747340967	0.980983106	0.161768963	0.517586337	0	0.026257864	0.030289262	0.122408947	0.286102568	0.537643375	0.008650594	2.150384146	0.537643375	0.041054974	0.954601673	0.060351851
Dovitinib	4.458938062	3.892548986	0.972813721	0.338790097	4.86354821	9.31099548	0.226044917	0.26347703	0.264449809	0.752761727	1.277767995	0.914906014	0.482616874	0.218252256	0.530944204	0.477078334	1.138238744	4.402501587	1.14850144	2.784921224	3.107572789	2.485617801	36.03407076	4.001836364	4.210995628	1.579131333	2.771331099	4.089798944	2.628526169	1.754971307	0.041071547	0.157835906	0.065968662	1.383740244	0.66017188	0.237839647	1.138433802	0.146972214	0.060210951	0.311586921	0.091799711	0.141790428	0.457474772	0.174109464	1.971185878	0.49998718	0.202288869	0.86984029	0.316694009
Durvalumab	6.138816835	6.904653852	1.085656101	0.387564482	7.009641569	12.51807599	0.390631514	0.45612969	0.290780417	1.252935355	2.141237117	1.687798757	0.507328666	0.371879013	0.402178376	0.556269106	1.307197781	5.930938559	1.637962195	4.600171977	4.201771298	4.29387802	56.63483405	5.438954384	6.114723065	2.42871692	4.594663065	6.393148816	3.777888653	2.273370064	0.046894721	0.23100907	0.110815603	2.574148297	1.171894543	0.386308922	1.652708737	0.070264193	0	0.430007211	0.061610472	0.124953933	0.860779568	0.661074041	3.023846425	0.910436862	0.519492519	1.432840264	0.349355436
Elotuzumab	2.470589136	3.258507103	0	0	3.835512297	9.759947894	0	1.389318337	0	0	0	0.674210342	2.224704114	0	0.666666667	0	0.200320513	4.051745068	0.736322804	0	0.689941583	4.115879742	64.67799236	3.58349794	0.732600733	1.020979792	3.440154165	1.51457985	1.494797329	1.743848091	0	0.393081761	0	0	0	0	0	0	0	0	0	0	0	0	0.40063004	0.888888889	1.876612714	0	1.401148942
Enzalutamide	3.019815039	3.187153065	1.163345271	0.077389719	3.938201224	8.132875288	0.297624011	0.27648555	0.126708942	1.152605178	1.187890525	1.235540405	0.319311964	0.312275502	0.195066008	0.670085573	0.933271017	2.522108851	1.12300458	3.913570249	2.677047715	3.099719299	31.33207274	3.732218932	3.898334699	1.515655078	2.804992048	3.423045352	2.918404344	2.624066268	0.022086757	0.269935668	0	1.990140438	0.974133206	0.093453806	0.623550982	0.080301935	0.047231339	0.247633835	0.070411968	0.135406344	0.84842153	0.534219382	2.665859712	0.700807672	0.417986061	1.041684038	0.176536285
Erlotinib	6.926177534	5.665480141	1.052375536	0.515238997	7.413985666	13.62943612	0.344280996	0.359050055	0.367032004	1.162823897	1.988180343	1.336511574	1.029452584	0.306254115	0.721376162	0.549909265	1.797725385	6.875802801	1.789289684	3.703905412	4.403571875	3.571993568	53.6784565	6.12869718	6.409864702	2.530979394	3.974426559	5.975727599	3.715953499	2.384220957	0.070267378	0.258306334	0.106936714	2.109037848	1.003812087	0.245337949	1.740738397	0.1754392	0.099422551	0.405539737	0.131336742	0.201470262	0.659621004	0.270886097	2.990961435	0.718862617	0.227587686	1.271780779	0.348045562
Estramustine	4.176189409	4.7144728	0.845228396	0.192735176	5.620602366	9.785071668	0.619698766	0.249403537	0.236508599	1.933220893	2.417953636	2.339249273	0.437454594	0.210274733	0.338877488	0.393395003	1.132796096	4.281148508	0.953628383	5.274446387	4.076226425	4.300870606	37.16242084	5.955559514	4.872944644	3.153789309	4.230145763	4.90472463	3.88163236	1.745976278	0.069326884	0.142295514	0.025329281	3.930893669	1.79879038	0.360878801	1.140312549	0.080301935	0.069393944	0.15590415	0.093052905	0.197208593	1.295357772	0.357958188	4.204348369	1.249546939	0.191492487	2.095525185	0.266614336
Everolimus	2.774334792	2.784615185	0.500690354	0.173940162	3.184352897	5.838770312	0.17964772	0.240559532	0.180799154	0.612587322	0.766958217	0.797793519	0.29437152	0.214885675	0.258918682	0.398260941	0.552860862	2.896044563	0.709015424	1.999610923	1.990595543	1.468940105	22.32608851	2.846113761	3.10825768	0.960458387	1.609808021	2.525836796	1.774607221	1.553612315	0.043744407	0.161358652	0.051772489	1.129578435	0.539429599	0.092391772	0.539493635	0.101392732	0.031920368	0.150022592	0.164860912	0.132536988	0.370042281	0.191968556	1.695162532	0.398213025	0.157645662	0.660319572	0.273345681
Exemestane	0.38995456	0.066032752	0.056882821	0	0.682978447	3.968771574	0	0.668449198	0.268939394	0.157529931	0	0	0	0	0	0	0.072780204	0.667048237	0.652968344	0.266240682	0.794449139	0.229166104	11.79503422	0.239463602	0.628527078	0.570436508	0.403461726	0.217098826	0.168350168	0.267556518	0.077303649	0	0	0	0.156347717	0	0	0	0	0	0	0	0.056882821	0	0.496031746	0	0	0	0
Flavopiridol_(Alvociclib)	3.620136287	3.093780008	0.605576933	0.322603885	3.759089349	7.65235942	0.287370031	0.186796235	0.190504199	1.138624289	1.259292361	1.057046773	0.485451143	0.134253201	0.3133005	0.27718277	1.035020962	3.371413343	0.805596751	2.687667884	2.683468157	2.418328879	29.93837215	3.369231362	3.753233472	1.515844934	2.462745419	3.311804693	2.356092548	1.376601522	0.035493382	0.148255939	0.063436458	1.756033651	0.829847673	0.141715006	0.85251597	0.086150484	0.06819569	0.178323626	0.06906121	0.11979426	0.572699276	0.106476785	2.217547125	0.568541256	0.099180614	1.019311371	0.164218167
Foretinib	4.79961233	3.701391272	0.766579496	0.35690579	5.033350455	9.096618512	0.209019425	0.245593145	0.252198094	0.709919725	1.205100298	0.867177278	0.630073109	0.194816148	0.472644485	0.490867492	1.164648903	4.52934915	1.120724897	2.531703592	2.927818379	2.320097766	34.66994112	4.048732367	4.093208717	1.500780319	2.527989421	3.907390598	2.540344148	1.667933943	0.047608261	0.148629346	0.084581943	1.293487926	0.615736893	0.207947233	1.049640629	0.101053048	0.075099067	0.295554034	0.08289597	0.124690898	0.419303716	0.178664979	1.967725348	0.450614194	0.194832623	0.803824854	0.331416471
Fulvestrant	3.911256177	4.266017333	0.87459306	0.171584094	5.21341457	8.798973861	0.530991536	0.243988394	0.244166307	1.6715916	2.049703111	2.0281972	0.436833194	0.215634877	0.25787421	0.386413438	1.06889302	3.965765308	0.751605812	4.672167926	3.560434095	3.679221918	34.26515133	5.269750025	4.427647243	2.856084353	3.81344495	4.564405134	3.530915398	1.555469167	0.073528513	0.150919485	0.026864389	3.348408892	1.529013783	0.362426279	0.849469664	0.085168719	0.073599638	0.136899336	0.098692475	0.209160629	1.12133484	0.371526308	3.710763317	1.072747593	0.183531856	1.780600149	0.263874726
Ganetespib_(STA-9090)	1.423514982	1.942091793	0.281128388	0.120672454	1.365034088	3.714419686	0.325076161	0.114276673	0.081312289	0.87233108	0.948712458	1.162074493	0.145661626	0.108164919	0.228931093	0.389669566	0.551734332	1.244244174	0.270148191	2.597403958	1.888939289	1.559748272	13.82968533	1.884971849	2.193370842	1.000938317	1.476321491	1.734555426	1.730562688	1.015075438	0	0.077582397	0.029550827	1.850649254	0.854001356	0.109828953	0.537899948	0.014344321	0.040041455	0.07106236	0.067412936	0.079816586	0.579813596	0.054340993	2.187427657	0.586246007	0.06866016	1.01505582	0.131144553
Gefitinib	6.989260492	5.723291163	1.063114062	0.520496538	7.469638927	13.72828033	0.347794067	0.362713831	0.370777229	1.174689447	2.008467898	1.350149448	1.039957203	0.309379157	0.728737144	0.551531482	1.816069522	6.927028793	1.801167905	3.714649655	4.428234201	3.579994488	54.06309295	6.147583103	6.461529394	2.550487013	4.00758767	6.036704412	3.724993442	2.39384715	0.070984392	0.260942113	0.108027905	2.130558642	1.014055067	0.247841397	1.758501034	0.177229396	0.100437067	0.409677898	0.132676912	0.20352608	0.666351831	0.252151043	3.02148145	0.72619795	0.229910009	1.284758134	0.351597048
Goserelin	2.264346556	4.217232319	0.974193271	0.033796343	5.60398624	9.489833755	0.119047619	0.575097386	0.469563498	0.507139489	0.125976316	0	0.58291935	0.678398597	0.275901692	0.250224991	0.385500562	4.583876245	0.549956073	1.512537519	1.714882136	2.48734525	49.32117481	3.973811642	1.920564918	0.588754124	3.761899176	3.999876708	1.58828597	1.585538546	0.254934545	0.04975867	0	0	0.395201012	1.0051879	0.495253504	0.240905806	0	0.100674519	0.032066699	0.306560392	0.6107176	0.209232134	0.235261417	0	0.071285999	0	0.327761051
Homoharringtonine_(Omacetaxine_mepesuccinate)	3.103749839	0.22521267	0.885863987	0.17921147	0.184504774	7.048069457	0	0	0	0.080906149	0	0	0	0	0	0.129198966	0	0.209148926	0	2.008032129	5.161098638	0.057336318	36.73270909	1.567787658	4.033376966	0.049603175	0.310471115	0.640574047	0	2.81810047	0.009110019	0	0	0	0	0	0	0	0	0	0	0	0	0	0	0	0.009110019	0	0
Ibritumomab_tiuxetan	3.330343637	2.760171962	0.04472592	0.063808065	4.922715665	4.412966912	0.26042101	0.103135314	0.44044031	0.781263029	0.977096864	0.911473533	0.196838462	0.103135314	0.103135314	0.467726848	0	2.409905752	0.185954653	2.802406122	2.881135918	1.722221163	17.33266231	2.666878099	2.55448867	0.860279691	2.179420807	2.125919023	1.493401595	0.635928933	0	0.04913522	0	1.692736562	0.781263029	0.083836351	0.413046162	0.070264193	0	0	0	0	0.520842019	0	2.019923068	0.63195313	0.313103756	0.911473533	0.467726848
Ibrutinib	7.917323103	6.662022783	0.794524958	0.46211236	9.29912359	13.01203577	0.294998702	0.526957806	0.36457433	0.797285506	2.287981768	0.969587219	0.523078041	0.254714168	0.714638439	0.559271226	1.51188654	6.918364672	1.561730326	4.451684887	4.364736258	6.086822844	63.50886355	6.210074316	6.192005244	1.888362036	4.56291244	5.551764427	3.19845856	2.705371599	0.024371038	0.22951102	0.098502758	1.540888014	0.694456025	0.283210887	1.901954072	0.126808756	0.031323826	0.545413449	0.091374515	0.148912101	0.506498158	0.838807624	2.373690188	0.575162977	0.360164831	0.887359248	0.454038135
Idelalisib	3.800675689	2.875362653	0.495795159	0.221001891	3.92116479	7.357211008	0.160619255	0.226868921	0.22554515	0.499168375	0.831180516	0.57196522	0.358771727	0.166614305	0.327043584	0.715761649	0.62627907	3.841520469	0.768801394	2.005246054	2.165319257	1.797142855	25.81590728	3.11716633	2.947629366	0.952994041	2.144192174	2.686765415	1.834711996	1.603047589	0.045874208	0.109580523	0.070981735	0.903025221	0.434920873	0.081028163	0.686312194	0.107462292	0.041575933	0.193783286	0.063846919	0.110410998	0.306558944	0.193095491	1.502917286	0.317332183	0.122164136	0.562977764	0.610573414
Imatinib	3.712572703	3.821482116	0.590660963	0.258369096	4.047695293	7.75372424	0.372399107	0.20836526	0.20063363	1.209130884	1.509461913	1.440573009	0.374857871	0.164355978	0.332298798	0.332147054	1.498196038	3.866124599	0.816487683	3.507712969	3.244570816	2.755122501	30.08541984	3.717441801	3.738747432	1.773112142	2.727830944	3.951422902	2.632153033	1.319036481	0.034796186	0.158967885	0.057705504	2.326008053	1.09123572	0.149535804	1.040643293	0.127328809	0.086620802	0.19023876	0.068440814	0.098020578	0.744577166	0.124653321	2.629744705	0.769878519	0.135959502	1.31698882	0.275513099
Inotuzumab_ozogamicin	3.811013781	2.275685846	0.381004318	0.127616131	4.585499814	5.646860931	0	0.347329584	0.055078211	0	0.39166767	0.168552586	0.68111356	0	0.166666667	0.311817898	0.050080128	2.723410416	0.184080701	1.286147193	2.490723889	1.941491536	32.14704269	2.320513408	1.845107036	0.327866589	2.308491815	1.712649168	1.077678948	1.027560541	0	0.393081761	0	0	0	0.167672703	0.305250305	0	0	0	0	0	0	0	0.964658207	0.444444444	1.095360691	0	0.662105134
Ipilimumab	1.99011635	2.411439663	0.190502159	0	2.797038428	2.765843471	0	0	0	0	0.231481481	0	0.062468766	0	0	0.467726848	0.204569302	1.944860234	0.242344431	1.013043061	0.640879543	0.156054931	12.97688198	1.880012329	1.361408475	0.085411684	0.623054589	0.325810657	0.72975215	0.822602123	0	0	0	0	0	0	0.220458554	0	0	0	0	0	0	0	0.381806442	0	0	0	0.467726848
Ixabepilone	0.427287785	0.546505921	0	0.418244406	1.385682032	3.359703976	0	0	0.066511531	0.204039634	0.032509211	0	0.084896469	0	0.134442293	0.152657633	0.1659079	1.711862979	0.036923536	0.392403693	0.971801963	0.483535776	12.6053289	0.820629591	0.648235392	0.31234705	0.236416034	0.751694379	0.626911191	1.057587625	0.032548905	0	0.186636805	0	0	0	0	0	0.086374928	0	0.161597249	0.505698837	0	0	0.684185392	0	0.019869336	0	0.032822937
Ixazomib_(MLN9708)	2.089365844	2.402128635	0.376339388	0.163015118	4.277006588	10.43867086	0.222236012	0.39205165	0.331609052	1.628024968	0.912404085	0.91199319	0.295296201	0.299071478	0.576937303	0.180956489	0.513349584	2.054951833	0.821369339	2.077272345	1.991477933	2.102524947	42.11632356	2.522990403	4.310059599	1.142376786	4.220996902	2.590375372	1.971893131	1.82074902	0.02931778	2.336705419	0.017048554	1.382201214	0.600971561	0.085242001	0.716808718	0.010809876	0.034344902	0.136624137	0.088918366	0.064727528	0.526339009	0.090114444	1.496761942	0.495298142	0.134259547	0.701133487	0.05996498
Lapatinib	6.504192168	5.31237042	1.05682677	0.491423696	7.043190201	12.94057344	0.321545458	0.337639607	0.342794042	1.08603364	1.856885415	1.248251376	0.963827178	0.286029786	0.673738114	0.545028535	1.756175465	6.560633899	1.83303188	3.434298738	4.155734046	3.334658864	50.61721329	5.712058278	6.065420585	2.374135234	3.749888495	5.586207819	3.496457487	2.267741421	0.075848057	0.241248369	0.099874856	1.969761764	0.937522609	0.263988975	1.640902504	0.163853592	0.092856911	0.378758811	0.125129956	0.188165622	0.616061126	0.233120776	2.815321103	0.671390558	0.21255831	1.205972447	0.348594848
Lenalidomide	10.61639248	10.65488195	1.413337641	0.737332421	13.70337983	18.67280757	0.574444209	0.834536325	0.510313229	1.430351728	3.984509289	1.865375619	0.628694833	0.383474744	0.856382631	0.676132451	2.538609025	10.24434615	3.08646247	7.674850135	6.524252208	9.145649766	102.103958	9.89330218	10.61705881	2.98244875	7.794388391	10.08816449	5.085198451	4.03052129	0.072088837	0.264010366	0.189969605	2.954144079	1.339308049	0.459990781	2.547934375	0.103107993	0.012266627	0.846202343	0.179530242	0.142804495	0.983748078	2.054214489	3.770464423	1.103991334	0.754800668	1.730546133	0.588436251
Lenvatinib	5.903784834	4.927101785	0.844356799	0.510911641	6.138841572	11.9213494	0.309946082	0.318790378	0.303874035	1.035813163	1.850702997	1.243353679	0.577280727	0.267993716	0.790583574	0.568854338	1.594279153	5.72234794	1.403150192	3.483008014	3.904329682	3.150539758	46.6768949	5.254423761	5.491422682	2.174169409	3.628011674	5.320937042	3.302793711	2.258852784	0.051763963	0.27130791	0.077034529	1.94209157	0.926557025	0.295519985	1.538235587	0.142493453	0.089243733	0.408294776	0.126189902	0.168580002	0.626854163	0.231817219	2.640722456	0.679881542	0.251785748	1.194218782	0.373366456
Letrozole	0.38995456	0.066032752	0.056882821	0	0.682978447	3.968771574	0	0.668449198	0.268939394	0.157529931	0	0	0	0	0	0	0.072780204	0.667048237	0.652968344	0.266240682	0.794449139	0.229166104	11.79503422	0.239463602	0.628527078	0.570436508	0.403461726	0.217098826	0.168350168	0.267556518	0.077303649	0	0	0	0.156347717	0	0	0	0	0	0	0	0.056882821	0	0.496031746	0	0	0	0
Leuprolide	4.015051121	6.581169591	1.343351176	0	10.57213198	14.91169052	0	0.94497508	0.669614437	0.843902426	0.293944738	0	0.929784929	1.135240978	0.643770614	0.583858312	0.527897584	7.394141457	0.345766544	2.731158241	2.09781322	3.530372721	75.32176117	7.459560022	3.135883912	0.457629288	6.332987935	5.161392471	2.597706526	2.780056309	0.388704208	0.116103564	0	0	0.922135695	1.253234514	0.861646771	0.374742365	0	0.234907212	0.074822297	0.476871722	1.425007734	0.488208312	0.465776308	0	0.083166999	0	0.764775785
Lomustine	4.8870437	7.536346839	0	0	4.141291642	18.7658286	2.083368076	0	1.984126984	7.325624286	6.851788947	7.68772879	0	0	0	0	0	1.136634031	0.122279286	15.71179267	8.598511719	10.90065232	58.96375877	8.46157543	9.220773739	6.250104229	10.88874386	7.746540428	7.774159517	2.786487683	0	1.54012654	0	13.5418925	6.250104229	0	2.083368076	0	0.985105789	0	0	0	4.166736153	0.813734246	12.03582745	4.166736153	0	7.291788268	0
Masitinib	3.10041132	2.746346916	0.438566504	0.201880879	3.368698041	6.04732065	0.221984855	0.187529289	0.169031524	0.750183697	0.909222985	0.902390656	0.328188744	0.124572	0.22937151	0.331385896	0.838107867	3.077175608	0.613728437	2.38056947	2.226966072	1.859755788	22.50921885	2.802021798	2.687408195	1.117787549	1.86383546	2.710785289	1.965773916	1.166642785	0.041777934	0.190520114	0.066556465	1.383669832	0.661228234	0.110697508	0.6434028	0.072248774	0.038324739	0.136363705	0.059527113	0.086955258	0.439580732	0.109167599	1.798756509	0.454764278	0.118952634	0.788139472	0.251686853
Medroxyprogesterone_acetate_(MPA)	3.649758457	3.945492441	0.903645574	0.157285419	5.090530916	8.475781296	0.486742241	0.223656028	0.223819114	1.563259723	1.878894518	1.859180767	0.400430428	0.204433768	0.236384692	0.365071539	0.987905291	3.773344459	0.688971995	4.339052754	3.326095992	3.527931436	32.4589491	4.876358437	4.137039385	2.647191616	3.495657871	4.238312134	3.28078278	1.503493789	0.075990432	0.138342861	0.02462569	3.069374817	1.401595968	0.332224089	0.778680526	0.078071326	0.067466335	0.125491058	0.090468102	0.191730577	1.02789027	0.340565782	3.550817757	0.98335196	0.168237535	1.632216804	0.241885165
Megestrol	0.615389531	0.179879412	0.556742994	0	2.944401918	3.689406293	0	0	0	0.159261029	0	0.025408828	0	0.034809245	0	0.167542255	0.070205904	1.503684042	0.237548447	0.860293134	1.135328633	1.989539013	12.87388763	2.213634782	0.908001866	0.724456848	0.256628383	0.279123913	1.035435717	0.811000286	0.044173514	0	0	0	0	0	0	0	0	0	0	0	0.032504469	0.510220904	0.767749967	0	0	0	0
Methyltestosterone	3.019815039	3.187153065	1.163345271	0.077389719	3.938201224	8.132875288	0.297624011	0.27648555	0.126708942	1.152605178	1.187890525	1.235540405	0.319311964	0.312275502	0.195066008	0.670085573	0.933271017	2.522108851	1.12300458	3.913570249	2.677047715	3.099719299	31.33207274	3.732218932	3.898334699	1.515655078	2.804992048	3.423045352	2.918404344	2.624066268	0.022086757	0.269935668	0	1.990140438	0.974133206	0.093453806	0.623550982	0.080301935	0.047231339	0.247633835	0.070411968	0.135406344	0.84842153	0.534219382	2.665859712	0.700807672	0.417986061	1.041684038	0.176536285
Midostaurin	13.02974028	14.16184612	2.02741758	0.92648583	15.9520663	31.63698802	1.018299171	1.077430611	0.801183823	3.473110781	5.60028224	4.255102346	1.24858105	0.876263874	1.698924596	0.82672091	4.490394348	13.33688457	4.226142558	10.83133065	10.86725397	10.22151313	132.4970788	13.21057173	15.38860415	6.52627801	12.08892074	15.64194898	8.873299462	5.312476014	0.185072174	1.138063215	0.088933562	6.59024935	3.002850048	1.405910104	4.27674978	0.409501013	0.130862156	1.144115496	0.254021716	0.535392525	2.094928113	0.814987821	8.042270665	2.407228389	1.031280224	3.729309166	0.533406032
Mogamulizumab	9.318127093	9.937534385	1.36513337	0.35409321	11.87856314	20.70418297	0.684747579	0.672473115	0.603378978	2.035707691	2.927345508	2.535817421	1.021263993	0.412819231	0.622513684	0.467195397	2.069839007	10.02102628	2.127036946	9.027890334	6.577980009	7.828622114	85.8456382	9.19863427	7.417004631	3.982742877	6.266175734	11.04122848	5.249426871	3.753494473	0.147532722	0.337868481	0	4.090602512	2.103341771	0.62391876	2.233980652	0.281056773	0	1.448809272	0.072432964	0.189568882	1.577801308	1.905904017	6.237042906	1.397804357	1.472187007	2.230086359	0.309514379
Moxetumomab_pasudotox	3.811013781	2.275685846	0.381004318	0.127616131	4.585499814	5.646860931	0	0.347329584	0.055078211	0	0.39166767	0.168552586	0.68111356	0	0.166666667	0.311817898	0.050080128	2.723410416	0.184080701	1.286147193	2.490723889	1.941491536	32.14704269	2.320513408	1.845107036	0.327866589	2.308491815	1.712649168	1.077678948	1.027560541	0	0.393081761	0	0	0	0.167672703	0.305250305	0	0	0	0	0	0	0	0.964658207	0.444444444	1.095360691	0	0.662105134
Necitumumab	6.989260492	5.723291163	1.063114062	0.520496538	7.469638927	13.72828033	0.347794067	0.362713831	0.370777229	1.174689447	2.008467898	1.350149448	1.039957203	0.309379157	0.728737144	0.551531482	1.816069522	6.927028793	1.801167905	3.714649655	4.428234201	3.579994488	54.06309295	6.147583103	6.461529394	2.550487013	4.00758767	6.036704412	3.724993442	2.39384715	0.070984392	0.260942113	0.108027905	2.130558642	1.014055067	0.247841397	1.758501034	0.177229396	0.100437067	0.409677898	0.132676912	0.20352608	0.666351831	0.252151043	3.02148145	0.72619795	0.229910009	1.284758134	0.351597048
Nilotinib	5.701379112	6.875464119	1.206046506	0.521892338	6.729737637	14.77042986	0.842358403	0.338708509	0.329628039	2.773502218	3.474918805	3.325381464	0.604918209	0.296490048	0.69623913	0.378988224	3.560980403	6.971412403	1.679418665	7.427255789	6.273996417	5.606195253	57.89416556	7.117532307	7.882088967	3.935818202	5.753834794	7.957127617	4.926052326	2.185293665	0.064997851	0.363612442	0.071190253	5.399833563	2.53340659	0.255063535	2.255755459	0.158704515	0.129027353	0.396151745	0.115938294	0.183596772	1.698999843	0.23993898	5.66450215	1.757321335	0.296073436	3.003394643	0.262877099
Nilutamide	3.019815039	3.187153065	1.163345271	0.077389719	3.938201224	8.132875288	0.297624011	0.27648555	0.126708942	1.152605178	1.187890525	1.235540405	0.319311964	0.312275502	0.195066008	0.670085573	0.933271017	2.522108851	1.12300458	3.913570249	2.677047715	3.099719299	31.33207274	3.732218932	3.898334699	1.515655078	2.804992048	3.423045352	2.918404344	2.624066268	0.022086757	0.269935668	0	1.990140438	0.974133206	0.093453806	0.623550982	0.080301935	0.047231339	0.247633835	0.070411968	0.135406344	0.84842153	0.534219382	2.665859712	0.700807672	0.417986061	1.041684038	0.176536285
Nimotuzumab	6.989260492	5.723291163	1.063114062	0.520496538	7.469638927	13.72828033	0.347794067	0.362713831	0.370777229	1.174689447	2.008467898	1.350149448	1.039957203	0.309379157	0.728737144	0.551531482	1.816069522	6.927028793	1.801167905	3.714649655	4.428234201	3.579994488	54.06309295	6.147583103	6.461529394	2.550487013	4.00758767	6.036704412	3.724993442	2.39384715	0.070984392	0.260942113	0.108027905	2.130558642	1.014055067	0.247841397	1.758501034	0.177229396	0.100437067	0.409677898	0.132676912	0.20352608	0.666351831	0.252151043	3.02148145	0.72619795	0.229910009	1.284758134	0.351597048
Nintedanib_(BIBF_1120)	3.317755011	2.67892923	0.421622917	0.245306797	3.586197049	6.206164533	0.133450615	0.198780648	0.19531322	0.449527395	0.709673839	0.563198311	0.343477935	0.155740606	0.331321723	0.369745851	0.622165341	3.133636385	0.695572689	1.817655672	1.997820233	1.557724111	24.01388924	2.620585481	2.670529673	0.894531413	1.740634065	2.520648745	1.897787226	1.295776261	0.042478954	0.229431118	0.067153022	0.7756713	0.367004298	0.137087052	0.654292183	0.088587989	0.037795117	0.188318387	0.069738118	0.085968362	0.260472569	0.135039797	1.293203402	0.277586303	0.131233155	0.472758845	0.281332372
Niraparib	3.090693917	3.577376116	0.839031668	0.30452469	4.583168516	10.79780136	0.595513465	0	0.689573508	1.734162759	2.297084743	1.899699473	0.345780882	0.060916179	0.437592242	0.185448212	1.644520731	3.890892666	2.08127913	3.91530468	4.278429386	3.191745713	45.51388962	4.138526565	6.463217635	2.686428782	4.748403786	5.175186017	3.306730104	1.51104612	0.038651824	0.192515818	0	3.385473124	1.562526057	0	1.661586418	0.482805447	0.123138224	0.234741784	0.074201336	0	1.041684038	0.230317604	3.52870113	1.041684038	0	2.1169822	0.155908949
Nivolumab_(BMS-936558)	3.9802327	3.550517569	0.381004318	0	5.008305545	3.656148008	0	0	0	0	0.462962963	0	0.124937531	0	0	0.311817898	0.830275673	3.26608467	0.484688862	1.385041551	1.890031591	0.312109863	18.47677631	3.760024659	1.838682195	0.170823369	0.622473381	0.651621314	1.4595043	1.108033499	0	0	0	0	0	0	0.440917108	0	0	0	0	0	0	0	0.763612884	0	0	0	0.311817898
Obinutuzumab	1.280489868	1.825559069	0	0.510464523	3.927196908	2.516905788	0	0	0	0	1.566670681	0	0	0	0	0	0	1.6553454	0	2.37450567	7.480208741	3.123493457	34.37061268	0	3.597411107	0.290486565	3.092473858	2.234604568	1.183167847	0	0	0.393081761	0	0	0	0.670690812	1.221001221	0	0	0	0	0	0	0	0.403551251	0.888888889	2.50483005	0	0
Ofatumumab	1.280489868	1.825559069	0	0.510464523	3.927196908	2.516905788	0	0	0	0	1.566670681	0	0	0	0	0	0	1.6553454	0	2.37450567	7.480208741	3.123493457	34.37061268	0	3.597411107	0.290486565	3.092473858	2.234604568	1.183167847	0	0	0.393081761	0	0	0	0.670690812	1.221001221	0	0	0	0	0	0	0	0.403551251	0.888888889	2.50483005	0	0
Olaparib	2.472555133	2.861900893	0.671225334	0.243619752	3.803635433	9.258580112	0.476410772	0	0.551658806	1.475513629	1.837667794	1.519759578	0.276624705	0.048732943	0.350073794	0.14835857	1.315616584	3.112714133	1.665023304	3.132243744	3.486600469	2.553396571	38.71545127	3.359412117	5.312727244	2.149143025	4.07482371	4.140148813	2.645384083	1.503786591	0.030921459	0.308025308	0	2.708378499	1.250020846	0	1.329269135	0.386244358	0.098510579	0.187793427	0.059361069	0	0.833347231	0.184254083	2.822960904	0.833347231	0	1.69358576	0.124727159
Olaratumab	9.802406017	9.461899636	1.720978381	0.862286555	11.32673598	22.91468828	0.707457133	0.641335548	0.598966912	2.354029799	3.856516456	2.725747456	1.099952447	0.543697614	1.334192861	0.713007453	3.062672706	10.63140832	2.960905146	6.867311496	7.644783543	6.30371723	91.50924685	9.671411859	11.01037711	4.678437358	7.535078457	11.24970095	6.209605451	3.933508866	0.095880672	0.49509038	0.111400786	4.414442125	2.114412694	0.595379391	3.206217607	0.267245464	0.086791399	0.762530736	0.237859046	0.330909758	1.402821258	0.45787349	5.457730262	1.505804604	0.422386219	2.615325585	0.507546854
Osimertinib	6.989260492	5.723291163	1.063114062	0.520496538	7.469638927	13.72828033	0.347794067	0.362713831	0.370777229	1.174689447	2.008467898	1.350149448	1.039957203	0.309379157	0.728737144	0.551531482	1.816069522	6.927028793	1.801167905	3.714649655	4.428234201	3.579994488	54.06309295	6.147583103	6.461529394	2.550487013	4.00758767	6.036704412	3.724993442	2.39384715	0.070984392	0.260942113	0.108027905	2.130558642	1.014055067	0.247841397	1.758501034	0.177229396	0.100437067	0.409677898	0.132676912	0.20352608	0.666351831	0.252151043	3.02148145	0.72619795	0.229910009	1.284758134	0.351597048
Paclitaxel	4.702844062	4.617488082	0.628903993	0.323438257	5.524546359	9.562093077	0.358619133	0.253463254	0.198489157	1.124407653	1.786862721	1.270842327	0.394085096	0.16312178	0.455590794	0.411596396	1.198685355	4.744822645	1.156137471	3.667356155	3.579235224	3.506665331	41.00508489	4.620119584	4.609061901	1.884525831	3.317843004	4.435180325	2.756289863	2.021416846	0.061221288	0.156405796	0.060839939	2.144746509	1.020426411	0.320182165	1.297858867	0.088134043	0.055582942	0.279692044	0.08660818	0.22032561	0.668309553	0.326469799	2.906003501	0.701867712	0.182594898	1.222704778	0.293249834
Palbociclib	3.862551087	4.315814895	0.812619057	0.227791471	4.155289879	8.112177819	0.567525058	0.244173329	0.387374319	2.287154639	1.792915243	1.858361729	0.700669816	0.218740515	0.44313295	0.297275243	3.100087122	3.545173234	0.466295858	4.153189661	3.478015866	3.027049054	31.70007735	5.130237465	3.716450533	2.119659791	2.951670761	4.21132033	2.813758027	1.52084957	0	0.205649148	0.029550827	3.197533388	1.465088532	0.10283434	0.852010683	0.018737118	0.119941735	0.194782649	0.069340952	0.142250455	1.072226886	0.03696915	3.511888388	0.985391194	0.030461807	1.844052707	0.145515019
Panitumumab	6.989260492	5.723291163	1.063114062	0.520496538	7.469638927	13.72828033	0.347794067	0.362713831	0.370777229	1.174689447	2.008467898	1.350149448	1.039957203	0.309379157	0.728737144	0.551531482	1.816069522	6.927028793	1.801167905	3.714649655	4.428234201	3.579994488	54.06309295	6.147583103	6.461529394	2.550487013	4.00758767	6.036704412	3.724993442	2.39384715	0.070984392	0.260942113	0.108027905	2.130558642	1.014055067	0.247841397	1.758501034	0.177229396	0.100437067	0.409677898	0.132676912	0.20352608	0.666351831	0.252151043	3.02148145	0.72619795	0.229910009	1.284758134	0.351597048
Panobinostat	1.747175664	2.674073924	0.886256292	0.121349189	2.151795416	6.11670089	0.65954815	0.06041875	0.108977862	2.056897358	2.039371664	2.396697474	0.180587094	0.035693698	0.092738813	0.176345607	1.679816621	1.639046457	0.429237913	4.918219513	3.139248368	3.652787112	20.58356748	3.200535892	3.220915057	2.170813547	2.90166763	3.837228801	2.709551161	0.959981939	0.040862005	0.052325643	0.010681022	3.951845297	1.895690279	0.198652349	0.755457437	0.05388613	0.101375685	0.044622979	0.054181227	0.070205881	1.434764645	0.008614409	3.723197992	1.215548874	0.02571499	2.13347234	0.039836683
Pazopanib	6.099640005	5.304625938	0.91819318	0.480487557	6.512640115	12.85009176	0.336512889	0.3689152	0.354523391	1.132479833	1.921557636	1.36003953	0.667381952	0.309897159	0.746282871	0.605734504	1.582389556	6.070915452	1.477806021	3.729112213	4.310000039	3.436249022	50.24230821	5.481247166	5.907195276	2.342614746	3.921912184	5.81235248	3.584305403	2.33110227	0.059145775	0.23710563	0.083637488	2.108556562	1.005976198	0.356034788	1.702143709	0.154707178	0.07976118	0.449182895	0.132767724	0.177508667	0.691103274	0.238068296	2.879885086	0.738157103	0.265883213	1.307120611	0.393490518
Pembrolizumab	3.9802327	3.550517569	0.381004318	0	5.008305545	3.656148008	0	0	0	0	0.462962963	0	0.124937531	0	0	0.311817898	0.830275673	3.26608467	0.484688862	1.385041551	1.890031591	0.312109863	18.47677631	3.760024659	1.838682195	0.170823369	0.622473381	0.651621314	1.4595043	1.108033499	0	0	0	0	0	0	0.440917108	0	0	0	0	0	0	0	0.763612884	0	0	0	0.311817898
Perifosine	3.481612932	2.872200259	0.481632376	0.185988654	3.479554359	6.828713446	0.187918017	0.209182992	0.195825114	0.641524567	0.842952454	0.763242771	0.339541169	0.159799951	0.294659764	0.522108673	0.529373515	3.307520787	0.645945008	2.164356687	2.145694112	1.674315887	24.19048699	3.026449645	3.332516575	1.024199733	1.900435554	2.719419484	1.871137564	1.475454884	0.042731938	0.157424247	0.055694545	1.159386321	0.558600085	0.087662543	0.611559775	0.078766334	0.03209788	0.158616005	0.095098897	0.111109127	0.372864169	0.131687438	1.834971902	0.403541798	0.125088333	0.695815508	0.415647664
Pertuzumab	8.085946281	7.391195176	1.46651753	0.546299298	9.230238605	17.38683855	0.507504845	0.560711258	0.441279861	1.75845611	2.684270344	2.090020514	0.957568032	0.465303221	0.814384567	0.686067586	2.684180682	7.935930886	2.922954618	5.252045768	5.665407624	5.061869283	67.51914242	7.424744084	8.175994355	3.185322236	5.800148114	7.965219749	4.920666439	3.087720308	0.074537088	0.493723705	0.143118851	3.233418088	1.478155009	0.558826249	2.128959783	0.194014716	0.08312407	0.534950454	0.161215657	0.271502882	1.022566751	0.351801171	4.254761965	1.132912651	0.427310093	1.868661394	0.43873525
Pomalidomide	3.524583183	3.687145268	0.564777908	0.196870558	5.090121563	8.144880167	0.340150007	0.233065515	0.210812445	0.939413776	1.487506679	1.167022426	0.307370972	0.154483811	0.3217752	0.308624981	0.880652213	3.653459823	1.261909552	3.359194675	2.877374411	2.670308907	35.63496507	3.988789368	3.868828403	1.626089292	3.194821079	3.720761812	2.305677123	1.351704825	0.034645041	0.152642716	0.038033065	1.851061232	0.876054852	0.21001879	0.976363999	0.123340237	0.018635028	0.192425203	0.114934065	0.113985405	0.654174513	0.192054215	2.40776216	0.650892415	0.222155671	1.043156265	0.221855669
Ponatinib	2.481567256	4.274357756	0.729338497	0.193250826	2.776663082	7.833885549	0.857596702	0.15315235	0.145773555	2.805670723	2.758740222	3.37084724	0.333625163	0.123553782	0.252494274	0.205162335	3.289505374	3.558599754	0.375030829	6.735817855	4.544372435	4.475278	25.72163173	4.573402669	4.336760596	3.003091549	3.542452474	5.137998315	3.605175946	0.895360035	0.027992651	0.171262885	0.045077533	5.516227321	2.581111975	0.027123895	1.147476295	0.138407752	0.253368012	0.12913258	0.047232276	0.117847047	1.722799794	0.042270385	5.188127207	1.716697277	0.021571257	2.992121022	0.137411277
Ramucirumab_(Cyramza)	8.053371992	6.922996773	1.271534438	0.764022396	8.974305199	18.59237885	0.340711193	0.493708336	0.488036847	1.216955478	2.468849316	1.494620501	0.77265866	0.406824605	1.056849214	0.754665891	2.198012537	8.627564289	2.39735867	4.818260925	5.777698711	4.616606585	74.73727208	7.192848882	8.570149287	3.132146105	5.521168885	7.713401076	4.703433194	3.205046378	0.058516623	0.32303627	0.122279286	2.164166052	1.052992386	0.31809462	2.679467068	0.224635339	0.061165558	0.696417724	0.153268008	0.257945481	0.704498086	0.366434103	3.316361552	0.782133954	0.368348437	1.384364523	0.418944153
Regorafenib	3.759992395	3.23656541	0.494081597	0.219796151	3.853227282	7.217093959	0.283729222	0.1676579	0.175371928	0.912579444	1.144151074	1.076874201	0.341405354	0.112520465	0.262996977	0.382711728	0.95181078	3.582986413	0.613371249	3.330086487	2.644044851	2.307363509	25.9237059	3.630561116	3.1387265	1.390747507	2.196478842	3.347147144	2.18410745	1.239440747	0.052773622	0.163602943	0.05825807	1.739830161	0.818461863	0.156603493	0.741864014	0.080664782	0.06475976	0.1830105	0.058968978	0.119994955	0.555035737	0.160481558	2.360861769	0.573712054	0.133372863	1.000926729	0.270443534
Ribociclib	3.862551087	4.315814895	0.812619057	0.227791471	4.155289879	8.112177819	0.567525058	0.244173329	0.387374319	2.287154639	1.792915243	1.858361729	0.700669816	0.218740515	0.44313295	0.297275243	3.100087122	3.545173234	0.466295858	4.153189661	3.478015866	3.027049054	31.70007735	5.130237465	3.716450533	2.119659791	2.951670761	4.21132033	2.813758027	1.52084957	0	0.205649148	0.029550827	3.197533388	1.465088532	0.10283434	0.852010683	0.018737118	0.119941735	0.194782649	0.069340952	0.142250455	1.072226886	0.03696915	3.511888388	0.985391194	0.030461807	1.844052707	0.145515019
Rigosertib	0.75197982	0.453520163	0.718673443	0	1.146620718	3.258522546	0.057871335	0.022918959	0.058022267	0.574885794	0.19524779	0.214665159	0.127526887	0.036455887	0.095171286	0.153970783	0.989907898	1.158700873	0.028600924	0.865162632	0.976042168	0.805904514	13.06190371	0.86505377	1.21463354	0.286988985	0.610887224	0.699029644	0.773314261	0.869951622	0.038684395	0.181524221	0.012753801	0.37616368	0.173614006	0	0.079505119	0	0.022975829	0	0.010197422	0.030807763	0.130716309	0.007449122	0.925412227	0.115742671	0.007449122	0.202549674	0.017323217
Rituximab	1.280489868	1.825559069	0	0.510464523	3.927196908	2.516905788	0	0	0	0	1.566670681	0	0	0	0	0	0	1.6553454	0	2.37450567	7.480208741	3.123493457	34.37061268	0	3.597411107	0.290486565	3.092473858	2.234604568	1.183167847	0	0	0.393081761	0	0	0	0.670690812	1.221001221	0	0	0	0	0	0	0	0.403551251	0.888888889	2.50483005	0	0
Romidepsin	1.747175664	2.674073924	0.886256292	0.121349189	2.151795416	6.11670089	0.65954815	0.06041875	0.108977862	2.056897358	2.039371664	2.396697474	0.180587094	0.035693698	0.092738813	0.176345607	1.679816621	1.639046457	0.429237913	4.918219513	3.139248368	3.652787112	20.58356748	3.200535892	3.220915057	2.170813547	2.90166763	3.837228801	2.709551161	0.959981939	0.040862005	0.052325643	0.010681022	3.951845297	1.895690279	0.198652349	0.755457437	0.05388613	0.101375685	0.044622979	0.054181227	0.070205881	1.434764645	0.008614409	3.723197992	1.215548874	0.02571499	2.13347234	0.039836683
Rucaparib	3.090693917	3.577376116	0.839031668	0.30452469	4.583168516	10.79780136	0.595513465	0	0.689573508	1.734162759	2.297084743	1.899699473	0.345780882	0.060916179	0.437592242	0.185448212	1.644520731	3.890892666	2.08127913	3.91530468	4.278429386	3.191745713	45.51388962	4.138526565	6.463217635	2.686428782	4.748403786	5.175186017	3.306730104	1.51104612	0.038651824	0.192515818	0	3.385473124	1.562526057	0	1.661586418	0.482805447	0.123138224	0.234741784	0.074201336	0	1.041684038	0.230317604	3.52870113	1.041684038	0	2.1169822	0.155908949
Ruxolitinib	3.228944449	2.186405037	0.349577207	0.088933383	2.84219131	5.296588261	0.096148069	0.127893828	0.114573311	0.318925332	0.49265661	0.347696366	0.270989495	0.095191638	0.20390972	0.452113541	0.448701947	2.788647901	0.601083829	1.688842765	1.745111903	1.413674082	20.21980075	2.018894213	1.80315684	0.686573551	1.378064349	2.09417599	1.476060896	1.03811298	0.030594885	0.112784251	0.016417126	0.522635619	0.26690586	0.133794604	0.56301386	0.049722755	0.029311991	0.178047498	0.039388604	0.067766185	0.203463542	0.169107224	1.121399127	0.193574875	0.184380212	0.29086519	0.37512307
Selumetinib	5.000233698	3.601285777	0.515226932	0.237601452	5.159046576	8.140769836	0.194105624	0.232575525	0.238795248	0.669319561	0.974931713	0.707999909	0.466697895	0.141609227	0.335486848	0.492509839	0.671769596	4.57863653	0.710653752	2.402968115	2.496258774	2.04854092	29.70209606	4.080024625	3.44006443	1.231346307	2.01149103	3.594034129	2.168232888	1.488267143	0.066816835	0.181234641	0.074196089	1.174173937	0.557513216	0.119893437	0.732209894	0.113252399	0.048222412	0.227618674	0.077631898	0.138215221	0.370682149	0.172301049	2.263827049	0.401024192	0.116619927	0.724742986	0.368601603
Siltuximab	8.469579565	8.052315939	1.435532953	0.628134291	10.39933673	19.19630063	0.445105751	0.555214939	0.46531308	1.488010716	3.161342115	1.751807737	0.690573769	0.352181761	1.019645339	0.57502807	2.671760857	8.694783601	2.918931669	6.263865421	6.404927337	6.413488714	88.96824891	7.911977976	9.824203003	3.38729956	6.839195025	8.674382191	4.813011977	3.278866382	0.070402271	0.387224958	0.061151202	2.732899661	1.286007718	0.56182335	2.693038688	0.200358469	0.069127327	0.682552407	0.141405103	0.261589614	0.873004643	0.718032709	3.777674001	0.979022972	0.50892311	1.629592628	0.390849222
Sonidegib_(LDE225)	0.126669373	1.539383738	0.035796105	0	1.62925586	5.929524075	0	0	0	0.183553598	0	0	0	0	0.469483568	0.155908949	0.181356513	3.595281762	0	0.064699793	0.844371495	0.745431238	15.13822753	0	0.456581999	0.961130713	0.977018815	0.629050074	0.19266701	0.644667502	0.154607297	0	0	0	0	0.120772947	0	0	0	0	0.651718392	0.36954915	0	0	0	0	0	0	0.155908949
Sorafenib	4.904606345	3.69514599	0.56637791	0.270356427	4.910665444	8.361022357	0.20264198	0.235374894	0.23857434	0.711382938	1.075354462	0.803420848	0.484279675	0.172940771	0.384020661	0.488292764	0.88416847	4.504621599	0.841135434	2.496717839	2.684272614	2.184528547	31.97093522	4.0007613	3.772796538	1.367908075	2.316939562	3.903253696	2.412076494	1.576917681	0.059490128	0.200016266	0.066418974	1.273355145	0.598862453	0.176975477	0.87767086	0.103095319	0.053001869	0.25412966	0.073832703	0.139069278	0.416310269	0.212062857	2.149061396	0.441045558	0.172003235	0.784152528	0.331672375
Sunitinib	6.098522404	5.279443568	0.913461977	0.465099243	6.542298577	12.59117142	0.321216848	0.368718893	0.338408691	1.081003477	1.86067094	1.303937105	0.660324645	0.295810925	0.715934393	0.58953995	1.516411116	6.002595661	1.429210603	3.731992265	4.221182911	3.416045192	49.46217248	5.482519884	5.742379919	2.251228674	3.814458688	5.701017791	3.483002944	2.283572472	0.05645733	0.226328101	0.079835784	2.012713081	0.960250007	0.345948578	1.654723698	0.147675033	0.076135672	0.459688704	0.142997316	0.177586067	0.659689489	0.254795219	2.806159369	0.712685316	0.299339977	1.247706038	0.399681136
Tamoxifen	3.911256177	4.266017333	0.87459306	0.171584094	5.21341457	8.798973861	0.530991536	0.243988394	0.244166307	1.6715916	2.049703111	2.0281972	0.436833194	0.215634877	0.25787421	0.386413438	1.06889302	3.965765308	0.751605812	4.672167926	3.560434095	3.679221918	34.26515133	5.269750025	4.427647243	2.856084353	3.81344495	4.564405134	3.530915398	1.555469167	0.073528513	0.150919485	0.026864389	3.348408892	1.529013783	0.362426279	0.849469664	0.085168719	0.073599638	0.136899336	0.098692475	0.209160629	1.12133484	0.371526308	3.710763317	1.072747593	0.183531856	1.780600149	0.263874726
Tecemotide_(Emepepimut-S_L-BLP25)	6.264090367	4.788222699	0.988792518	0.750218619	8.943793033	16.50158676	0	0.555152433	0.527575291	0.19566862	0.919105972	0.405721331	0.638976308	0.470137529	0.634333818	0.535531354	2.145222482	6.345292745	3.469627734	2.898434046	5.424640959	2.028010623	63.59388412	5.389537122	7.713478727	1.094881262	3.987819422	5.742629617	3.261732752	2.819107332	0.064732045	0	0.221631206	0.436281842	0	0.291716729	2.029541813	0.079821201	0.042933196	0.27767498	0.104892332	0.249907867	0.214856517	0.450780081	1.470238351	0.252058358	1.009517326	0.481695568	0.311817898
Temozolomide	4.8870437	7.536346839	0	0	4.141291642	18.7658286	2.083368076	0	1.984126984	7.325624286	6.851788947	7.68772879	0	0	0	0	0	1.136634031	0.122279286	15.71179267	8.598511719	10.90065232	58.96375877	8.46157543	9.220773739	6.250104229	10.88874386	7.746540428	7.774159517	2.786487683	0	1.54012654	0	13.5418925	6.250104229	0	2.083368076	0	0.985105789	0	0	0	4.166736153	0.813734246	12.03582745	4.166736153	0	7.291788268	0
Temsirolimus	2.774334792	2.784615185	0.500690354	0.173940162	3.184352897	5.838770312	0.17964772	0.240559532	0.180799154	0.612587322	0.766958217	0.797793519	0.29437152	0.214885675	0.258918682	0.398260941	0.552860862	2.896044563	0.709015424	1.999610923	1.990595543	1.468940105	22.32608851	2.846113761	3.10825768	0.960458387	1.609808021	2.525836796	1.774607221	1.553612315	0.043744407	0.161358652	0.051772489	1.129578435	0.539429599	0.092391772	0.539493635	0.101392732	0.031920368	0.150022592	0.164860912	0.132536988	0.370042281	0.191968556	1.695162532	0.398213025	0.157645662	0.660319572	0.273345681
Thalidomide	4.156997622	3.918974719	0.790344104	0.294607198	5.222628678	9.105623952	0.324293028	0.224992064	0.219440991	0.96879401	1.543656156	1.114797053	0.373293318	0.159415016	0.404324456	0.376926361	0.929962605	4.215141852	1.053362675	3.469593821	3.138555929	2.821754567	36.71278147	4.202600686	4.093334797	1.750041439	3.028429783	3.892383704	2.440467763	1.529482866	0.053199069	0.15875854	0.051055652	1.829442624	0.875454562	0.236151857	1.076259391	0.107981125	0.04215359	0.261300673	0.095801903	0.159465037	0.588759564	0.21250629	2.785504182	0.619039539	0.163865073	1.07195604	0.267018649
Tivantinib	4.868642568	4.482364505	0.829456608	0.420031754	5.989208224	11.68201492	0.248059312	0.308227025	0.289852719	0.835073337	1.489597421	0.972131489	0.529770612	0.207034148	0.540522037	0.471087618	1.477645473	5.684156786	1.282804409	3.086508864	3.5151294	2.981517172	44.12655236	4.468034804	5.028270348	1.817323766	3.232718507	4.498072069	2.884580097	2.11732279	0.099252109	0.220706855	0.102067804	1.499794588	0.750896764	0.205691571	1.306052434	0.150380511	0.058620456	0.373972391	0.114287102	0.188983123	0.504479941	0.30124338	2.206684954	0.536915007	0.248065551	0.930882127	0.328662802
Tivozanib	7.506065664	6.468774173	1.253553326	0.696091771	8.426604239	17.39280643	0.341322145	0.452926442	0.442283393	1.201835703	2.340383516	1.49254259	0.718117074	0.376299321	0.9577696	0.738798821	2.052180564	7.973404588	2.236564439	4.660054197	5.438005489	4.373178351	69.53939344	6.670604375	8.019660377	2.966946273	5.238351857	7.325744061	4.533782637	3.041645982	0.07482288	0.29275162	0.110815603	2.172867555	1.051932228	0.356477394	2.460819656	0.203575776	0.068355191	0.665720546	0.147497387	0.233763092	0.703556643	0.339062586	3.270301654	0.787803037	0.357076058	1.394292463	0.408901067
Toremifene	4.027222917	4.399330375	0.894813741	0.176946097	5.274311817	8.946277205	0.520842019	0.251613031	0.251796504	1.723828838	2.113756333	2.091578363	0.450484232	0.222373466	0.265932779	0.398488858	1.096035911	4.062952471	0.775093494	4.818173174	3.664385153	3.794197603	35.22571702	5.428169697	4.56601122	2.945336989	3.920102151	4.707042795	3.594004671	1.604077578	0.075826279	0.143122764	0.027703901	3.440533715	1.576795464	0.361239146	0.876015591	0.087830242	0.063386672	0.141177441	0.101776615	0.215696899	1.149266201	0.383136505	3.826724671	1.106270955	0.189267227	1.836243904	0.272120811
Trametinib_(Mekinst)	5.000233698	3.601285777	0.515226932	0.237601452	5.159046576	8.140769836	0.194105624	0.232575525	0.238795248	0.669319561	0.974931713	0.707999909	0.466697895	0.141609227	0.335486848	0.492509839	0.671769596	4.57863653	0.710653752	2.402968115	2.496258774	2.04854092	29.70209606	4.080024625	3.44006443	1.231346307	2.01149103	3.594034129	2.168232888	1.488267143	0.066816835	0.181234641	0.074196089	1.174173937	0.557513216	0.119893437	0.732209894	0.113252399	0.048222412	0.227618674	0.077631898	0.138215221	0.370682149	0.172301049	2.263827049	0.401024192	0.116619927	0.724742986	0.368601603
Trastuzumab	8.085946281	7.391195176	1.46651753	0.546299298	9.230238605	17.38683855	0.507504845	0.560711258	0.441279861	1.75845611	2.684270344	2.090020514	0.957568032	0.465303221	0.814384567	0.686067586	2.684180682	7.935930886	2.922954618	5.252045768	5.665407624	5.061869283	67.51914242	7.424744084	8.175994355	3.185322236	5.800148114	7.965219749	4.920666439	3.087720308	0.074537088	0.493723705	0.143118851	3.233418088	1.478155009	0.558826249	2.128959783	0.194014716	0.08312407	0.534950454	0.161215657	0.271502882	1.022566751	0.351801171	4.254761965	1.132912651	0.427310093	1.868661394	0.43873525
Trebananib	11.94407494	10.85903422	1.785309819	0.799566049	12.64696605	21.08123117	0.469692352	0.716861986	0.421804922	1.593285751	3.940421428	1.842779796	0.839269549	0.383824745	1.30950168	0.754021375	2.698843576	11.84171326	2.32086164	6.99538895	7.217349402	9.23244287	101.8067167	10.09712106	10.05909854	3.468891931	7.167816291	9.870692813	5.3867942	4.332515335	0.055216263	0.306598101	0.110815603	2.880106845	1.397234424	0.452761781	3.52143091	0.190213134	0.169600646	0.990672361	0.090891501	0.260703875	0.921081058	1.292490838	4.336995582	0.954185921	0.536741006	1.657920113	0.518736697
Vandetanib	4.914380266	3.883740996	0.713494678	0.367610149	5.092773373	9.580383876	0.224235648	0.256207455	0.263655703	0.758006479	1.302664501	0.986466674	0.692651899	0.228627854	0.497482227	0.471677338	1.173210556	4.742545367	1.212167344	2.570013641	3.062468345	2.377265705	37.27322204	4.222901945	4.546912436	1.660539845	2.684529157	4.069152784	2.735201311	1.866263391	0.045766253	0.168238994	0.087146771	1.376134957	0.653798662	0.15979248	1.18425282	0.121662552	0.07191307	0.28701971	0.113241819	0.141812104	0.43858236	0.167983605	2.056681565	0.473398452	0.161822038	0.8536833	0.283976162
Veliparib	2.529508537	4.602144031	0.950395844	0.541728032	4.048651213	12.85937885	1.041684038	0	1.324068804	3.125052115	4.594169485	3.754933497	0.322770166	0.121832359	0.797448166	0.311817898	4.652815878	4.043762763	3.403883022	6.437791917	6.327552269	5.322650831	66.40313297	4.755363075	10.16275758	4.463648546	7.82841341	9.077604667	5.149823276	1.460603941	0	0	0	6.770946249	3.125052115	0	3.323172837	0	0	0.469483568	0	0	2.083368076	0.514403292	6.031194577	2.083368076	0	3.645894134	0.311817898
Vemurafenib	7.983869785	6.368166842	0.946502796	0.339455321	8.179397645	13.76597242	0.362747954	0.431543497	0.360965525	1.233254823	1.885064634	1.378019944	0.6712741	0.308193749	0.620103787	0.586567404	1.289043241	7.842266689	1.371004022	4.105925924	4.25404433	3.648679837	51.67189494	7.271068155	6.208452829	2.296902857	3.880598215	6.408962377	3.53419432	2.567629735	0.082463342	0.44760289	0.082742317	2.216897281	1.03387688	0.256063558	1.338727244	0.172216239	0.035534533	0.41689198	0.147396295	0.279636082	0.721474355	0.344526125	3.549794241	0.750449841	0.252700519	1.312570738	0.398819774
Venetoclax	6.492633803	6.318870118	0.888738431	0.376797683	7.487280374	12.50340058	0.460805128	0.398494173	0.271389635	1.405267448	2.4947979	1.627383183	0.504985782	0.244815801	0.637280588	0.500466561	1.692785021	6.19580463	1.8217512	4.84064101	4.764548915	4.991548846	56.35413656	6.236576013	6.304236538	2.435634989	4.728311343	6.048439909	3.529402152	2.479049856	0.045150117	0.265889853	0.044326241	2.743276232	1.266628761	0.409985685	1.940492308	0.122325122	0.048511875	0.443200136	0.072639163	0.197755047	0.858343829	0.538612585	3.5175217	0.894001506	0.249274905	1.547328915	0.373797558
Vinblastine	3.310700706	2.881028466	0.431387558	0.230386705	4.114208374	7.744838705	0.279503846	0.152296363	0.186412389	0.889625291	1.120160471	0.942650722	0.299162869	0.080249805	0.276729353	0.389041662	0.849140261	3.159667373	0.8469739	3.059826891	2.665698568	2.395649994	26.07047533	3.487319336	2.962975134	1.359231863	2.144963168	2.93063114	2.136331304	1.375960485	0.058420409	0.096320744	0.066617472	1.596388694	0.74501853	0.203053466	0.703061714	0.069952216	0.049635796	0.157953542	0.100476898	0.222407384	0.562688301	0.097393848	2.324220546	0.517384672	0.101030883	0.91536848	0.242413154
Vincristine	0.427287785	0.546505921	0	0.418244406	1.385682032	3.359703976	0	0	0.066511531	0.204039634	0.032509211	0	0.084896469	0	0.134442293	0.152657633	0.1659079	1.711862979	0.036923536	0.392403693	0.971801963	0.483535776	12.6053289	0.820629591	0.648235392	0.31234705	0.236416034	0.751694379	0.626911191	1.057587625	0.032548905	0	0.186636805	0	0	0	0	0	0.086374928	0	0.161597249	0.505698837	0	0	0.684185392	0	0.019869336	0	0.032822937
Vindesine	0.427287785	0.546505921	0	0.418244406	1.385682032	3.359703976	0	0	0.066511531	0.204039634	0.032509211	0	0.084896469	0	0.134442293	0.152657633	0.1659079	1.711862979	0.036923536	0.392403693	0.971801963	0.483535776	12.6053289	0.820629591	0.648235392	0.31234705	0.236416034	0.751694379	0.626911191	1.057587625	0.032548905	0	0.186636805	0	0	0	0	0	0.086374928	0	0.161597249	0.505698837	0	0	0.684185392	0	0.019869336	0	0.032822937
Vinorelbine	0.427287785	0.546505921	0	0.418244406	1.385682032	3.359703976	0	0	0.066511531	0.204039634	0.032509211	0	0.084896469	0	0.134442293	0.152657633	0.1659079	1.711862979	0.036923536	0.392403693	0.971801963	0.483535776	12.6053289	0.820629591	0.648235392	0.31234705	0.236416034	0.751694379	0.626911191	1.057587625	0.032548905	0	0.186636805	0	0	0	0	0	0.086374928	0	0.161597249	0.505698837	0	0	0.684185392	0	0.019869336	0	0.032822937
Vismodegib	0.126669373	1.539383738	0.035796105	0	1.62925586	5.929524075	0	0	0	0.183553598	0	0	0	0	0.469483568	0.155908949	0.181356513	3.595281762	0	0.064699793	0.844371495	0.745431238	15.13822753	0	0.456581999	0.961130713	0.977018815	0.629050074	0.19266701	0.644667502	0.154607297	0	0	0	0	0.120772947	0	0	0	0	0.651718392	0.36954915	0	0	0	0	0	0	0.155908949
Vorinostat	1.747175664	2.674073924	0.886256292	0.121349189	2.151795416	6.11670089	0.65954815	0.06041875	0.108977862	2.056897358	2.039371664	2.396697474	0.180587094	0.035693698	0.092738813	0.176345607	1.679816621	1.639046457	0.429237913	4.918219513	3.139248368	3.652787112	20.58356748	3.200535892	3.220915057	2.170813547	2.90166763	3.837228801	2.709551161	0.959981939	0.040862005	0.052325643	0.010681022	3.951845297	1.895690279	0.198652349	0.755457437	0.05388613	0.101375685	0.044622979	0.054181227	0.070205881	1.434764645	0.008614409	3.723197992	1.215548874	0.02571499	2.13347234	0.039836683
[truncated: 3,751 more columns]
