# Supplementary material for: Pathway Based Analysis of Mutation Data Is Efficient for Scoring Target Cancer Drugs
Source: Front Pharmacol. 2019 Jan 23;10:1. doi: 10.3389/fphar.2019.00001 (PMC6351482; doi:10.3389/fphar.2019.00001)
Supplement: Supplementary Data Sheet 3 — Mutation drug scores for 3800 TCGA tumor samples for 10 versions of drug scoring algorithm. The dataset contains 10 tables that match the 10 methods of drug scoring. [file Data_Sheet_3.ZIP › MDS_N.csv]

	TCGA.AG.3881.01	TCGA.63.6202.01	TCGA.MH.A561.01	TCGA.DZ.6135.01	TCGA.BR.8368.01	TCGA.HU.A4GQ.01	TCGA.36.1571.01	TCGA.19.5953.01	TCGA.41.2573.01	TCGA.CZ.4865.01	TCGA.A4.A57E.01	TCGA.02.0114.01	TCGA.81.5911.01	TCGA.27.2526.01	TCGA.BP.4351.01	TCGA.B8.5159.01	TCGA.IN.8663.01	TCGA.AH.6644.01	TCGA.CM.5344.01	TCGA.AA.3685.01	TCGA.EI.6508.01	TCGA.AA.3697.01	TCGA.AA.3977.01	TCGA.AG.A02X.01	TCGA.DC.4745.01	TCGA.AA.3494.01	TCGA.85.6560.01	TCGA.A6.6782.01	TCGA.D5.6533.01	TCGA.G4.6293.01	TCGA.HT.7873.01	TCGA.DU.7294.01	TCGA.DB.A64R.01	TCGA.FG.6690.01	TCGA.DU.6542.01	TCGA.HT.8109.01	TCGA.DU.A5TW.01	TCGA.HT.7877.01	TCGA.HW.8322.01	TCGA.HT.7695.01	TCGA.DU.6393.01	TCGA.QH.A65Z.01	TCGA.HT.8106.01	TCGA.DB.A64P.01	TCGA.DB.A64X.01	TCGA.DU.5851.01	TCGA.06.6701.01	TCGA.HT.7879.01	TCGA.FG.7634.01
Abemaciclib_(LY2835219)	1.106442379	1.642392814	0.271735731	0.058432677	1.172837067	3.158617844	0.29288593	0.053705245	0.06824661	1.313713022	0.859876803	0.961774042	0.357913819	0.037057723	0.085545782	0.125321698	1.72212929	0.889607804	0.108199143	1.961567585	1.443632745	1.546684957	11.56079513	2.143022784	1.455904675	0.931863339	1.362544132	1.511421223	1.375886612	0.492155622	0	0.060078584	0.007149394	1.73659824	0.796543196	0.044937008	0.306533433	0.001274634	0.033281103	0.033684882	0.007721469	0.02728506	0.553276051	0.006608366	1.704177752	0.531629423	0.003800643	0.981684012	0.039423405
Afatinib	7.567201725	4.088303303	1.445604038	0.408657477	7.116403361	10.5581034	0.185486422	0.198451748	0.253806686	0.594185203	1.078355771	0.671710643	1.885098052	0.180256864	0.314527597	0.800036801	1.731334598	6.669185306	2.574638801	2.110223385	3.027194804	1.932322653	38.11505917	5.002181766	4.748185861	1.631315835	2.259163313	3.652140417	3.281878941	2.014837634	0.136649615	0.145800181	0.105302983	1.134136228	0.490117242	0.151948866	0.861422982	0.115196074	0.154444402	0.140648425	0.099588265	0.120460551	0.323865962	0.117619334	2.338815097	0.346093169	0.092918564	0.715958805	0.580202204
Aflibercept	2.888637194	2.213590706	0.505025958	0.177624597	2.927307906	6.436489516	0.188518968	0.175658979	0.164883805	0.624253699	0.895657524	0.824795897	0.221389715	0.131735697	0.626741617	0.73296251	0.910138851	2.467646725	0.700956201	1.876536144	2.032653616	1.569874996	23.68294711	2.358427712	2.849850237	0.998351294	1.751982754	2.639362606	2.222094253	0.98546002	0.010005	0.065531535	0.060859812	1.210237774	0.579690563	0.04856772	1.276502158	0.090781483	0.061506365	0.408439268	0.063272001	0.067987126	0.370681538	0.128074233	1.690744042	0.405527771	0.236629512	0.67506465	0.257134082
Alectinib	0.714372393	0.659464069	0.093782358	0.044247211	0.783780708	1.48128083	0.031734277	0.044396514	0.03338824	0.116204162	0.216198511	0.146859179	0.070185822	0.032220462	0.080631235	0.046263181	0.200551087	0.69557113	0.190797827	0.404419037	0.438310565	0.42123322	5.999460511	0.642349334	0.672693508	0.260238654	0.499767678	0.707288067	0.344150054	0.23676873	0.003254111	0.041863342	0.00174857	0.211767922	0.09520283	0.041483154	0.23319392	0.014678333	0.002769187	0.051419088	0.007628735	0.019017728	0.066088173	0.028725361	0.3137389	0.073552631	0.036228936	0.116521466	0.03239035
Alemtuzumab	0.010853496	0	0	0	0.063160043	0.096612876	0	0	0	0	0	0	0	0.001680514	0.021690121	0	0.013727242	0.074360386	0	0	0.039884284	0.031822218	0.336806333	0.031715422	0.03299877	0	0.041718213	0.020333627	0	0.019233127	0	0	0	0	0	0	0	0	0	0	0	0.005367687	0	0	0.010206165	0	0	0	0
Alitretinoin	0.810126448	0.282658377	0.171824302	0.016369984	0.736701448	1.475660598	0.020898341	0.014048483	0.008975344	0.153454264	0.157825774	0.080363718	0.112590489	0.007175281	0.074217249	0.09695476	0.051938066	0.592715982	0.115980865	0.663023497	0.646760894	0.351895469	8.142904699	0.611794925	0.622128247	0.183700306	0.344091026	0.375472823	0.291019975	0.567261705	0.007791621	0	0.010677601	0.137063445	0.094762636	0.0579569	0.184128327	0	0	0.020838868	0.003248707	0.073898566	0.133248529	0.093912496	0.340621729	0.046762543	0.00119186	0.082360883	0.05126194
Apalutamide_ARN-509	0.360556317	0.287212312	0.150722683	0.001664295	0.520767746	1.466632401	0.029910105	0.005945926	0.002724923	0.137883421	0.0960748	0.133520742	0.041498028	0.011798309	0.007703803	0.211619624	0.098706266	0.274693761	0.138322303	0.689095407	0.351344511	0.36150324	4.090095792	0.589972716	0.529681353	0.172762222	0.248828095	0.323549245	0.590463897	0.637386005	0.003435718	0.010323512	0	0.203459095	0.130569265	0.006528203	0.036919287	0.052047551	0.01444867	0.014659135	0.016749239	0.013023447	0.133283051	0.085857288	0.349689169	0.062090311	0.022972113	0.104685369	0.0329735
Arsenic_trioxide	2.57980065	2.871038505	0.589665461	0.124231526	2.433216745	6.176521643	0.388698611	0.086157299	0.090641198	1.578094189	1.232702635	1.345601888	0.419900798	0.065347523	0.137389926	0.31972761	2.204161064	2.056214052	0.590862231	3.132276237	2.429282984	2.554457278	22.5119585	3.397541882	2.712817277	1.461320085	2.065032195	2.577686971	2.15179854	1.12611985	0.014097246	0.120701935	0.052344513	2.43767567	1.091673643	0.240552405	0.64712203	0.017644065	0.075688998	0.093723091	0.092818497	0.24480991	0.891674385	0.051825813	2.579205722	0.753987815	0.108166943	1.400470537	0.229889215
Atezolizumab	0	0.055320076	0	0	0.031574627	0	0	0	0	0	0	0	0	0	0	0	0.036620615	0	0	0	0.052893261	0	0.344299397	0	0	0	0	0	0	0.036620615	0	0	0	0	0	0	0	0	0	0	0	0	0	0	0	0	0	0	0
Avelumab	0	0.055320076	0	0	0.031574627	0	0	0	0	0	0	0	0	0	0	0	0.036620615	0	0	0	0.052893261	0	0.344299397	0	0	0	0	0	0	0.036620615	0	0	0	0	0	0	0	0	0	0	0	0	0	0	0	0	0	0	0
Axitinib	3.342626492	1.888089665	0.43205035	0.240205072	2.978494495	6.234947756	0.06331385	0.139447861	0.1348742	0.23217883	0.48482195	0.418520788	0.267588882	0.118952713	0.288800328	0.556626818	0.45069435	2.790767171	0.620222314	1.375881532	1.703251668	1.11845401	21.44278786	2.184293301	2.305488947	0.746319078	1.269989168	2.024030553	2.099723854	1.052335914	0.017796621	0.049591658	0.046931656	0.414367	0.198377987	0.066623886	0.965663859	0.075241802	0.054428389	0.432830247	0.045914765	0.050304915	0.174021304	0.081995709	1.064060155	0.152270524	0.137279848	0.331539079	0.260794612
Belinostat	2.677200705	4.459362864	1.727301554	0.196579155	3.161558337	10.86860089	1.171863973	0.049608617	0.062265758	3.734794457	3.673054905	4.396964628	0.229654895	0.018527967	0.078917345	0.356658685	2.962070285	2.375219847	0.906972679	8.783529502	5.617075578	6.722621329	34.64776461	5.544231965	5.58248042	3.841995773	5.028780746	6.734149648	4.658760201	1.886904969	0.174228332	0.051322749	0.007035911	7.230164378	3.515996744	0.226264343	1.323756712	0.088896423	0.160792885	0.031280661	0.091734571	0.063576971	2.655933338	0.004248978	6.767527726	2.215892894	0.02016894	3.88077042	0.039030552
Bevacizumab	2.888637194	2.213590706	0.505025958	0.177624597	2.927307906	6.436489516	0.188518968	0.175658979	0.164883805	0.624253699	0.895657524	0.824795897	0.221389715	0.131735697	0.626741617	0.73296251	0.910138851	2.467646725	0.700956201	1.876536144	2.032653616	1.569874996	23.68294711	2.358427712	2.849850237	0.998351294	1.751982754	2.639362606	2.222094253	0.98546002	0.010005	0.065531535	0.060859812	1.210237774	0.579690563	0.04856772	1.276502158	0.090781483	0.061506365	0.408439268	0.063272001	0.067987126	0.370681538	0.128074233	1.690744042	0.405527771	0.236629512	0.67506465	0.257134082
Bexarotene	0.666512073	0.200644556	0.164522111	0.016369984	0.647628472	1.419692427	0.020898341	0.014048483	0.008975344	0.153454264	0.150862907	0.080363718	0.107490998	0.007175281	0.074217249	0.084227499	0.051938066	0.44686767	0.115980865	0.663023497	0.646760894	0.351895469	7.897693256	0.504084144	0.582595506	0.183700306	0.331363765	0.354765836	0.251468745	0.554534444	0.007791621	0	0.010677601	0.137063445	0.094762636	0.044269333	0.184128327	0	0	0.020838868	0.000580973	0.073898566	0.133248529	0.084793567	0.309453857	0.046762543	0.00119186	0.082360883	0.038534679
Bicalutamide	0.360556317	0.287212312	0.150722683	0.001664295	0.520767746	1.466632401	0.029910105	0.005945926	0.002724923	0.137883421	0.0960748	0.133520742	0.041498028	0.011798309	0.007703803	0.211619624	0.098706266	0.274693761	0.138322303	0.689095407	0.351344511	0.36150324	4.090095792	0.589972716	0.529681353	0.172762222	0.248828095	0.323549245	0.590463897	0.637386005	0.003435718	0.010323512	0	0.203459095	0.130569265	0.006528203	0.036919287	0.052047551	0.01444867	0.014659135	0.016749239	0.013023447	0.133283051	0.085857288	0.349689169	0.062090311	0.022972113	0.104685369	0.0329735
Binimetinib_(MEK162)	15.24250711	8.826922755	1.012349474	0.513336452	15.46708691	19.23450592	0.428614457	0.500581251	0.697206096	1.457729745	2.023615033	1.491414647	1.645705217	0.304677534	0.505601803	1.761963915	1.059801981	11.87318398	1.304559053	6.179523287	5.84371216	4.433758717	67.84124518	10.42162311	7.761539628	2.497570482	4.006438968	9.4433541	5.870248814	3.291204955	0.15279767	0.491391342	0.18066647	2.727604671	1.199660297	0.210367221	1.176311444	0.279923687	0.171762817	0.430158065	0.127216702	0.265896717	0.812220632	0.428489885	7.628232721	0.845934773	0.233044366	1.530038479	1.362163788
Blinatumomab	1.367579323	1.765138985	0.179185471	0.022203284	1.531732886	2.175242278	0.043177815	0.05531805	0.055116607	0.10054509	0.153436522	0.1375041	0.099929716	0.086106966	0.079278114	0.220440989	0.283765921	1.101545362	0.226347833	0.443390625	0.925746751	0.538801888	14.1416731	0.739024244	0.993101787	0.215110311	0.527178577	0.762287091	0.59236567	0.617393219	0.000498733	0.024713926	0.008133255	0.210940155	0.096949542	0.019358125	0.271559764	0.022037739	0	0.022425595	0.02921524	0.014244562	0.074774141	0.023779677	0.349950324	0.081862678	0.062873015	0.116225509	0.226921336
Bortezomib	0.740539297	2.09280885	0.128929263	0.039827118	2.101966487	6.539441017	0.47409101	0.144609001	0.120774189	2.185262954	1.471404116	1.71256221	0.108173456	0.119953449	0.178998027	0.327278359	1.173556202	0.577709747	0.226431595	3.081682209	2.128770881	2.134014172	25.00848379	2.618474834	3.246431714	1.532112351	3.666232879	2.206488489	1.908075916	1.011321628	0.009078055	1.400489939	0.007035911	3.078304955	1.418299324	0.018245734	0.838136836	0.048713478	0.013705024	0.0912483	0.019918146	0.06375572	0.987108806	0.038527176	2.842270531	0.973008193	0.034690206	1.639100742	0.016202365
Bosutinib	10.46707623	12.17046993	2.504682954	0.647921083	10.99225432	24.61042398	1.517300778	0.490647827	0.521956624	4.952325962	4.814404141	6.76592961	1.347527178	0.456234035	0.613787946	1.854542088	6.021583884	10.85634796	1.849805109	15.77240808	10.32909965	9.414575139	83.34101694	11.93120061	12.37048465	5.669867029	8.780734976	12.31608548	12.468818	5.518778489	0.202288118	0.814686155	0.226636041	9.479135382	4.405457191	0.262433381	2.120032563	0.377720714	0.252792132	0.436667213	0.307842659	0.303784992	2.986329514	0.422224952	10.70935858	2.946489522	0.328035387	5.155605486	1.380772833
Brentuximab_vedotin	0.173610516	0.163002291	0.018810953	0.007157481	0.23528006	0.307659054	0.007478221	0.010244865	0.004540783	0.02334426	0.040409951	0.030379796	0.021255285	0.006467354	0.006992267	0.00367596	0.025522392	0.133898147	0.02903394	0.164238504	0.114381412	0.12860862	1.401690579	0.163594509	0.114697699	0.049836515	0.097539672	0.176244366	0.073668725	0.043843832	0	0.005189992	0	0.04903908	0.022434664	0.010357856	0.040725899	0.001154237	0	0.032972669	0.000200797	0.001535532	0.016910766	0.025230323	0.080070216	0.017226543	0.047609926	0.026173775	0.001880547
Brigatinib	7.423271063	4.02073626	0.960891069	0.373746152	6.421889856	9.528948293	0.185486422	0.193850938	0.253806686	0.594185203	1.078355771	0.671710643	1.87752608	0.180256864	0.314527597	0.608940885	1.259141709	5.77134931	1.539293467	2.110223385	2.755270483	1.858694462	35.21419546	4.933665509	4.147191856	1.591287664	2.033983169	3.631521531	3.115708326	1.694923151	0.061364094	0.145800181	0.105302983	1.134136228	0.490117242	0.082243688	0.831185924	0.115196074	0.154444402	0.140648425	0.08255519	0.120460551	0.323865962	0.117619334	2.261376422	0.346093169	0.092918564	0.63567621	0.455725664
Cabazitaxel	0.118879361	0.160199253	0	0.135239244	0.568551799	1.048873724	0	0	0.019626734	0.08882903	0.01012582	0	0.020159637	0	0.028101139	0.042194922	0.044998703	0.459014213	0.011500773	0.09361196	0.269119072	0.111608124	4.692529863	0.421360437	0.212885637	0.167286151	0.106350835	0.180435408	0.225366488	0.333713587	0.006063031	0	0.04658867	0	0	0	0	0	0.024227448	0	0.032145935	0.308394888	0	0	0.226191835	0	0.004548402	0	0.007699207
Cabozantinib	4.992101874	2.909000857	1.958286292	0.657582533	4.574007423	9.476140681	0.1458512	0.184056173	0.22530439	0.423613337	0.779038212	0.85482266	0.522714508	0.169736515	0.451179415	0.845716821	0.837454893	4.160184802	0.786198892	1.907152761	2.603699687	1.89152559	31.47009219	3.205548355	3.686468917	1.049368753	2.035348595	2.735197394	2.786245522	1.850104078	0.029784872	0.394462271	0.151891889	0.777804514	0.371211578	0.091488648	1.124346392	0.114843153	0.179754239	0.373908023	0.072486682	0.070858577	0.293239781	0.197881137	1.665664561	0.285505964	0.212489656	0.531180226	0.543750859
Carfilzomib	0.565902547	0.72930874	0.128929263	0.039827118	1.951022269	4.992068215	0.098954968	0.144609001	0.120774189	1.059854828	0.34599599	0.399586063	0.108173456	0.119953449	0.178998027	0.04680749	0.090390754	0.553377413	0.226431595	0.830865957	0.67937395	0.768689412	20.0415953	0.992452389	1.914441194	0.406704225	2.353256732	0.847020656	0.764256003	1.011321628	0.009078055	1.400489939	0.007035911	0.639920682	0.279535367	0.018245734	0.206748688	0.002221793	0.013705024	0.034736389	0.019918146	0.011319771	0.236836722	0.038527176	0.612759791	0.222736109	0.034690206	0.326124595	0.016202365
Ceritinib_(Zykadia_LDK378)	0.714372393	0.659464069	0.093782358	0.044247211	0.783780708	1.48128083	0.031734277	0.044396514	0.03338824	0.116204162	0.216198511	0.146859179	0.070185822	0.032220462	0.080631235	0.046263181	0.200551087	0.69557113	0.190797827	0.404419037	0.438310565	0.42123322	5.999460511	0.642349334	0.672693508	0.260238654	0.499767678	0.707288067	0.344150054	0.23676873	0.003254111	0.041863342	0.00174857	0.211767922	0.09520283	0.041483154	0.23319392	0.014678333	0.002769187	0.051419088	0.007628735	0.019017728	0.066088173	0.028725361	0.3137389	0.073552631	0.036228936	0.116521466	0.03239035
Cetuximab	7.423271063	4.02073626	0.960891069	0.373746152	6.421889856	9.528948293	0.185486422	0.193850938	0.253806686	0.594185203	1.078355771	0.671710643	1.87752608	0.180256864	0.314527597	0.608940885	1.259141709	5.77134931	1.539293467	2.110223385	2.755270483	1.858694462	35.21419546	4.933665509	4.147191856	1.591287664	2.033983169	3.631521531	3.115708326	1.694923151	0.061364094	0.145800181	0.105302983	1.134136228	0.490117242	0.082243688	0.831185924	0.115196074	0.154444402	0.140648425	0.08255519	0.120460551	0.323865962	0.117619334	2.261376422	0.346093169	0.092918564	0.63567621	0.455725664
Cobimetinib	15.24250711	8.826922755	1.012349474	0.513336452	15.46708691	19.23450592	0.428614457	0.500581251	0.697206096	1.457729745	2.023615033	1.491414647	1.645705217	0.304677534	0.505601803	1.761963915	1.059801981	11.87318398	1.304559053	6.179523287	5.84371216	4.433758717	67.84124518	10.42162311	7.761539628	2.497570482	4.006438968	9.4433541	5.870248814	3.291204955	0.15279767	0.491391342	0.18066647	2.727604671	1.199660297	0.210367221	1.176311444	0.279923687	0.171762817	0.430158065	0.127216702	0.265896717	0.812220632	0.428489885	7.628232721	0.845934773	0.233044366	1.530038479	1.362163788
Crizotinib	3.90691626	2.988377053	1.925512951	0.638375673	4.68488986	8.455920151	0.21391705	0.183949648	0.240573821	0.621027702	0.98730798	0.973747083	0.559354359	0.136626077	0.353131182	0.505428663	0.927989448	3.776460313	0.783254822	2.289386276	2.6492099	2.015453752	29.45665109	3.397739507	3.441067617	1.568629526	2.006556186	3.086062063	1.916362981	1.556233708	0.063625301	0.156835132	0.135578718	1.141889979	0.541448732	0.111577021	0.803741183	0.107196296	0.110074224	0.236569457	0.078887463	0.119177545	0.371003848	0.154347231	1.824432268	0.391047521	0.125681288	0.654993477	0.354658561
CYT387_(Momelotinib)	7.762583253	3.085796411	0.863083357	0.087783622	4.285003136	10.32480677	0.051480237	0.100147476	0.11613282	0.155227312	0.369217344	0.197230954	0.556443994	0.066936571	0.222308206	1.589207766	0.411706052	5.720214827	1.392581186	2.036888288	3.154944576	1.650255779	34.87896911	2.030253724	2.584591497	0.88945481	2.272034477	2.956306952	3.327211413	2.136166793	0.067753545	0.07838546	0.025262311	0.200024767	0.120442963	0.179505377	1.234804099	0.052804455	0.075390698	0.153775387	0.056852871	0.05584406	0.087305595	0.169976342	1.109495627	0.088921391	0.218700146	0.115336511	1.438712255
Dabrafenib	14.44714662	8.113674832	0.817944009	0.413532692	11.75698584	15.55458314	0.303686587	0.362473569	0.549512984	1.171955234	1.630833817	1.163269608	1.369582051	0.307263419	0.46352884	1.42630059	1.220394673	10.6394092	1.000410997	4.853650134	4.750149268	3.143245221	57.89578186	9.050185354	7.481957297	1.881995807	3.319021382	9.920673708	5.62402443	3.207263515	0.127276671	0.478848005	0.161038315	1.909642018	0.891596794	0.214302642	0.957224111	0.21122092	0.118892806	0.341645905	0.138948503	0.276731839	0.651701444	0.479312242	6.007000106	0.625583923	0.262355179	1.107913896	1.048880496
Daratumumab	0.101932883	0.089956949	0.005101233	0.012578239	0.238936582	0.34833907	0	0	0.016736075	0.05198586	0.018041125	0	0.009291982	0	0.005086418	0.01577972	0.001927952	0.210383633	0.026039632	0.109996898	0.163486111	0.054370458	1.976367787	0.050170928	0.281849815	0.031771021	0.138714083	0.138383524	0.048468157	0.093639066	0.002047779	0.004416649	0.005871025	0	0	0.007535852	0.013719115	0.036788109	0	0	0	0.008777393	0	0	0.026978111	0.009987516	0.044473012	0.012760148	0.004130038
Dasatinib	17.34817425	17.43549198	2.841678957	1.015582005	16.36436989	32.80537982	1.617901618	0.779032644	0.712899706	5.30327158	5.429375907	7.170743388	1.861063174	0.717232668	0.889513467	2.811657873	6.822370972	16.79351939	2.572194838	17.36129321	14.87947274	11.39872428	117.3057663	14.73409844	15.45426722	6.765316663	10.87098134	14.6783229	15.27065861	7.738800395	0.229409625	0.927217754	0.328586154	10.27514731	4.725192522	0.371167939	3.864859146	0.458891773	0.275079512	0.533785675	0.428270285	0.389108688	3.192661315	0.445757807	11.85397057	3.234717196	0.583633809	5.600018373	2.374295135
Degarelix	0.134190058	0.1384077	0.018378264	0	0.19209252	0.250255294	0	0.010308819	0.014120326	0.011061867	0.00320667	0	0.02176165	0.012384447	0.007022952	0.012158108	0.008743606	0.165562042	0.004885192	0.039510373	0.039732266	0.051262617	1.276770556	0.166688466	0.053817004	0.019067887	0.086291962	0.101912835	0.038270054	0.050392059	0.00741064	0.001266584	0	0	0.012668392	0.014915522	0.013909849	0.011298521	0	0.002562624	0.000816243	0.007044023	0.026552939	0.005325909	0.017105994	0	0.003465292	0	0.0113264
Denileukin_diftitox_(Ontac)	4.638884219	2.141219848	0.150012081	0.150626936	2.112998115	3.985897173	0.062392642	0.037619656	0.029195734	0.173856319	0.379052044	0.174525574	0.277511262	0.041229792	0.110648532	0.333373945	0.238738345	2.770284748	0.394332476	0.908867707	2.341781765	0.794551461	18.71571867	1.196711099	1.604727791	1.085806508	1.082433717	1.262271236	1.608832803	0.622650694	0.014298802	0.033430465	0.008574653	0.296595882	0.136294544	0.091195036	1.574922799	0.018884261	0.009029717	0.084933888	0.03562235	0.022333554	0.090986151	0.066298088	0.583547406	0.109329302	0.120785493	0.193134671	0.311244998
Denosumab	0.505678117	0.449241702	0.060325093	0.049041498	0.804903942	0.825706746	0.033292208	0.037100896	0.022091805	0.034911026	0.165773526	0.044758301	0.023207084	0.008785472	0.033107911	0.044322093	0.094098724	0.557586384	0.211105668	0.343520409	0.255022795	0.395255969	4.689020059	0.470844427	0.441588575	0.089168621	0.343850753	0.37926541	0.183163628	0.227659763	0.007296104	0.008364595	0.018138507	0.071833437	0.032515477	0.012577166	0.0992546	0.002991731	0.000500679	0.0326506	0.016998131	0.003147841	0.023631308	0.093037837	0.142450092	0.033051942	0.024669538	0.044238453	0.048431502
Docetaxel	0.48656374	0.830923903	0.010516457	0.142250776	1.16172082	2.935073897	0.104633989	0.152844945	0.103855225	0.434695429	0.352334561	0.376383831	0.051651238	0.00079629	0.061995474	0.076700835	0.085354813	0.978398498	0.215240543	0.913922563	1.156139648	0.788491754	10.5874647	1.17835041	0.732640853	0.551011701	0.586865697	0.794343871	0.660302572	0.85444047	0.028598378	0	0.04658867	0.680120931	0.457474101	0.02732918	0.152804289	0	0.01334416	0.00306852	0.037846739	0.251541173	0.209267979	0.000876367	0.889016604	0.209267979	0.013401757	0.367962811	0.040919023
Dovitinib	8.492476586	6.269150685	3.728501288	0.465234287	8.749389118	14.55588279	0.199093142	0.468000215	0.408347227	0.64113348	1.129503243	1.116454468	0.875559829	0.332855377	0.759369398	1.325477473	1.447809037	7.211246065	2.050020373	4.468803726	4.81161473	3.284766693	49.64582501	6.300153565	5.416767628	1.468820082	3.392855462	5.359864947	5.153235841	3.10475615	0.050844785	0.148181856	0.10123132	1.145273268	0.541390365	0.296852365	1.267612707	0.359763034	0.189076839	0.589501651	0.103966982	0.167389139	0.452118097	0.217104635	2.54575798	0.467081294	0.353121513	0.790277503	0.968072851
Durvalumab	0.560069897	0.890122172	0.122018757	0.028071403	0.604158674	1.033650221	0.010838492	0.024192821	0.020177893	0.035719293	0.086199211	0.053437298	0.035463515	0.021826454	0.023316055	0.131120278	0.092404669	0.594441559	0.095693172	0.227325645	0.290397763	0.160134986	5.665725159	0.374940969	0.470599199	0.073543648	0.24290375	0.301857216	0.310311647	0.245979701	0.003479145	0.008462779	0.014123288	0.071333016	0.032515477	0.011822274	0.137769715	0.002060872	0	0.017060068	0.008266182	0.003147841	0.023631308	0.020900848	0.105899457	0.024896998	0.016208194	0.052500582	0.11824064
Elotuzumab	0.011179136	0.014744376	0	0	0.017355259	0.04416266	0	0.006286508	0	0	0	0.003050726	0.010066534	0	0.003016591	0	0.000906428	0.018333688	0.003331777	0	0.003121908	0.01862389	0.292660599	0.016214923	0.003314935	0.004619818	0.015566308	0.006853302	0.006763789	0.007890715	0	0.001778651	0	0	0	0	0	0	0	0	0	0	0	0	0.001812806	0.004022122	0.00849146	0	0.00634004
Enzalutamide	0.360556317	0.287212312	0.150722683	0.001664295	0.520767746	1.466632401	0.029910105	0.005945926	0.002724923	0.137883421	0.0960748	0.133520742	0.041498028	0.011798309	0.007703803	0.211619624	0.098706266	0.274693761	0.138322303	0.689095407	0.351344511	0.36150324	4.090095792	0.589972716	0.529681353	0.172762222	0.248828095	0.323549245	0.590463897	0.637386005	0.003435718	0.010323512	0	0.203459095	0.130569265	0.006528203	0.036919287	0.052047551	0.01444867	0.014659135	0.016749239	0.013023447	0.133283051	0.085857288	0.349689169	0.062090311	0.022972113	0.104685369	0.0329735
Erlotinib	7.437860232	4.02073626	0.960891069	0.373746152	6.460320564	9.606256203	0.185486422	0.193850938	0.253806686	0.594185203	1.078355771	0.671710643	1.87752608	0.180256864	0.314527597	0.616606216	1.259141709	5.807734715	1.551552763	2.16220318	2.794224678	1.913359237	35.52760888	5.017545445	4.173598225	1.603429482	2.048191751	3.631521531	3.171199287	1.723175191	0.061364094	0.145800181	0.105302983	1.134136228	0.490117242	0.082243688	0.831185924	0.115196074	0.154444402	0.140648425	0.08255519	0.120460551	0.323865962	0.158931518	2.261376422	0.346093169	0.092918564	0.63567621	0.455725664
Estramustine	1.35044464	1.641996339	0.314406386	0.031599691	2.877002569	3.708680737	0.35834708	0.049824652	0.057701437	0.968642011	1.015166695	1.137282645	0.226326524	0.041750459	0.08170536	0.2334788	0.356154281	1.775641963	0.234124367	2.407100191	1.802992618	1.738729338	13.34869475	2.820546618	1.839733761	1.719594516	1.70668155	1.684204102	1.770857284	0.617662418	0.044468706	0.051250094	0.005340511	2.005362645	0.917316058	0.271787861	0.371828298	0.047516107	0.05242264	0.011383407	0.037726166	0.09651261	0.662473235	0.113309575	2.119185928	0.605810699	0.015520952	1.055219988	0.184851929
Everolimus	3.221631645	4.073235772	0.629280254	0.16806222	3.968268119	7.255684601	0.174917123	0.508092631	0.282297869	0.676112319	0.69643306	1.326092035	0.444520456	0.369227648	0.320271414	0.835123301	0.703972198	4.125678671	1.014898385	2.197904014	2.743990855	1.369183602	29.18381285	4.067606592	4.991612868	0.951536123	1.6425541	2.893610921	3.262399552	3.324816583	0.048828615	0.086283535	0.06004277	1.133519816	0.530945788	0.143391928	0.440246419	0.264447847	0.050752388	0.147665209	0.486717125	0.148862642	0.379087055	0.25748453	2.11466453	0.375114007	0.121922348	0.637010772	0.594985731
Exemestane	0.038170497	0.007336972	0.012640627	0	0.07760503	0.490271631	0	0.097937274	0.024724368	0.012355289	0	0	0	0	0	0	0.008086689	0.083084731	0.103355974	0.020881622	0.070721509	0.02035225	1.436694529	0.026607067	0.079691513	0.099314417	0.035534502	0.019458887	0.042087542	0.05311047	0.008589294	0	0	0	0.012262566	0	0	0	0	0	0	0	0.012640627	0	0.091047221	0	0	0	0
Flavopiridol_(Alvociclib)	11.65137785	10.30049105	1.861750582	1.388587178	10.00513031	24.13224919	1.536565424	0.449904746	0.355176914	6.427610104	5.174387167	5.522057764	2.408463712	0.212897998	0.429417002	0.917732689	3.057210778	8.961064948	1.966807365	12.4204246	10.39207756	9.689016003	89.80141575	10.94632309	13.03342916	5.907891377	8.531963327	10.35993662	10.40927226	4.134070123	0.072591433	0.36670197	0.297162879	9.764167191	4.489937779	0.264332481	2.184183824	0.190122179	0.314749927	0.177741973	0.193234321	0.294408759	3.071870642	0.133186301	10.87022856	2.976832669	0.145063483	5.306517745	0.572356748
Foretinib	12.4492362	6.553335648	2.94130968	0.735586851	11.61545243	17.77523326	0.218603371	0.452686958	0.497652873	0.739569646	1.497327003	1.266773308	2.207554347	0.341776743	0.78361517	1.678875355	2.145414161	9.820753213	2.66352218	3.681506075	5.168950498	3.167955673	59.94608217	7.822810938	6.843689294	1.897424167	3.432438048	6.249230313	5.711028178	3.356785714	0.07683957	0.213961175	0.189121375	1.3677781	0.616209633	0.296852365	1.386176981	0.153047374	0.2885079	0.583742078	0.111688403	0.177905321	0.463165923	0.223475762	3.505907893	0.449218295	0.280447097	0.87100287	1.261633217
Fulvestrant	1.275142151	1.453950362	0.312048795	0.028058985	2.695146093	3.3365448	0.314335686	0.047610577	0.05698146	0.836607829	0.868465958	0.982067471	0.22340033	0.04095417	0.057945779	0.230154677	0.341858876	1.691673152	0.146809481	2.107859005	1.571941007	1.516291067	12.23120216	2.517449855	1.637004093	1.575692251	1.518649673	1.509064825	1.605416207	0.551043666	0.044468706	0.051250094	0.005340511	1.719288586	0.785281876	0.269596061	0.279646605	0.047516107	0.05242264	0.008314887	0.037726166	0.09651261	0.574450448	0.112433207	1.871306417	0.517787911	0.013410868	0.90118011	0.182813903
Ganetespib_(STA-9090)	3.128561879	4.685841923	0.411624338	0.256903232	2.527114181	7.998907549	0.847525569	0.164320756	0.143776005	2.344392996	2.347857451	3.381569268	0.451287514	0.182368249	0.849486218	1.112477626	1.62829121	2.687499799	0.529043371	6.528502959	4.56288788	3.431902532	28.26335263	4.490218314	5.757598583	2.518022279	3.363886489	3.648486563	4.990602904	2.587430106	0	0.121889024	0.035719838	5.046845462	2.32812788	0.226746252	1.114386698	0.046491685	0.116699032	0.076934383	0.258422676	0.136390911	1.546227564	0.029323945	5.438245881	1.539303533	0.039592281	2.757942786	0.328892664
Gefitinib	7.423271063	4.02073626	0.960891069	0.373746152	6.421889856	9.528948293	0.185486422	0.193850938	0.253806686	0.594185203	1.078355771	0.671710643	1.87752608	0.180256864	0.314527597	0.608940885	1.259141709	5.77134931	1.539293467	2.110223385	2.755270483	1.858694462	35.21419546	4.933665509	4.147191856	1.591287664	2.033983169	3.631521531	3.115708326	1.694923151	0.061364094	0.145800181	0.105302983	1.134136228	0.490117242	0.082243688	0.831185924	0.115196074	0.154444402	0.140648425	0.08255519	0.120460551	0.323865962	0.117619334	2.261376422	0.346093169	0.092918564	0.63567621	0.455725664
Goserelin	0.198204827	0.278018578	0.05653111	0.006759269	0.316677369	0.520546719	0.023809524	0.037541328	0.050284769	0.026727546	0.00320667	0	0.05013705	0.023484176	0.007022952	0.012158108	0.02742963	0.283184624	0.065106265	0.059297876	0.151925704	0.153146946	2.907974824	0.242651718	0.116691014	0.059902674	0.204352008	0.282927481	0.092188536	0.090789923	0.018555427	0.001266584	0	0	0.012668392	0.041994958	0.039105113	0.019946422	0	0.002562624	0.000816243	0.018048755	0.026552939	0.005325909	0.020944471	0	0.007303769	0	0.0113264
Homoharringtonine_(Omacetaxine_mepesuccinate)	0.317782136	0.016438881	0.09048967	0.016748735	0.013968603	0.721587497	0	0	0	0.007632656	0	0	0	0	0	0.009430581	0	0.01868359	0	0.206439276	0.529483639	0.005409087	3.682926254	0.159293817	0.405589148	0.004635811	0.028695849	0.06172745	0	0.278501395	0.000859436	0	0	0	0	0	0	0	0	0	0	0	0	0	0	0	0.000859436	0	0
Ibritumomab_tiuxetan	0.488887	0.256909843	0.003651095	0.005735556	0.740054441	0.750531382	0.021258858	0.008419209	0.060063165	0.063776574	0.081379615	0.074406003	0.026166139	0.008419209	0.008419209	0.175383407	0	0.42278204	0.015179972	0.247630642	0.277702482	0.158383851	2.428343448	0.272058169	0.315320857	0.073141302	0.33553877	0.281295821	0.179282613	0.191465361	0	0.004416649	0	0.138182577	0.063776574	0.007535852	0.034977973	0.005735853	0	0	0	0	0.042517716	0	0.202622005	0.052505231	0.028144158	0.074406003	0.175383407
Ibrutinib	2.384338603	1.394083987	0.134061734	0.073832951	2.777851789	2.786844315	0.050324726	0.099601616	0.137119615	0.067845584	0.257360364	0.074860259	0.142702471	0.075625382	0.123094826	0.244325844	0.193252227	1.709827106	0.340252297	0.897197058	0.80821764	1.043475536	11.81867784	1.260978288	1.052849738	0.205253358	0.812809708	0.897609679	0.628018454	0.660476484	0.003747292	0.050253726	0.027919139	0.120846426	0.052940655	0.027885686	0.265576922	0.017530779	0.020318068	0.080506927	0.021254877	0.018754173	0.045434883	0.095764187	0.370452843	0.063050989	0.051148761	0.070499248	0.238306267
Idelalisib	22.05693697	12.768358	2.600710175	0.786925637	18.78352666	37.82025711	0.655953458	1.167538468	1.090342478	1.681474954	2.87844231	1.938828365	2.134384901	0.936050365	1.465005378	7.447860064	2.584851228	21.36837545	3.8631687	8.495203039	8.673024463	6.597488117	107.3540505	13.7249094	11.96499976	2.959306486	11.58283741	10.12141392	8.911928458	10.30574972	0.246372034	0.266962967	0.28695729	3.13844191	1.46681425	0.239501566	2.099768158	0.422065792	0.345353347	0.578732081	0.235597186	0.275554702	1.017538249	0.830542164	6.221002209	1.063808228	0.512701791	1.862221008	6.782012638
Imatinib	13.06864584	14.02548991	1.673179848	0.548871286	12.0841667	22.54052473	1.481472574	0.646930194	0.478653123	4.791887803	4.966958695	5.765258134	1.257514106	0.47104222	0.593824356	1.756069607	6.432104281	12.17695283	1.65374438	14.28412368	11.744867	9.517417675	83.9948603	11.73884726	10.50861872	5.78602697	8.790281162	12.05490988	9.98958586	4.301085181	0.117330926	0.692523157	0.167974415	9.38444356	4.358906121	0.28733456	3.219719553	0.466426045	0.437040049	0.32846172	0.149196164	0.227488351	2.963201022	0.172881123	9.798643392	3.04131059	0.311570911	5.202193037	1.654111975
Inotuzumab_ozogamicin	0.221602157	0.104543814	0.025838224	0.005735556	0.242482201	0.247492932	0	0.006286508	0.003671881	0	0.017603041	0.003050726	0.01853931	0	0.003016591	0.021146271	0.000906428	0.12599796	0.003331777	0.072847891	0.117516525	0.062647191	1.179583287	0.114465883	0.095265397	0.007883712	0.095971175	0.084684854	0.047444002	0.047689028	0	0.019523934	0	0	0	0.007535852	0.013719115	0	0	0	0	0	0	0	0.058132331	0.014009637	0.036635618	0	0.027486312
Ipilimumab	0.086526798	0.265317329	0.008282703	0	0.191352029	0.277902196	0	0	0	0	0.010064412	0	0.002716033	0	0	0.076071516	0.008894317	0.140294707	0.010536714	0.091161463	0.027864328	0.006784997	1.543148725	0.081739666	0.124174662	0.003713551	0.082824896	0.014165681	0.031728354	0.116098923	0	0	0	0	0	0	0.009585155	0	0	0	0	0	0	0	0.01660028	0	0	0	0.076071516
Ixabepilone	0.118879361	0.160199253	0	0.135239244	0.568551799	1.048873724	0	0	0.019626734	0.08882903	0.01012582	0	0.020159637	0	0.028101139	0.042194922	0.044998703	0.459014213	0.011500773	0.09361196	0.269119072	0.111608124	4.692529863	0.421360437	0.212885637	0.167286151	0.106350835	0.180435408	0.225366488	0.333713587	0.006063031	0	0.04658867	0	0	0	0	0	0.024227448	0	0.032145935	0.308394888	0	0	0.226191835	0	0.004548402	0	0.007699207
Ixazomib_(MLN9708)	0.565902547	0.72930874	0.128929263	0.039827118	1.951022269	4.992068215	0.098954968	0.144609001	0.120774189	1.059854828	0.34599599	0.399586063	0.108173456	0.119953449	0.178998027	0.04680749	0.090390754	0.553377413	0.226431595	0.830865957	0.67937395	0.768689412	20.0415953	0.992452389	1.914441194	0.406704225	2.353256732	0.847020656	0.764256003	1.011321628	0.009078055	1.400489939	0.007035911	0.639920682	0.279535367	0.018245734	0.206748688	0.002221793	0.013705024	0.034736389	0.019918146	0.011319771	0.236836722	0.038527176	0.612759791	0.222736109	0.034690206	0.326124595	0.016202365
Lapatinib	7.567201725	4.088303303	1.445604038	0.408657477	7.116403361	10.5581034	0.185486422	0.198451748	0.253806686	0.594185203	1.078355771	0.671710643	1.885098052	0.180256864	0.314527597	0.800036801	1.731334598	6.669185306	2.574638801	2.110223385	3.027194804	1.932322653	38.11505917	5.002181766	4.748185861	1.631315835	2.259163313	3.652140417	3.281878941	2.014837634	0.136649615	0.145800181	0.105302983	1.134136228	0.490117242	0.151948866	0.861422982	0.115196074	0.154444402	0.140648425	0.099588265	0.120460551	0.323865962	0.117619334	2.338815097	0.346093169	0.092918564	0.715958805	0.580202204
Lenalidomide	0.505678117	0.449241702	0.060325093	0.049041498	0.804903942	0.825706746	0.033292208	0.037100896	0.022091805	0.034911026	0.165773526	0.044758301	0.023207084	0.008785472	0.033107911	0.044322093	0.094098724	0.557586384	0.211105668	0.343520409	0.255022795	0.395255969	4.689020059	0.470844427	0.441588575	0.089168621	0.343850753	0.37926541	0.183163628	0.227659763	0.007296104	0.008364595	0.018138507	0.071833437	0.032515477	0.012577166	0.0992546	0.002991731	0.000500679	0.0326506	0.016998131	0.003147841	0.023631308	0.093037837	0.142450092	0.033051942	0.024669538	0.044238453	0.048431502
Lenvatinib	8.453396855	4.783984818	0.861332927	0.702024677	7.019799233	11.17372071	0.178767939	0.259141872	0.223295183	0.600450763	1.618224212	0.823312015	0.605575507	0.212610328	1.312120261	1.049194477	1.832942373	6.382659438	1.286480324	2.630378697	3.175318483	2.220043687	38.76679568	5.849287181	4.124665626	1.347280656	2.477314987	4.333629818	3.581792765	2.686075537	0.03561911	0.462623265	0.064292786	1.145273268	0.541390365	0.217959641	1.115994551	0.123491053	0.209438183	0.478604273	0.10081529	0.12128747	0.42206108	0.169086034	2.217927367	0.396615293	0.243676755	0.74314346	0.74582207
Letrozole	0.038170497	0.007336972	0.012640627	0	0.07760503	0.490271631	0	0.097937274	0.024724368	0.012355289	0	0	0	0	0	0	0.008086689	0.083084731	0.103355974	0.020881622	0.070721509	0.02035225	1.436694529	0.026607067	0.079691513	0.099314417	0.035534502	0.019458887	0.042087542	0.05311047	0.008589294	0	0	0	0.012262566	0	0	0	0	0	0	0	0.012640627	0	0.091047221	0	0	0	0
Leuprolide	0.134190058	0.1384077	0.018378264	0	0.19209252	0.250255294	0	0.010308819	0.014120326	0.011061867	0.00320667	0	0.02176165	0.012384447	0.007022952	0.012158108	0.008743606	0.165562042	0.004885192	0.039510373	0.039732266	0.051262617	1.276770556	0.166688466	0.053817004	0.019067887	0.086291962	0.101912835	0.038270054	0.050392059	0.00741064	0.001266584	0	0	0.012668392	0.014915522	0.013909849	0.011298521	0	0.002562624	0.000816243	0.007044023	0.026552939	0.005325909	0.017105994	0	0.003465292	0	0.0113264
Lomustine	0.037305677	0.057529365	0	0	0.031612913	0.1432506	0.015903573	0	0.015146008	0.055920796	0.052303732	0.058684953	0	0	0	0	0	0.008676596	0.00093343	0.119937349	0.065637494	0.083211086	0.450105029	0.064592179	0.070387586	0.047710719	0.083120182	0.059133896	0.059344729	0.021270898	0	0.011756691	0	0.103373225	0.047710719	0	0.015903573	0	0.007519892	0	0	0	0.031807146	0.006211712	0.091876545	0.031807146	0	0.055662506	0
Masitinib	26.30455088	21.48893876	4.161811723	1.248362577	25.23488005	42.75578477	1.731314009	1.26344746	1.050464917	5.786620698	6.147606654	7.688558467	3.005819128	0.791291662	1.042743435	3.694095821	7.660532799	23.92650767	4.560474332	19.9392741	17.73483297	13.15236383	151.7228189	20.16452908	18.95921696	7.790300345	12.81589174	18.58617135	17.73230153	10.19443764	0.314325687	1.211639803	0.465768772	11.06240437	5.239983741	0.540885599	4.110900319	0.526162698	0.347533009	0.577480341	0.495173554	0.533586599	3.418270275	0.507415345	14.46570355	3.493340608	0.699185901	6.0876878	3.111837149
Medroxyprogesterone_acetate_(MPA)	1.300918269	1.519074206	0.352822903	0.028058985	3.081505647	3.54112806	0.314335686	0.047610577	0.05698146	0.848994798	0.868465958	0.982067471	0.22340033	0.043661555	0.057945779	0.234498365	0.345093552	1.86382821	0.146809481	2.130351867	1.619648611	1.790872276	13.33247559	2.571614105	1.691015262	1.596971048	1.518649673	1.540407543	1.643151681	0.582102488	0.047904424	0.051250094	0.005340511	1.719288586	0.785281876	0.269596061	0.279646605	0.047516107	0.05242264	0.008314887	0.037726166	0.09651261	0.574450448	0.112433207	2.008357366	0.517787911	0.013410868	0.90118011	0.182813903
Megestrol	0.066829723	0.065123844	0.045615199	0	0.697209315	0.493473488	0	0	0	0.012386969	0	0.003784294	0	0.002707386	0	0.022296702	0.007496814	0.331559629	0.037486837	0.109912783	0.207322218	0.509840364	2.803754186	0.444340133	0.165357935	0.159287666	0.037012007	0.031342718	0.16008159	0.097228073	0.003435718	0	0	0	0	0	0	0	0	0	0	0	0.004841091	0.079854946	0.137050949	0	0	0	0
Methyltestosterone	0.360556317	0.287212312	0.150722683	0.001664295	0.520767746	1.466632401	0.029910105	0.005945926	0.002724923	0.137883421	0.0960748	0.133520742	0.041498028	0.011798309	0.007703803	0.211619624	0.098706266	0.274693761	0.138322303	0.689095407	0.351344511	0.36150324	4.090095792	0.589972716	0.529681353	0.172762222	0.248828095	0.323549245	0.590463897	0.637386005	0.003435718	0.010323512	0	0.203459095	0.130569265	0.006528203	0.036919287	0.052047551	0.01444867	0.014659135	0.016749239	0.013023447	0.133283051	0.085857288	0.349689169	0.062090311	0.022972113	0.104685369	0.0329735
Midostaurin	0.960305272	0.955927226	0.105174039	0.052759606	1.007893578	1.778925502	0.079988881	0.057247758	0.045429092	0.258542652	0.390243526	0.309030926	0.082640782	0.050141299	0.103115404	0.064178022	0.23974429	0.896871441	0.184624002	0.74903813	0.71612819	0.646633763	7.562641882	0.975364961	0.943878735	0.406429536	0.7311659	0.939928209	0.598690086	0.322267772	0.023033984	0.07420812	0.013736821	0.520817448	0.244296285	0.12114472	0.263219573	0.054279684	0.017131415	0.06662173	0.028780835	0.04454916	0.169479894	0.051564772	0.61923145	0.193583978	0.074521785	0.297682476	0.061342027
Mogamulizumab	0.33580082	0.319220504	0.039433011	0.011530642	0.448719389	1.098774837	0.020491521	0.017120644	0.020958789	0.059096354	0.080570022	0.085016845	0.038801496	0.006467354	0.017131082	0.015084912	0.065420166	0.531353591	0.062744655	0.31553937	0.243972268	0.295098994	3.245001649	0.324190612	0.23478062	0.134970486	0.171806234	0.450212011	0.205803657	0.1681826	0.006985197	0.005189992	0	0.114776423	0.064021799	0.01529366	0.136888436	0.03188024	0	0.061384093	0.003124988	0.005885325	0.046873272	0.070091746	0.227742364	0.037453417	0.06658057	0.063666858	0.011279664
Moxetumomab_pasudotox	0.221602157	0.104543814	0.025838224	0.005735556	0.242482201	0.247492932	0	0.006286508	0.003671881	0	0.017603041	0.003050726	0.01853931	0	0.003016591	0.021146271	0.000906428	0.12599796	0.003331777	0.072847891	0.117516525	0.062647191	1.179583287	0.114465883	0.095265397	0.007883712	0.095971175	0.084684854	0.047444002	0.047689028	0	0.019523934	0	0	0	0.007535852	0.013719115	0	0	0	0	0	0	0	0.058132331	0.014009637	0.036635618	0	0.027486312
Necitumumab	7.423271063	4.02073626	0.960891069	0.373746152	6.421889856	9.528948293	0.185486422	0.193850938	0.253806686	0.594185203	1.078355771	0.671710643	1.87752608	0.180256864	0.314527597	0.608940885	1.259141709	5.77134931	1.539293467	2.110223385	2.755270483	1.858694462	35.21419546	4.933665509	4.147191856	1.591287664	2.033983169	3.631521531	3.115708326	1.694923151	0.061364094	0.145800181	0.105302983	1.134136228	0.490117242	0.082243688	0.831185924	0.115196074	0.154444402	0.140648425	0.08255519	0.120460551	0.323865962	0.117619334	2.261376422	0.346093169	0.092918564	0.63567621	0.455725664
Nilotinib	3.956381931	6.949512542	1.01277712	0.355207036	4.118071499	11.12575297	1.36436988	0.150831443	0.144029879	4.449495302	4.520667119	5.360692718	0.487647415	0.162847148	0.257254462	0.287240492	5.674369831	5.439826691	0.567189491	10.65040825	6.921575361	6.703182471	39.73729028	7.489199182	6.987168578	4.723448535	5.814315425	7.985978955	5.622438075	1.336572808	0.086505991	0.411839077	0.061905279	8.858403082	4.104618806	0.088326228	1.92244322	0.08121154	0.171679263	0.11694033	0.062949106	0.139878927	2.747992868	0.076829158	8.183252842	2.770293686	0.138600156	4.824314702	0.2372007
Nilutamide	0.360556317	0.287212312	0.150722683	0.001664295	0.520767746	1.466632401	0.029910105	0.005945926	0.002724923	0.137883421	0.0960748	0.133520742	0.041498028	0.011798309	0.007703803	0.211619624	0.098706266	0.274693761	0.138322303	0.689095407	0.351344511	0.36150324	4.090095792	0.589972716	0.529681353	0.172762222	0.248828095	0.323549245	0.590463897	0.637386005	0.003435718	0.010323512	0	0.203459095	0.130569265	0.006528203	0.036919287	0.052047551	0.01444867	0.014659135	0.016749239	0.013023447	0.133283051	0.085857288	0.349689169	0.062090311	0.022972113	0.104685369	0.0329735
Nimotuzumab	7.423271063	4.02073626	0.960891069	0.373746152	6.421889856	9.528948293	0.185486422	0.193850938	0.253806686	0.594185203	1.078355771	0.671710643	1.87752608	0.180256864	0.314527597	0.608940885	1.259141709	5.77134931	1.539293467	2.110223385	2.755270483	1.858694462	35.21419546	4.933665509	4.147191856	1.591287664	2.033983169	3.631521531	3.115708326	1.694923151	0.061364094	0.145800181	0.105302983	1.134136228	0.490117242	0.082243688	0.831185924	0.115196074	0.154444402	0.140648425	0.08255519	0.120460551	0.323865962	0.117619334	2.261376422	0.346093169	0.092918564	0.63567621	0.455725664
Nintedanib_(BIBF_1120)	18.59842258	13.20687972	2.607744126	1.185891636	17.53372422	28.20846291	0.34899923	0.848555397	0.778425907	1.127400568	2.07701828	2.251578862	1.794712343	0.709690959	1.750224625	2.978463053	2.690268313	15.11379168	3.207641428	8.279246722	9.033021256	5.666051191	102.6130828	10.77903374	10.97736052	2.649407118	6.516684516	9.266886583	11.63858058	7.917466524	0.155495442	0.723165307	0.311327245	1.820323602	0.876764852	0.51417169	2.58432669	0.492476063	0.28620316	0.840595215	0.414219208	0.282385587	0.692578744	0.497408872	4.86121763	0.706920077	0.542323184	1.14639081	2.508441354
Niraparib	0.115547974	0.236787543	0.071428115	0.013022562	0.337162123	0.697446687	0.025844975	0	0.084428241	0.08163912	0.111165474	0.088604741	0.008397991	0.001640184	0.017967037	0.009693567	0.052642302	0.118474021	0.098483731	0.18782142	0.237739156	0.200997176	2.712986778	0.257300016	0.426891411	0.100623873	0.274026063	0.233922467	0.147645659	0.084700044	0.000849491	0.011756691	0	0.157324988	0.072611533	0	0.054918691	0.041187582	0.007519892	0.006320485	0.001630799	0	0.048407689	0.010310543	0.151283852	0.048407689	0	0.130691298	0.00419789
Nivolumab_(BMS-936558)	0.086526798	0.118675222	0.008282703	0	0.132557177	0.079481478	0	0	0	0	0.010064412	0	0.002716033	0	0	0.00677865	0.045514932	0.071001841	0.010536714	0.030109599	0.080757589	0.006784997	0.659893598	0.081739666	0.039971352	0.003713551	0.01353203	0.014165681	0.031728354	0.051553146	0	0	0	0	0	0	0.009585155	0	0	0	0	0	0	0	0.01660028	0	0	0	0.00677865
Obinutuzumab	0.014387527	0.0205119	0	0.005735556	0.044125808	0.02827984	0	0	0	0	0.017603041	0	0	0	0	0	0	0.018599387	0	0.026679839	0.084047289	0.035095432	0.386186659	0	0.04042035	0.003263894	0.034746897	0.025107916	0.013294021	0	0	0.004416649	0	0	0	0.007535852	0.013719115	0	0	0	0	0	0	0	0.004534284	0.009987516	0.028144158	0	0
Ofatumumab	0.014387527	0.0205119	0	0.005735556	0.044125808	0.02827984	0	0	0	0	0.017603041	0	0	0	0	0	0	0.018599387	0	0.026679839	0.084047289	0.035095432	0.386186659	0	0.04042035	0.003263894	0.034746897	0.025107916	0.013294021	0	0	0.004416649	0	0	0	0.007535852	0.013719115	0	0	0	0	0	0	0	0.004534284	0.009987516	0.028144158	0	0
Olaparib	0.115547974	0.236787543	0.071428115	0.013022562	0.362551126	0.962057719	0.025844975	0	0.084428241	0.097969383	0.111165474	0.088604741	0.008397991	0.001640184	0.017967037	0.009693567	0.052642302	0.118474021	0.098483731	0.18782142	0.301596116	0.200997176	3.413353096	0.266298324	0.453216066	0.100623873	0.375781157	0.233922467	0.147645659	0.214671582	0.000849491	0.040277553	0	0.157324988	0.072611533	0	0.054918691	0.041187582	0.007519892	0.006320485	0.001630799	0	0.048407689	0.010310543	0.151283852	0.048407689	0	0.130691298	0.00419789
Olaratumab	2.495302607	2.012492354	0.383893998	0.226912127	2.532783	5.069432636	0.167129011	0.13673818	0.127031621	0.555582591	0.855917434	0.619145685	0.340138512	0.120613572	0.265157728	0.308701295	0.531842505	2.485832632	0.416740492	1.387096224	1.611900837	1.370870346	17.67820499	2.20112163	2.040724053	1.000105376	1.504679157	2.98210255	1.512595252	1.002228659	0.027827489	0.077519787	0.030494928	1.059911041	0.506473581	0.172350382	0.60884891	0.07563388	0.022927541	0.122705114	0.067958507	0.073670172	0.350138962	0.068623816	1.277019083	0.348776922	0.059096289	0.614218494	0.279780994
Osimertinib	7.423271063	4.02073626	0.960891069	0.373746152	6.421889856	9.528948293	0.185486422	0.193850938	0.253806686	0.594185203	1.078355771	0.671710643	1.87752608	0.180256864	0.314527597	0.608940885	1.259141709	5.77134931	1.539293467	2.110223385	2.755270483	1.858694462	35.21419546	4.933665509	4.147191856	1.591287664	2.033983169	3.631521531	3.115708326	1.694923151	0.061364094	0.145800181	0.105302983	1.134136228	0.490117242	0.082243688	0.831185924	0.115196074	0.154444402	0.140648425	0.08255519	0.120460551	0.323865962	0.117619334	2.261376422	0.346093169	0.092918564	0.63567621	0.455725664
Paclitaxel	4.091006234	3.971514139	0.432404228	0.259316409	5.000405072	7.858658284	0.293046371	0.155501755	0.146473909	0.957233593	1.222889733	1.011797758	0.340196542	0.096294417	0.232648431	0.627841353	0.740630934	3.922694031	1.225466957	3.167837313	3.012114281	2.168404127	33.74863526	3.957341363	3.658235768	1.511231602	2.560294862	2.969097349	2.303114646	1.920904242	0.053087998	0.091575626	0.056928712	1.735478915	0.840372574	0.303029276	0.792734887	0.06156165	0.078154033	0.113491372	0.080071631	0.388927008	0.534658679	0.127278536	2.892071202	0.552825644	0.108193045	0.976211214	0.499746501
Palbociclib	1.106442379	1.642392814	0.271735731	0.058432677	1.172837067	3.158617844	0.29288593	0.053705245	0.06824661	1.313713022	0.859876803	0.961774042	0.357913819	0.037057723	0.085545782	0.125321698	1.72212929	0.889607804	0.108199143	1.961567585	1.443632745	1.546684957	11.56079513	2.143022784	1.455904675	0.931863339	1.362544132	1.511421223	1.375886612	0.492155622	0	0.060078584	0.007149394	1.73659824	0.796543196	0.044937008	0.306533433	0.001274634	0.033281103	0.033684882	0.007721469	0.02728506	0.553276051	0.006608366	1.704177752	0.531629423	0.003800643	0.981684012	0.039423405
Panitumumab	7.423271063	4.02073626	0.960891069	0.373746152	6.421889856	9.528948293	0.185486422	0.193850938	0.253806686	0.594185203	1.078355771	0.671710643	1.87752608	0.180256864	0.314527597	0.608940885	1.259141709	5.77134931	1.539293467	2.110223385	2.755270483	1.858694462	35.21419546	4.933665509	4.147191856	1.591287664	2.033983169	3.631521531	3.115708326	1.694923151	0.061364094	0.145800181	0.105302983	1.134136228	0.490117242	0.082243688	0.831185924	0.115196074	0.154444402	0.140648425	0.08255519	0.120460551	0.323865962	0.117619334	2.261376422	0.346093169	0.092918564	0.63567621	0.455725664
Panobinostat	2.677200705	4.459362864	1.727301554	0.196579155	3.161558337	10.86860089	1.171863973	0.049608617	0.062265758	3.734794457	3.673054905	4.396964628	0.229654895	0.018527967	0.078917345	0.356658685	2.962070285	2.375219847	0.906972679	8.783529502	5.617075578	6.722621329	34.64776461	5.544231965	5.58248042	3.841995773	5.028780746	6.734149648	4.658760201	1.886904969	0.174228332	0.051322749	0.007035911	7.230164378	3.515996744	0.226264343	1.323756712	0.088896423	0.160792885	0.031280661	0.091734571	0.063576971	2.655933338	0.004248978	6.767527726	2.215892894	0.02016894	3.88077042	0.039030552
Pazopanib	6.221670164	4.077808744	0.711012994	0.316477991	5.407428945	10.05860881	0.178767939	0.337561501	0.318882306	0.622820543	1.085275271	0.854666115	0.720576817	0.296844238	0.562097436	0.983617067	0.904512198	5.154806488	0.757814096	2.380986478	3.369078154	2.171040551	34.24837237	4.377211661	3.688377694	1.275182161	2.320937781	4.380690607	3.399954979	1.953894224	0.043160929	0.145680781	0.064292786	1.145273268	0.541390365	0.28766482	1.183867835	0.123491053	0.136003388	0.485355967	0.091543669	0.093682225	0.431114106	0.11563718	2.143041907	0.396615293	0.207786617	0.776803501	0.680244661
Pembrolizumab	0.086526798	0.118675222	0.008282703	0	0.132557177	0.079481478	0	0	0	0	0.010064412	0	0.002716033	0	0	0.00677865	0.045514932	0.071001841	0.010536714	0.030109599	0.080757589	0.006784997	0.659893598	0.081739666	0.039971352	0.003713551	0.01353203	0.014165681	0.031728354	0.051553146	0	0	0	0	0	0	0.009585155	0	0	0	0	0	0	0	0.01660028	0	0	0	0.00677865
Perifosine	13.89405384	10.71580727	1.699582599	0.455968388	11.25783667	25.24728025	0.771072092	0.836182098	0.670461676	2.576237784	2.994093135	3.519432375	1.378569712	0.640828927	1.042456971	3.475316439	1.19436508	12.26145539	1.855047957	8.678591812	7.460997937	5.510134102	81.42592186	10.0869499	14.54740051	3.202443168	7.215823587	8.60148711	8.162886107	7.438233917	0.100346102	0.267503956	0.171966413	4.819670222	2.250782395	0.242707328	1.60645288	0.188684391	0.130780861	0.36358724	0.493524748	0.266454883	1.518437682	0.508259004	7.852436248	1.567672211	0.338328224	2.749502748	2.976315534
Pertuzumab	3.181863458	1.929482871	1.065377711	0.148614161	3.435468524	4.769017926	0.111236429	0.093132983	0.069588214	0.38139293	0.512350275	0.423612862	0.516206286	0.074639214	0.121873014	0.406904371	1.235373582	3.434845406	2.093215028	1.055571234	1.404864801	1.005729421	16.80490294	2.294766512	2.550006778	0.607636908	1.212363325	1.603959664	1.418910132	1.113979565	0.090527884	0.069791471	0.076338539	0.708661778	0.331616311	0.136053095	0.395986413	0.062927584	0.028567087	0.072591114	0.060540658	0.061175695	0.226855302	0.04717516	1.170863663	0.238893002	0.064036538	0.478600359	0.293880695
Pomalidomide	2.531512791	2.450030332	0.468308273	0.079295747	4.855610822	5.146203916	0.228379793	0.103183827	0.161351624	0.572687788	1.137980096	0.740572293	0.192643009	0.045672921	0.118716278	0.241837463	0.380654012	2.610363482	0.874849017	2.967126284	1.810674962	2.251308795	29.53227808	2.806846645	2.080409046	0.907711077	2.81668452	2.373940561	1.537702021	0.659472026	0.033624448	0.071209879	0.032355271	1.134165817	0.578542889	0.220507295	0.470064104	0.100760001	0.008897832	0.050406645	0.078115518	0.04381862	0.395752182	0.06028576	1.865646866	0.396180718	0.125837273	0.633101901	0.184450308
Ponatinib	2.219548369	5.407588301	0.843114576	0.185080131	2.316207722	8.965158782	1.281599912	0.212124971	0.121808753	4.177376708	3.940532823	5.045420689	0.379936981	0.132777018	0.170571206	0.261026723	5.535356346	3.778253473	0.25194039	9.922200083	5.833944587	6.135931888	29.35028261	5.868863469	5.521554265	4.121092749	4.959079486	6.69286671	4.941311571	0.998632631	0.066688607	0.282098173	0.041128938	8.317302221	3.847379265	0.006562908	1.440577303	0.0962874	0.355371104	0.064594901	0.027124378	0.138813726	2.571715338	0.024812822	7.395389447	2.57459515	0.010468392	4.511289538	0.210080945
Ramucirumab_(Cyramza)	3.009237567	1.757864258	0.309814666	0.238883427	2.617835565	5.598089493	0.051674922	0.10904324	0.1348742	0.196792979	0.444735766	0.313551956	0.240591113	0.114724814	0.288800328	0.482069507	0.387813813	2.572765265	0.442377128	1.109200189	1.566422754	0.952147366	19.59314033	2.075316028	2.075628936	0.690422961	1.134115087	1.808240868	1.746317944	0.883530051	0.010005	0.049591658	0.046931656	0.338713969	0.163461204	0.042238046	0.954024931	0.075241802	0.044697449	0.278371257	0.038998065	0.050304915	0.150743448	0.079499466	0.892499105	0.124026808	0.114724419	0.281586144	0.205031456
Regorafenib	25.23060733	18.91728955	2.573130934	1.059067178	21.51543001	39.54418942	1.83963033	0.648969807	0.836729259	5.848221048	6.44311412	7.089211177	2.06958077	0.503934641	1.170388714	2.960063161	6.645065582	20.4659129	2.510004814	24.75578848	15.6229509	12.9472253	127.3125264	22.45109487	16.4191316	7.4692704	11.23307119	19.71424992	14.30219907	6.737033307	0.281134877	0.966306149	0.266108948	11.45619317	5.343787507	0.745763537	3.442718127	0.344312046	0.633159719	0.881780364	0.240437303	0.614580727	3.641010356	0.815411411	16.35853962	3.616077011	0.631067212	6.350695248	2.177334255
Ribociclib	1.106442379	1.642392814	0.271735731	0.058432677	1.172837067	3.158617844	0.29288593	0.053705245	0.06824661	1.313713022	0.859876803	0.961774042	0.357913819	0.037057723	0.085545782	0.125321698	1.72212929	0.889607804	0.108199143	1.961567585	1.443632745	1.546684957	11.56079513	2.143022784	1.455904675	0.931863339	1.362544132	1.511421223	1.375886612	0.492155622	0	0.060078584	0.007149394	1.73659824	0.796543196	0.044937008	0.306533433	0.001274634	0.033281103	0.033684882	0.007721469	0.02728506	0.553276051	0.006608366	1.704177752	0.531629423	0.003800643	0.981684012	0.039423405
Rigosertib	0.444123651	0.198646263	0.350373081	0	0.59345442	2.40899731	0.017655662	0.006992225	0.026618958	0.320577823	0.059567122	0.065491065	0.066445217	0.011764566	0.047379519	0.079650749	1.420090109	1.288761971	0.009568972	0.448949756	0.651957176	0.654680494	9.535573557	0.347749021	1.000891995	0.135415327	0.311317488	0.343518694	0.74861593	0.679884855	0.063825596	0.224628275	0.011478421	0.114761801	0.052966985	0	0.024255799	0	0.010883288	0	0.005398635	0.026406654	0.039879552	0.002272614	0.442379251	0.035311323	0.002272614	0.061794816	0.005285049
Rituximab	0.014387527	0.0205119	0	0.005735556	0.044125808	0.02827984	0	0	0	0	0.017603041	0	0	0	0	0	0	0.018599387	0	0.026679839	0.084047289	0.035095432	0.386186659	0	0.04042035	0.003263894	0.034746897	0.025107916	0.013294021	0	0	0.004416649	0	0	0	0.007535852	0.013719115	0	0	0	0	0	0	0	0.004534284	0.009987516	0.028144158	0	0
Romidepsin	2.677200705	4.459362864	1.727301554	0.196579155	3.161558337	10.86860089	1.171863973	0.049608617	0.062265758	3.734794457	3.673054905	4.396964628	0.229654895	0.018527967	0.078917345	0.356658685	2.962070285	2.375219847	0.906972679	8.783529502	5.617075578	6.722621329	34.64776461	5.544231965	5.58248042	3.841995773	5.028780746	6.734149648	4.658760201	1.886904969	0.174228332	0.051322749	0.007035911	7.230164378	3.515996744	0.226264343	1.323756712	0.088896423	0.160792885	0.031280661	0.091734571	0.063576971	2.655933338	0.004248978	6.767527726	2.215892894	0.02016894	3.88077042	0.039030552
Rucaparib	0.115547974	0.236787543	0.071428115	0.013022562	0.337162123	0.697446687	0.025844975	0	0.084428241	0.08163912	0.111165474	0.088604741	0.008397991	0.001640184	0.017967037	0.009693567	0.052642302	0.118474021	0.098483731	0.18782142	0.237739156	0.200997176	2.712986778	0.257300016	0.426891411	0.100623873	0.274026063	0.233922467	0.147645659	0.084700044	0.000849491	0.011756691	0	0.157324988	0.072611533	0	0.054918691	0.041187582	0.007519892	0.006320485	0.001630799	0	0.048407689	0.010310543	0.151283852	0.048407689	0	0.130691298	0.00419789
Ruxolitinib	7.762583253	3.085796411	0.863083357	0.087783622	4.285003136	10.32480677	0.051480237	0.100147476	0.11613282	0.155227312	0.369217344	0.197230954	0.556443994	0.066936571	0.222308206	1.589207766	0.411706052	5.720214827	1.392581186	2.036888288	3.154944576	1.650255779	34.87896911	2.030253724	2.584591497	0.88945481	2.272034477	2.956306952	3.327211413	2.136166793	0.067753545	0.07838546	0.025262311	0.200024767	0.120442963	0.179505377	1.234804099	0.052804455	0.075390698	0.153775387	0.056852871	0.05584406	0.087305595	0.169976342	1.109495627	0.088921391	0.218700146	0.115336511	1.438712255
Selumetinib	15.24250711	8.826922755	1.012349474	0.513336452	15.46708691	19.23450592	0.428614457	0.500581251	0.697206096	1.457729745	2.023615033	1.491414647	1.645705217	0.304677534	0.505601803	1.761963915	1.059801981	11.87318398	1.304559053	6.179523287	5.84371216	4.433758717	67.84124518	10.42162311	7.761539628	2.497570482	4.006438968	9.4433541	5.870248814	3.291204955	0.15279767	0.491391342	0.18066647	2.727604671	1.199660297	0.210367221	1.176311444	0.279923687	0.171762817	0.430158065	0.127216702	0.265896717	0.812220632	0.428489885	7.628232721	0.845934773	0.233044366	1.530038479	1.362163788
Siltuximab	1.909402515	1.573646937	0.364196612	0.111155004	2.205635821	3.987636383	0.090662873	0.098213587	0.073619246	0.31312244	0.760079246	0.357619284	0.162165784	0.052281765	0.159342136	0.163341613	0.985707383	1.656884134	0.627429647	1.660440734	1.29866853	1.399227034	20.50549977	1.566275194	1.912154394	0.635480085	1.318995297	1.503428946	1.143002296	0.618476673	0.01232783	0.062927722	0.023047462	0.568565087	0.283504115	0.176255738	0.474295806	0.0418708	0.030874731	0.112163024	0.034310121	0.041958408	0.190887417	0.137223685	0.854874643	0.196350333	0.10347819	0.325929836	0.131698552
Sonidegib_(LDE225)	0.004967426	0.06036799	0.008916246	0	0.119535139	0.492912731	0	0	0	0.00719818	0	0	0	0	0.01841112	0.029696943	0.014624497	0.234599623	0	0.01232377	0.033112608	0.039019121	1.223372036	0	0.044111085	0.0618555	0.203702655	0.032181108	0.036698478	0.048863945	0.006063031	0	0	0	0	0.023004371	0	0	0	0	0.025557584	0.014492124	0	0	0	0	0	0	0.029696943
Sorafenib	17.35447139	9.860778647	1.458368425	0.615345073	15.0237172	21.7313732	0.349381771	0.564199394	0.695313315	1.362176838	1.996608715	1.5190565	1.789738206	0.487952921	0.842026368	2.092703105	2.047145215	13.30476741	1.935121182	5.904529208	6.41705294	4.383224448	77.77390502	10.74260392	9.383409697	2.546569801	4.439058213	11.33903529	7.769517087	4.341983216	0.14387571	0.623682903	0.172884428	2.218579172	1.028682345	0.333379091	1.665554462	0.255380671	0.285444534	0.711214456	0.176379074	0.337063844	0.791736073	0.586769157	6.692006079	0.745240476	0.405589591	1.394577849	1.473093214
Sunitinib	6.503214249	4.313907243	0.966762322	0.337944452	5.694961211	10.46023439	0.178767939	0.350978204	0.318882306	0.622820543	1.108069301	0.903045409	0.739776032	0.296844238	0.567482118	0.997881453	0.909032123	5.340460441	0.776267442	2.530301071	3.506793788	2.262758378	35.79126347	4.610465222	3.824702409	1.289728735	2.386492078	4.51878878	3.465662234	2.012132999	0.043160929	0.145680781	0.064292786	1.145273268	0.541390365	0.296852365	1.208558005	0.123491053	0.136003388	0.508853311	0.108548787	0.105956983	0.431114106	0.128642773	2.196221151	0.404770237	0.242392485	0.776803501	0.707363624
Tamoxifen	1.275142151	1.453950362	0.312048795	0.028058985	2.695146093	3.3365448	0.314335686	0.047610577	0.05698146	0.836607829	0.868465958	0.982067471	0.22340033	0.04095417	0.057945779	0.230154677	0.341858876	1.691673152	0.146809481	2.107859005	1.571941007	1.516291067	12.23120216	2.517449855	1.637004093	1.575692251	1.518649673	1.509064825	1.605416207	0.551043666	0.044468706	0.051250094	0.005340511	1.719288586	0.785281876	0.269596061	0.279646605	0.047516107	0.05242264	0.008314887	0.037726166	0.09651261	0.574450448	0.112433207	1.871306417	0.517787911	0.013410868	0.90118011	0.182813903
Tecemotide_(Emepepimut-S_L-BLP25)	0.189447071	0.13339426	0.019479265	0.005918885	0.205452364	0.233452212	0	0.008577336	0.005786786	0.001543737	0.026737289	0.003200957	0.011643496	0.005369467	0.008325196	0.00882342	0.036313384	0.195678243	0.04611474	0.073780665	0.158022301	0.025841971	1.348056675	0.118208327	0.167909588	0.012605493	0.093961625	0.112129896	0.101299497	0.05362015	0.000510706	0	0.00174857	0.040031214	0	0.002301513	0.07993515	0.000629753	0.000338723	0.00219073	0.000827553	0.00197166	0.019913321	0.038884995	0.037388884	0.001988626	0.039972589	0.00380036	0.007058423
Temozolomide	0.037305677	0.057529365	0	0	0.031612913	0.1432506	0.015903573	0	0.015146008	0.055920796	0.052303732	0.058684953	0	0	0	0	0	0.008676596	0.00093343	0.119937349	0.065637494	0.083211086	0.450105029	0.064592179	0.070387586	0.047710719	0.083120182	0.059133896	0.059344729	0.021270898	0	0.011756691	0	0.103373225	0.047710719	0	0.015903573	0	0.007519892	0	0	0	0.031807146	0.006211712	0.091876545	0.031807146	0	0.055662506	0
Temsirolimus	3.221631645	4.073235772	0.629280254	0.16806222	3.968268119	7.255684601	0.174917123	0.508092631	0.282297869	0.676112319	0.69643306	1.326092035	0.444520456	0.369227648	0.320271414	0.835123301	0.703972198	4.125678671	1.014898385	2.197904014	2.743990855	1.369183602	29.18381285	4.067606592	4.991612868	0.951536123	1.6425541	2.893610921	3.262399552	3.324816583	0.048828615	0.086283535	0.06004277	1.133519816	0.530945788	0.143391928	0.440246419	0.264447847	0.050752388	0.147665209	0.486717125	0.148862642	0.379087055	0.25748453	2.11466453	0.375114007	0.121922348	0.637010772	0.594985731
Thalidomide	6.692190211	6.145586644	1.992705462	0.400985773	9.371821807	14.49583471	0.606515446	0.269482446	0.357505479	1.719575147	2.57382074	1.990087618	0.575276915	0.211323508	0.512028662	0.841446216	0.964427219	5.929618236	1.362293308	7.539656782	4.698814913	4.715576017	58.39992822	6.721877742	5.285406319	2.545043315	5.249234684	5.367253852	3.866420925	1.959159779	0.072604829	0.165847472	0.116871294	3.295867276	1.564547273	0.320394366	1.201775912	0.137806338	0.076896056	0.203784404	0.137518192	0.235774166	1.04390378	0.186064587	6.468950844	1.077055775	0.164563799	1.877924455	0.630968427
Tivantinib	5.506849585	4.449097164	2.086363455	0.748890014	7.107515582	17.21300995	0.212385887	0.276733986	0.278559682	0.670910851	1.247945116	1.081845374	0.687414132	0.17358042	0.41645068	1.285938466	1.519502391	7.700575522	1.280938116	3.414189494	3.902287641	2.750765349	49.03768545	4.279027158	5.293744866	1.586993583	3.016986308	4.152581635	4.113166063	2.982810568	0.138730017	0.186504306	0.180029592	1.208260263	0.609318022	0.131014302	1.324011141	0.161738825	0.170297867	0.527793939	0.166552586	0.271511152	0.40293978	0.232826374	2.377897192	0.451316063	0.194361091	0.755603035	0.930916295
Tivozanib	3.342626492	1.888089665	0.43205035	0.240205072	2.978494495	6.234947756	0.06331385	0.139447861	0.1348742	0.23217883	0.48482195	0.418520788	0.267588882	0.118952713	0.288800328	0.556626818	0.45069435	2.790767171	0.620222314	1.375881532	1.703251668	1.11845401	21.44278786	2.184293301	2.305488947	0.746319078	1.269989168	2.024030553	2.099723854	1.052335914	0.017796621	0.049591658	0.046931656	0.414367	0.198377987	0.066623886	0.965663859	0.075241802	0.054428389	0.432830247	0.045914765	0.050304915	0.174021304	0.081995709	1.064060155	0.152270524	0.137279848	0.331539079	0.260794612
Toremifene	1.26178745	1.453950362	0.296880043	0.028058985	2.477499249	3.064193676	0.257283949	0.047610577	0.05698146	0.836607829	0.868465958	0.982067471	0.22340033	0.04095417	0.057945779	0.230154677	0.328504175	1.634621415	0.146809481	2.107859005	1.556340991	1.516291067	11.99606554	2.504095154	1.637004093	1.575692251	1.49195537	1.509064825	1.504612296	0.551043666	0.044468706	0.024555791	0.005340511	1.692594282	0.785281876	0.242901758	0.279646605	0.047516107	0.025728337	0.008314887	0.037726166	0.09651261	0.559281696	0.112433207	1.871306417	0.517787911	0.013410868	0.90118011	0.182813903
Trametinib_(Mekinst)	15.24250711	8.826922755	1.012349474	0.513336452	15.46708691	19.23450592	0.428614457	0.500581251	0.697206096	1.457729745	2.023615033	1.491414647	1.645705217	0.304677534	0.505601803	1.761963915	1.059801981	11.87318398	1.304559053	6.179523287	5.84371216	4.433758717	67.84124518	10.42162311	7.761539628	2.497570482	4.006438968	9.4433541	5.870248814	3.291204955	0.15279767	0.491391342	0.18066647	2.727604671	1.199660297	0.210367221	1.176311444	0.279923687	0.171762817	0.430158065	0.127216702	0.265896717	0.812220632	0.428489885	7.628232721	0.845934773	0.233044366	1.530038479	1.362163788
Trastuzumab	3.181863458	1.929482871	1.065377711	0.148614161	3.435468524	4.769017926	0.111236429	0.093132983	0.069588214	0.38139293	0.512350275	0.423612862	0.516206286	0.074639214	0.121873014	0.406904371	1.235373582	3.434845406	2.093215028	1.055571234	1.404864801	1.005729421	16.80490294	2.294766512	2.550006778	0.607636908	1.212363325	1.603959664	1.418910132	1.113979565	0.090527884	0.069791471	0.076338539	0.708661778	0.331616311	0.136053095	0.395986413	0.062927584	0.028567087	0.072591114	0.060540658	0.061175695	0.226855302	0.04717516	1.170863663	0.238893002	0.064036538	0.478600359	0.293880695
Trebananib	1.686247699	1.159168955	0.171592965	0.065578487	1.328811985	1.942593312	0.030962109	0.051012334	0.027876294	0.111966157	0.294413412	0.126445761	0.101025964	0.028778426	0.130243474	0.141573756	0.204888047	1.351001173	0.159199808	0.649286625	0.594004347	0.781760942	9.286938045	1.091039057	0.82171484	0.270455242	0.611244996	0.762680482	0.589570103	0.449900336	0.005057885	0.020739283	0.01044923	0.178807585	0.090957035	0.029406527	0.325980682	0.013884853	0.059062844	0.076650478	0.009511507	0.019648198	0.055766921	0.103192251	0.420805457	0.05703261	0.037146011	0.104221335	0.111472437
Vandetanib	9.105864742	4.799827892	1.066973451	0.425888968	7.558699295	12.31519656	0.185486422	0.272012442	0.337387229	0.597664452	1.11208429	1.455831296	1.958388617	0.303362865	0.439822981	1.063421151	1.263946182	7.008944492	1.643307703	2.541848257	3.68263875	2.081658246	45.96672273	5.864673095	6.172722054	1.661056287	2.381423088	4.260486268	5.043738313	3.472991884	0.061364094	0.145800181	0.13376033	1.143845424	0.490117242	0.082243688	1.231987567	0.153047374	0.192281272	0.303418177	0.280998972	0.171481631	0.372510224	0.142353854	2.737834109	0.35570031	0.157610577	0.712216819	0.641878455
Veliparib	0.020155447	0.03667047	0.007572875	0.004316558	0.087206482	0.188854407	0.008300271	0	0.062770521	0.024900814	0.052442648	0.029919789	0.002571874	0.000970776	0.006354169	0.002484605	0.03707423	0.032221217	0.027122574	0.051297147	0.050418743	0.088654091	0.886946235	0.037891339	0.090514005	0.035566921	0.071913654	0.077417302	0.041034448	0.019310328	0	0	0	0.053951763	0.024900814	0	0.026479465	0	0	0.003740905	0	0	0.016600542	0.004098831	0.048057327	0.016600542	0	0.029050949	0.002484605
Vemurafenib	6.870101741	4.456903565	0.456132181	0.145224079	5.816626314	7.367551807	0.188894509	0.227555782	0.239969166	0.658487938	1.087369152	0.716478293	0.476641907	0.168429393	0.292633287	0.421253155	0.498264945	5.82105289	0.466347945	2.262322645	2.231981155	1.731840685	26.5104584	5.599185709	3.316649497	1.003860505	1.675078322	4.035177751	1.824456081	1.386902579	0.036182014	0.428170342	0.065668795	1.163968986	0.532673698	0.080682274	0.522528856	0.064712898	0.016355793	0.135602101	0.076159176	0.195113519	0.369257308	0.123767358	2.732286264	0.367466943	0.089841195	0.662262689	0.308340062
Venetoclax	2.753098588	2.570121198	0.301314316	0.10869667	3.355697456	4.59779457	0.170995813	0.134766566	0.098936685	0.524878529	0.83953388	0.578855696	0.209803017	0.077474778	0.168927753	0.370684525	0.487640684	2.514110611	1.124719593	1.871821562	1.949333119	1.416099353	21.30447457	2.413202524	2.355770083	0.87910615	1.766318497	1.958287922	1.30167994	0.920935693	0.014698156	0.091575626	0.010340041	1.010271607	0.473741037	0.263502557	0.622990827	0.026451756	0.040924569	0.103242539	0.027210982	0.073079449	0.311517969	0.1115752	1.505862547	0.31779657	0.067637677	0.57069217	0.311611505
Vinblastine	7.209313785	5.574884608	0.890198736	0.41691066	8.87834713	17.38389684	0.697292777	0.208797926	0.362072021	2.222626262	2.377160995	2.377848096	0.72882499	0.07730125	0.549699574	1.189091125	2.119761291	6.215148511	1.728579642	8.568359522	6.050743877	5.567378111	52.35649858	7.722604729	5.848603047	2.763328275	4.494200226	5.791733998	5.059354849	2.549327992	0.118619477	0.149866856	0.120816424	4.088198516	1.947288207	0.406535549	1.215833221	0.084157976	0.131052127	0.184592626	0.223910273	0.677054948	1.39021186	0.142009057	6.154463001	1.288221558	0.171557697	2.256258715	0.671660054
Vincristine	0.118879361	0.160199253	0	0.135239244	0.568551799	1.048873724	0	0	0.019626734	0.08882903	0.01012582	0	0.020159637	0	0.028101139	0.042194922	0.044998703	0.459014213	0.011500773	0.09361196	0.269119072	0.111608124	4.692529863	0.421360437	0.212885637	0.167286151	0.106350835	0.180435408	0.225366488	0.333713587	0.006063031	0	0.04658867	0	0	0	0	0	0.024227448	0	0.032145935	0.308394888	0	0	0.226191835	0	0.004548402	0	0.007699207
Vindesine	0.118879361	0.160199253	0	0.135239244	0.568551799	1.048873724	0	0	0.019626734	0.08882903	0.01012582	0	0.020159637	0	0.028101139	0.042194922	0.044998703	0.459014213	0.011500773	0.09361196	0.269119072	0.111608124	4.692529863	0.421360437	0.212885637	0.167286151	0.106350835	0.180435408	0.225366488	0.333713587	0.006063031	0	0.04658867	0	0	0	0	0	0.024227448	0	0.032145935	0.308394888	0	0	0.226191835	0	0.004548402	0	0.007699207
Vinorelbine	0.118879361	0.160199253	0	0.135239244	0.568551799	1.048873724	0	0	0.019626734	0.08882903	0.01012582	0	0.020159637	0	0.028101139	0.042194922	0.044998703	0.459014213	0.011500773	0.09361196	0.269119072	0.111608124	4.692529863	0.421360437	0.212885637	0.167286151	0.106350835	0.180435408	0.225366488	0.333713587	0.006063031	0	0.04658867	0	0	0	0	0	0.024227448	0	0.032145935	0.308394888	0	0	0.226191835	0	0.004548402	0	0.007699207
Vismodegib	0.004967426	0.06036799	0.008916246	0	0.119535139	0.492912731	0	0	0	0.00719818	0	0	0	0	0.01841112	0.029696943	0.014624497	0.234599623	0	0.01232377	0.033112608	0.039019121	1.223372036	0	0.044111085	0.0618555	0.203702655	0.032181108	0.036698478	0.048863945	0.006063031	0	0	0	0	0.023004371	0	0	0	0	0.025557584	0.014492124	0	0	0	0	0	0	0.029696943
Vorinostat	2.677200705	4.459362864	1.727301554	0.196579155	3.161558337	10.86860089	1.171863973	0.049608617	0.062265758	3.734794457	3.673054905	4.396964628	0.229654895	0.018527967	0.078917345	0.356658685	2.962070285	2.375219847	0.906972679	8.783529502	5.617075578	6.722621329	34.64776461	5.544231965	5.58248042	3.841995773	5.028780746	6.734149648	4.658760201	1.886904969	0.174228332	0.051322749	0.007035911	7.230164378	3.515996744	0.226264343	1.323756712	0.088896423	0.160792885	0.031280661	0.091734571	0.063576971	2.655933338	0.004248978	6.767527726	2.215892894	0.02016894	3.88077042	0.039030552
[truncated: 3,751 more columns]
