# Supplementary material for: Pathway Based Analysis of Mutation Data Is Efficient for Scoring Target Cancer Drugs
Source: Front Pharmacol. 2019 Jan 23;10:1. doi: 10.3389/fphar.2019.00001 (PMC6351482; doi:10.3389/fphar.2019.00001)
Supplement: Supplementary Data Sheet 3 — Mutation drug scores for 3800 TCGA tumor samples for 10 versions of drug scoring algorithm. The dataset contains 10 tables that match the 10 methods of drug scoring. [file Data_Sheet_3.ZIP › MDS_N_b.csv]

	TCGA.AG.3881.01	TCGA.63.6202.01	TCGA.MH.A561.01	TCGA.DZ.6135.01	TCGA.BR.8368.01	TCGA.HU.A4GQ.01	TCGA.36.1571.01	TCGA.19.5953.01	TCGA.41.2573.01	TCGA.CZ.4865.01	TCGA.A4.A57E.01	TCGA.02.0114.01	TCGA.81.5911.01	TCGA.27.2526.01	TCGA.BP.4351.01	TCGA.B8.5159.01	TCGA.IN.8663.01	TCGA.AH.6644.01	TCGA.CM.5344.01	TCGA.AA.3685.01	TCGA.EI.6508.01	TCGA.AA.3697.01	TCGA.AA.3977.01	TCGA.AG.A02X.01	TCGA.DC.4745.01	TCGA.AA.3494.01	TCGA.85.6560.01	TCGA.A6.6782.01	TCGA.D5.6533.01	TCGA.G4.6293.01	TCGA.HT.7873.01	TCGA.DU.7294.01	TCGA.DB.A64R.01	TCGA.FG.6690.01	TCGA.DU.6542.01	TCGA.HT.8109.01	TCGA.DU.A5TW.01	TCGA.HT.7877.01	TCGA.HW.8322.01	TCGA.HT.7695.01	TCGA.DU.6393.01	TCGA.QH.A65Z.01	TCGA.HT.8106.01	TCGA.DB.A64P.01	TCGA.DB.A64X.01	TCGA.DU.5851.01	TCGA.06.6701.01	TCGA.HT.7879.01	TCGA.FG.7634.01
Abemaciclib_(LY2835219)	0.55322119	0.821196407	0.135867866	0.029216339	0.586418533	1.579308922	0.146442965	0.026852622	0.034123305	0.656856511	0.429938402	0.480887021	0.178956909	0.018528862	0.042772891	0.062660849	0.861064645	0.444803902	0.054099571	0.980783792	0.721816372	0.773342479	5.780397566	1.071511392	0.727952338	0.46593167	0.681272066	0.755710611	0.687943306	0.246077811	0	0.030039292	0.003574697	0.86829912	0.398271598	0.022468504	0.153266717	0.000637317	0.016640552	0.016842441	0.003860734	0.01364253	0.276638025	0.003304183	0.852088876	0.265814711	0.001900321	0.490842006	0.019711702
Afatinib	3.783600863	2.044151652	0.722802019	0.204328739	3.55820168	5.2790517	0.092743211	0.099225874	0.126903343	0.297092602	0.539177885	0.335855321	0.942549026	0.090128432	0.157263798	0.4000184	0.865667299	3.334592653	1.287319401	1.055111693	1.513597402	0.966161327	19.05752958	2.501090883	2.37409293	0.815657917	1.129581657	1.826070209	1.64093947	1.007418817	0.068324808	0.07290009	0.052651491	0.567068114	0.245058621	0.075974433	0.430711491	0.057598037	0.077222201	0.070324213	0.049794133	0.060230276	0.161932981	0.058809667	1.169407548	0.173046585	0.046459282	0.357979402	0.290101102
Aflibercept	0.962879065	0.737863569	0.168341986	0.059208199	0.975769302	2.145496505	0.062839656	0.058552993	0.054961268	0.208084566	0.298552508	0.274931966	0.073796572	0.043911899	0.208913872	0.244320837	0.303379617	0.822548908	0.233652067	0.625512048	0.677551205	0.523291665	7.894315703	0.786142571	0.949950079	0.332783765	0.583994251	0.879787535	0.740698084	0.328486673	0.003335	0.021843845	0.020286604	0.403412591	0.193230188	0.01618924	0.425500719	0.030260494	0.020502122	0.136146423	0.021090667	0.022662375	0.123560513	0.042691411	0.563581347	0.135175924	0.078876504	0.22502155	0.085711361
Alectinib	0.714372393	0.659464069	0.093782358	0.044247211	0.783780708	1.48128083	0.031734277	0.044396514	0.03338824	0.116204162	0.216198511	0.146859179	0.070185822	0.032220462	0.080631235	0.046263181	0.200551087	0.69557113	0.190797827	0.404419037	0.438310565	0.42123322	5.999460511	0.642349334	0.672693508	0.260238654	0.499767678	0.707288067	0.344150054	0.23676873	0.003254111	0.041863342	0.00174857	0.211767922	0.09520283	0.041483154	0.23319392	0.014678333	0.002769187	0.051419088	0.007628735	0.019017728	0.066088173	0.028725361	0.3137389	0.073552631	0.036228936	0.116521466	0.03239035
Alemtuzumab	0.010853496	0	0	0	0.063160043	0.096612876	0	0	0	0	0	0	0	0.001680514	0.021690121	0	0.013727242	0.074360386	0	0	0.039884284	0.031822218	0.336806333	0.031715422	0.03299877	0	0.041718213	0.020333627	0	0.019233127	0	0	0	0	0	0	0	0	0	0	0	0.005367687	0	0	0.010206165	0	0	0	0
Alitretinoin	0.135021075	0.047109729	0.028637384	0.002728331	0.122783575	0.245943433	0.003483057	0.002341414	0.001495891	0.025575711	0.026304296	0.013393953	0.018765081	0.00119588	0.012369542	0.016159127	0.008656344	0.098785997	0.019330144	0.110503916	0.107793482	0.058649245	1.357150783	0.101965821	0.103688041	0.030616718	0.057348504	0.062578804	0.048503329	0.094543617	0.001298603	0	0.0017796	0.022843908	0.015793773	0.009659483	0.030688054	0	0	0.003473145	0.000541451	0.012316428	0.022208088	0.015652083	0.056770288	0.007793757	0.000198643	0.013726814	0.008543657
Apalutamide_ARN-509	0.360556317	0.287212312	0.150722683	0.001664295	0.520767746	1.466632401	0.029910105	0.005945926	0.002724923	0.137883421	0.0960748	0.133520742	0.041498028	0.011798309	0.007703803	0.211619624	0.098706266	0.274693761	0.138322303	0.689095407	0.351344511	0.36150324	4.090095792	0.589972716	0.529681353	0.172762222	0.248828095	0.323549245	0.590463897	0.637386005	0.003435718	0.010323512	0	0.203459095	0.130569265	0.006528203	0.036919287	0.052047551	0.01444867	0.014659135	0.016749239	0.013023447	0.133283051	0.085857288	0.349689169	0.062090311	0.022972113	0.104685369	0.0329735
Arsenic_trioxide	0.85993355	0.957012835	0.196555154	0.041410509	0.811072248	2.058840548	0.129566204	0.0287191	0.030213733	0.526031396	0.410900878	0.448533963	0.139966933	0.021782508	0.045796642	0.10657587	0.734720355	0.685404684	0.196954077	1.044092079	0.809760995	0.851485759	7.503986165	1.132513961	0.904272426	0.487106695	0.688344065	0.85922899	0.71726618	0.375373283	0.004699082	0.040233978	0.017448171	0.812558557	0.363891214	0.080184135	0.215707343	0.005881355	0.025229666	0.03124103	0.030939499	0.081603303	0.297224795	0.017275271	0.859735241	0.251329272	0.036055648	0.466823512	0.076629738
Atezolizumab	0	0.055320076	0	0	0.031574627	0	0	0	0	0	0	0	0	0	0	0	0.036620615	0	0	0	0.052893261	0	0.344299397	0	0	0	0	0	0	0.036620615	0	0	0	0	0	0	0	0	0	0	0	0	0	0	0	0	0	0	0
Avelumab	0	0.055320076	0	0	0.031574627	0	0	0	0	0	0	0	0	0	0	0	0.036620615	0	0	0	0.052893261	0	0.344299397	0	0	0	0	0	0	0.036620615	0	0	0	0	0	0	0	0	0	0	0	0	0	0	0	0	0	0	0
Axitinib	1.114208831	0.629363222	0.144016783	0.080068357	0.992831498	2.078315919	0.021104617	0.04648262	0.044958067	0.077392943	0.161607317	0.139506929	0.089196294	0.039650904	0.096266776	0.185542273	0.15023145	0.930255724	0.206740771	0.458627177	0.567750556	0.372818003	7.147595955	0.728097767	0.768496316	0.248773026	0.423329723	0.674676851	0.699907951	0.350778638	0.005932207	0.016530553	0.015643885	0.138122333	0.066125996	0.022207962	0.321887953	0.025080601	0.018142796	0.144276749	0.015304922	0.016768305	0.058007101	0.027331903	0.354686718	0.050756841	0.045759949	0.110513026	0.086931537
Belinostat	0.243381882	0.405396624	0.157027414	0.017870832	0.287414394	0.988054626	0.106533088	0.004509874	0.005660523	0.339526769	0.333914082	0.399724057	0.020877718	0.001684361	0.007174304	0.032423517	0.269279117	0.215929077	0.082452062	0.798502682	0.510643234	0.611147394	3.149796783	0.504021088	0.50749822	0.349272343	0.457161886	0.612195423	0.423523655	0.171536815	0.015838939	0.004665704	0.000639628	0.657287671	0.319636068	0.020569486	0.120341519	0.008081493	0.014617535	0.002843696	0.008339506	0.005779725	0.241448485	0.000386271	0.615229793	0.201444809	0.00183354	0.352797311	0.003548232
Bevacizumab	2.888637194	2.213590706	0.505025958	0.177624597	2.927307906	6.436489516	0.188518968	0.175658979	0.164883805	0.624253699	0.895657524	0.824795897	0.221389715	0.131735697	0.626741617	0.73296251	0.910138851	2.467646725	0.700956201	1.876536144	2.032653616	1.569874996	23.68294711	2.358427712	2.849850237	0.998351294	1.751982754	2.639362606	2.222094253	0.98546002	0.010005	0.065531535	0.060859812	1.210237774	0.579690563	0.04856772	1.276502158	0.090781483	0.061506365	0.408439268	0.063272001	0.067987126	0.370681538	0.128074233	1.690744042	0.405527771	0.236629512	0.67506465	0.257134082
Bexarotene	0.222170691	0.066881519	0.054840704	0.005456661	0.215876157	0.473230809	0.006966114	0.004682828	0.002991781	0.051151421	0.050287636	0.026787906	0.035830333	0.00239176	0.024739083	0.028075833	0.017312689	0.14895589	0.038660288	0.221007832	0.215586965	0.11729849	2.632564419	0.168028048	0.194198502	0.061233435	0.110454588	0.118255279	0.083822915	0.184844815	0.002597207	0	0.0035592	0.045687815	0.031587545	0.014756444	0.061376109	0	0	0.006946289	0.000193658	0.024632855	0.044416176	0.028264522	0.103151286	0.015587514	0.000397287	0.027453628	0.012844893
Bicalutamide	0.360556317	0.287212312	0.150722683	0.001664295	0.520767746	1.466632401	0.029910105	0.005945926	0.002724923	0.137883421	0.0960748	0.133520742	0.041498028	0.011798309	0.007703803	0.211619624	0.098706266	0.274693761	0.138322303	0.689095407	0.351344511	0.36150324	4.090095792	0.589972716	0.529681353	0.172762222	0.248828095	0.323549245	0.590463897	0.637386005	0.003435718	0.010323512	0	0.203459095	0.130569265	0.006528203	0.036919287	0.052047551	0.01444867	0.014659135	0.016749239	0.013023447	0.133283051	0.085857288	0.349689169	0.062090311	0.022972113	0.104685369	0.0329735
Binimetinib_(MEK162)	7.621253557	4.413461378	0.506174737	0.256668226	7.733543455	9.617252958	0.214307228	0.250290626	0.348603048	0.728864873	1.011807517	0.745707323	0.822852609	0.152338767	0.252800902	0.880981957	0.529900991	5.936591989	0.652279526	3.089761644	2.92185608	2.216879359	33.92062259	5.210811556	3.880769814	1.248785241	2.003219484	4.72167705	2.935124407	1.645602478	0.076398835	0.245695671	0.090333235	1.363802335	0.599830148	0.10518361	0.588155722	0.139961843	0.085881408	0.215079033	0.063608351	0.132948358	0.406110316	0.214244942	3.81411636	0.422967387	0.116522183	0.76501924	0.681081894
Blinatumomab	0.683789661	0.882569493	0.089592736	0.011101642	0.765866443	1.087621139	0.021588908	0.027659025	0.027558303	0.050272545	0.076718261	0.06875205	0.049964858	0.043053483	0.039639057	0.110220495	0.14188296	0.550772681	0.113173916	0.221695312	0.462873375	0.269400944	7.07083655	0.369512122	0.496550893	0.107555156	0.263589288	0.381143545	0.296182835	0.30869661	0.000249367	0.012356963	0.004066628	0.105470078	0.048474771	0.009679063	0.135779882	0.01101887	0	0.011212797	0.01460762	0.007122281	0.037387071	0.011889839	0.174975162	0.040931339	0.031436507	0.058112754	0.113460668
Bortezomib	0.043561135	0.123106403	0.007584074	0.002342772	0.123645087	0.384673001	0.027887706	0.008506412	0.007104364	0.12854488	0.086553183	0.100738954	0.006363144	0.007056085	0.010529296	0.019251668	0.069032718	0.033982926	0.013319506	0.181275424	0.125221817	0.125530245	1.471087282	0.154027931	0.190966571	0.090124256	0.215660758	0.129793441	0.11223976	0.059489508	0.000534003	0.082381761	0.000413877	0.181076762	0.083429372	0.001073278	0.049302167	0.002865499	0.000806178	0.005367547	0.001171656	0.003750336	0.058065224	0.002266304	0.167192384	0.057235776	0.0020406	0.096417691	0.00095308
Bosutinib	2.616769057	3.042617483	0.626170738	0.161980271	2.74806358	6.152605994	0.379325194	0.122661957	0.130489156	1.23808149	1.203601035	1.691482403	0.336881795	0.114058509	0.153446987	0.463635522	1.505395971	2.714086991	0.462451277	3.943102019	2.582274911	2.353643785	20.83525423	2.982800152	3.092621162	1.417466757	2.195183744	3.079021371	3.117204501	1.379694622	0.05057203	0.203671539	0.05665901	2.369783846	1.101364298	0.065608345	0.530008141	0.094430178	0.063198033	0.109166803	0.076960665	0.075946248	0.746582379	0.105556238	2.677339646	0.736622381	0.082008847	1.288901371	0.345193208
Brentuximab_vedotin	0.173610516	0.163002291	0.018810953	0.007157481	0.23528006	0.307659054	0.007478221	0.010244865	0.004540783	0.02334426	0.040409951	0.030379796	0.021255285	0.006467354	0.006992267	0.00367596	0.025522392	0.133898147	0.02903394	0.164238504	0.114381412	0.12860862	1.401690579	0.163594509	0.114697699	0.049836515	0.097539672	0.176244366	0.073668725	0.043843832	0	0.005189992	0	0.04903908	0.022434664	0.010357856	0.040725899	0.001154237	0	0.032972669	0.000200797	0.001535532	0.016910766	0.025230323	0.080070216	0.017226543	0.047609926	0.026173775	0.001880547
Brigatinib	3.711635531	2.01036813	0.480445534	0.186873076	3.210944928	4.764474147	0.092743211	0.096925469	0.126903343	0.297092602	0.539177885	0.335855321	0.93876304	0.090128432	0.157263798	0.304470442	0.629570854	2.885674655	0.769646733	1.055111693	1.377635242	0.929347231	17.60709773	2.466832754	2.073595928	0.795643832	1.016991585	1.815760766	1.557854163	0.847461576	0.030682047	0.07290009	0.052651491	0.567068114	0.245058621	0.041121844	0.415592962	0.057598037	0.077222201	0.070324213	0.041277595	0.060230276	0.161932981	0.058809667	1.130688211	0.173046585	0.046459282	0.317838105	0.227862832
Cabazitaxel	0.005943968	0.008009963	0	0.006761962	0.02842759	0.052443686	0	0	0.000981337	0.004441451	0.000506291	0	0.001007982	0	0.001405057	0.002109746	0.002249935	0.022950711	0.000575039	0.004680598	0.013455954	0.005580406	0.234626493	0.021068022	0.010644282	0.008364308	0.005317542	0.00902177	0.011268324	0.016685679	0.000303152	0	0.002329434	0	0	0	0	0	0.001211372	0	0.001607297	0.015419744	0	0	0.011309592	0	0.00022742	0	0.00038496
Cabozantinib	1.664033958	0.969666952	0.652762097	0.219194178	1.524669141	3.15871356	0.048617067	0.061352058	0.075101463	0.141204446	0.259679404	0.284940887	0.174238169	0.056578838	0.150393138	0.281905607	0.279151631	1.386728267	0.262066297	0.635717587	0.867899896	0.63050853	10.49003073	1.068516118	1.228822972	0.349789584	0.678449532	0.911732465	0.928748507	0.616701359	0.009928291	0.131487424	0.05063063	0.259268171	0.123737193	0.030496216	0.374782131	0.038281051	0.05991808	0.124636008	0.024162227	0.023619526	0.097746594	0.065960379	0.55522152	0.095168655	0.070829885	0.177060075	0.181250286
Carfilzomib	0.188634182	0.243102913	0.042976421	0.013275706	0.650340756	1.664022738	0.032984989	0.048203	0.040258063	0.353284943	0.115331997	0.133195354	0.036057819	0.039984483	0.059666009	0.015602497	0.030130251	0.184459138	0.075477198	0.276955319	0.226457983	0.256229804	6.680531766	0.330817463	0.638147065	0.135568075	0.784418911	0.282340219	0.254752001	0.337107209	0.003026018	0.46682998	0.002345304	0.213306894	0.093178456	0.006081911	0.068916229	0.000740598	0.004568341	0.011578796	0.006639382	0.003773257	0.078945574	0.012842392	0.204253264	0.07424537	0.011563402	0.108708198	0.005400788
Ceritinib_(Zykadia_LDK378)	0.714372393	0.659464069	0.093782358	0.044247211	0.783780708	1.48128083	0.031734277	0.044396514	0.03338824	0.116204162	0.216198511	0.146859179	0.070185822	0.032220462	0.080631235	0.046263181	0.200551087	0.69557113	0.190797827	0.404419037	0.438310565	0.42123322	5.999460511	0.642349334	0.672693508	0.260238654	0.499767678	0.707288067	0.344150054	0.23676873	0.003254111	0.041863342	0.00174857	0.211767922	0.09520283	0.041483154	0.23319392	0.014678333	0.002769187	0.051419088	0.007628735	0.019017728	0.066088173	0.028725361	0.3137389	0.073552631	0.036228936	0.116521466	0.03239035
Cetuximab	7.423271063	4.02073626	0.960891069	0.373746152	6.421889856	9.528948293	0.185486422	0.193850938	0.253806686	0.594185203	1.078355771	0.671710643	1.87752608	0.180256864	0.314527597	0.608940885	1.259141709	5.77134931	1.539293467	2.110223385	2.755270483	1.858694462	35.21419546	4.933665509	4.147191856	1.591287664	2.033983169	3.631521531	3.115708326	1.694923151	0.061364094	0.145800181	0.105302983	1.134136228	0.490117242	0.082243688	0.831185924	0.115196074	0.154444402	0.140648425	0.08255519	0.120460551	0.323865962	0.117619334	2.261376422	0.346093169	0.092918564	0.63567621	0.455725664
Cobimetinib	7.621253557	4.413461378	0.506174737	0.256668226	7.733543455	9.617252958	0.214307228	0.250290626	0.348603048	0.728864873	1.011807517	0.745707323	0.822852609	0.152338767	0.252800902	0.880981957	0.529900991	5.936591989	0.652279526	3.089761644	2.92185608	2.216879359	33.92062259	5.210811556	3.880769814	1.248785241	2.003219484	4.72167705	2.935124407	1.645602478	0.076398835	0.245695671	0.090333235	1.363802335	0.599830148	0.10518361	0.588155722	0.139961843	0.085881408	0.215079033	0.063608351	0.132948358	0.406110316	0.214244942	3.81411636	0.422967387	0.116522183	0.76501924	0.681081894
Crizotinib	0.976729065	0.747094263	0.481378238	0.159593918	1.171222465	2.113980038	0.053479262	0.045987412	0.060143455	0.155256926	0.246826995	0.243436771	0.13983859	0.034156519	0.088282796	0.126357166	0.231997362	0.944115078	0.195813705	0.572346569	0.662302475	0.503863438	7.364162772	0.849434877	0.860266904	0.392157381	0.501639047	0.771515516	0.479090745	0.389058427	0.015906325	0.039208783	0.033894679	0.285472495	0.135362183	0.027894255	0.200935296	0.026799074	0.027518556	0.059142364	0.019721866	0.029794386	0.092750962	0.038586808	0.456108067	0.09776188	0.031420322	0.163748369	0.08866464
CYT387_(Momelotinib)	3.881291626	1.542898205	0.431541679	0.043891811	2.142501568	5.162403386	0.025740118	0.050073738	0.05806641	0.077613656	0.184608672	0.098615477	0.278221997	0.033468286	0.111154103	0.794603883	0.205853026	2.860107414	0.696290593	1.018444144	1.577472288	0.825127889	17.43948456	1.015126862	1.292295749	0.444727405	1.136017239	1.478153476	1.663605707	1.068083396	0.033876772	0.03919273	0.012631156	0.100012383	0.060221482	0.089752688	0.61740205	0.026402228	0.037695349	0.076887694	0.028426435	0.02792203	0.043652797	0.084988171	0.554747814	0.044460695	0.109350073	0.057668256	0.719356127
Dabrafenib	7.22357331	4.056837416	0.408972005	0.206766346	5.878492921	7.777291569	0.151843294	0.181236785	0.274756492	0.585977617	0.815416909	0.581634804	0.684791025	0.15363171	0.23176442	0.713150295	0.610197337	5.319704599	0.500205499	2.426825067	2.375074634	1.571622611	28.94789093	4.525092677	3.740978649	0.940997903	1.659510691	4.960336854	2.812012215	1.603631758	0.063638335	0.239424003	0.080519158	0.954821009	0.445798397	0.107151321	0.478612056	0.10561046	0.059446403	0.170822953	0.069474251	0.138365919	0.325850722	0.239656121	3.003500053	0.312791962	0.131177589	0.553956948	0.524440248
Daratumumab	0.101932883	0.089956949	0.005101233	0.012578239	0.238936582	0.34833907	0	0	0.016736075	0.05198586	0.018041125	0	0.009291982	0	0.005086418	0.01577972	0.001927952	0.210383633	0.026039632	0.109996898	0.163486111	0.054370458	1.976367787	0.050170928	0.281849815	0.031771021	0.138714083	0.138383524	0.048468157	0.093639066	0.002047779	0.004416649	0.005871025	0	0	0.007535852	0.013719115	0.036788109	0	0	0	0.008777393	0	0	0.026978111	0.009987516	0.044473012	0.012760148	0.004130038
Dasatinib	1.927574917	1.937276887	0.315742106	0.112842445	1.818263322	3.645042202	0.179766846	0.086559183	0.079211078	0.589252398	0.60326399	0.796749265	0.206784797	0.079692519	0.09883483	0.31240643	0.758041219	1.865946599	0.285799426	1.929032578	1.653274749	1.26652492	13.03397404	1.637122049	1.717140803	0.751701851	1.207886816	1.630924766	1.696739845	0.859866711	0.025489958	0.103024195	0.036509573	1.141683034	0.525021391	0.041240882	0.429428794	0.050987975	0.03056439	0.059309519	0.047585587	0.043234299	0.354740146	0.049528645	1.317107841	0.359413022	0.064848201	0.622224264	0.263810571
Degarelix	0.134190058	0.1384077	0.018378264	0	0.19209252	0.250255294	0	0.010308819	0.014120326	0.011061867	0.00320667	0	0.02176165	0.012384447	0.007022952	0.012158108	0.008743606	0.165562042	0.004885192	0.039510373	0.039732266	0.051262617	1.276770556	0.166688466	0.053817004	0.019067887	0.086291962	0.101912835	0.038270054	0.050392059	0.00741064	0.001266584	0	0	0.012668392	0.014915522	0.013909849	0.011298521	0	0.002562624	0.000816243	0.007044023	0.026552939	0.005325909	0.017105994	0	0.003465292	0	0.0113264
Denileukin_diftitox_(Ontac)	2.31944211	1.070609924	0.075006041	0.075313468	1.056499057	1.992948586	0.031196321	0.018809828	0.014597867	0.086928159	0.189526022	0.087262787	0.138755631	0.020614896	0.055324266	0.166686972	0.119369173	1.385142374	0.197166238	0.454433854	1.170890882	0.39727573	9.357859334	0.598355549	0.802363895	0.542903254	0.541216859	0.631135618	0.804416401	0.311325347	0.007149401	0.016715232	0.004287327	0.148297941	0.068147272	0.045597518	0.7874614	0.00944213	0.004514858	0.042466944	0.017811175	0.011166777	0.045493076	0.033149044	0.291773703	0.054664651	0.060392747	0.096567335	0.155622499
Denosumab	0.505678117	0.449241702	0.060325093	0.049041498	0.804903942	0.825706746	0.033292208	0.037100896	0.022091805	0.034911026	0.165773526	0.044758301	0.023207084	0.008785472	0.033107911	0.044322093	0.094098724	0.557586384	0.211105668	0.343520409	0.255022795	0.395255969	4.689020059	0.470844427	0.441588575	0.089168621	0.343850753	0.37926541	0.183163628	0.227659763	0.007296104	0.008364595	0.018138507	0.071833437	0.032515477	0.012577166	0.0992546	0.002991731	0.000500679	0.0326506	0.016998131	0.003147841	0.023631308	0.093037837	0.142450092	0.033051942	0.024669538	0.044238453	0.048431502
Docetaxel	0.097312748	0.166184781	0.002103291	0.028450155	0.232344164	0.587014779	0.020926798	0.030568989	0.020771045	0.086939086	0.070466912	0.075276766	0.010330248	0.000159258	0.012399095	0.015340167	0.017070963	0.1956797	0.043048109	0.182784513	0.23122793	0.157698351	2.11749294	0.235670082	0.146528171	0.11020234	0.117373139	0.158868774	0.132060514	0.170888094	0.005719676	0	0.009317734	0.136024186	0.09149482	0.005465836	0.030560858	0	0.002668832	0.000613704	0.007569348	0.050308235	0.041853596	0.000175273	0.177803321	0.041853596	0.002680351	0.073592562	0.008183805
Dovitinib	0.65326743	0.48224236	0.286807791	0.035787253	0.673029932	1.119683292	0.015314857	0.036000017	0.031411325	0.04931796	0.086884865	0.085881113	0.067350756	0.02560426	0.058413031	0.101959806	0.111369926	0.554711236	0.157693875	0.343754133	0.37012421	0.252674361	3.818909616	0.484627197	0.416674433	0.11298616	0.260988882	0.412297304	0.396402757	0.238827396	0.003911137	0.011398604	0.007787025	0.088097944	0.041645413	0.022834797	0.09750867	0.02767408	0.014544372	0.045346281	0.00799746	0.012876088	0.034778315	0.016700357	0.195827537	0.03592933	0.027163193	0.060790577	0.074467142
Durvalumab	0.280034949	0.445061086	0.061009379	0.014035702	0.302079337	0.516825111	0.005419246	0.01209641	0.010088946	0.017859647	0.043099605	0.026718649	0.017731758	0.010913227	0.011658028	0.065560139	0.046202334	0.297220779	0.047846586	0.113662823	0.145198881	0.080067493	2.83286258	0.187470485	0.235299599	0.036771824	0.121451875	0.150928608	0.155155824	0.122989851	0.001739572	0.004231389	0.007061644	0.035666508	0.016257739	0.005911137	0.068884858	0.001030436	0	0.008530034	0.004133091	0.001573921	0.011815654	0.010450424	0.052949729	0.012448499	0.008104097	0.026250291	0.05912032
Elotuzumab	0.011179136	0.014744376	0	0	0.017355259	0.04416266	0	0.006286508	0	0	0	0.003050726	0.010066534	0	0.003016591	0	0.000906428	0.018333688	0.003331777	0	0.003121908	0.01862389	0.292660599	0.016214923	0.003314935	0.004619818	0.015566308	0.006853302	0.006763789	0.007890715	0	0.001778651	0	0	0	0	0	0	0	0	0	0	0	0	0.001812806	0.004022122	0.00849146	0	0.00634004
Enzalutamide	0.360556317	0.287212312	0.150722683	0.001664295	0.520767746	1.466632401	0.029910105	0.005945926	0.002724923	0.137883421	0.0960748	0.133520742	0.041498028	0.011798309	0.007703803	0.211619624	0.098706266	0.274693761	0.138322303	0.689095407	0.351344511	0.36150324	4.090095792	0.589972716	0.529681353	0.172762222	0.248828095	0.323549245	0.590463897	0.637386005	0.003435718	0.010323512	0	0.203459095	0.130569265	0.006528203	0.036919287	0.052047551	0.01444867	0.014659135	0.016749239	0.013023447	0.133283051	0.085857288	0.349689169	0.062090311	0.022972113	0.104685369	0.0329735
Erlotinib	3.718930116	2.01036813	0.480445534	0.186873076	3.230160282	4.803128101	0.092743211	0.096925469	0.126903343	0.297092602	0.539177885	0.335855321	0.93876304	0.090128432	0.157263798	0.308303108	0.629570854	2.903867357	0.775776381	1.08110159	1.397112339	0.956679618	17.76380444	2.508772722	2.086799112	0.801714741	1.024095876	1.815760766	1.585599644	0.861587596	0.030682047	0.07290009	0.052651491	0.567068114	0.245058621	0.041121844	0.415592962	0.057598037	0.077222201	0.070324213	0.041277595	0.060230276	0.161932981	0.079465759	1.130688211	0.173046585	0.046459282	0.317838105	0.227862832
Estramustine	0.450148213	0.547332113	0.104802129	0.01053323	0.959000856	1.236226912	0.119449027	0.016608217	0.019233812	0.32288067	0.338388898	0.379094215	0.075442175	0.01391682	0.02723512	0.077826267	0.118718094	0.591880654	0.078041456	0.80236673	0.600997539	0.579576446	4.449564916	0.940182206	0.613244587	0.573198172	0.56889385	0.561401367	0.590285761	0.205887473	0.014822902	0.017083365	0.00178017	0.668454215	0.305772019	0.090595954	0.123942766	0.015838702	0.017474213	0.003794469	0.012575389	0.03217087	0.220824412	0.037769858	0.706395309	0.2019369	0.005173651	0.351739996	0.06161731
Everolimus	1.610815822	2.036617886	0.314640127	0.08403111	1.984134059	3.6278423	0.087458562	0.254046315	0.141148935	0.33805616	0.34821653	0.663046018	0.222260228	0.184613824	0.160135707	0.41756165	0.351986099	2.062839336	0.507449193	1.098952007	1.371995428	0.684591801	14.59190642	2.033803296	2.495806434	0.475768061	0.82127705	1.44680546	1.631199776	1.662408291	0.024414307	0.043141767	0.030021385	0.566759908	0.265472894	0.071695964	0.220123209	0.132223923	0.025376194	0.073832604	0.243358562	0.074431321	0.189543528	0.128742265	1.057332265	0.187557004	0.060961174	0.318505386	0.297492866
Exemestane	0.038170497	0.007336972	0.012640627	0	0.07760503	0.490271631	0	0.097937274	0.024724368	0.012355289	0	0	0	0	0	0	0.008086689	0.083084731	0.103355974	0.020881622	0.070721509	0.02035225	1.436694529	0.026607067	0.079691513	0.099314417	0.035534502	0.019458887	0.042087542	0.05311047	0.008589294	0	0	0	0.012262566	0	0	0	0	0	0	0	0.012640627	0	0.091047221	0	0	0	0
Flavopiridol_(Alvociclib)	1.294597539	1.144499005	0.206861176	0.154287464	1.111681145	2.681361021	0.170729492	0.049989416	0.039464102	0.7141789	0.574931907	0.613561974	0.267607079	0.023655333	0.047713	0.101970299	0.339690086	0.995673883	0.218534152	1.380047178	1.154675285	1.076557334	9.977935083	1.216258122	1.448158796	0.656432375	0.947995925	1.151104068	1.156585806	0.459341125	0.008065715	0.040744663	0.033018098	1.084907466	0.498881975	0.029370276	0.242687092	0.021124687	0.034972214	0.019749108	0.02147048	0.032712084	0.34131896	0.014798478	1.207803173	0.330759185	0.016118165	0.589613083	0.063595194
Foretinib	0.957633554	0.504102742	0.226254591	0.056583604	0.893496341	1.367325635	0.016815644	0.034822074	0.03828099	0.056889973	0.115179	0.097444101	0.169811873	0.026290519	0.06027809	0.129144258	0.165031859	0.755442555	0.204886322	0.283192775	0.397611577	0.243688898	4.61123709	0.601754688	0.526437638	0.145955705	0.264033696	0.480710024	0.43930986	0.258214286	0.005910736	0.016458552	0.014547798	0.1052137	0.047400741	0.022834797	0.106628999	0.011772875	0.022192915	0.044903237	0.008591416	0.013685025	0.035628148	0.017190443	0.269685223	0.034555253	0.021572854	0.067000221	0.097048709
Fulvestrant	0.637571076	0.726975181	0.156024398	0.014029492	1.347573047	1.6682724	0.157167843	0.023805289	0.02849073	0.418303915	0.434232979	0.491033736	0.111700165	0.020477085	0.028972889	0.115077339	0.170929438	0.845836576	0.073404741	1.053929502	0.785970503	0.758145533	6.115601081	1.258724927	0.818502046	0.787846126	0.759324837	0.754532412	0.802708104	0.275521833	0.022234353	0.025625047	0.002670255	0.859644293	0.392640938	0.13479803	0.139823303	0.023758054	0.02621132	0.004157444	0.018863083	0.048256305	0.287225224	0.056216604	0.935653209	0.258893956	0.006705434	0.450590055	0.091406952
Ganetespib_(STA-9090)	3.128561879	4.685841923	0.411624338	0.256903232	2.527114181	7.998907549	0.847525569	0.164320756	0.143776005	2.344392996	2.347857451	3.381569268	0.451287514	0.182368249	0.849486218	1.112477626	1.62829121	2.687499799	0.529043371	6.528502959	4.56288788	3.431902532	28.26335263	4.490218314	5.757598583	2.518022279	3.363886489	3.648486563	4.990602904	2.587430106	0	0.121889024	0.035719838	5.046845462	2.32812788	0.226746252	1.114386698	0.046491685	0.116699032	0.076934383	0.258422676	0.136390911	1.546227564	0.029323945	5.438245881	1.539303533	0.039592281	2.757942786	0.328892664
Gefitinib	7.423271063	4.02073626	0.960891069	0.373746152	6.421889856	9.528948293	0.185486422	0.193850938	0.253806686	0.594185203	1.078355771	0.671710643	1.87752608	0.180256864	0.314527597	0.608940885	1.259141709	5.77134931	1.539293467	2.110223385	2.755270483	1.858694462	35.21419546	4.933665509	4.147191856	1.591287664	2.033983169	3.631521531	3.115708326	1.694923151	0.061364094	0.145800181	0.105302983	1.134136228	0.490117242	0.082243688	0.831185924	0.115196074	0.154444402	0.140648425	0.08255519	0.120460551	0.323865962	0.117619334	2.261376422	0.346093169	0.092918564	0.63567621	0.455725664
Goserelin	0.099102413	0.139009289	0.028265555	0.003379634	0.158338684	0.26027336	0.011904762	0.018770664	0.025142384	0.013363773	0.001603335	0	0.025068525	0.011742088	0.003511476	0.006079054	0.013714815	0.141592312	0.032553132	0.029648938	0.075962852	0.076573473	1.453987412	0.121325859	0.058345507	0.029951337	0.102176004	0.141463741	0.046094268	0.045394962	0.009277713	0.000633292	0	0	0.006334196	0.020997479	0.019552556	0.009973211	0	0.001281312	0.000408122	0.009024377	0.01327647	0.002662954	0.010472235	0	0.003651884	0	0.0056632
Homoharringtonine_(Omacetaxine_mepesuccinate)	0.317782136	0.016438881	0.09048967	0.016748735	0.013968603	0.721587497	0	0	0	0.007632656	0	0	0	0	0	0.009430581	0	0.01868359	0	0.206439276	0.529483639	0.005409087	3.682926254	0.159293817	0.405589148	0.004635811	0.028695849	0.06172745	0	0.278501395	0.000859436	0	0	0	0	0	0	0	0	0	0	0	0	0	0	0	0.000859436	0	0
Ibritumomab_tiuxetan	0.2444435	0.128454922	0.001825548	0.002867778	0.37002722	0.375265691	0.010629429	0.004209605	0.030031583	0.031888287	0.040689808	0.037203001	0.013083069	0.004209605	0.004209605	0.087691704	0	0.21139102	0.007589986	0.123815321	0.138851241	0.079191925	1.214171724	0.136029085	0.157660428	0.036570651	0.167769385	0.14064791	0.089641306	0.09573268	0	0.002208325	0	0.069091288	0.031888287	0.003767926	0.017488986	0.002867926	0	0	0	0	0.021258858	0	0.101311003	0.026252616	0.014072079	0.037203001	0.087691704
Ibrutinib	2.384338603	1.394083987	0.134061734	0.073832951	2.777851789	2.786844315	0.050324726	0.099601616	0.137119615	0.067845584	0.257360364	0.074860259	0.142702471	0.075625382	0.123094826	0.244325844	0.193252227	1.709827106	0.340252297	0.897197058	0.80821764	1.043475536	11.81867784	1.260978288	1.052849738	0.205253358	0.812809708	0.897609679	0.628018454	0.660476484	0.003747292	0.050253726	0.027919139	0.120846426	0.052940655	0.027885686	0.265576922	0.017530779	0.020318068	0.080506927	0.021254877	0.018754173	0.045434883	0.095764187	0.370452843	0.063050989	0.051148761	0.070499248	0.238306267
Idelalisib	5.514234243	3.1920895	0.650177544	0.196731409	4.695881665	9.455064278	0.163988365	0.291884617	0.272585619	0.420368739	0.719610577	0.484707091	0.533596225	0.234012591	0.366251345	1.861965016	0.646212807	5.342093863	0.965792175	2.12380076	2.168256116	1.649372029	26.83851262	3.431227349	2.991249939	0.739826622	2.895709353	2.530353481	2.227982114	2.576437431	0.061593008	0.066740742	0.071739322	0.784610477	0.366703562	0.059875392	0.524942039	0.105516448	0.086338337	0.14468302	0.058899297	0.068888676	0.254384562	0.207635541	1.555250552	0.265952057	0.128175448	0.465555252	1.69550316
Imatinib	1.306864584	1.402548991	0.167317985	0.054887129	1.20841667	2.254052473	0.148147257	0.064693019	0.047865312	0.47918878	0.496695869	0.576525813	0.125751411	0.047104222	0.059382436	0.175606961	0.643210428	1.217695283	0.165374438	1.428412368	1.1744867	0.951741767	8.39948603	1.173884726	1.050861872	0.578602697	0.879028116	1.205490988	0.998958586	0.430108518	0.011733093	0.069252316	0.016797442	0.938444356	0.435890612	0.028733456	0.321971955	0.046642604	0.043704005	0.032846172	0.014919616	0.022748835	0.296320102	0.017288112	0.979864339	0.304131059	0.031157091	0.520219304	0.165411198
Inotuzumab_ozogamicin	0.221602157	0.104543814	0.025838224	0.005735556	0.242482201	0.247492932	0	0.006286508	0.003671881	0	0.017603041	0.003050726	0.01853931	0	0.003016591	0.021146271	0.000906428	0.12599796	0.003331777	0.072847891	0.117516525	0.062647191	1.179583287	0.114465883	0.095265397	0.007883712	0.095971175	0.084684854	0.047444002	0.047689028	0	0.019523934	0	0	0	0.007535852	0.013719115	0	0	0	0	0	0	0	0.058132331	0.014009637	0.036635618	0	0.027486312
Ipilimumab	0.086526798	0.265317329	0.008282703	0	0.191352029	0.277902196	0	0	0	0	0.010064412	0	0.002716033	0	0	0.076071516	0.008894317	0.140294707	0.010536714	0.091161463	0.027864328	0.006784997	1.543148725	0.081739666	0.124174662	0.003713551	0.082824896	0.014165681	0.031728354	0.116098923	0	0	0	0	0	0	0.009585155	0	0	0	0	0	0	0	0.01660028	0	0	0	0.076071516
Ixabepilone	0.005943968	0.008009963	0	0.006761962	0.02842759	0.052443686	0	0	0.000981337	0.004441451	0.000506291	0	0.001007982	0	0.001405057	0.002109746	0.002249935	0.022950711	0.000575039	0.004680598	0.013455954	0.005580406	0.234626493	0.021068022	0.010644282	0.008364308	0.005317542	0.00902177	0.011268324	0.016685679	0.000303152	0	0.002329434	0	0	0	0	0	0.001211372	0	0.001607297	0.015419744	0	0	0.011309592	0	0.00022742	0	0.00038496
Ixazomib_(MLN9708)	0.188634182	0.243102913	0.042976421	0.013275706	0.650340756	1.664022738	0.032984989	0.048203	0.040258063	0.353284943	0.115331997	0.133195354	0.036057819	0.039984483	0.059666009	0.015602497	0.030130251	0.184459138	0.075477198	0.276955319	0.226457983	0.256229804	6.680531766	0.330817463	0.638147065	0.135568075	0.784418911	0.282340219	0.254752001	0.337107209	0.003026018	0.46682998	0.002345304	0.213306894	0.093178456	0.006081911	0.068916229	0.000740598	0.004568341	0.011578796	0.006639382	0.003773257	0.078945574	0.012842392	0.204253264	0.07424537	0.011563402	0.108708198	0.005400788
Lapatinib	3.783600863	2.044151652	0.722802019	0.204328739	3.55820168	5.2790517	0.092743211	0.099225874	0.126903343	0.297092602	0.539177885	0.335855321	0.942549026	0.090128432	0.157263798	0.4000184	0.865667299	3.334592653	1.287319401	1.055111693	1.513597402	0.966161327	19.05752958	2.501090883	2.37409293	0.815657917	1.129581657	1.826070209	1.64093947	1.007418817	0.068324808	0.07290009	0.052651491	0.567068114	0.245058621	0.075974433	0.430711491	0.057598037	0.077222201	0.070324213	0.049794133	0.060230276	0.161932981	0.058809667	1.169407548	0.173046585	0.046459282	0.357979402	0.290101102
Lenalidomide	0.505678117	0.449241702	0.060325093	0.049041498	0.804903942	0.825706746	0.033292208	0.037100896	0.022091805	0.034911026	0.165773526	0.044758301	0.023207084	0.008785472	0.033107911	0.044322093	0.094098724	0.557586384	0.211105668	0.343520409	0.255022795	0.395255969	4.689020059	0.470844427	0.441588575	0.089168621	0.343850753	0.37926541	0.183163628	0.227659763	0.007296104	0.008364595	0.018138507	0.071833437	0.032515477	0.012577166	0.0992546	0.002991731	0.000500679	0.0326506	0.016998131	0.003147841	0.023631308	0.093037837	0.142450092	0.033051942	0.024669538	0.044238453	0.048431502
Lenvatinib	0.845339685	0.478398482	0.086133293	0.070202468	0.701979923	1.117372071	0.017876794	0.025914187	0.022329518	0.060045076	0.161822421	0.082331202	0.060557551	0.021261033	0.131212026	0.104919448	0.183294237	0.638265944	0.128648032	0.26303787	0.317531848	0.222004369	3.876679568	0.584928718	0.412466563	0.134728066	0.247731499	0.433362982	0.358179277	0.268607554	0.003561911	0.046262327	0.006429279	0.114527327	0.054139036	0.021795964	0.111599455	0.012349105	0.020943818	0.047860427	0.010081529	0.012128747	0.042206108	0.016908603	0.221792737	0.039661529	0.024367675	0.074314346	0.074582207
Letrozole	0.038170497	0.007336972	0.012640627	0	0.07760503	0.490271631	0	0.097937274	0.024724368	0.012355289	0	0	0	0	0	0	0.008086689	0.083084731	0.103355974	0.020881622	0.070721509	0.02035225	1.436694529	0.026607067	0.079691513	0.099314417	0.035534502	0.019458887	0.042087542	0.05311047	0.008589294	0	0	0	0.012262566	0	0	0	0	0	0	0	0.012640627	0	0.091047221	0	0	0	0
Leuprolide	0.134190058	0.1384077	0.018378264	0	0.19209252	0.250255294	0	0.010308819	0.014120326	0.011061867	0.00320667	0	0.02176165	0.012384447	0.007022952	0.012158108	0.008743606	0.165562042	0.004885192	0.039510373	0.039732266	0.051262617	1.276770556	0.166688466	0.053817004	0.019067887	0.086291962	0.101912835	0.038270054	0.050392059	0.00741064	0.001266584	0	0	0.012668392	0.014915522	0.013909849	0.011298521	0	0.002562624	0.000816243	0.007044023	0.026552939	0.005325909	0.017105994	0	0.003465292	0	0.0113264
Lomustine	0.037305677	0.057529365	0	0	0.031612913	0.1432506	0.015903573	0	0.015146008	0.055920796	0.052303732	0.058684953	0	0	0	0	0	0.008676596	0.00093343	0.119937349	0.065637494	0.083211086	0.450105029	0.064592179	0.070387586	0.047710719	0.083120182	0.059133896	0.059344729	0.021270898	0	0.011756691	0	0.103373225	0.047710719	0	0.015903573	0	0.007519892	0	0	0	0.031807146	0.006211712	0.091876545	0.031807146	0	0.055662506	0
Masitinib	1.011713495	0.826497645	0.160069682	0.048013945	0.97057231	1.64445326	0.066589	0.048594133	0.040402497	0.222562335	0.23644641	0.295713787	0.115608428	0.030434295	0.040105517	0.142080609	0.294635877	0.920250295	0.175402859	0.766895158	0.68210896	0.505860147	5.835493036	0.775558811	0.729200652	0.299626936	0.492918913	0.714852744	0.682011597	0.392093755	0.012089449	0.046601531	0.017914184	0.425477091	0.201537836	0.020803292	0.158111551	0.020237027	0.013366654	0.022210782	0.019045137	0.020522561	0.131471934	0.019515975	0.556373214	0.134359254	0.026891765	0.234141838	0.119686044
Medroxyprogesterone_acetate_(MPA)	0.433639423	0.506358069	0.117607634	0.009352995	1.027168549	1.18037602	0.104778562	0.015870192	0.01899382	0.282998266	0.289488653	0.327355824	0.074466777	0.014553852	0.01931526	0.078166122	0.115031184	0.62127607	0.048936494	0.710117289	0.53988287	0.596957425	4.44415853	0.857204702	0.563671754	0.532323683	0.506216558	0.513469181	0.547717227	0.194034163	0.015968141	0.017083365	0.00178017	0.573096195	0.261760625	0.089865354	0.093215535	0.015838702	0.017474213	0.002771629	0.012575389	0.03217087	0.191483483	0.037477736	0.669452455	0.17259597	0.004470289	0.30039337	0.060937968
Megestrol	0.066829723	0.065123844	0.045615199	0	0.697209315	0.493473488	0	0	0	0.012386969	0	0.003784294	0	0.002707386	0	0.022296702	0.007496814	0.331559629	0.037486837	0.109912783	0.207322218	0.509840364	2.803754186	0.444340133	0.165357935	0.159287666	0.037012007	0.031342718	0.16008159	0.097228073	0.003435718	0	0	0	0	0	0	0	0	0	0	0	0.004841091	0.079854946	0.137050949	0	0	0	0
Methyltestosterone	0.360556317	0.287212312	0.150722683	0.001664295	0.520767746	1.466632401	0.029910105	0.005945926	0.002724923	0.137883421	0.0960748	0.133520742	0.041498028	0.011798309	0.007703803	0.211619624	0.098706266	0.274693761	0.138322303	0.689095407	0.351344511	0.36150324	4.090095792	0.589972716	0.529681353	0.172762222	0.248828095	0.323549245	0.590463897	0.637386005	0.003435718	0.010323512	0	0.203459095	0.130569265	0.006528203	0.036919287	0.052047551	0.01444867	0.014659135	0.016749239	0.013023447	0.133283051	0.085857288	0.349689169	0.062090311	0.022972113	0.104685369	0.0329735
Midostaurin	0.960305272	0.955927226	0.105174039	0.052759606	1.007893578	1.778925502	0.079988881	0.057247758	0.045429092	0.258542652	0.390243526	0.309030926	0.082640782	0.050141299	0.103115404	0.064178022	0.23974429	0.896871441	0.184624002	0.74903813	0.71612819	0.646633763	7.562641882	0.975364961	0.943878735	0.406429536	0.7311659	0.939928209	0.598690086	0.322267772	0.023033984	0.07420812	0.013736821	0.520817448	0.244296285	0.12114472	0.263219573	0.054279684	0.017131415	0.06662173	0.028780835	0.04454916	0.169479894	0.051564772	0.61923145	0.193583978	0.074521785	0.297682476	0.061342027
Mogamulizumab	0.33580082	0.319220504	0.039433011	0.011530642	0.448719389	1.098774837	0.020491521	0.017120644	0.020958789	0.059096354	0.080570022	0.085016845	0.038801496	0.006467354	0.017131082	0.015084912	0.065420166	0.531353591	0.062744655	0.31553937	0.243972268	0.295098994	3.245001649	0.324190612	0.23478062	0.134970486	0.171806234	0.450212011	0.205803657	0.1681826	0.006985197	0.005189992	0	0.114776423	0.064021799	0.01529366	0.136888436	0.03188024	0	0.061384093	0.003124988	0.005885325	0.046873272	0.070091746	0.227742364	0.037453417	0.06658057	0.063666858	0.011279664
Moxetumomab_pasudotox	0.221602157	0.104543814	0.025838224	0.005735556	0.242482201	0.247492932	0	0.006286508	0.003671881	0	0.017603041	0.003050726	0.01853931	0	0.003016591	0.021146271	0.000906428	0.12599796	0.003331777	0.072847891	0.117516525	0.062647191	1.179583287	0.114465883	0.095265397	0.007883712	0.095971175	0.084684854	0.047444002	0.047689028	0	0.019523934	0	0	0	0.007535852	0.013719115	0	0	0	0	0	0	0	0.058132331	0.014009637	0.036635618	0	0.027486312
Necitumumab	7.423271063	4.02073626	0.960891069	0.373746152	6.421889856	9.528948293	0.185486422	0.193850938	0.253806686	0.594185203	1.078355771	0.671710643	1.87752608	0.180256864	0.314527597	0.608940885	1.259141709	5.77134931	1.539293467	2.110223385	2.755270483	1.858694462	35.21419546	4.933665509	4.147191856	1.591287664	2.033983169	3.631521531	3.115708326	1.694923151	0.061364094	0.145800181	0.105302983	1.134136228	0.490117242	0.082243688	0.831185924	0.115196074	0.154444402	0.140648425	0.08255519	0.120460551	0.323865962	0.117619334	2.261376422	0.346093169	0.092918564	0.63567621	0.455725664
Nilotinib	1.978190965	3.474756271	0.50638856	0.177603518	2.05903575	5.562876485	0.68218494	0.075415721	0.072014939	2.224747651	2.260333559	2.680346359	0.243823707	0.081423574	0.128627231	0.143620246	2.837184915	2.719913346	0.283594746	5.325204124	3.46078768	3.351591235	19.86864514	3.744599591	3.493584289	2.361724267	2.907157713	3.992989477	2.811219037	0.668286404	0.043252995	0.205919538	0.030952639	4.429201541	2.052309403	0.044163114	0.96122161	0.04060577	0.085839632	0.058470165	0.031474553	0.069939464	1.373996434	0.038414579	4.091626421	1.385146843	0.069300078	2.412157351	0.11860035
Nilutamide	0.360556317	0.287212312	0.150722683	0.001664295	0.520767746	1.466632401	0.029910105	0.005945926	0.002724923	0.137883421	0.0960748	0.133520742	0.041498028	0.011798309	0.007703803	0.211619624	0.098706266	0.274693761	0.138322303	0.689095407	0.351344511	0.36150324	4.090095792	0.589972716	0.529681353	0.172762222	0.248828095	0.323549245	0.590463897	0.637386005	0.003435718	0.010323512	0	0.203459095	0.130569265	0.006528203	0.036919287	0.052047551	0.01444867	0.014659135	0.016749239	0.013023447	0.133283051	0.085857288	0.349689169	0.062090311	0.022972113	0.104685369	0.0329735
Nimotuzumab	7.423271063	4.02073626	0.960891069	0.373746152	6.421889856	9.528948293	0.185486422	0.193850938	0.253806686	0.594185203	1.078355771	0.671710643	1.87752608	0.180256864	0.314527597	0.608940885	1.259141709	5.77134931	1.539293467	2.110223385	2.755270483	1.858694462	35.21419546	4.933665509	4.147191856	1.591287664	2.033983169	3.631521531	3.115708326	1.694923151	0.061364094	0.145800181	0.105302983	1.134136228	0.490117242	0.082243688	0.831185924	0.115196074	0.154444402	0.140648425	0.08255519	0.120460551	0.323865962	0.117619334	2.261376422	0.346093169	0.092918564	0.63567621	0.455725664
Nintedanib_(BIBF_1120)	1.43064789	1.015913825	0.200595702	0.091222434	1.348748017	2.169881762	0.026846095	0.065273492	0.059878916	0.086723121	0.159770637	0.173198374	0.138054796	0.054591612	0.134632663	0.229112543	0.206943716	1.16259936	0.246741648	0.636865132	0.694847789	0.435850092	7.893314062	0.829156442	0.844412347	0.203800548	0.501283424	0.712837429	0.895275429	0.609035886	0.011961188	0.055628101	0.02394825	0.140024892	0.06744345	0.039551668	0.198794361	0.037882774	0.022015628	0.06466117	0.031863016	0.021721968	0.053275288	0.038262221	0.373939818	0.054378467	0.041717168	0.088183908	0.192957027
Niraparib	0.057773987	0.118393772	0.035714058	0.006511281	0.168581061	0.348723343	0.012922487	0	0.04221412	0.04081956	0.055582737	0.044302371	0.004198996	0.000820092	0.008983519	0.004846783	0.026321151	0.05923701	0.049241865	0.09391071	0.118869578	0.100498588	1.356493389	0.128650008	0.213445706	0.050311937	0.137013032	0.116961233	0.07382283	0.042350022	0.000424745	0.005878346	0	0.078662494	0.036305766	0	0.027459345	0.020593791	0.003759946	0.003160242	0.000815399	0	0.024203844	0.005155271	0.075641926	0.024203844	0	0.065345649	0.002098945
Nivolumab_(BMS-936558)	0.086526798	0.118675222	0.008282703	0	0.132557177	0.079481478	0	0	0	0	0.010064412	0	0.002716033	0	0	0.00677865	0.045514932	0.071001841	0.010536714	0.030109599	0.080757589	0.006784997	0.659893598	0.081739666	0.039971352	0.003713551	0.01353203	0.014165681	0.031728354	0.051553146	0	0	0	0	0	0	0.009585155	0	0	0	0	0	0	0	0.01660028	0	0	0	0.00677865
Obinutuzumab	0.014387527	0.0205119	0	0.005735556	0.044125808	0.02827984	0	0	0	0	0.017603041	0	0	0	0	0	0	0.018599387	0	0.026679839	0.084047289	0.035095432	0.386186659	0	0.04042035	0.003263894	0.034746897	0.025107916	0.013294021	0	0	0.004416649	0	0	0	0.007535852	0.013719115	0	0	0	0	0	0	0	0.004534284	0.009987516	0.028144158	0	0
Ofatumumab	0.014387527	0.0205119	0	0.005735556	0.044125808	0.02827984	0	0	0	0	0.017603041	0	0	0	0	0	0	0.018599387	0	0.026679839	0.084047289	0.035095432	0.386186659	0	0.04042035	0.003263894	0.034746897	0.025107916	0.013294021	0	0	0.004416649	0	0	0	0.007535852	0.013719115	0	0	0	0	0	0	0	0.004534284	0.009987516	0.028144158	0	0
Olaparib	0.057773987	0.118393772	0.035714058	0.006511281	0.181275563	0.481028859	0.012922487	0	0.04221412	0.048984691	0.055582737	0.044302371	0.004198996	0.000820092	0.008983519	0.004846783	0.026321151	0.05923701	0.049241865	0.09391071	0.150798058	0.100498588	1.706676548	0.133149162	0.226608033	0.050311937	0.187890579	0.116961233	0.07382283	0.107335791	0.000424745	0.020138777	0	0.078662494	0.036305766	0	0.027459345	0.020593791	0.003759946	0.003160242	0.000815399	0	0.024203844	0.005155271	0.075641926	0.024203844	0	0.065345649	0.002098945
Olaratumab	2.495302607	2.012492354	0.383893998	0.226912127	2.532783	5.069432636	0.167129011	0.13673818	0.127031621	0.555582591	0.855917434	0.619145685	0.340138512	0.120613572	0.265157728	0.308701295	0.531842505	2.485832632	0.416740492	1.387096224	1.611900837	1.370870346	17.67820499	2.20112163	2.040724053	1.000105376	1.504679157	2.98210255	1.512595252	1.002228659	0.027827489	0.077519787	0.030494928	1.059911041	0.506473581	0.172350382	0.60884891	0.07563388	0.022927541	0.122705114	0.067958507	0.073670172	0.350138962	0.068623816	1.277019083	0.348776922	0.059096289	0.614218494	0.279780994
Osimertinib	7.423271063	4.02073626	0.960891069	0.373746152	6.421889856	9.528948293	0.185486422	0.193850938	0.253806686	0.594185203	1.078355771	0.671710643	1.87752608	0.180256864	0.314527597	0.608940885	1.259141709	5.77134931	1.539293467	2.110223385	2.755270483	1.858694462	35.21419546	4.933665509	4.147191856	1.591287664	2.033983169	3.631521531	3.115708326	1.694923151	0.061364094	0.145800181	0.105302983	1.134136228	0.490117242	0.082243688	0.831185924	0.115196074	0.154444402	0.140648425	0.08255519	0.120460551	0.323865962	0.117619334	2.261376422	0.346093169	0.092918564	0.63567621	0.455725664
Paclitaxel	0.170458593	0.165479756	0.018016843	0.01080485	0.208350211	0.327444095	0.012210265	0.00647924	0.00610308	0.039884733	0.050953739	0.04215824	0.014174856	0.004012267	0.009693685	0.026160056	0.030859622	0.163445585	0.051061123	0.131993221	0.125504762	0.090350172	1.406193136	0.164889223	0.15242649	0.062967983	0.106678953	0.12371239	0.09596311	0.080037677	0.002212	0.003815651	0.00237203	0.072311621	0.035015524	0.01262622	0.03303062	0.002565069	0.003256418	0.004728807	0.003336318	0.016205292	0.022277445	0.005303272	0.120502967	0.023034402	0.004508044	0.040675467	0.020822771
Palbociclib	0.55322119	0.821196407	0.135867866	0.029216339	0.586418533	1.579308922	0.146442965	0.026852622	0.034123305	0.656856511	0.429938402	0.480887021	0.178956909	0.018528862	0.042772891	0.062660849	0.861064645	0.444803902	0.054099571	0.980783792	0.721816372	0.773342479	5.780397566	1.071511392	0.727952338	0.46593167	0.681272066	0.755710611	0.687943306	0.246077811	0	0.030039292	0.003574697	0.86829912	0.398271598	0.022468504	0.153266717	0.000637317	0.016640552	0.016842441	0.003860734	0.01364253	0.276638025	0.003304183	0.852088876	0.265814711	0.001900321	0.490842006	0.019711702
Panitumumab	7.423271063	4.02073626	0.960891069	0.373746152	6.421889856	9.528948293	0.185486422	0.193850938	0.253806686	0.594185203	1.078355771	0.671710643	1.87752608	0.180256864	0.314527597	0.608940885	1.259141709	5.77134931	1.539293467	2.110223385	2.755270483	1.858694462	35.21419546	4.933665509	4.147191856	1.591287664	2.033983169	3.631521531	3.115708326	1.694923151	0.061364094	0.145800181	0.105302983	1.134136228	0.490117242	0.082243688	0.831185924	0.115196074	0.154444402	0.140648425	0.08255519	0.120460551	0.323865962	0.117619334	2.261376422	0.346093169	0.092918564	0.63567621	0.455725664
Panobinostat	0.243381882	0.405396624	0.157027414	0.017870832	0.287414394	0.988054626	0.106533088	0.004509874	0.005660523	0.339526769	0.333914082	0.399724057	0.020877718	0.001684361	0.007174304	0.032423517	0.269279117	0.215929077	0.082452062	0.798502682	0.510643234	0.611147394	3.149796783	0.504021088	0.50749822	0.349272343	0.457161886	0.612195423	0.423523655	0.171536815	0.015838939	0.004665704	0.000639628	0.657287671	0.319636068	0.020569486	0.120341519	0.008081493	0.014617535	0.002843696	0.008339506	0.005779725	0.241448485	0.000386271	0.615229793	0.201444809	0.00183354	0.352797311	0.003548232
Pazopanib	1.036945027	0.679634791	0.118502166	0.052746332	0.901238158	1.676434802	0.029794656	0.05626025	0.053147051	0.103803424	0.180879212	0.142444353	0.120096136	0.04947404	0.093682906	0.163936178	0.150752033	0.859134415	0.126302349	0.39683108	0.561513026	0.361840092	5.708062062	0.729535277	0.614729616	0.21253036	0.386822964	0.730115101	0.566659163	0.325649037	0.007193488	0.02428013	0.010715464	0.190878878	0.090231727	0.047944137	0.197311306	0.020581842	0.022667231	0.080892661	0.015257278	0.015613704	0.071852351	0.019272863	0.357173651	0.066102549	0.034631103	0.12946725	0.11337411
Pembrolizumab	0.086526798	0.118675222	0.008282703	0	0.132557177	0.079481478	0	0	0	0	0.010064412	0	0.002716033	0	0	0.00677865	0.045514932	0.071001841	0.010536714	0.030109599	0.080757589	0.006784997	0.659893598	0.081739666	0.039971352	0.003713551	0.01353203	0.014165681	0.031728354	0.051553146	0	0	0	0	0	0	0.009585155	0	0	0	0	0	0	0	0.01660028	0	0	0	0.00677865
Perifosine	4.63135128	3.571935756	0.566527533	0.151989463	3.752612222	8.415760083	0.257024031	0.278727366	0.223487225	0.858745928	0.998031045	1.173144125	0.459523237	0.213609642	0.347485657	1.158438813	0.398121693	4.087151796	0.618349319	2.892863937	2.486999312	1.836711367	27.14197395	3.362316633	4.849133503	1.067481056	2.405274529	2.86716237	2.720962036	2.479411306	0.033448701	0.089167985	0.057322138	1.606556741	0.750260798	0.080902443	0.535484293	0.062894797	0.04359362	0.121195747	0.164508249	0.088818294	0.506145894	0.169419668	2.617478749	0.522557404	0.112776075	0.916500916	0.992105178
Pertuzumab	3.181863458	1.929482871	1.065377711	0.148614161	3.435468524	4.769017926	0.111236429	0.093132983	0.069588214	0.38139293	0.512350275	0.423612862	0.516206286	0.074639214	0.121873014	0.406904371	1.235373582	3.434845406	2.093215028	1.055571234	1.404864801	1.005729421	16.80490294	2.294766512	2.550006778	0.607636908	1.212363325	1.603959664	1.418910132	1.113979565	0.090527884	0.069791471	0.076338539	0.708661778	0.331616311	0.136053095	0.395986413	0.062927584	0.028567087	0.072591114	0.060540658	0.061175695	0.226855302	0.04717516	1.170863663	0.238893002	0.064036538	0.478600359	0.293880695
Pomalidomide	1.265756396	1.225015166	0.234154136	0.039647874	2.427805411	2.573101958	0.114189896	0.051591914	0.080675812	0.286343894	0.568990048	0.370286146	0.096321504	0.02283646	0.059358139	0.120918732	0.190327006	1.305181741	0.437424509	1.483563142	0.905337481	1.125654397	14.76613904	1.403423323	1.040204523	0.453855539	1.40834226	1.186970281	0.768851011	0.329736013	0.016812224	0.03560494	0.016177635	0.567082909	0.289271444	0.110253648	0.235032052	0.050380001	0.004448916	0.025203323	0.039057759	0.02190931	0.197876091	0.03014288	0.932823433	0.198090359	0.062918636	0.316550951	0.092225154
Ponatinib	1.109774185	2.70379415	0.421557288	0.092540065	1.158103861	4.482579391	0.640799956	0.106062486	0.060904377	2.088688354	1.970266411	2.522710345	0.189968491	0.066388509	0.085285603	0.130513361	2.767678173	1.889126736	0.125970195	4.961100042	2.916972294	3.067965944	14.67514131	2.934431734	2.760777133	2.060546374	2.479539743	3.346433355	2.470655786	0.499316315	0.033344303	0.141049087	0.020564469	4.15865111	1.923689632	0.003281454	0.720288652	0.0481437	0.177685552	0.03229745	0.013562189	0.069406863	1.285857669	0.012406411	3.697694723	1.287297575	0.005234196	2.255644769	0.105040472
Ramucirumab_(Cyramza)	3.009237567	1.757864258	0.309814666	0.238883427	2.617835565	5.598089493	0.051674922	0.10904324	0.1348742	0.196792979	0.444735766	0.313551956	0.240591113	0.114724814	0.288800328	0.482069507	0.387813813	2.572765265	0.442377128	1.109200189	1.566422754	0.952147366	19.59314033	2.075316028	2.075628936	0.690422961	1.134115087	1.808240868	1.746317944	0.883530051	0.010005	0.049591658	0.046931656	0.338713969	0.163461204	0.042238046	0.954024931	0.075241802	0.044697449	0.278371257	0.038998065	0.050304915	0.150743448	0.079499466	0.892499105	0.124026808	0.114724419	0.281586144	0.205031456
Regorafenib	1.484153372	1.112781738	0.151360643	0.062298069	1.26561353	2.32612879	0.108213549	0.038174695	0.049219368	0.344013003	0.379006713	0.417012422	0.121740045	0.029643214	0.068846395	0.174121362	0.390886211	1.20387723	0.147647342	1.456222852	0.918997112	0.761601488	7.488972141	1.320652639	0.96583127	0.439368847	0.660768894	1.15966176	0.841305828	0.396296077	0.016537346	0.056841538	0.015653468	0.673893716	0.314340442	0.043868443	0.202512831	0.02025365	0.037244689	0.051869433	0.014143371	0.036151807	0.21417708	0.047965377	0.962267036	0.212710412	0.037121601	0.373570309	0.128078486
Ribociclib	0.55322119	0.821196407	0.135867866	0.029216339	0.586418533	1.579308922	0.146442965	0.026852622	0.034123305	0.656856511	0.429938402	0.480887021	0.178956909	0.018528862	0.042772891	0.062660849	0.861064645	0.444803902	0.054099571	0.980783792	0.721816372	0.773342479	5.780397566	1.071511392	0.727952338	0.46593167	0.681272066	0.755710611	0.687943306	0.246077811	0	0.030039292	0.003574697	0.86829912	0.398271598	0.022468504	0.153266717	0.000637317	0.016640552	0.016842441	0.003860734	0.01364253	0.276638025	0.003304183	0.852088876	0.265814711	0.001900321	0.490842006	0.019711702
Rigosertib	0.444123651	0.198646263	0.350373081	0	0.59345442	2.40899731	0.017655662	0.006992225	0.026618958	0.320577823	0.059567122	0.065491065	0.066445217	0.011764566	0.047379519	0.079650749	1.420090109	1.288761971	0.009568972	0.448949756	0.651957176	0.654680494	9.535573557	0.347749021	1.000891995	0.135415327	0.311317488	0.343518694	0.74861593	0.679884855	0.063825596	0.224628275	0.011478421	0.114761801	0.052966985	0	0.024255799	0	0.010883288	0	0.005398635	0.026406654	0.039879552	0.002272614	0.442379251	0.035311323	0.002272614	0.061794816	0.005285049
Rituximab	0.014387527	0.0205119	0	0.005735556	0.044125808	0.02827984	0	0	0	0	0.017603041	0	0	0	0	0	0	0.018599387	0	0.026679839	0.084047289	0.035095432	0.386186659	0	0.04042035	0.003263894	0.034746897	0.025107916	0.013294021	0	0	0.004416649	0	0	0	0.007535852	0.013719115	0	0	0	0	0	0	0	0.004534284	0.009987516	0.028144158	0	0
Romidepsin	0.26772007	0.445936286	0.172730155	0.019657915	0.316155834	1.086860089	0.117186397	0.004960862	0.006226576	0.373479446	0.367305491	0.439696463	0.022965489	0.001852797	0.007891734	0.035665868	0.296207028	0.237521985	0.090697268	0.87835295	0.561707558	0.672262133	3.464776461	0.554423196	0.558248042	0.384199577	0.502878075	0.673414965	0.46587602	0.188690497	0.017422833	0.005132275	0.000703591	0.723016438	0.351599674	0.022626434	0.132375671	0.008889642	0.016079288	0.003128066	0.009173457	0.006357697	0.265593334	0.000424898	0.676752773	0.221589289	0.002016894	0.388077042	0.003903055
Rucaparib	0.038515991	0.078929181	0.023809372	0.004340854	0.112387374	0.232482229	0.008614992	0	0.028142747	0.02721304	0.037055158	0.029534914	0.00279933	0.000546728	0.005989012	0.003231189	0.017547434	0.03949134	0.03282791	0.06260714	0.079246385	0.066999059	0.904328926	0.085766672	0.142297137	0.033541291	0.091342021	0.077974156	0.04921522	0.028233348	0.000283164	0.003918897	0	0.052441663	0.024203844	0	0.01830623	0.013729194	0.002506631	0.002106828	0.0005436	0	0.016135896	0.003436848	0.050427951	0.016135896	0	0.043563766	0.001399297
Ruxolitinib	3.881291626	1.542898205	0.431541679	0.043891811	2.142501568	5.162403386	0.025740118	0.050073738	0.05806641	0.077613656	0.184608672	0.098615477	0.278221997	0.033468286	0.111154103	0.794603883	0.205853026	2.860107414	0.696290593	1.018444144	1.577472288	0.825127889	17.43948456	1.015126862	1.292295749	0.444727405	1.136017239	1.478153476	1.663605707	1.068083396	0.033876772	0.03919273	0.012631156	0.100012383	0.060221482	0.089752688	0.61740205	0.026402228	0.037695349	0.076887694	0.028426435	0.02792203	0.043652797	0.084988171	0.554747814	0.044460695	0.109350073	0.057668256	0.719356127
Selumetinib	7.621253557	4.413461378	0.506174737	0.256668226	7.733543455	9.617252958	0.214307228	0.250290626	0.348603048	0.728864873	1.011807517	0.745707323	0.822852609	0.152338767	0.252800902	0.880981957	0.529900991	5.936591989	0.652279526	3.089761644	2.92185608	2.216879359	33.92062259	5.210811556	3.880769814	1.248785241	2.003219484	4.72167705	2.935124407	1.645602478	0.076398835	0.245695671	0.090333235	1.363802335	0.599830148	0.10518361	0.588155722	0.139961843	0.085881408	0.215079033	0.063608351	0.132948358	0.406110316	0.214244942	3.81411636	0.422967387	0.116522183	0.76501924	0.681081894
Siltuximab	1.909402515	1.573646937	0.364196612	0.111155004	2.205635821	3.987636383	0.090662873	0.098213587	0.073619246	0.31312244	0.760079246	0.357619284	0.162165784	0.052281765	0.159342136	0.163341613	0.985707383	1.656884134	0.627429647	1.660440734	1.29866853	1.399227034	20.50549977	1.566275194	1.912154394	0.635480085	1.318995297	1.503428946	1.143002296	0.618476673	0.01232783	0.062927722	0.023047462	0.568565087	0.283504115	0.176255738	0.474295806	0.0418708	0.030874731	0.112163024	0.034310121	0.041958408	0.190887417	0.137223685	0.854874643	0.196350333	0.10347819	0.325929836	0.131698552
Sonidegib_(LDE225)	0.004967426	0.06036799	0.008916246	0	0.119535139	0.492912731	0	0	0	0.00719818	0	0	0	0	0.01841112	0.029696943	0.014624497	0.234599623	0	0.01232377	0.033112608	0.039019121	1.223372036	0	0.044111085	0.0618555	0.203702655	0.032181108	0.036698478	0.048863945	0.006063031	0	0	0	0	0.023004371	0	0	0	0	0.025557584	0.014492124	0	0	0	0	0	0	0.029696943
Sorafenib	1.735447139	0.986077865	0.145836843	0.061534507	1.50237172	2.17313732	0.034938177	0.056419939	0.069531332	0.136217684	0.199660871	0.15190565	0.178973821	0.048795292	0.084202637	0.20927031	0.204714521	1.330476741	0.193512118	0.590452921	0.641705294	0.438322445	7.777390502	1.074260392	0.93834097	0.25465698	0.443905821	1.133903529	0.776951709	0.434198322	0.014387571	0.06236829	0.017288443	0.221857917	0.102868234	0.033337909	0.166555446	0.025538067	0.028544453	0.071121446	0.017637907	0.033706384	0.079173607	0.058676916	0.669200608	0.074524048	0.040558959	0.139457785	0.147309321
Sunitinib	0.812901781	0.539238405	0.12084529	0.042243057	0.711870151	1.307529298	0.022345992	0.043872276	0.039860288	0.077852568	0.138508663	0.112880676	0.092472004	0.03710553	0.070935265	0.124735182	0.113629015	0.667557555	0.09703343	0.316287634	0.438349224	0.282844797	4.473907934	0.576308153	0.478087801	0.161216092	0.29831151	0.564848597	0.433207779	0.251516625	0.005395116	0.018210098	0.008036598	0.143159159	0.067673796	0.037106546	0.151069751	0.015436382	0.017000423	0.063606664	0.013568598	0.013244623	0.053889263	0.016080347	0.274527644	0.05059628	0.030299061	0.097100438	0.088420453
Tamoxifen	0.637571076	0.726975181	0.156024398	0.014029492	1.347573047	1.6682724	0.157167843	0.023805289	0.02849073	0.418303915	0.434232979	0.491033736	0.111700165	0.020477085	0.028972889	0.115077339	0.170929438	0.845836576	0.073404741	1.053929502	0.785970503	0.758145533	6.115601081	1.258724927	0.818502046	0.787846126	0.759324837	0.754532412	0.802708104	0.275521833	0.022234353	0.025625047	0.002670255	0.859644293	0.392640938	0.13479803	0.139823303	0.023758054	0.02621132	0.004157444	0.018863083	0.048256305	0.287225224	0.056216604	0.935653209	0.258893956	0.006705434	0.450590055	0.091406952
Tecemotide_(Emepepimut-S_L-BLP25)	0.189447071	0.13339426	0.019479265	0.005918885	0.205452364	0.233452212	0	0.008577336	0.005786786	0.001543737	0.026737289	0.003200957	0.011643496	0.005369467	0.008325196	0.00882342	0.036313384	0.195678243	0.04611474	0.073780665	0.158022301	0.025841971	1.348056675	0.118208327	0.167909588	0.012605493	0.093961625	0.112129896	0.101299497	0.05362015	0.000510706	0	0.00174857	0.040031214	0	0.002301513	0.07993515	0.000629753	0.000338723	0.00219073	0.000827553	0.00197166	0.019913321	0.038884995	0.037388884	0.001988626	0.039972589	0.00380036	0.007058423
Temozolomide	0.037305677	0.057529365	0	0	0.031612913	0.1432506	0.015903573	0	0.015146008	0.055920796	0.052303732	0.058684953	0	0	0	0	0	0.008676596	0.00093343	0.119937349	0.065637494	0.083211086	0.450105029	0.064592179	0.070387586	0.047710719	0.083120182	0.059133896	0.059344729	0.021270898	0	0.011756691	0	0.103373225	0.047710719	0	0.015903573	0	0.007519892	0	0	0	0.031807146	0.006211712	0.091876545	0.031807146	0	0.055662506	0
Temsirolimus	1.610815822	2.036617886	0.314640127	0.08403111	1.984134059	3.6278423	0.087458562	0.254046315	0.141148935	0.33805616	0.34821653	0.663046018	0.222260228	0.184613824	0.160135707	0.41756165	0.351986099	2.062839336	0.507449193	1.098952007	1.371995428	0.684591801	14.59190642	2.033803296	2.495806434	0.475768061	0.82127705	1.44680546	1.631199776	1.662408291	0.024414307	0.043141767	0.030021385	0.566759908	0.265472894	0.071695964	0.220123209	0.132223923	0.025376194	0.073832604	0.243358562	0.074431321	0.189543528	0.128742265	1.057332265	0.187557004	0.060961174	0.318505386	0.297492866
Thalidomide	2.23073007	2.048528881	0.664235154	0.133661924	3.123940602	4.831944903	0.202171815	0.089827482	0.119168493	0.573191716	0.857940247	0.663362539	0.191758972	0.070441169	0.170676221	0.280482072	0.32147574	1.976539412	0.454097769	2.513218927	1.566271638	1.571858672	19.46664274	2.240625914	1.761802106	0.848347772	1.749744895	1.789084617	1.288806975	0.65305326	0.02420161	0.055282491	0.038957098	1.098622425	0.521515758	0.106798122	0.400591971	0.045935446	0.025632019	0.067928135	0.045839397	0.078591389	0.347967927	0.062021529	2.156316948	0.359018592	0.0548546	0.625974818	0.210322809
Tivantinib	1.101369917	0.889819433	0.417272691	0.149778003	1.421503116	3.442601989	0.042477177	0.055346797	0.055711936	0.13418217	0.249589023	0.216369075	0.137482826	0.034716084	0.083290136	0.257187693	0.303900478	1.540115104	0.256187623	0.682837899	0.780457528	0.55015307	9.807537091	0.855805432	1.058748973	0.317398717	0.603397262	0.830516327	0.822633213	0.596562114	0.027746003	0.037300861	0.036005918	0.241652053	0.121863604	0.02620286	0.264802228	0.032347765	0.034059573	0.105558788	0.033310517	0.05430223	0.080587956	0.046565275	0.475579438	0.090263213	0.038872218	0.151120607	0.186183259
Tivozanib	1.114208831	0.629363222	0.144016783	0.080068357	0.992831498	2.078315919	0.021104617	0.04648262	0.044958067	0.077392943	0.161607317	0.139506929	0.089196294	0.039650904	0.096266776	0.185542273	0.15023145	0.930255724	0.206740771	0.458627177	0.567750556	0.372818003	7.147595955	0.728097767	0.768496316	0.248773026	0.423329723	0.674676851	0.699907951	0.350778638	0.005932207	0.016530553	0.015643885	0.138122333	0.066125996	0.022207962	0.321887953	0.025080601	0.018142796	0.144276749	0.015304922	0.016768305	0.058007101	0.027331903	0.354686718	0.050756841	0.045759949	0.110513026	0.086931537
Toremifene	1.26178745	1.453950362	0.296880043	0.028058985	2.477499249	3.064193676	0.257283949	0.047610577	0.05698146	0.836607829	0.868465958	0.982067471	0.22340033	0.04095417	0.057945779	0.230154677	0.328504175	1.634621415	0.146809481	2.107859005	1.556340991	1.516291067	11.99606554	2.504095154	1.637004093	1.575692251	1.49195537	1.509064825	1.504612296	0.551043666	0.044468706	0.024555791	0.005340511	1.692594282	0.785281876	0.242901758	0.279646605	0.047516107	0.025728337	0.008314887	0.037726166	0.09651261	0.559281696	0.112433207	1.871306417	0.517787911	0.013410868	0.90118011	0.182813903
Trametinib_(Mekinst)	7.621253557	4.413461378	0.506174737	0.256668226	7.733543455	9.617252958	0.214307228	0.250290626	0.348603048	0.728864873	1.011807517	0.745707323	0.822852609	0.152338767	0.252800902	0.880981957	0.529900991	5.936591989	0.652279526	3.089761644	2.92185608	2.216879359	33.92062259	5.210811556	3.880769814	1.248785241	2.003219484	4.72167705	2.935124407	1.645602478	0.076398835	0.245695671	0.090333235	1.363802335	0.599830148	0.10518361	0.588155722	0.139961843	0.085881408	0.215079033	0.063608351	0.132948358	0.406110316	0.214244942	3.81411636	0.422967387	0.116522183	0.76501924	0.681081894
Trastuzumab	3.181863458	1.929482871	1.065377711	0.148614161	3.435468524	4.769017926	0.111236429	0.093132983	0.069588214	0.38139293	0.512350275	0.423612862	0.516206286	0.074639214	0.121873014	0.406904371	1.235373582	3.434845406	2.093215028	1.055571234	1.404864801	1.005729421	16.80490294	2.294766512	2.550006778	0.607636908	1.212363325	1.603959664	1.418910132	1.113979565	0.090527884	0.069791471	0.076338539	0.708661778	0.331616311	0.136053095	0.395986413	0.062927584	0.028567087	0.072591114	0.060540658	0.061175695	0.226855302	0.04717516	1.170863663	0.238893002	0.064036538	0.478600359	0.293880695
Trebananib	0.84312385	0.579584478	0.085796483	0.032789244	0.664405992	0.971296656	0.015481055	0.025506167	0.013938147	0.055983079	0.147206706	0.063222881	0.050512982	0.014389213	0.065121737	0.070786878	0.102444023	0.675500586	0.079599904	0.324643312	0.297002174	0.390880471	4.643469023	0.545519528	0.41085742	0.135227621	0.305622498	0.381340241	0.294785051	0.224950168	0.002528942	0.010369641	0.005224615	0.089403792	0.045478517	0.014703264	0.162990341	0.006942427	0.029531422	0.038325239	0.004755753	0.009824099	0.02788346	0.051596126	0.210402729	0.028516305	0.018573006	0.052110668	0.055736219
Vandetanib	3.035288247	1.599942631	0.355657817	0.141962989	2.519566432	4.105065519	0.061828807	0.090670814	0.11246241	0.199221484	0.370694763	0.485277099	0.652796206	0.101120955	0.14660766	0.354473717	0.421315394	2.336314831	0.547769234	0.847282752	1.22754625	0.693886082	15.32224091	1.954891032	2.057574018	0.553685429	0.793807696	1.420162089	1.681246104	1.157663961	0.020454698	0.04860006	0.044586777	0.381281808	0.163372414	0.027414563	0.410662522	0.051015791	0.064093757	0.101139392	0.093666324	0.057160544	0.124170075	0.047451285	0.91261137	0.11856677	0.052536859	0.237405606	0.213959485
Veliparib	0.010077723	0.018335235	0.003786438	0.002158279	0.043603241	0.094427204	0.004150136	0	0.03138526	0.012450407	0.026221324	0.014959894	0.001285937	0.000485388	0.003177084	0.001242302	0.018537115	0.016110609	0.013561287	0.025648573	0.025209372	0.044327046	0.443473117	0.01894567	0.045257003	0.01778346	0.035956827	0.038708651	0.020517224	0.009655164	0	0	0	0.026975881	0.012450407	0	0.013239732	0	0	0.001870452	0	0	0.008300271	0.002049416	0.024028664	0.008300271	0	0.014525475	0.001242302
Vemurafenib	6.870101741	4.456903565	0.456132181	0.145224079	5.816626314	7.367551807	0.188894509	0.227555782	0.239969166	0.658487938	1.087369152	0.716478293	0.476641907	0.168429393	0.292633287	0.421253155	0.498264945	5.82105289	0.466347945	2.262322645	2.231981155	1.731840685	26.5104584	5.599185709	3.316649497	1.003860505	1.675078322	4.035177751	1.824456081	1.386902579	0.036182014	0.428170342	0.065668795	1.163968986	0.532673698	0.080682274	0.522528856	0.064712898	0.016355793	0.135602101	0.076159176	0.195113519	0.369257308	0.123767358	2.732286264	0.367466943	0.089841195	0.662262689	0.308340062
Venetoclax	2.753098588	2.570121198	0.301314316	0.10869667	3.355697456	4.59779457	0.170995813	0.134766566	0.098936685	0.524878529	0.83953388	0.578855696	0.209803017	0.077474778	0.168927753	0.370684525	0.487640684	2.514110611	1.124719593	1.871821562	1.949333119	1.416099353	21.30447457	2.413202524	2.355770083	0.87910615	1.766318497	1.958287922	1.30167994	0.920935693	0.014698156	0.091575626	0.010340041	1.010271607	0.473741037	0.263502557	0.622990827	0.026451756	0.040924569	0.103242539	0.027210982	0.073079449	0.311517969	0.1115752	1.505862547	0.31779657	0.067637677	0.57069217	0.311611505
Vinblastine	1.201552298	0.929147435	0.148366456	0.06948511	1.479724522	2.897316139	0.116215463	0.034799654	0.060345337	0.37043771	0.396193499	0.396308016	0.121470832	0.012883542	0.091616596	0.198181854	0.353293549	1.035858085	0.288096607	1.42805992	1.008457313	0.927896352	8.726083096	1.287100788	0.974767174	0.460554713	0.749033371	0.965289	0.843225808	0.424887999	0.019769913	0.024977809	0.020136071	0.681366419	0.324548034	0.067755925	0.20263887	0.014026329	0.021842021	0.030765438	0.037318379	0.112842491	0.231701977	0.023668176	1.025743834	0.214703593	0.028592949	0.376043119	0.111943342
Vincristine	0.005943968	0.008009963	0	0.006761962	0.02842759	0.052443686	0	0	0.000981337	0.004441451	0.000506291	0	0.001007982	0	0.001405057	0.002109746	0.002249935	0.022950711	0.000575039	0.004680598	0.013455954	0.005580406	0.234626493	0.021068022	0.010644282	0.008364308	0.005317542	0.00902177	0.011268324	0.016685679	0.000303152	0	0.002329434	0	0	0	0	0	0.001211372	0	0.001607297	0.015419744	0	0	0.011309592	0	0.00022742	0	0.00038496
Vindesine	0.005943968	0.008009963	0	0.006761962	0.02842759	0.052443686	0	0	0.000981337	0.004441451	0.000506291	0	0.001007982	0	0.001405057	0.002109746	0.002249935	0.022950711	0.000575039	0.004680598	0.013455954	0.005580406	0.234626493	0.021068022	0.010644282	0.008364308	0.005317542	0.00902177	0.011268324	0.016685679	0.000303152	0	0.002329434	0	0	0	0	0	0.001211372	0	0.001607297	0.015419744	0	0	0.011309592	0	0.00022742	0	0.00038496
Vinorelbine	0.005943968	0.008009963	0	0.006761962	0.02842759	0.052443686	0	0	0.000981337	0.004441451	0.000506291	0	0.001007982	0	0.001405057	0.002109746	0.002249935	0.022950711	0.000575039	0.004680598	0.013455954	0.005580406	0.234626493	0.021068022	0.010644282	0.008364308	0.005317542	0.00902177	0.011268324	0.016685679	0.000303152	0	0.002329434	0	0	0	0	0	0.001211372	0	0.001607297	0.015419744	0	0	0.011309592	0	0.00022742	0	0.00038496
Vismodegib	0.004967426	0.06036799	0.008916246	0	0.119535139	0.492912731	0	0	0	0.00719818	0	0	0	0	0.01841112	0.029696943	0.014624497	0.234599623	0	0.01232377	0.033112608	0.039019121	1.223372036	0	0.044111085	0.0618555	0.203702655	0.032181108	0.036698478	0.048863945	0.006063031	0	0	0	0	0.023004371	0	0	0	0	0.025557584	0.014492124	0	0	0	0	0	0	0.029696943
Vorinostat	0.243381882	0.405396624	0.157027414	0.017870832	0.287414394	0.988054626	0.106533088	0.004509874	0.005660523	0.339526769	0.333914082	0.399724057	0.020877718	0.001684361	0.007174304	0.032423517	0.269279117	0.215929077	0.082452062	0.798502682	0.510643234	0.611147394	3.149796783	0.504021088	0.50749822	0.349272343	0.457161886	0.612195423	0.423523655	0.171536815	0.015838939	0.004665704	0.000639628	0.657287671	0.319636068	0.020569486	0.120341519	0.008081493	0.014617535	0.002843696	0.008339506	0.005779725	0.241448485	0.000386271	0.615229793	0.201444809	0.00183354	0.352797311	0.003548232
[truncated: 3,751 more columns]
