# Supplementary material for: Pathway Based Analysis of Mutation Data Is Efficient for Scoring Target Cancer Drugs
Source: Front Pharmacol. 2019 Jan 23;10:1. doi: 10.3389/fphar.2019.00001 (PMC6351482; doi:10.3389/fphar.2019.00001)
Supplement: Supplementary Data Sheet 3 — Mutation drug scores for 3800 TCGA tumor samples for 10 versions of drug scoring algorithm. The dataset contains 10 tables that match the 10 methods of drug scoring. [file Data_Sheet_3.ZIP › MDS_N_m.csv]

	TCGA.AG.3881.01	TCGA.63.6202.01	TCGA.MH.A561.01	TCGA.DZ.6135.01	TCGA.BR.8368.01	TCGA.HU.A4GQ.01	TCGA.36.1571.01	TCGA.19.5953.01	TCGA.41.2573.01	TCGA.CZ.4865.01	TCGA.A4.A57E.01	TCGA.02.0114.01	TCGA.81.5911.01	TCGA.27.2526.01	TCGA.BP.4351.01	TCGA.B8.5159.01	TCGA.IN.8663.01	TCGA.AH.6644.01	TCGA.CM.5344.01	TCGA.AA.3685.01	TCGA.EI.6508.01	TCGA.AA.3697.01	TCGA.AA.3977.01	TCGA.AG.A02X.01	TCGA.DC.4745.01	TCGA.AA.3494.01	TCGA.85.6560.01	TCGA.A6.6782.01	TCGA.D5.6533.01	TCGA.G4.6293.01	TCGA.HT.7873.01	TCGA.DU.7294.01	TCGA.DB.A64R.01	TCGA.FG.6690.01	TCGA.DU.6542.01	TCGA.HT.8109.01	TCGA.DU.A5TW.01	TCGA.HT.7877.01	TCGA.HW.8322.01	TCGA.HT.7695.01	TCGA.DU.6393.01	TCGA.QH.A65Z.01	TCGA.HT.8106.01	TCGA.DB.A64P.01	TCGA.DB.A64X.01	TCGA.DU.5851.01	TCGA.06.6701.01	TCGA.HT.7879.01	TCGA.FG.7634.01
Abemaciclib_(LY2835219)	0.036881413	0.054746427	0.009057858	0.001947756	0.039094569	0.105287261	0.009762864	0.001790175	0.002274887	0.043790434	0.02866256	0.032059135	0.011930461	0.001235257	0.002851526	0.00417739	0.05740431	0.029653593	0.003606638	0.065385586	0.048121091	0.051556165	0.385359838	0.071434093	0.048530156	0.031062111	0.045418138	0.050380707	0.045862887	0.016405187	0	0.002002619	0.000238313	0.057886608	0.02655144	0.0014979	0.010217781	4.24878E-05	0.00110937	0.001122829	0.000257382	0.000909502	0.018442535	0.000220279	0.056805925	0.017720981	0.000126688	0.0327228	0.001314113
Afatinib	0.071388696	0.038568899	0.013637774	0.003855259	0.067135881	0.099604749	0.001749872	0.001872186	0.002394403	0.005605521	0.010173168	0.006336893	0.017783944	0.001700536	0.002967241	0.007547517	0.016333345	0.062916843	0.024289045	0.019907768	0.028558442	0.018229459	0.35957603	0.047190394	0.044794206	0.015389772	0.021312861	0.034454155	0.030961122	0.019007902	0.001289147	0.001375473	0.000993424	0.010699398	0.004623748	0.00143348	0.008126632	0.001086755	0.001457023	0.001326872	0.000939512	0.00113642	0.003055339	0.001109616	0.022064293	0.00326503	0.00087659	0.006754328	0.005473606
Aflibercept	0.044440572	0.034055242	0.00776963	0.002732686	0.045035506	0.099022916	0.002900292	0.002702446	0.002536674	0.009603903	0.013779347	0.012689168	0.003405996	0.002026703	0.009642179	0.011276346	0.014002136	0.037963796	0.010783942	0.028869787	0.031271594	0.024151923	0.364353032	0.036283503	0.04384385	0.015359251	0.026953581	0.040605579	0.034186065	0.015160923	0.000153923	0.001008177	0.000936305	0.018619043	0.008918316	0.000747196	0.019638495	0.001396638	0.000946252	0.006283681	0.000973415	0.001045956	0.005702793	0.001970373	0.026011447	0.006238889	0.003640454	0.01038561	0.003955909
Alectinib	0.047624826	0.043964271	0.006252157	0.002949814	0.052252047	0.098752055	0.002115618	0.002959768	0.002225883	0.007746944	0.014413234	0.009790612	0.004679055	0.002148031	0.005375416	0.003084212	0.013370072	0.046371409	0.012719855	0.026961269	0.029220704	0.028082215	0.399964034	0.042823289	0.044846234	0.017349244	0.033317845	0.047152538	0.022943337	0.015784582	0.000216941	0.002790889	0.000116571	0.014117861	0.006346855	0.002765544	0.015546261	0.000978556	0.000184612	0.003427939	0.000508582	0.001267849	0.004405878	0.001915024	0.020915927	0.004903509	0.002415262	0.007768098	0.002159357
Alemtuzumab	0.010853496	0	0	0	0.063160043	0.096612876	0	0	0	0	0	0	0	0.001680514	0.021690121	0	0.013727242	0.074360386	0	0	0.039884284	0.031822218	0.336806333	0.031715422	0.03299877	0	0.041718213	0.020333627	0	0.019233127	0	0	0	0	0	0	0	0	0	0	0	0.005367687	0	0	0.010206165	0	0	0	0
Alitretinoin	0.036823929	0.012848108	0.007810196	0.00074409	0.033486429	0.067075482	0.000949925	0.000638567	0.00040797	0.006975194	0.007173899	0.003652896	0.005117749	0.000326149	0.003373511	0.004407035	0.002360821	0.026941636	0.005271857	0.030137432	0.029398222	0.015995249	0.370132032	0.02780886	0.028278557	0.008350014	0.015640501	0.017066946	0.013228181	0.025784623	0.000354165	0	0.000485345	0.006230157	0.004307393	0.002634405	0.008369469	0	0	0.000947221	0.000147668	0.003359026	0.006056751	0.00426875	0.015482806	0.00212557	5.41754E-05	0.003743676	0.002330088
Apalutamide_ARN-509	0.025754023	0.020515165	0.010765906	0.000118878	0.037197696	0.104759457	0.002136436	0.000424709	0.000194637	0.009848816	0.006862486	0.009537196	0.002964145	0.000842736	0.000550272	0.015115687	0.007050448	0.019620983	0.009880165	0.0492211	0.025096036	0.02582166	0.292149699	0.042140908	0.037834382	0.012340159	0.017773435	0.02311066	0.042175993	0.045527572	0.000245408	0.000737394	0	0.014532792	0.009326376	0.0004663	0.002637092	0.003717682	0.001032048	0.001047081	0.001196374	0.000930246	0.009520218	0.006132663	0.024977798	0.004435022	0.001640865	0.007477526	0.00235525
Arsenic_trioxide	0.042291814	0.047066205	0.009666647	0.002036582	0.039888799	0.101254453	0.006372108	0.001412415	0.001485921	0.025870397	0.02020824	0.022059047	0.00688362	0.001071271	0.002252294	0.005241436	0.036133788	0.033708427	0.009686266	0.051348791	0.039824311	0.041876349	0.3690485	0.055697408	0.044472414	0.023956067	0.033852987	0.042257163	0.035275386	0.018460981	0.000231102	0.00197872	0.000858107	0.039961896	0.017896289	0.003943482	0.010608558	0.000289247	0.001240803	0.001536444	0.001521615	0.004013277	0.014617613	0.000849603	0.042282061	0.012360456	0.001773229	0.022958533	0.003768676
Atezolizumab	0	0.055320076	0	0	0.031574627	0	0	0	0	0	0	0	0	0	0	0	0.036620615	0	0	0	0.052893261	0	0.344299397	0	0	0	0	0	0	0.036620615	0	0	0	0	0	0	0	0	0	0	0	0	0	0	0	0	0	0	0
Avelumab	0	0.055320076	0	0	0.031574627	0	0	0	0	0	0	0	0	0	0	0	0.036620615	0	0	0	0.052893261	0	0.344299397	0	0	0	0	0	0	0.036620615	0	0	0	0	0	0	0	0	0	0	0	0	0	0	0	0	0	0	0
Axitinib	0.052228539	0.029501401	0.006750787	0.003753204	0.046538976	0.097421059	0.000989279	0.002178873	0.002107409	0.003627794	0.007575343	0.006539387	0.004181076	0.001858636	0.004512505	0.008697294	0.007042099	0.043605737	0.009690974	0.021498149	0.026613307	0.017475844	0.33504356	0.034129583	0.036023265	0.011661236	0.019843581	0.031625477	0.032808185	0.016442749	0.000278072	0.00077487	0.000733307	0.006474484	0.003099656	0.001040998	0.015088498	0.001175653	0.000850444	0.006762973	0.000717418	0.000786014	0.002719083	0.001281183	0.01662594	0.002379227	0.002144998	0.005180298	0.004074916
Belinostat	0.03225543	0.053727263	0.020810862	0.002368424	0.038091064	0.130946999	0.014118843	0.000597694	0.00075019	0.044997524	0.044253674	0.052975477	0.002766926	0.000223229	0.000950811	0.004297093	0.035687594	0.028617107	0.010927382	0.105825657	0.067675609	0.080995438	0.417442947	0.066797975	0.0672588	0.046289106	0.06058772	0.081134333	0.056129641	0.022733795	0.002099137	0.000618346	8.477E-05	0.087110414	0.042361407	0.002726076	0.015948876	0.001071041	0.001937264	0.000376875	0.001105236	0.000765988	0.031999197	5.11925E-05	0.081536479	0.026697505	0.000242999	0.04675627	0.000470248
Bevacizumab	0.044440572	0.034055242	0.00776963	0.002732686	0.045035506	0.099022916	0.002900292	0.002702446	0.002536674	0.009603903	0.013779347	0.012689168	0.003405996	0.002026703	0.009642179	0.011276346	0.014002136	0.037963796	0.010783942	0.028869787	0.031271594	0.024151923	0.364353032	0.036283503	0.04384385	0.015359251	0.026953581	0.040605579	0.034186065	0.015160923	0.000153923	0.001008177	0.000936305	0.018619043	0.008918316	0.000747196	0.019638495	0.001396638	0.000946252	0.006283681	0.000973415	0.001045956	0.005702793	0.001970373	0.026011447	0.006238889	0.003640454	0.01038561	0.003955909
Bexarotene	0.03173867	0.009554503	0.007834386	0.000779523	0.030839451	0.067604401	0.000995159	0.000668975	0.000427397	0.007307346	0.007183948	0.003826844	0.005118619	0.00034168	0.003534155	0.004010833	0.002473241	0.021279413	0.005522898	0.031572547	0.030798138	0.016756927	0.376080631	0.024004007	0.027742643	0.008747634	0.015779227	0.016893611	0.011974702	0.026406402	0.00037103	0	0.000508457	0.006526831	0.004512506	0.002108063	0.008768016	0	0	0.000992327	2.76654E-05	0.003518979	0.006345168	0.004037789	0.014735898	0.002226788	5.67552E-05	0.003921947	0.001834985
Bicalutamide	0.025754023	0.020515165	0.010765906	0.000118878	0.037197696	0.104759457	0.002136436	0.000424709	0.000194637	0.009848816	0.006862486	0.009537196	0.002964145	0.000842736	0.000550272	0.015115687	0.007050448	0.019620983	0.009880165	0.0492211	0.025096036	0.02582166	0.292149699	0.042140908	0.037834382	0.012340159	0.017773435	0.02311066	0.042175993	0.045527572	0.000245408	0.000737394	0	0.014532792	0.009326376	0.0004663	0.002637092	0.003717682	0.001032048	0.001047081	0.001196374	0.000930246	0.009520218	0.006132663	0.024977798	0.004435022	0.001640865	0.007477526	0.00235525
Binimetinib_(MEK162)	0.075457956	0.043697637	0.005011631	0.00254127	0.076569737	0.095220326	0.002121854	0.002478125	0.003451515	0.007216484	0.010017896	0.007383241	0.008147056	0.001508305	0.002502979	0.008722594	0.005246544	0.058778139	0.006458213	0.030591699	0.028929268	0.021949301	0.335847748	0.051592194	0.038423464	0.01236421	0.019833856	0.046749278	0.029060638	0.016293094	0.000756424	0.00243263	0.000894388	0.013502993	0.005938912	0.001041422	0.005823324	0.001385761	0.000850311	0.002129495	0.000629786	0.00131632	0.004020894	0.002121237	0.037763528	0.004187796	0.001153685	0.007574448	0.006743385
Blinatumomab	0.039073695	0.050432542	0.005119585	0.00063438	0.043763797	0.062149779	0.001233652	0.001580516	0.00157476	0.002872717	0.004383901	0.003928689	0.002855135	0.002460199	0.002265089	0.006298314	0.008107598	0.031472725	0.006467081	0.012668304	0.026449907	0.01539434	0.404047803	0.021114978	0.028374337	0.006146009	0.015062245	0.021779631	0.016924733	0.017639806	1.42495E-05	0.000706112	0.000232379	0.006026862	0.002769987	0.000553089	0.00775885	0.00062965	0	0.000640731	0.000834721	0.000406987	0.002136404	0.000679419	0.009998581	0.002338934	0.001796372	0.003320729	0.006483467
Bortezomib	0.012767919	0.036082911	0.002222918	0.000686674	0.036240801	0.112748983	0.008173983	0.002493259	0.002082314	0.037676947	0.025369036	0.029526935	0.00186506	0.002068163	0.003086173	0.00564273	0.020233728	0.009960513	0.003903993	0.053132452	0.036702946	0.036793348	0.431180755	0.045146118	0.055972961	0.02641573	0.063210912	0.038042905	0.032897861	0.01743658	0.000156518	0.024146378	0.000121309	0.053074223	0.024453437	0.000314582	0.014450635	0.000839888	0.000236294	0.001573247	0.000343416	0.001099237	0.017019117	0.000664262	0.049004664	0.016776003	0.000598107	0.028260358	0.000279351
Bosutinib	0.040887017	0.047540898	0.009783918	0.002530942	0.042938493	0.096134469	0.005926956	0.001916593	0.002038893	0.019345023	0.018806266	0.026429413	0.005263778	0.001782164	0.002397609	0.007244305	0.023521812	0.042407609	0.007225801	0.061610969	0.040348045	0.036775684	0.325550847	0.046606252	0.048322206	0.022147918	0.034299746	0.048109709	0.04870632	0.021557728	0.000790188	0.003182368	0.000885297	0.037027873	0.017208817	0.00102513	0.008281377	0.001475472	0.000987469	0.001705731	0.00120251	0.00118666	0.01166535	0.001649316	0.041833432	0.011509725	0.001281388	0.020139084	0.005393644
Brentuximab_vedotin	0.043402629	0.040750573	0.004702738	0.00178937	0.058820015	0.076914764	0.001869555	0.002561216	0.001135196	0.005836065	0.010102488	0.007594949	0.005313821	0.001616839	0.001748067	0.00091899	0.006380598	0.033474537	0.007258485	0.041059626	0.028595353	0.032152155	0.350422645	0.040898627	0.028674425	0.012459129	0.024384918	0.044061092	0.018417181	0.010960958	0	0.001297498	0	0.01225977	0.005608666	0.002589464	0.010181475	0.000288559	0	0.008243167	5.01993E-05	0.000383883	0.004227692	0.006307581	0.020017554	0.004306636	0.011902481	0.006543444	0.000470137
Brigatinib	0.075747664	0.041027921	0.009805011	0.003813736	0.065529488	0.097234166	0.001892719	0.001978071	0.002589864	0.006063114	0.01100363	0.00685419	0.019158429	0.001839356	0.003209465	0.006213682	0.012848385	0.058891319	0.015707076	0.021532892	0.028115005	0.01896627	0.359328525	0.050343526	0.042318284	0.016237629	0.02075493	0.037056342	0.031792942	0.017295134	0.000626164	0.001487757	0.00107452	0.011572819	0.005001196	0.000839221	0.008481489	0.00117547	0.001575963	0.001435188	0.0008424	0.001229189	0.003304755	0.001200197	0.02307527	0.003531563	0.000948149	0.006486492	0.004650262
Cabazitaxel	0.006256808	0.00843154	0	0.007117855	0.029923779	0.05520388	0	0	0.001032986	0.004675212	0.000532938	0	0.001061034	0	0.001479007	0.002220785	0.002368353	0.024158643	0.000605304	0.004926945	0.014164162	0.005874112	0.246975256	0.022176865	0.011204507	0.008804534	0.005597412	0.0094966	0.011861394	0.017563873	0.000319107	0	0.002452035	0	0	0	0	0	0.001275129	0	0.001691891	0.01623131	0	0	0.011904833	0	0.00023939	0	0.000405221
Cabozantinib	0.053107467	0.030946818	0.020832833	0.006995559	0.048659653	0.100810007	0.001551609	0.001958044	0.002396855	0.004506525	0.008287641	0.009093858	0.005560793	0.001805708	0.004799781	0.008996987	0.008909095	0.044257285	0.008363818	0.020288859	0.027698933	0.020122613	0.334788215	0.034101578	0.039217754	0.011163497	0.021652645	0.029097845	0.02964091	0.019681958	0.00031686	0.004196407	0.001615871	0.008274516	0.003949059	0.000973283	0.011961132	0.001221736	0.001912279	0.003977745	0.000771135	0.000753815	0.003119572	0.002105118	0.017719836	0.003037297	0.002260528	0.005650853	0.005784584
Carfilzomib	0.010882741	0.014025168	0.002479409	0.000765906	0.037519659	0.096001312	0.00190298	0.002780942	0.002322581	0.020381824	0.006653769	0.007684347	0.002080259	0.002306797	0.00344227	0.000900144	0.001738284	0.010641873	0.004354454	0.015978191	0.013064884	0.014782489	0.385415294	0.019085623	0.036816177	0.007821235	0.045254937	0.016288859	0.014697231	0.019448493	0.000174578	0.026932499	0.000135306	0.012306167	0.00537568	0.000350879	0.003975936	4.27268E-05	0.000263558	0.000668007	0.000383041	0.000217688	0.004554552	0.000740907	0.011783842	0.004283387	0.000667119	0.006271627	0.000311584
Ceritinib_(Zykadia_LDK378)	0.047624826	0.043964271	0.006252157	0.002949814	0.052252047	0.098752055	0.002115618	0.002959768	0.002225883	0.007746944	0.014413234	0.009790612	0.004679055	0.002148031	0.005375416	0.003084212	0.013370072	0.046371409	0.012719855	0.026961269	0.029220704	0.028082215	0.399964034	0.042823289	0.044846234	0.017349244	0.033317845	0.047152538	0.022943337	0.015784582	0.000216941	0.002790889	0.000116571	0.014117861	0.006346855	0.002765544	0.015546261	0.000978556	0.000184612	0.003427939	0.000508582	0.001267849	0.004405878	0.001915024	0.020915927	0.004903509	0.002415262	0.007768098	0.002159357
Cetuximab	0.075747664	0.041027921	0.009805011	0.003813736	0.065529488	0.097234166	0.001892719	0.001978071	0.002589864	0.006063114	0.01100363	0.00685419	0.019158429	0.001839356	0.003209465	0.006213682	0.012848385	0.058891319	0.015707076	0.021532892	0.028115005	0.01896627	0.359328525	0.050343526	0.042318284	0.016237629	0.02075493	0.037056342	0.031792942	0.017295134	0.000626164	0.001487757	0.00107452	0.011572819	0.005001196	0.000839221	0.008481489	0.00117547	0.001575963	0.001435188	0.0008424	0.001229189	0.003304755	0.001200197	0.02307527	0.003531563	0.000948149	0.006486492	0.004650262
Cobimetinib	0.075457956	0.043697637	0.005011631	0.00254127	0.076569737	0.095220326	0.002121854	0.002478125	0.003451515	0.007216484	0.010017896	0.007383241	0.008147056	0.001508305	0.002502979	0.008722594	0.005246544	0.058778139	0.006458213	0.030591699	0.028929268	0.021949301	0.335847748	0.051592194	0.038423464	0.01236421	0.019833856	0.046749278	0.029060638	0.016293094	0.000756424	0.00243263	0.000894388	0.013502993	0.005938912	0.001041422	0.005823324	0.001385761	0.000850311	0.002129495	0.000629786	0.00131632	0.004020894	0.002121237	0.037763528	0.004187796	0.001153685	0.007574448	0.006743385
Crizotinib	0.046510908	0.035575917	0.022922773	0.00759971	0.055772498	0.100665716	0.002546632	0.002189877	0.002863974	0.007393187	0.011753666	0.011592227	0.00665898	0.001626501	0.004203943	0.006017008	0.011047493	0.044957861	0.009324462	0.027254599	0.031538213	0.023993497	0.350674418	0.04044928	0.040965091	0.018674161	0.023887574	0.036738834	0.022813845	0.018526592	0.000757444	0.001867085	0.001614032	0.013593928	0.006445818	0.001328298	0.009568347	0.001276146	0.001310407	0.002816303	0.000939136	0.00141878	0.004416712	0.001837467	0.021719432	0.004655328	0.001496206	0.007797541	0.004222126
CYT387_(Momelotinib)	0.071875771	0.028572189	0.007991513	0.000812811	0.039675955	0.095600063	0.000476669	0.000927291	0.001075304	0.00143729	0.003418679	0.001826213	0.005152259	0.000619783	0.002058409	0.014714887	0.003812093	0.052964952	0.01289427	0.018860077	0.02921245	0.015280146	0.322953418	0.018798646	0.023931403	0.008235693	0.021037356	0.027373213	0.030807513	0.019779322	0.000627348	0.000725791	0.00023391	0.001852081	0.001115213	0.001662087	0.011433371	0.00048893	0.000698062	0.001423846	0.000526415	0.000517075	0.000808385	0.001573855	0.010273108	0.000823346	0.002025001	0.001067931	0.01332141
Dabrafenib	0.08208606	0.046100425	0.004647409	0.002349618	0.066801056	0.088378313	0.001725492	0.002059509	0.003122233	0.006658837	0.009266101	0.006609486	0.007781716	0.001745815	0.002633687	0.008103981	0.006934061	0.060451189	0.005684153	0.027577558	0.026989484	0.017859348	0.328953306	0.051421508	0.042511121	0.010693158	0.018858076	0.056367464	0.031954684	0.018223088	0.000723163	0.002720727	0.00091499	0.010850239	0.005065891	0.001217629	0.005438773	0.001200119	0.000675527	0.00194117	0.00078948	0.00157234	0.003702849	0.002723365	0.034130682	0.003554454	0.001490654	0.006294965	0.005959548
Daratumumab	0.020386577	0.01799139	0.001020247	0.002515648	0.047787316	0.069667814	0	0	0.003347215	0.010397172	0.003608225	0	0.001858396	0	0.001017284	0.003155944	0.00038559	0.042076727	0.005207926	0.02199938	0.032697222	0.010874092	0.395273557	0.010034186	0.056369963	0.006354204	0.027742817	0.027676705	0.009693631	0.018727813	0.000409556	0.00088333	0.001174205	0	0	0.00150717	0.002743823	0.007357622	0	0	0	0.001755479	0	0	0.005395622	0.001997503	0.008894602	0.00255203	0.000826008
Dasatinib	0.048868096	0.049114062	0.008004729	0.002860794	0.046096817	0.092409521	0.004557469	0.002194458	0.002008168	0.014938793	0.015294017	0.020199277	0.005242431	0.002020374	0.002505672	0.007920163	0.019217946	0.047305688	0.007245619	0.048905051	0.041914008	0.032109082	0.330438778	0.041504503	0.043533147	0.01905723	0.030622483	0.041347388	0.04301594	0.021799438	0.000646224	0.002611881	0.000925595	0.028944077	0.013310401	0.001045543	0.010886927	0.001292653	0.000774872	0.001503622	0.001206395	0.001096081	0.008993412	0.001255656	0.033391466	0.009111879	0.001644039	0.0157747	0.006688155
Degarelix	0.044730019	0.0461359	0.006126088	0	0.06403084	0.083418431	0	0.003436273	0.004706775	0.003687289	0.00106889	0	0.007253883	0.004128149	0.002340984	0.004052703	0.002914535	0.055187347	0.001628397	0.013170124	0.013244089	0.017087539	0.425590185	0.055562822	0.017939001	0.006355962	0.028763987	0.033970945	0.012756685	0.016797353	0.002470213	0.000422195	0	0	0.004222797	0.004971841	0.004636616	0.003766174	0	0.000854208	0.000272081	0.002348008	0.00885098	0.001775303	0.005701998	0	0.001155097	0	0.003775467
Denileukin_diftitox_(Ontac)	0.100845309	0.046548258	0.003261132	0.003274499	0.045934742	0.086649939	0.001356362	0.000817819	0.00063469	0.003779485	0.008240262	0.003794034	0.006032854	0.0008963	0.002405403	0.00724726	0.005189964	0.060223581	0.008572445	0.019757994	0.050908299	0.017272858	0.406863449	0.026015459	0.034885387	0.023604489	0.023531168	0.027440679	0.034974626	0.013535885	0.000310844	0.000726749	0.000186406	0.006447737	0.002962925	0.001982501	0.034237452	0.000410527	0.000196298	0.001846389	0.000774399	0.000485512	0.00197796	0.001441263	0.012685813	0.002376724	0.002625772	0.00419858	0.006766196
Denosumab	0.036119866	0.032088693	0.004308935	0.003502964	0.057493139	0.058979053	0.002378015	0.002650064	0.001577986	0.002493645	0.011840966	0.003197022	0.001657649	0.000627534	0.002364851	0.003165864	0.006721337	0.039827599	0.015078976	0.024537172	0.018215914	0.028232569	0.334930004	0.033631745	0.031542041	0.006369187	0.024560768	0.027090386	0.013083116	0.016261412	0.00052115	0.000597471	0.001295608	0.00513096	0.002322534	0.000898369	0.007089614	0.000213695	3.57628E-05	0.002332186	0.001214152	0.000224846	0.001687951	0.00664556	0.010175007	0.002360853	0.00176211	0.00315989	0.003459393
Docetaxel	0.015695605	0.026803997	0.000339241	0.004588735	0.037474865	0.094679803	0.00337529	0.004930482	0.003350169	0.014022433	0.011365631	0.012141414	0.001666169	2.56868E-05	0.001999854	0.00247422	0.002753381	0.031561242	0.006943243	0.029481373	0.037294827	0.025435218	0.341531119	0.038011304	0.023633576	0.017774571	0.018931152	0.025623996	0.021300083	0.027562596	0.000922528	0	0.00150286	0.021939385	0.014757229	0.000881586	0.004929171	0	0.000430457	9.89845E-05	0.001220863	0.008114231	0.00675058	2.82699E-05	0.028677955	0.00675058	0.000432315	0.011869768	0.001319968
Dovitinib	0.053077979	0.039182192	0.023303133	0.002907714	0.054683682	0.090974267	0.001244332	0.002925001	0.00255217	0.004007084	0.007059395	0.00697784	0.005472249	0.002080346	0.004746059	0.008284234	0.009048806	0.045070288	0.012812627	0.027930023	0.030072592	0.020529792	0.310286406	0.03937596	0.033854798	0.009180126	0.021205347	0.033499156	0.032207724	0.019404726	0.00031778	0.000926137	0.000632696	0.007157958	0.00338369	0.001855327	0.007922579	0.002248519	0.00118173	0.003684385	0.000649794	0.001046182	0.002825738	0.001356904	0.015910987	0.002919258	0.002207009	0.004939234	0.006050455
Durvalumab	0.035004369	0.055632636	0.007626172	0.001754463	0.037759917	0.064603139	0.000677406	0.001512051	0.001261118	0.002232456	0.005387451	0.003339831	0.00221647	0.001364153	0.001457253	0.008195017	0.005775292	0.037152597	0.005980823	0.014207853	0.01814986	0.010008437	0.354107822	0.023433811	0.02941245	0.004596478	0.015181484	0.018866076	0.019394478	0.015373731	0.000217447	0.000528924	0.000882705	0.004458314	0.002032217	0.000738892	0.008610607	0.000128805	0	0.001066254	0.000516636	0.00019674	0.001476957	0.001306303	0.006618716	0.001556062	0.001013012	0.003281286	0.00739004
Elotuzumab	0.011179136	0.014744376	0	0	0.017355259	0.04416266	0	0.006286508	0	0	0	0.003050726	0.010066534	0	0.003016591	0	0.000906428	0.018333688	0.003331777	0	0.003121908	0.01862389	0.292660599	0.016214923	0.003314935	0.004619818	0.015566308	0.006853302	0.006763789	0.007890715	0	0.001778651	0	0	0	0	0	0	0	0	0	0	0	0	0.001812806	0.004022122	0.00849146	0	0.00634004
Enzalutamide	0.025754023	0.020515165	0.010765906	0.000118878	0.037197696	0.104759457	0.002136436	0.000424709	0.000194637	0.009848816	0.006862486	0.009537196	0.002964145	0.000842736	0.000550272	0.015115687	0.007050448	0.019620983	0.009880165	0.0492211	0.025096036	0.02582166	0.292149699	0.042140908	0.037834382	0.012340159	0.017773435	0.02311066	0.042175993	0.045527572	0.000245408	0.000737394	0	0.014532792	0.009326376	0.0004663	0.002637092	0.003717682	0.001032048	0.001047081	0.001196374	0.000930246	0.009520218	0.006132663	0.024977798	0.004435022	0.001640865	0.007477526	0.00235525
Erlotinib	0.075129901	0.040613498	0.00970597	0.003775214	0.065255763	0.097032891	0.0018736	0.00195809	0.002563704	0.006001871	0.010892483	0.006784956	0.01896491	0.001820776	0.003177046	0.006228346	0.012718603	0.058663987	0.01567225	0.021840436	0.028224492	0.019326861	0.358864736	0.050682277	0.042157558	0.016196257	0.020688806	0.036682036	0.032032316	0.01740581	0.000619839	0.001472729	0.001063666	0.011455921	0.004950679	0.000830744	0.008395817	0.001163597	0.001560044	0.001420691	0.000833891	0.001216773	0.003271373	0.001605369	0.022842186	0.003495891	0.000938571	0.006420972	0.00460329
Estramustine	0.038584133	0.046914181	0.00898304	0.000902848	0.082200073	0.105962307	0.010238488	0.001423561	0.001648612	0.027675486	0.029004763	0.03249379	0.006466472	0.00119287	0.002334439	0.006670823	0.010175837	0.050732628	0.006689268	0.068774291	0.051514075	0.049677981	0.381391279	0.080587046	0.052563822	0.049131272	0.04876233	0.048120117	0.050595922	0.017647498	0.001270534	0.001464288	0.000152586	0.057296076	0.02620903	0.007765367	0.010623666	0.001357603	0.00149779	0.00032524	0.00107789	0.002757503	0.018927807	0.003237416	0.060548169	0.017308877	0.000443456	0.030149143	0.005281484
Everolimus	0.02928756	0.037029416	0.00572073	0.001527838	0.036075165	0.065960769	0.001590156	0.004619024	0.002566344	0.006146476	0.00633121	0.012055382	0.004041095	0.003356615	0.002911558	0.00759203	0.006399747	0.03750617	0.009226349	0.019980946	0.024945371	0.012447124	0.26530739	0.036978242	0.045378299	0.008650328	0.01493231	0.026305554	0.029658178	0.030225605	0.000443896	0.000784396	0.000545843	0.010304726	0.00482678	0.001303563	0.00400224	0.002404071	0.000461385	0.001342411	0.004424701	0.001353297	0.003446246	0.002340768	0.019224223	0.003410127	0.001108385	0.005791007	0.005408961
Exemestane	0.009542624	0.001834243	0.003160157	0	0.019401257	0.122567908	0	0.024484318	0.006181092	0.003088822	0	0	0	0	0	0	0.002021672	0.020771183	0.025838994	0.005220406	0.017680377	0.005088063	0.359173632	0.006651767	0.019922878	0.024828604	0.008883626	0.004864722	0.010521886	0.013277617	0.002147324	0	0	0	0.003065642	0	0	0	0	0	0	0	0.003160157	0	0.022761805	0	0	0	0
Flavopiridol_(Alvociclib)	0.047751549	0.042215127	0.007630125	0.005690931	0.041004632	0.098902661	0.006297399	0.001843872	0.001455643	0.026342664	0.021206505	0.022631384	0.009870753	0.000872533	0.001759906	0.0037612	0.012529552	0.036725676	0.008060686	0.05090338	0.042590482	0.039709082	0.368038589	0.04486198	0.053415693	0.02421267	0.034967063	0.042458757	0.042660952	0.01694291	0.000297506	0.001502877	0.001217881	0.040017079	0.018401384	0.00108333	0.008951573	0.000779189	0.001289959	0.000728451	0.000791944	0.001206593	0.012589634	0.000545845	0.044550117	0.012200134	0.000594522	0.021748024	0.002345724
Foretinib	0.068028613	0.035810577	0.01607273	0.0040196	0.063472418	0.097132422	0.001194554	0.002473699	0.002719415	0.004041364	0.008182115	0.006922259	0.012063139	0.001867632	0.00428205	0.009174182	0.011723575	0.053665318	0.014554766	0.02011752	0.028245631	0.017311233	0.32757422	0.042747601	0.037397209	0.010368438	0.018756492	0.0341488	0.031207804	0.018343091	0.000419888	0.001169187	0.00103345	0.007474197	0.003367266	0.001622144	0.007574738	0.000836324	0.001576546	0.003189847	0.000610319	0.00097216	0.002530961	0.001221179	0.019157967	0.002454745	0.001532498	0.004759579	0.006894171
Fulvestrant	0.038640671	0.044059102	0.009456024	0.000850272	0.081671094	0.101107418	0.009525324	0.001442745	0.001726711	0.025351752	0.02631715	0.02975962	0.006769707	0.001241035	0.001755933	0.006974384	0.01035936	0.051262823	0.004448772	0.063874515	0.047634576	0.045948214	0.37064249	0.076286359	0.049606185	0.04774825	0.046019687	0.045729237	0.048648976	0.016698293	0.001347537	0.001553033	0.000161834	0.052099654	0.02379642	0.008169578	0.00847414	0.001439882	0.001588565	0.000251966	0.001143217	0.002924625	0.017407589	0.003407067	0.056706255	0.015690543	0.00040639	0.027308488	0.005539815
Ganetespib_(STA-9090)	0.034761799	0.05206491	0.004573604	0.00285448	0.028079046	0.088876751	0.009416951	0.001825786	0.001597511	0.026048811	0.026087305	0.037572992	0.005014306	0.002026314	0.009438736	0.012360863	0.018092125	0.029861109	0.00587826	0.072538922	0.050698754	0.03813225	0.314037251	0.049891315	0.063973318	0.027978025	0.037376517	0.04053874	0.055451143	0.028749223	0	0.001354322	0.000396887	0.056076061	0.025868088	0.002519403	0.012382074	0.000516574	0.001296656	0.000854826	0.002871363	0.001515455	0.017180306	0.000325822	0.060424954	0.017103373	0.000439914	0.030643809	0.003654363
Gefitinib	0.075747664	0.041027921	0.009805011	0.003813736	0.065529488	0.097234166	0.001892719	0.001978071	0.002589864	0.006063114	0.01100363	0.00685419	0.019158429	0.001839356	0.003209465	0.006213682	0.012848385	0.058891319	0.015707076	0.021532892	0.028115005	0.01896627	0.359328525	0.050343526	0.042318284	0.016237629	0.02075493	0.037056342	0.031792942	0.017295134	0.000626164	0.001487757	0.00107452	0.011572819	0.005001196	0.000839221	0.008481489	0.00117547	0.001575963	0.001435188	0.0008424	0.001229189	0.003304755	0.001200197	0.02307527	0.003531563	0.000948149	0.006486492	0.004650262
Goserelin	0.028314975	0.03971694	0.008075873	0.00096561	0.045239624	0.074363817	0.003401361	0.005363047	0.007183538	0.003818221	0.000458096	0	0.007162436	0.003354882	0.001003279	0.001736873	0.003918519	0.040454946	0.009300895	0.008471125	0.021703672	0.021878135	0.415424975	0.034664531	0.016670145	0.008557525	0.029193144	0.040418212	0.013169791	0.012969989	0.002650775	0.000180941	0	0	0.00180977	0.00599928	0.005586445	0.002849489	0	0.000366089	0.000116606	0.002578394	0.003793277	0.000760844	0.002992067	0	0.001043396	0	0.001618057
Homoharringtonine_(Omacetaxine_mepesuccinate)	0.031778214	0.001643888	0.009048967	0.001674874	0.00139686	0.07215875	0	0	0	0.000763266	0	0	0	0	0	0.000943058	0	0.001868359	0	0.020643928	0.052948364	0.000540909	0.368292625	0.015929382	0.040558915	0.000463581	0.002869585	0.006172745	0	0.02785014	8.59436E-05	0	0	0	0	0	0	0	0	0	0	0	0	0	0	0	8.59436E-05	0	0
Ibritumomab_tiuxetan	0.061110875	0.03211373	0.000456387	0.000716945	0.092506805	0.093816423	0.002657357	0.001052401	0.007507896	0.007972072	0.010172452	0.00930075	0.003270767	0.001052401	0.001052401	0.021922926	0	0.052847755	0.001897496	0.03095383	0.03471281	0.019797981	0.303542931	0.034007271	0.039415107	0.009142663	0.041942346	0.035161978	0.022410327	0.02393317	0	0.000552081	0	0.017272822	0.007972072	0.000941981	0.004372247	0.000716982	0	0	0	0	0.005314714	0	0.025327751	0.006563154	0.00351802	0.00930075	0.021922926
Ibrutinib	0.066231628	0.038724555	0.003723937	0.002050915	0.07716255	0.077412342	0.001397909	0.002766712	0.003808878	0.0018846	0.007148899	0.002079452	0.003963958	0.002100705	0.003419301	0.006786829	0.005368117	0.047495197	0.009451453	0.02492214	0.02245049	0.028985432	0.328296607	0.035027175	0.029245826	0.005701482	0.022578047	0.024933602	0.017444957	0.018346569	0.000104091	0.001395937	0.000775532	0.003356845	0.001470574	0.000774602	0.007377137	0.000486966	0.000564391	0.002236304	0.000590413	0.000520949	0.00126208	0.002660116	0.010290357	0.001751416	0.001420799	0.001958312	0.006619619
Idelalisib	0.068076966	0.039408512	0.008026883	0.002428783	0.057973848	0.116729189	0.002024548	0.003603514	0.003365255	0.005189738	0.008884081	0.005984038	0.006587608	0.002889044	0.004521622	0.022987222	0.007977936	0.065951776	0.01192336	0.026219762	0.026768594	0.020362618	0.331339662	0.042360831	0.036929012	0.009133662	0.035749498	0.031238932	0.027505952	0.03180787	0.000760408	0.00082396	0.000885671	0.009686549	0.004527204	0.000739202	0.006480766	0.001302672	0.001065905	0.00178621	0.000727152	0.000850477	0.00314055	0.002563402	0.019200624	0.003283359	0.001582413	0.005747596	0.020932138
Imatinib	0.057068322	0.061246681	0.007306462	0.002396818	0.052769287	0.098430239	0.006469313	0.002825023	0.002090188	0.020925274	0.021689776	0.0251758	0.005491328	0.002056953	0.002593119	0.007668426	0.028087792	0.053174467	0.007221591	0.062376086	0.051287629	0.041560776	0.366789783	0.051261342	0.045889165	0.025266493	0.038385507	0.052641528	0.043622646	0.018782031	0.000512362	0.003024119	0.000733513	0.040980103	0.019034525	0.001254736	0.014059911	0.002036795	0.001908472	0.001434331	0.000651512	0.000993399	0.012939742	0.000754939	0.042788836	0.013280832	0.001360572	0.022717	0.007223196
Inotuzumab_ozogamicin	0.055400539	0.026135953	0.006459556	0.001433889	0.06062055	0.061873233	0	0.001571627	0.00091797	0	0.00440076	0.000762681	0.004634827	0	0.000754148	0.005286568	0.000226607	0.03149949	0.000832944	0.018211973	0.029379131	0.015661798	0.294895822	0.028616471	0.023816349	0.001970928	0.023992794	0.021171214	0.011861	0.011922257	0	0.004880983	0	0	0	0.001883963	0.003429779	0	0	0	0	0	0	0	0.014533083	0.003502409	0.009158905	0	0.006871578
Ipilimumab	0.021631699	0.066329332	0.002070676	0	0.047838007	0.069475549	0	0	0	0	0.002516103	0	0.000679008	0	0	0.019017879	0.002223579	0.035073677	0.002634179	0.022790366	0.006966082	0.001696249	0.385787181	0.020434917	0.031043666	0.000928388	0.020706224	0.00354142	0.007932089	0.029024731	0	0	0	0	0	0	0.002396289	0	0	0	0	0	0	0	0.00415007	0	0	0	0.019017879
Ixabepilone	0.006256808	0.00843154	0	0.007117855	0.029923779	0.05520388	0	0	0.001032986	0.004675212	0.000532938	0	0.001061034	0	0.001479007	0.002220785	0.002368353	0.024158643	0.000605304	0.004926945	0.014164162	0.005874112	0.246975256	0.022176865	0.011204507	0.008804534	0.005597412	0.0094966	0.011861394	0.017563873	0.000319107	0	0.002452035	0	0	0	0	0	0.001275129	0	0.001691891	0.01623131	0	0	0.011904833	0	0.00023939	0	0.000405221
Ixazomib_(MLN9708)	0.010882741	0.014025168	0.002479409	0.000765906	0.037519659	0.096001312	0.00190298	0.002780942	0.002322581	0.020381824	0.006653769	0.007684347	0.002080259	0.002306797	0.00344227	0.000900144	0.001738284	0.010641873	0.004354454	0.015978191	0.013064884	0.014782489	0.385415294	0.019085623	0.036816177	0.007821235	0.045254937	0.016288859	0.014697231	0.019448493	0.000174578	0.026932499	0.000135306	0.012306167	0.00537568	0.000350879	0.003975936	4.27268E-05	0.000263558	0.000668007	0.000383041	0.000217688	0.004554552	0.000740907	0.011783842	0.004283387	0.000667119	0.006271627	0.000311584
Lapatinib	0.071388696	0.038568899	0.013637774	0.003855259	0.067135881	0.099604749	0.001749872	0.001872186	0.002394403	0.005605521	0.010173168	0.006336893	0.017783944	0.001700536	0.002967241	0.007547517	0.016333345	0.062916843	0.024289045	0.019907768	0.028558442	0.018229459	0.35957603	0.047190394	0.044794206	0.015389772	0.021312861	0.034454155	0.030961122	0.019007902	0.001289147	0.001375473	0.000993424	0.010699398	0.004623748	0.00143348	0.008126632	0.001086755	0.001457023	0.001326872	0.000939512	0.00113642	0.003055339	0.001109616	0.022064293	0.00326503	0.00087659	0.006754328	0.005473606
Lenalidomide	0.036119866	0.032088693	0.004308935	0.003502964	0.057493139	0.058979053	0.002378015	0.002650064	0.001577986	0.002493645	0.011840966	0.003197022	0.001657649	0.000627534	0.002364851	0.003165864	0.006721337	0.039827599	0.015078976	0.024537172	0.018215914	0.028232569	0.334930004	0.033631745	0.031542041	0.006369187	0.024560768	0.027090386	0.013083116	0.016261412	0.00052115	0.000597471	0.001295608	0.00513096	0.002322534	0.000898369	0.007089614	0.000213695	3.57628E-05	0.002332186	0.001214152	0.000224846	0.001687951	0.00664556	0.010175007	0.002360853	0.00176211	0.00315989	0.003459393
Lenvatinib	0.074152604	0.041964779	0.007555552	0.006158111	0.061577186	0.098015094	0.00156814	0.002273174	0.00195873	0.005267112	0.014194949	0.007222035	0.005312066	0.001865003	0.011509827	0.00920346	0.016078442	0.055988241	0.011284915	0.023073497	0.027853671	0.019474067	0.340059611	0.051309537	0.036181277	0.011818251	0.021730833	0.038014297	0.031419235	0.023562066	0.000312448	0.004058099	0.000563972	0.010046257	0.004749038	0.001911927	0.009789426	0.001083255	0.001837177	0.004198283	0.000884345	0.001063925	0.00370229	0.001483211	0.019455503	0.003479082	0.002137515	0.006518802	0.006542299
Letrozole	0.009542624	0.001834243	0.003160157	0	0.019401257	0.122567908	0	0.024484318	0.006181092	0.003088822	0	0	0	0	0	0	0.002021672	0.020771183	0.025838994	0.005220406	0.017680377	0.005088063	0.359173632	0.006651767	0.019922878	0.024828604	0.008883626	0.004864722	0.010521886	0.013277617	0.002147324	0	0	0	0.003065642	0	0	0	0	0	0	0	0.003160157	0	0.022761805	0	0	0	0
Leuprolide	0.044730019	0.0461359	0.006126088	0	0.06403084	0.083418431	0	0.003436273	0.004706775	0.003687289	0.00106889	0	0.007253883	0.004128149	0.002340984	0.004052703	0.002914535	0.055187347	0.001628397	0.013170124	0.013244089	0.017087539	0.425590185	0.055562822	0.017939001	0.006355962	0.028763987	0.033970945	0.012756685	0.016797353	0.002470213	0.000422195	0	0	0.004222797	0.004971841	0.004636616	0.003766174	0	0.000854208	0.000272081	0.002348008	0.00885098	0.001775303	0.005701998	0	0.001155097	0	0.003775467
Lomustine	0.037305677	0.057529365	0	0	0.031612913	0.1432506	0.015903573	0	0.015146008	0.055920796	0.052303732	0.058684953	0	0	0	0	0	0.008676596	0.00093343	0.119937349	0.065637494	0.083211086	0.450105029	0.064592179	0.070387586	0.047710719	0.083120182	0.059133896	0.059344729	0.021270898	0	0.011756691	0	0.103373225	0.047710719	0	0.015903573	0	0.007519892	0	0	0	0.031807146	0.006211712	0.091876545	0.031807146	0	0.055662506	0
Masitinib	0.05730839	0.04681686	0.009067128	0.002719744	0.054977952	0.093149858	0.003771926	0.002752609	0.002288595	0.012607017	0.013393479	0.016750672	0.006548626	0.001723947	0.002271772	0.008048139	0.016689614	0.052127468	0.009935674	0.043440684	0.03863798	0.028654387	0.330550804	0.043931436	0.041305484	0.016972332	0.027921333	0.040492748	0.038632465	0.022210104	0.000684805	0.002639738	0.001014747	0.024101099	0.011416087	0.0011784	0.00895621	0.001146324	0.000757153	0.001258127	0.001078809	0.001162498	0.007447212	0.00110548	0.031515694	0.007610764	0.001523281	0.013262936	0.006779602
Medroxyprogesterone_acetate_(MPA)	0.036136619	0.042196506	0.009800636	0.000779416	0.085597379	0.098364668	0.008731547	0.001322516	0.001582818	0.023583189	0.024124054	0.027279652	0.006205565	0.001212821	0.001609605	0.006513843	0.009585932	0.051773006	0.004078041	0.059176441	0.044990239	0.049746452	0.370346544	0.071433725	0.046972646	0.044360307	0.042184713	0.042789098	0.045643102	0.016169514	0.001330678	0.001423614	0.000148348	0.047758016	0.021813385	0.007488779	0.007767961	0.001319892	0.001456184	0.000230969	0.001047949	0.002680906	0.015956957	0.003123145	0.055787705	0.014382998	0.000372524	0.025032781	0.005078164
Megestrol	0.009547103	0.009303406	0.006516457	0	0.099601331	0.070496213	0	0	0	0.001769567	0	0.000540613	0	0.000386769	0	0.003185243	0.001070973	0.047365661	0.005355262	0.015701826	0.02961746	0.072834338	0.400536312	0.063477162	0.023622562	0.022755381	0.00528743	0.004477531	0.022868799	0.013889725	0.000490817	0	0	0	0	0	0	0	0	0	0	0	0.000691584	0.011407849	0.019578707	0	0	0	0
Methyltestosterone	0.025754023	0.020515165	0.010765906	0.000118878	0.037197696	0.104759457	0.002136436	0.000424709	0.000194637	0.009848816	0.006862486	0.009537196	0.002964145	0.000842736	0.000550272	0.015115687	0.007050448	0.019620983	0.009880165	0.0492211	0.025096036	0.02582166	0.292149699	0.042140908	0.037834382	0.012340159	0.017773435	0.02311066	0.042175993	0.045527572	0.000245408	0.000737394	0	0.014532792	0.009326376	0.0004663	0.002637092	0.003717682	0.001032048	0.001047081	0.001196374	0.000930246	0.009520218	0.006132663	0.024977798	0.004435022	0.001640865	0.007477526	0.00235525
Midostaurin	0.050542383	0.050311959	0.005535476	0.002776821	0.05304703	0.093627658	0.004209941	0.00301304	0.002391005	0.013607508	0.020539133	0.016264786	0.004349515	0.002639016	0.005427127	0.003377791	0.012618121	0.04720376	0.009717053	0.039423059	0.037690957	0.034033356	0.398033783	0.051334998	0.049677828	0.021391028	0.038482416	0.049469906	0.031510005	0.016961462	0.001212315	0.003905691	0.000722991	0.027411445	0.012857699	0.006376038	0.013853662	0.002856825	0.000901653	0.003506407	0.001514781	0.002344693	0.008919994	0.002713935	0.032591129	0.01018863	0.003922199	0.015667499	0.003228528
Mogamulizumab	0.033580082	0.03192205	0.003943301	0.001153064	0.044871939	0.109877484	0.002049152	0.001712064	0.002095879	0.005909635	0.008057002	0.008501685	0.00388015	0.000646735	0.001713108	0.001508491	0.006542017	0.053135359	0.006274465	0.031553937	0.024397227	0.029509899	0.324500165	0.032419061	0.023478062	0.013497049	0.017180623	0.045021201	0.020580366	0.01681826	0.00069852	0.000518999	0	0.011477642	0.00640218	0.001529366	0.013688844	0.003188024	0	0.006138409	0.000312499	0.000588533	0.004687327	0.007009175	0.022774236	0.003745342	0.006658057	0.006366686	0.001127966
Moxetumomab_pasudotox	0.055400539	0.026135953	0.006459556	0.001433889	0.06062055	0.061873233	0	0.001571627	0.00091797	0	0.00440076	0.000762681	0.004634827	0	0.000754148	0.005286568	0.000226607	0.03149949	0.000832944	0.018211973	0.029379131	0.015661798	0.294895822	0.028616471	0.023816349	0.001970928	0.023992794	0.021171214	0.011861	0.011922257	0	0.004880983	0	0	0	0.001883963	0.003429779	0	0	0	0	0	0	0	0.014533083	0.003502409	0.009158905	0	0.006871578
Necitumumab	0.075747664	0.041027921	0.009805011	0.003813736	0.065529488	0.097234166	0.001892719	0.001978071	0.002589864	0.006063114	0.01100363	0.00685419	0.019158429	0.001839356	0.003209465	0.006213682	0.012848385	0.058891319	0.015707076	0.021532892	0.028115005	0.01896627	0.359328525	0.050343526	0.042318284	0.016237629	0.02075493	0.037056342	0.031792942	0.017295134	0.000626164	0.001487757	0.00107452	0.011572819	0.005001196	0.000839221	0.008481489	0.00117547	0.001575963	0.001435188	0.0008424	0.001229189	0.003304755	0.001200197	0.02307527	0.003531563	0.000948149	0.006486492	0.004650262
Nilotinib	0.046004441	0.080808285	0.011776478	0.004130314	0.047884552	0.129369221	0.015864766	0.001753854	0.001674766	0.051738317	0.052565897	0.062333636	0.005670319	0.001893571	0.002991331	0.003340006	0.065981045	0.063253799	0.006595227	0.123841956	0.080483434	0.077943982	0.462061515	0.087083711	0.081246146	0.05492382	0.067608319	0.09286022	0.065377187	0.015541544	0.001005884	0.004788826	0.000719829	0.103004687	0.047728126	0.001027049	0.022353991	0.00094432	0.001996271	0.001359771	0.000731966	0.001626499	0.031953405	0.000893362	0.095154103	0.032212717	0.00161163	0.056096683	0.002758148
Nilutamide	0.025754023	0.020515165	0.010765906	0.000118878	0.037197696	0.104759457	0.002136436	0.000424709	0.000194637	0.009848816	0.006862486	0.009537196	0.002964145	0.000842736	0.000550272	0.015115687	0.007050448	0.019620983	0.009880165	0.0492211	0.025096036	0.02582166	0.292149699	0.042140908	0.037834382	0.012340159	0.017773435	0.02311066	0.042175993	0.045527572	0.000245408	0.000737394	0	0.014532792	0.009326376	0.0004663	0.002637092	0.003717682	0.001032048	0.001047081	0.001196374	0.000930246	0.009520218	0.006132663	0.024977798	0.004435022	0.001640865	0.007477526	0.00235525
Nimotuzumab	0.075747664	0.041027921	0.009805011	0.003813736	0.065529488	0.097234166	0.001892719	0.001978071	0.002589864	0.006063114	0.01100363	0.00685419	0.019158429	0.001839356	0.003209465	0.006213682	0.012848385	0.058891319	0.015707076	0.021532892	0.028115005	0.01896627	0.359328525	0.050343526	0.042318284	0.016237629	0.02075493	0.037056342	0.031792942	0.017295134	0.000626164	0.001487757	0.00107452	0.011572819	0.005001196	0.000839221	0.008481489	0.00117547	0.001575963	0.001435188	0.0008424	0.001229189	0.003304755	0.001200197	0.02307527	0.003531563	0.000948149	0.006486492	0.004650262
Nintedanib_(BIBF_1120)	0.054381353	0.038616607	0.007624983	0.003467519	0.051268199	0.082480886	0.001020466	0.002481156	0.002276099	0.003296493	0.006073153	0.006583564	0.005247697	0.00207512	0.005117616	0.008708956	0.007866282	0.044192373	0.009379069	0.024208324	0.026412343	0.016567401	0.300038254	0.031517643	0.032097545	0.007746804	0.019054633	0.02709616	0.034030937	0.023150487	0.000454665	0.002114518	0.000910314	0.005322584	0.00256364	0.001503426	0.007556511	0.001439988	0.000836851	0.002457881	0.001211167	0.000825689	0.002025084	0.001454412	0.014214087	0.002067018	0.00158574	0.00335202	0.007334624
Niraparib	0.014443497	0.029598443	0.008928514	0.00162782	0.042145265	0.087180836	0.003230622	0	0.01055353	0.01020489	0.013895684	0.011075593	0.001049749	0.000205023	0.00224588	0.001211696	0.006580288	0.014809253	0.012310466	0.023477677	0.029717394	0.025124647	0.339123347	0.032162502	0.053361426	0.012577984	0.034253258	0.029240308	0.018455707	0.010587506	0.000106186	0.001469586	0	0.019665624	0.009076442	0	0.006864836	0.005148448	0.000939986	0.000790061	0.00020385	0	0.006050961	0.001288818	0.018910481	0.006050961	0	0.016336412	0.000524736
Nivolumab_(BMS-936558)	0.043263399	0.059337611	0.004141351	0	0.066278589	0.039740739	0	0	0	0	0.005032206	0	0.001358017	0	0	0.003389325	0.022757466	0.03550092	0.005268357	0.015054799	0.040378795	0.003392499	0.329946799	0.040869833	0.019985676	0.001856776	0.006766015	0.00708284	0.015864177	0.025776573	0	0	0	0	0	0	0.004792577	0	0	0	0	0	0	0	0.00830014	0	0	0	0.003389325
Obinutuzumab	0.014387527	0.0205119	0	0.005735556	0.044125808	0.02827984	0	0	0	0	0.017603041	0	0	0	0	0	0	0.018599387	0	0.026679839	0.084047289	0.035095432	0.386186659	0	0.04042035	0.003263894	0.034746897	0.025107916	0.013294021	0	0	0.004416649	0	0	0	0.007535852	0.013719115	0	0	0	0	0	0	0	0.004534284	0.009987516	0.028144158	0	0
Ofatumumab	0.014387527	0.0205119	0	0.005735556	0.044125808	0.02827984	0	0	0	0	0.017603041	0	0	0	0	0	0	0.018599387	0	0.026679839	0.084047289	0.035095432	0.386186659	0	0.04042035	0.003263894	0.034746897	0.025107916	0.013294021	0	0	0.004416649	0	0	0	0.007535852	0.013719115	0	0	0	0	0	0	0	0.004534284	0.009987516	0.028144158	0	0
Olaparib	0.011554797	0.023678754	0.007142812	0.001302256	0.036255113	0.096205772	0.002584497	0	0.008442824	0.009796938	0.011116547	0.008860474	0.000839799	0.000164018	0.001796704	0.000969357	0.00526423	0.011847402	0.009848373	0.018782142	0.030159612	0.020099718	0.34133531	0.026629832	0.045321607	0.010062387	0.037578116	0.023392247	0.014764566	0.021467158	8.49491E-05	0.004027755	0	0.015732499	0.007261153	0	0.005491869	0.004118758	0.000751989	0.000632048	0.00016308	0	0.004840769	0.001031054	0.015128385	0.004840769	0	0.01306913	0.000419789
Olaratumab	0.053091545	0.042818986	0.008167957	0.004827918	0.053889	0.107860269	0.003555936	0.002909323	0.0027028	0.011820906	0.018211009	0.013173312	0.00723699	0.002566246	0.005641654	0.006568113	0.011315798	0.052890056	0.008866819	0.029512686	0.034295762	0.029167454	0.376132021	0.046832375	0.043419661	0.021278838	0.03201445	0.06344899	0.032182878	0.021324014	0.000592074	0.001649357	0.000648828	0.022551299	0.010776034	0.003667029	0.012954232	0.001609231	0.00048782	0.002610747	0.001445926	0.00156745	0.007449765	0.001460081	0.027170619	0.007420786	0.001257368	0.013068479	0.005952787
Osimertinib	0.075747664	0.041027921	0.009805011	0.003813736	0.065529488	0.097234166	0.001892719	0.001978071	0.002589864	0.006063114	0.01100363	0.00685419	0.019158429	0.001839356	0.003209465	0.006213682	0.012848385	0.058891319	0.015707076	0.021532892	0.028115005	0.01896627	0.359328525	0.050343526	0.042318284	0.016237629	0.02075493	0.037056342	0.031792942	0.017295134	0.000626164	0.001487757	0.00107452	0.011572819	0.005001196	0.000839221	0.008481489	0.00117547	0.001575963	0.001435188	0.0008424	0.001229189	0.003304755	0.001200197	0.02307527	0.003531563	0.000948149	0.006486492	0.004650262
Paclitaxel	0.040107904	0.038936413	0.004239257	0.002542318	0.049023579	0.077045669	0.002873004	0.001524527	0.001436019	0.009384643	0.011989115	0.009919586	0.00333526	0.000944063	0.002280867	0.006155307	0.007261088	0.038457785	0.012014382	0.031057229	0.029530532	0.021258864	0.330868973	0.038797464	0.035865057	0.014815996	0.02510093	0.029108798	0.022579555	0.018832395	0.000520471	0.0008978	0.000558125	0.017014499	0.008238947	0.002970875	0.007771911	0.000603546	0.000766216	0.001112661	0.000785016	0.00381301	0.005241752	0.001247829	0.028353639	0.005419859	0.001060716	0.009570698	0.004899475
Palbociclib	0.036881413	0.054746427	0.009057858	0.001947756	0.039094569	0.105287261	0.009762864	0.001790175	0.002274887	0.043790434	0.02866256	0.032059135	0.011930461	0.001235257	0.002851526	0.00417739	0.05740431	0.029653593	0.003606638	0.065385586	0.048121091	0.051556165	0.385359838	0.071434093	0.048530156	0.031062111	0.045418138	0.050380707	0.045862887	0.016405187	0	0.002002619	0.000238313	0.057886608	0.02655144	0.0014979	0.010217781	4.24878E-05	0.00110937	0.001122829	0.000257382	0.000909502	0.018442535	0.000220279	0.056805925	0.017720981	0.000126688	0.0327228	0.001314113
Panitumumab	0.075747664	0.041027921	0.009805011	0.003813736	0.065529488	0.097234166	0.001892719	0.001978071	0.002589864	0.006063114	0.01100363	0.00685419	0.019158429	0.001839356	0.003209465	0.006213682	0.012848385	0.058891319	0.015707076	0.021532892	0.028115005	0.01896627	0.359328525	0.050343526	0.042318284	0.016237629	0.02075493	0.037056342	0.031792942	0.017295134	0.000626164	0.001487757	0.00107452	0.011572819	0.005001196	0.000839221	0.008481489	0.00117547	0.001575963	0.001435188	0.0008424	0.001229189	0.003304755	0.001200197	0.02307527	0.003531563	0.000948149	0.006486492	0.004650262
Panobinostat	0.03225543	0.053727263	0.020810862	0.002368424	0.038091064	0.130946999	0.014118843	0.000597694	0.00075019	0.044997524	0.044253674	0.052975477	0.002766926	0.000223229	0.000950811	0.004297093	0.035687594	0.028617107	0.010927382	0.105825657	0.067675609	0.080995438	0.417442947	0.066797975	0.0672588	0.046289106	0.06058772	0.081134333	0.056129641	0.022733795	0.002099137	0.000618346	8.477E-05	0.087110414	0.042361407	0.002726076	0.015948876	0.001071041	0.001937264	0.000376875	0.001105236	0.000765988	0.031999197	5.11925E-05	0.081536479	0.026697505	0.000242999	0.04675627	0.000470248
Pazopanib	0.059254002	0.038836274	0.006771552	0.003014076	0.051499323	0.095796274	0.001702552	0.003214871	0.003036974	0.005931624	0.010335955	0.008139677	0.006862636	0.002827088	0.005353309	0.009367782	0.008614402	0.049093395	0.007217277	0.022676062	0.032086459	0.020676577	0.326174975	0.04168773	0.035127407	0.012144592	0.022104169	0.041720863	0.032380524	0.018608516	0.000411056	0.001387436	0.000612312	0.010907364	0.005156099	0.002739665	0.011274932	0.001176105	0.00129527	0.004622438	0.000871844	0.000892212	0.004105849	0.001101306	0.020409923	0.003777289	0.00197892	0.007398129	0.006478521
Pembrolizumab	0.043263399	0.059337611	0.004141351	0	0.066278589	0.039740739	0	0	0	0	0.005032206	0	0.001358017	0	0	0.003389325	0.022757466	0.03550092	0.005268357	0.015054799	0.040378795	0.003392499	0.329946799	0.040869833	0.019985676	0.001856776	0.006766015	0.00708284	0.015864177	0.025776573	0	0	0	0	0	0	0.004792577	0	0	0	0	0	0	0	0.00830014	0	0	0	0.003389325
Perifosine	0.05303074	0.040900028	0.006486956	0.001740337	0.042968842	0.096363665	0.002943023	0.003191535	0.002559014	0.009832969	0.011427836	0.013432948	0.005261716	0.002445912	0.003978843	0.013264567	0.004558645	0.046799448	0.007080336	0.033124396	0.028477091	0.021031046	0.310785961	0.038499809	0.055524429	0.012223066	0.027541311	0.032830103	0.031156054	0.028390206	0.000383	0.001021007	0.00065636	0.018395688	0.008590772	0.000926364	0.0061315	0.000720169	0.000499164	0.001387738	0.001883682	0.001017003	0.005795564	0.00193992	0.029971131	0.005983482	0.001291329	0.010494285	0.011359983
Pertuzumab	0.073996825	0.044871695	0.024776226	0.003456143	0.079894617	0.110907394	0.002586894	0.002165883	0.001618331	0.008869603	0.011915123	0.009851462	0.012004797	0.001735796	0.002834256	0.009462892	0.028729618	0.079880126	0.048679419	0.024548168	0.032671274	0.023389056	0.390811696	0.053366663	0.059302483	0.014131091	0.028194496	0.037301388	0.03299791	0.025906502	0.0021053	0.001623057	0.001775315	0.016480506	0.007712007	0.003164025	0.009208986	0.001463432	0.000664351	0.001688165	0.001407922	0.001422691	0.005275705	0.001097097	0.027229388	0.005555651	0.001489222	0.011130241	0.006834435
Pomalidomide	0.030872107	0.029878419	0.005711076	0.000967021	0.059214766	0.062758584	0.002785119	0.001258339	0.001967703	0.006983997	0.013877806	0.009031369	0.002349305	0.000556987	0.001447759	0.002949237	0.004642122	0.031833701	0.01066889	0.036184467	0.022081402	0.027454985	0.360149733	0.034229837	0.025370842	0.011069647	0.034349811	0.028950495	0.018752464	0.008042342	0.000410054	0.000868413	0.000394576	0.01383129	0.007055401	0.002689113	0.005732489	0.001228781	0.00010851	0.000614715	0.000952628	0.000534373	0.004826246	0.000735192	0.022751791	0.004831472	0.001534601	0.007720755	0.002249394
Ponatinib	0.037619464	0.091654039	0.014290078	0.003136951	0.039257758	0.151951844	0.021722032	0.003595338	0.002064555	0.070802995	0.066788692	0.085515605	0.00643961	0.002250458	0.002891037	0.004424182	0.093819599	0.064038194	0.004270176	0.168172883	0.098880417	0.103998846	0.497462417	0.099472262	0.093585666	0.06984903	0.084052195	0.113438419	0.083751044	0.016925977	0.001130315	0.004781325	0.000697101	0.140971224	0.065209818	0.000111236	0.024416564	0.00163199	0.006023239	0.001094829	0.000459735	0.002352775	0.043588396	0.000420556	0.125345584	0.043637206	0.00017743	0.076462535	0.003560694
Ramucirumab_(Cyramza)	0.051883406	0.030308004	0.005341632	0.00411868	0.045135096	0.096518784	0.000890947	0.001880056	0.002325417	0.003392982	0.007667858	0.005406068	0.004148123	0.001978014	0.004979316	0.008311543	0.006686445	0.044358022	0.007627192	0.019124141	0.027007289	0.016416334	0.337812764	0.035781311	0.035786706	0.011903844	0.019553708	0.031176567	0.03010893	0.015233277	0.0001725	0.000855029	0.000809166	0.005839896	0.002818297	0.000728242	0.016448706	0.001297272	0.000770646	0.004799504	0.00067238	0.000867326	0.002599025	0.00137068	0.015387916	0.002138393	0.001978007	0.004854934	0.003535025
Regorafenib	0.066571523	0.049913693	0.006789264	0.002794373	0.056768945	0.104338231	0.004853906	0.001712321	0.002207729	0.015430662	0.017000301	0.018705043	0.005460635	0.001329643	0.003088097	0.007810193	0.017533155	0.05399977	0.006622704	0.065318703	0.041221506	0.034161544	0.335916956	0.059237717	0.043322247	0.019707837	0.02963871	0.052016491	0.037736673	0.017775813	0.000741781	0.00254962	0.000702134	0.030227423	0.014099703	0.001967714	0.009083689	0.000908475	0.001670606	0.002326597	0.000634399	0.001621585	0.009606887	0.002151481	0.043162374	0.0095411	0.001665085	0.016756452	0.005744945
Ribociclib	0.036881413	0.054746427	0.009057858	0.001947756	0.039094569	0.105287261	0.009762864	0.001790175	0.002274887	0.043790434	0.02866256	0.032059135	0.011930461	0.001235257	0.002851526	0.00417739	0.05740431	0.029653593	0.003606638	0.065385586	0.048121091	0.051556165	0.385359838	0.071434093	0.048530156	0.031062111	0.045418138	0.050380707	0.045862887	0.016405187	0	0.002002619	0.000238313	0.057886608	0.02655144	0.0014979	0.010217781	4.24878E-05	0.00110937	0.001122829	0.000257382	0.000909502	0.018442535	0.000220279	0.056805925	0.017720981	0.000126688	0.0327228	0.001314113
Rigosertib	0.012336768	0.005517952	0.009732586	0	0.016484845	0.066916592	0.000490435	0.000194228	0.000739416	0.00890494	0.001654642	0.001819196	0.0018457	0.000326793	0.001316098	0.002212521	0.039446947	0.035798944	0.000265805	0.012470827	0.018109922	0.018185569	0.264877043	0.009659695	0.027802555	0.003761537	0.008647708	0.009542186	0.020794887	0.01888569	0.001772933	0.006239674	0.000318845	0.003187828	0.001471305	0	0.000673772	0	0.000302314	0	0.000149962	0.000733518	0.001107765	6.31282E-05	0.012288313	0.00098087	6.31282E-05	0.001716523	0.000146807
Rituximab	0.014387527	0.0205119	0	0.005735556	0.044125808	0.02827984	0	0	0	0	0.017603041	0	0	0	0	0	0	0.018599387	0	0.026679839	0.084047289	0.035095432	0.386186659	0	0.04042035	0.003263894	0.034746897	0.025107916	0.013294021	0	0	0.004416649	0	0	0	0.007535852	0.013719115	0	0	0	0	0	0	0	0.004534284	0.009987516	0.028144158	0	0
Romidepsin	0.03225543	0.053727263	0.020810862	0.002368424	0.038091064	0.130946999	0.014118843	0.000597694	0.00075019	0.044997524	0.044253674	0.052975477	0.002766926	0.000223229	0.000950811	0.004297093	0.035687594	0.028617107	0.010927382	0.105825657	0.067675609	0.080995438	0.417442947	0.066797975	0.0672588	0.046289106	0.06058772	0.081134333	0.056129641	0.022733795	0.002099137	0.000618346	8.477E-05	0.087110414	0.042361407	0.002726076	0.015948876	0.001071041	0.001937264	0.000376875	0.001105236	0.000765988	0.031999197	5.11925E-05	0.081536479	0.026697505	0.000242999	0.04675627	0.000470248
Rucaparib	0.014443497	0.029598443	0.008928514	0.00162782	0.042145265	0.087180836	0.003230622	0	0.01055353	0.01020489	0.013895684	0.011075593	0.001049749	0.000205023	0.00224588	0.001211696	0.006580288	0.014809253	0.012310466	0.023477677	0.029717394	0.025124647	0.339123347	0.032162502	0.053361426	0.012577984	0.034253258	0.029240308	0.018455707	0.010587506	0.000106186	0.001469586	0	0.019665624	0.009076442	0	0.006864836	0.005148448	0.000939986	0.000790061	0.00020385	0	0.006050961	0.001288818	0.018910481	0.006050961	0	0.016336412	0.000524736
Ruxolitinib	0.071875771	0.028572189	0.007991513	0.000812811	0.039675955	0.095600063	0.000476669	0.000927291	0.001075304	0.00143729	0.003418679	0.001826213	0.005152259	0.000619783	0.002058409	0.014714887	0.003812093	0.052964952	0.01289427	0.018860077	0.02921245	0.015280146	0.322953418	0.018798646	0.023931403	0.008235693	0.021037356	0.027373213	0.030807513	0.019779322	0.000627348	0.000725791	0.00023391	0.001852081	0.001115213	0.001662087	0.011433371	0.00048893	0.000698062	0.001423846	0.000526415	0.000517075	0.000808385	0.001573855	0.010273108	0.000823346	0.002025001	0.001067931	0.01332141
Selumetinib	0.075457956	0.043697637	0.005011631	0.00254127	0.076569737	0.095220326	0.002121854	0.002478125	0.003451515	0.007216484	0.010017896	0.007383241	0.008147056	0.001508305	0.002502979	0.008722594	0.005246544	0.058778139	0.006458213	0.030591699	0.028929268	0.021949301	0.335847748	0.051592194	0.038423464	0.01236421	0.019833856	0.046749278	0.029060638	0.016293094	0.000756424	0.00243263	0.000894388	0.013502993	0.005938912	0.001041422	0.005823324	0.001385761	0.000850311	0.002129495	0.000629786	0.00131632	0.004020894	0.002121237	0.037763528	0.004187796	0.001153685	0.007574448	0.006743385
Siltuximab	0.037439265	0.030855822	0.00714111	0.00217951	0.043247761	0.078188949	0.001777703	0.001925757	0.001443515	0.006139656	0.014903515	0.007012143	0.003179721	0.001025133	0.003124356	0.003202777	0.019327596	0.032487924	0.012302542	0.032557661	0.025464089	0.027435824	0.402068623	0.030711278	0.037493223	0.012460394	0.025862653	0.029478999	0.02241181	0.012126994	0.000241722	0.001233877	0.000451911	0.011148335	0.005558904	0.003455995	0.009299918	0.000820996	0.000605387	0.002199275	0.000672747	0.000822714	0.003742891	0.00269066	0.016762248	0.003850007	0.002028984	0.006390781	0.002582325
Sonidegib_(LDE225)	0.001241857	0.015091997	0.002229062	0	0.029883785	0.123228183	0	0	0	0.001799545	0	0	0	0	0.00460278	0.007424236	0.003656124	0.058649906	0	0.003080943	0.008278152	0.00975478	0.305843009	0	0.011027771	0.015463875	0.050925664	0.008045277	0.00917462	0.012215986	0.001515758	0	0	0	0	0.005751093	0	0	0	0	0.006389396	0.003623031	0	0	0	0	0	0	0.007424236
Sorafenib	0.072612851	0.041258488	0.00610196	0.002574666	0.062860741	0.090926248	0.001461848	0.002360667	0.002909261	0.005699485	0.008354011	0.006355885	0.007488444	0.002041644	0.003523123	0.00875608	0.008565461	0.055668483	0.008096741	0.024705143	0.026849594	0.018339851	0.325413829	0.044948134	0.039261128	0.010655104	0.018573465	0.047443662	0.03250844	0.018167294	0.00060199	0.002609552	0.000723366	0.009282758	0.00430411	0.001394892	0.006968847	0.001068538	0.001194329	0.002975793	0.000737988	0.001410309	0.003312703	0.002455101	0.028000025	0.003118161	0.001697028	0.005835054	0.00616357
Sunitinib	0.05912013	0.039217339	0.008788748	0.003072222	0.051772375	0.09509304	0.001625163	0.003190711	0.00289893	0.005662005	0.010073357	0.008209504	0.006725237	0.002698584	0.005158928	0.00907165	0.008263928	0.04854964	0.007056977	0.023002737	0.031879944	0.020570531	0.325375122	0.04191332	0.034770022	0.011724807	0.021695383	0.041079898	0.03150602	0.018292118	0.000392372	0.001324371	0.00058448	0.010411575	0.004921731	0.002698658	0.010986891	0.001122646	0.001236394	0.004625939	0.000986807	0.000963245	0.003919219	0.00116948	0.019965647	0.003679729	0.002203568	0.00706185	0.006430578
Tamoxifen	0.038640671	0.044059102	0.009456024	0.000850272	0.081671094	0.101107418	0.009525324	0.001442745	0.001726711	0.025351752	0.02631715	0.02975962	0.006769707	0.001241035	0.001755933	0.006974384	0.01035936	0.051262823	0.004448772	0.063874515	0.047634576	0.045948214	0.37064249	0.076286359	0.049606185	0.04774825	0.046019687	0.045729237	0.048648976	0.016698293	0.001347537	0.001553033	0.000161834	0.052099654	0.02379642	0.008169578	0.00847414	0.001439882	0.001588565	0.000251966	0.001143217	0.002924625	0.017407589	0.003407067	0.056706255	0.015690543	0.00040639	0.027308488	0.005539815
Tecemotide_(Emepepimut-S_L-BLP25)	0.047361768	0.033348565	0.004869816	0.001479721	0.051363091	0.058363053	0	0.002144334	0.001446697	0.000385934	0.006684322	0.000800239	0.002910874	0.001342367	0.002081299	0.002205855	0.009078346	0.048919561	0.011528685	0.018445166	0.039505575	0.006460493	0.337014169	0.029552082	0.041977397	0.003151373	0.023490406	0.028032474	0.025324874	0.013405038	0.000127677	0	0.000437142	0.010007803	0	0.000575378	0.019983787	0.000157438	8.46809E-05	0.000547682	0.000206888	0.000492915	0.00497833	0.009721249	0.009347221	0.000497157	0.009993147	0.00095009	0.001764606
Temozolomide	0.037305677	0.057529365	0	0	0.031612913	0.1432506	0.015903573	0	0.015146008	0.055920796	0.052303732	0.058684953	0	0	0	0	0	0.008676596	0.00093343	0.119937349	0.065637494	0.083211086	0.450105029	0.064592179	0.070387586	0.047710719	0.083120182	0.059133896	0.059344729	0.021270898	0	0.011756691	0	0.103373225	0.047710719	0	0.015903573	0	0.007519892	0	0	0	0.031807146	0.006211712	0.091876545	0.031807146	0	0.055662506	0
Temsirolimus	0.02928756	0.037029416	0.00572073	0.001527838	0.036075165	0.065960769	0.001590156	0.004619024	0.002566344	0.006146476	0.00633121	0.012055382	0.004041095	0.003356615	0.002911558	0.00759203	0.006399747	0.03750617	0.009226349	0.019980946	0.024945371	0.012447124	0.26530739	0.036978242	0.045378299	0.008650328	0.01493231	0.026305554	0.029658178	0.030225605	0.000443896	0.000784396	0.000545843	0.010304726	0.00482678	0.001303563	0.00400224	0.002404071	0.000461385	0.001342411	0.004424701	0.001353297	0.003446246	0.002340768	0.019224223	0.003410127	0.001108385	0.005791007	0.005408961
Thalidomide	0.036973427	0.033953517	0.011009422	0.002215391	0.051778021	0.080087485	0.003350914	0.001488853	0.001975168	0.009500415	0.014220004	0.010994959	0.003178325	0.001167533	0.002828888	0.004648874	0.005328327	0.032760322	0.007526482	0.041655562	0.025960303	0.026052906	0.322651537	0.037137446	0.02920114	0.014061013	0.029001297	0.029653336	0.021361442	0.010824087	0.000401132	0.000916284	0.000645698	0.018209211	0.008643908	0.001770135	0.006639646	0.000761361	0.00042484	0.001125881	0.000759769	0.00130262	0.005767424	0.001027981	0.03574006	0.005950584	0.000909192	0.010375273	0.003486013
Tivantinib	0.036958722	0.029859713	0.014002439	0.005026107	0.047701447	0.115523557	0.001425409	0.001857275	0.001869528	0.004502757	0.008375471	0.007260707	0.004613518	0.001164969	0.002794971	0.00863046	0.010198003	0.051681715	0.0085969	0.022914023	0.02618985	0.018461512	0.329111983	0.028718303	0.035528489	0.010650964	0.02024823	0.027869675	0.027605141	0.020018863	0.000931074	0.001251707	0.001208252	0.008109129	0.004089383	0.000879291	0.008885981	0.001085495	0.001142939	0.003542241	0.001117803	0.001822222	0.002704294	0.001562593	0.015959042	0.003028967	0.001304437	0.005071161	0.00624776
Tivozanib	0.052228539	0.029501401	0.006750787	0.003753204	0.046538976	0.097421059	0.000989279	0.002178873	0.002107409	0.003627794	0.007575343	0.006539387	0.004181076	0.001858636	0.004512505	0.008697294	0.007042099	0.043605737	0.009690974	0.021498149	0.026613307	0.017475844	0.33504356	0.034129583	0.036023265	0.011661236	0.019843581	0.031625477	0.032808185	0.016442749	0.000278072	0.00077487	0.000733307	0.006474484	0.003099656	0.001040998	0.015088498	0.001175653	0.000850444	0.006762973	0.000717418	0.000786014	0.002719083	0.001281183	0.01662594	0.002379227	0.002144998	0.005180298	0.004074916
Toremifene	0.039430858	0.045435949	0.009277501	0.000876843	0.077421852	0.095756052	0.008040123	0.001487831	0.001780671	0.026143995	0.027139561	0.030689608	0.00698126	0.001279818	0.001810806	0.007192334	0.010265755	0.051081919	0.004587796	0.065870594	0.048635656	0.047384096	0.374877048	0.078252974	0.051156378	0.049240383	0.046623605	0.047158276	0.047019134	0.017220115	0.001389647	0.000767368	0.000166891	0.052893571	0.024540059	0.00759068	0.008738956	0.001484878	0.000804011	0.00025984	0.001178943	0.003016019	0.017477553	0.003513538	0.058478326	0.016180872	0.00041909	0.028161878	0.005712934
Trametinib_(Mekinst)	0.075457956	0.043697637	0.005011631	0.00254127	0.076569737	0.095220326	0.002121854	0.002478125	0.003451515	0.007216484	0.010017896	0.007383241	0.008147056	0.001508305	0.002502979	0.008722594	0.005246544	0.058778139	0.006458213	0.030591699	0.028929268	0.021949301	0.335847748	0.051592194	0.038423464	0.01236421	0.019833856	0.046749278	0.029060638	0.016293094	0.000756424	0.00243263	0.000894388	0.013502993	0.005938912	0.001041422	0.005823324	0.001385761	0.000850311	0.002129495	0.000629786	0.00131632	0.004020894	0.002121237	0.037763528	0.004187796	0.001153685	0.007574448	0.006743385
Trastuzumab	0.073996825	0.044871695	0.024776226	0.003456143	0.079894617	0.110907394	0.002586894	0.002165883	0.001618331	0.008869603	0.011915123	0.009851462	0.012004797	0.001735796	0.002834256	0.009462892	0.028729618	0.079880126	0.048679419	0.024548168	0.032671274	0.023389056	0.390811696	0.053366663	0.059302483	0.014131091	0.028194496	0.037301388	0.03299791	0.025906502	0.0021053	0.001623057	0.001775315	0.016480506	0.007712007	0.003164025	0.009208986	0.001463432	0.000664351	0.001688165	0.001407922	0.001422691	0.005275705	0.001097097	0.027229388	0.005555651	0.001489222	0.011130241	0.006834435
Trebananib	0.070260321	0.048298706	0.007149707	0.002732437	0.055367166	0.080941388	0.001290088	0.002125514	0.001161512	0.004665257	0.012267226	0.005268573	0.004209415	0.001199101	0.005426811	0.005898906	0.008537002	0.056291716	0.006633325	0.027053609	0.024750181	0.032573373	0.386955752	0.045459961	0.034238118	0.011268968	0.025468541	0.031778353	0.024565421	0.018745847	0.000210745	0.000864137	0.000435385	0.007450316	0.003789876	0.001225272	0.013582528	0.000578536	0.002460952	0.00319377	0.000396313	0.000818675	0.002323622	0.004299677	0.017533561	0.002376359	0.00154775	0.004342556	0.004644685
Vandetanib	0.059907005	0.031577815	0.007019562	0.002801901	0.049728285	0.08102103	0.001220305	0.001789556	0.002219653	0.003932003	0.007316344	0.009577837	0.012884136	0.001995808	0.002893572	0.006996192	0.008315435	0.046111477	0.010811235	0.016722686	0.024227887	0.01369512	0.30241265	0.038583376	0.040610014	0.010928002	0.015667257	0.028029515	0.033182489	0.022848631	0.000403711	0.000959212	0.000880002	0.007525299	0.003224456	0.000541077	0.008105181	0.001006891	0.001265008	0.001996172	0.001848677	0.001128169	0.002450725	0.000936539	0.018012067	0.002340134	0.001036912	0.004685637	0.004222885
Veliparib	0.010077723	0.018335235	0.003786438	0.002158279	0.043603241	0.094427204	0.004150136	0	0.03138526	0.012450407	0.026221324	0.014959894	0.001285937	0.000485388	0.003177084	0.001242302	0.018537115	0.016110609	0.013561287	0.025648573	0.025209372	0.044327046	0.443473117	0.01894567	0.045257003	0.01778346	0.035956827	0.038708651	0.020517224	0.009655164	0	0	0	0.026975881	0.012450407	0	0.013239732	0	0	0.001870452	0	0	0.008300271	0.002049416	0.024028664	0.008300271	0	0.014525475	0.001242302
Vemurafenib	0.091601357	0.059425381	0.006081762	0.001936321	0.077555018	0.098234024	0.002518593	0.003034077	0.003199589	0.008779839	0.014498255	0.009553044	0.006355225	0.002245725	0.003901777	0.005616709	0.006643533	0.077614039	0.006217973	0.030164302	0.029759749	0.023091209	0.353472779	0.074655809	0.044221993	0.013384807	0.022334378	0.05380237	0.024326081	0.018492034	0.000482427	0.005708938	0.000875584	0.015519586	0.007102316	0.001075764	0.006967051	0.000862839	0.000218077	0.001808028	0.001015456	0.002601514	0.004923431	0.001650231	0.036430484	0.004899559	0.001197883	0.008830169	0.004111201
Venetoclax	0.045884976	0.042835353	0.005021905	0.001811611	0.055928291	0.076629909	0.00284993	0.002246109	0.001648945	0.008747975	0.013992231	0.009647595	0.003496717	0.001291246	0.002815463	0.006178075	0.008127345	0.041901844	0.018745327	0.031197026	0.032488885	0.023601656	0.355074576	0.040220042	0.039262835	0.014651769	0.029438642	0.032638132	0.021694666	0.015348928	0.000244969	0.00152626	0.000172334	0.01683786	0.007895684	0.004391709	0.01038318	0.000440863	0.000682076	0.001720709	0.000453516	0.001217991	0.005191966	0.001859587	0.025097709	0.005296609	0.001127295	0.009511536	0.005193525
Vinblastine	0.041672334	0.032224767	0.005145657	0.002409888	0.051319926	0.100484953	0.004030594	0.001206924	0.002092902	0.012847551	0.013740815	0.013744787	0.004212861	0.000446828	0.003177454	0.006873359	0.012252955	0.035925714	0.00999179	0.04952809	0.034975398	0.032181376	0.30263872	0.044639334	0.033806954	0.015972996	0.025978036	0.033478231	0.029244826	0.014736	0.000685662	0.000866282	0.000698361	0.023631205	0.011256001	0.002349916	0.007027938	0.000486462	0.000757527	0.001067009	0.001294279	0.003913612	0.008035907	0.000820862	0.035574931	0.007446367	0.000991663	0.013041958	0.003882428
Vincristine	0.006256808	0.00843154	0	0.007117855	0.029923779	0.05520388	0	0	0.001032986	0.004675212	0.000532938	0	0.001061034	0	0.001479007	0.002220785	0.002368353	0.024158643	0.000605304	0.004926945	0.014164162	0.005874112	0.246975256	0.022176865	0.011204507	0.008804534	0.005597412	0.0094966	0.011861394	0.017563873	0.000319107	0	0.002452035	0	0	0	0	0	0.001275129	0	0.001691891	0.01623131	0	0	0.011904833	0	0.00023939	0	0.000405221
Vindesine	0.006256808	0.00843154	0	0.007117855	0.029923779	0.05520388	0	0	0.001032986	0.004675212	0.000532938	0	0.001061034	0	0.001479007	0.002220785	0.002368353	0.024158643	0.000605304	0.004926945	0.014164162	0.005874112	0.246975256	0.022176865	0.011204507	0.008804534	0.005597412	0.0094966	0.011861394	0.017563873	0.000319107	0	0.002452035	0	0	0	0	0	0.001275129	0	0.001691891	0.01623131	0	0	0.011904833	0	0.00023939	0	0.000405221
Vinorelbine	0.006256808	0.00843154	0	0.007117855	0.029923779	0.05520388	0	0	0.001032986	0.004675212	0.000532938	0	0.001061034	0	0.001479007	0.002220785	0.002368353	0.024158643	0.000605304	0.004926945	0.014164162	0.005874112	0.246975256	0.022176865	0.011204507	0.008804534	0.005597412	0.0094966	0.011861394	0.017563873	0.000319107	0	0.002452035	0	0	0	0	0	0.001275129	0	0.001691891	0.01623131	0	0	0.011904833	0	0.00023939	0	0.000405221
Vismodegib	0.001241857	0.015091997	0.002229062	0	0.029883785	0.123228183	0	0	0	0.001799545	0	0	0	0	0.00460278	0.007424236	0.003656124	0.058649906	0	0.003080943	0.008278152	0.00975478	0.305843009	0	0.011027771	0.015463875	0.050925664	0.008045277	0.00917462	0.012215986	0.001515758	0	0	0	0	0.005751093	0	0	0	0	0.006389396	0.003623031	0	0	0	0	0	0	0.007424236
Vorinostat	0.03225543	0.053727263	0.020810862	0.002368424	0.038091064	0.130946999	0.014118843	0.000597694	0.00075019	0.044997524	0.044253674	0.052975477	0.002766926	0.000223229	0.000950811	0.004297093	0.035687594	0.028617107	0.010927382	0.105825657	0.067675609	0.080995438	0.417442947	0.066797975	0.0672588	0.046289106	0.06058772	0.081134333	0.056129641	0.022733795	0.002099137	0.000618346	8.477E-05	0.087110414	0.042361407	0.002726076	0.015948876	0.001071041	0.001937264	0.000376875	0.001105236	0.000765988	0.031999197	5.11925E-05	0.081536479	0.026697505	0.000242999	0.04675627	0.000470248
[truncated: 3,751 more columns]
